# Supplementary material for: Water-driven ligations using cyclic aminosquarates: a class of useful SN1-like reactions
Source: Royal Society of Chemistry journal article supplement (doi:10.1039/c0cc03989f), 2010-11-16

Supporting Information for:  
**Water-Driven Ligations Using Cyclic Amino  
Squarates: Making SN1-Like Reactions Useful**

*Dawei Cui, Deepali Prashar, Preeti Sejwal, Yan-Yeung Luk\**

Department of Chemistry, Syracuse University, Syracuse, NY-13244

[yluk@syr.edu](mailto:yluk@syr.edu)

**Contents**

|                                                                                                  |   |
|--------------------------------------------------------------------------------------------------|---|
| 1. General information of the synthesis and characterization of the new compounds.               | 2 |
| 2. Ligation of cyclic squarate derivatives <b>3-5</b> with L-cysteine and L-cysteine ethyl ester | 7 |
| 3. UV spectra of <b>3</b> , NHS-Biotin, and SQ-Biotin                                            | 7 |
| 4. The Maldi-Tof spectra for the ligation of the proteins using squarate pyridium salts.         | 8 |

## 1. General Information of the synthesis and characterization of the new compounds.

**General Experimental Methods.**  $^1\text{H}$  NMR and  $^{13}\text{C}$  NMR spectra were recorded on a 300 MHz spectrometer and the chemical shifts were measured from the solvent peak as an internal standard. Chemical shifts and coupling constants ( $J$ -value) are reported in ppm and Hertz respectively. The following abbreviations are used for spin multiplicity: s = singlet, d = doublet, t = triplet, q = quartet, m = multiplet, br = broad. High Resolution Mass spectra (HRMS) samples were analyzed by positive ion electrospray. Analytical thin-layer chromatography (TLC) was performed using silica gel 60 F254 pre-coated plates (0.25-mm thickness). Preparative TLC separations were made on precoated analytical plates, 0.50 mm thick, silica gel 60 F254. Flash column chromatography was performed with Silica-P Flash Silica Gel (ultra pure 40-63 $\mu\text{m}$ ). Reagents and solvents purchased from Aldrich Chemical Co., Acros Organics, VWR International Inc., Pfaltz & Bauer and Pharmco and used without any further purification. All reactions were carried out in oven-dried glassware under argon or nitrogen atmosphere unless otherwise specified.

### 1.1 Synthesis of 1H-benzo[e]cyclobuta[b][1,4]thiazine-1,2(8H)-dione (**2**)

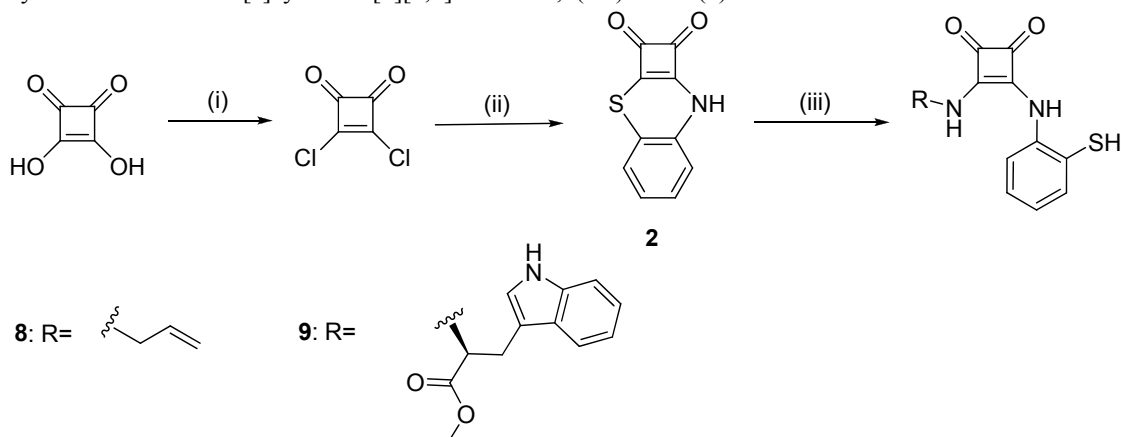

Reagents and conditions: (i) oxalyl chloride, DMF,  $\text{CCl}_4$ ,  $-78^\circ\text{C}$  to reflux, 3hr; (ii) 2-aminothiophenol, TEA, benzene,  $0^\circ\text{C}$  to reflux, 16hr; (iii)  $\text{RNH}_2$ , TEA, THF, r.t., 16hr.

#### (1) Synthesis of **2**

Finely powdered 1,2-Dihydroxycyclobutene-3,4-dione (0.57 g, 5 mmol), carbon tetrachloride (10 mL), and DMF (0.05mL), were introduced into a 25 mL round-bottomed flask previously filled with argon. The mixture was frozen by immersion in dry ice-acetone and oxalyl chloride (0.85 mL, 10 mmol) was introduced at once through the condenser's outlet. Then the flask was allowed to warm to room temperature, agitation started at 300 rpm, and the flask was then lowered into an oil bath thermostatted to  $50\text{--}60^\circ\text{C}$ . Regular gas evolution started immediately and was no more apparent after 50 min. After further 2hr, heating and agitation were discontinued. The solvent was removed to give 1,2-dichlorocyclobutene-3,4-dione (0.6g) as yellow crystal.

1,2-Dichlorocyclobutene-3,4-dione (0.6g) was dissolved in dry benzene (50mL) and cooled down to  $0^\circ\text{C}$  under argon atmosphere. 1 eq of thiophenol was added in one portion, followed by addition of excess of triethylamine (2.2eq) in anhydrous benzene (5mL). Reaction mixture was stirred at  $0^\circ\text{C}$  for 0.5hr, at r.t. for 0.5hr and at reflux overnight. The mixture was filtered and the solid was washed with water and methanol to give a yellow solid. Yield: 0.45g (55%).  $^1\text{H}$ NMR (300 MHz,  $\text{DMSO-d}_6$ ) :  $\delta$  7.35-6.89 (m, 3H), 6.73-6.70 (m, 1H).  $^{13}\text{C}$ NMR (75 MHz,  $\text{DMSO-d}_6$ ) :  $\delta$  183.84, 183.39, 179.66, 164.62, 134.48, 129.57, 128.39, 126.63, 119.14, 115.03. MS: cacl. for  $\text{M}^+$ : 203, found: 203.

#### (2) General procedures for the synthesis of **8** and **9**

To a mixture of **2** (1mmol, 1eq) and TEA (2mmol, 2eq) in dry THF (20mL) at r.t. under Ar was added substituted amine (3mmol, 1.5eq). The mixture was stirred at r.t. overnight. The mixture was concentrated and the residue was partitioned between water and ethyl acetate. The organic layer was separated, washed with brine, dried and concentrated. The residue was purified by flash chromatography using PE:EA (1:1) as eluent to give a yellow solid. 3-(Allylamino)-4-(2-mercaptophenylamino)cyclobut-3-ene-1,2-dione (**8**): Yield 0.17g (65%). MS  $m/z$  (%): cacl. for  $[\text{M}+\text{H}]^+$ : 261.1, found: 261.1;  $^1\text{H}$ NMR (300 MHz,  $\text{DMSO-d}_6$ ) :  $\delta$  9.59 (brs, 1H), 8.70-8.66 (1H), 8.19 (s, 1H), 6.91-6.74 (m, 3H), 6.54 (dd,  $J = 7.5$  Hz, 3Hz, 1H), 5.85-5.72 (m, 1H), 5.11-5.01 (m, 2H), 3.73-3.68 (m, 2H).

$^{13}\text{C}$ NMR (75MHz,  $\text{DMSO-d}_6$ ) :  $\delta$  177.52, 163.26, 147.03, 135.38, 135.27, 128.19, 127.72, 126.83, 120.97, 117.66, 116.26, 102.40, 41.64.

(S)-methyl-3-(1H-indol-3-yl)-2-(2-(2-mercaptophenylamino)-3,4-dioxocyclobut-1-enylamino)propanoate (**9**). Yield 0.23g (55%). MS  $m/z$  (%): cacl. for  $[\text{M}+\text{H}]^+$ : 422.1, found: 422.1;  $^1\text{H}$ NMR (300 MHz,  $\text{DMSO-d}_6$ ) :  $\delta$  10.86 (s, 1H), 9.73 (s, 1H), 8.73 (d,  $J$  = 7.8 Hz, 1H), 8.03 (s, 1H), 7.46 (d,  $J$  = 7.8 Hz, 1H), 7.33 (d,  $J$  = 7.8 Hz, 1H), 7.13 (s, 1H), 7.06-6.78 (m, 5H), 6.56 (d,  $J$  = 7.8 Hz, 1H), 4.53 (m, 1H), 3.62 (s, 3H), 3.21 (m, 2H);  $^{13}\text{C}$ NMR (75MHz,  $\text{DMSO-d}_6$ ) :  $\delta$  176.24, 171.77, 162.83, 146.36, 136.21, 134.43, 127.48, 127.09, 126.99, 126.20, 123.92, 121.14, 120.14, 118.59, 118.08, 117.02, 111.62, 109.38, 101.63, 53.04, 52.23, 26.43.

1.2 Synthesis of 4-((1,2-dioxo-1,2-dihydrobenzo[*f*]cyclobuta[*b*][1,4]oxazepin-9(8H)-yl)-methyl)-1-methylpyridinium iodide (**3**)

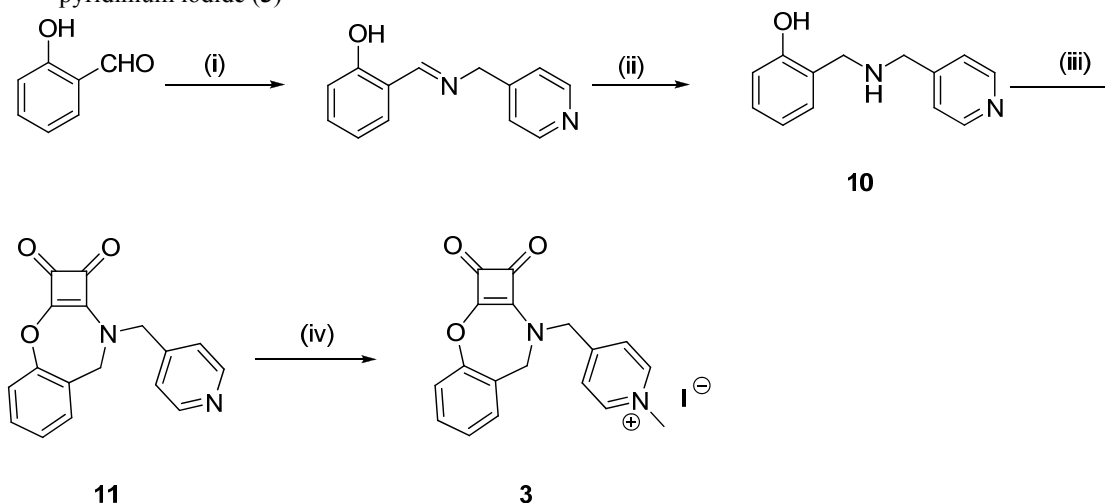

Reagents and conditions: (i) 4-aminomethyl pyridine, EtOH, r.t. 1hr; (ii)  $\text{NaBH}_4$ , EtOH,  $0^\circ\text{C}$  to r.t., 1hr; (iii) 3,4-dichlorocyclobutene-1,2-dione, TEA, benzene,  $0^\circ\text{C}$  to reflux, 16hr; (iv)  $\text{CH}_3\text{I}$ ,  $\text{CH}_2\text{Cl}_2$ , r.t., 16hr

(1) Synthesis of 2-((pyridin-4-ylmethylamino)methyl)phenol (**10**)

A mixture of salicylaldehyde (10mmol) and amine (1eq) in EtOH (10mL) was stirred at r.t. for 2hr. The mixture was cooled to  $0^\circ\text{C}$  and  $\text{NaBH}_4$  (1.2 eq) was added in portions. The mixture was then stirred at that temp. for 2hr. The reaction was quenched by water and concentrated. The residue was partitioned between water and DCM. The organic layers were combined, dried and concentrated. The residue was purified by flash chromatography using DCM:MeOH (20:1) as eluent to give a colorless sticky oil. Yield 1.9g (90%).  $^1\text{H}$ NMR (300 MHz,  $\text{CDCl}_3$ ) :  $\delta$  8.61-8.56 (m, 2H), 7.26-7.01 (m, 3H), 7.01-6.78 (m, 3H), 4.06 (s, 2H), 3.85 (s, 2H).

(2) Synthesis of 9-(pyridin-4-ylmethyl)-8,9-dihydrobenzo[*f*]cyclobuta[*b*][1,4]oxazepin-1,2-dione (**11**)

1,2-Dichlorocyclobutene-3,4-dione (0.6g) was dissolved in dry benzene (50mL) and cooled down to  $0^\circ\text{C}$  under argon atmosphere. 1 eq of 2-((pyridin-4-ylmethylamino)-methyl)phenol in anhydrous benzene (25mL) was added dropwise, accompanied by addition of excess of triethyl amine (2.2eq) in anhydrous benzene (25mL). Reaction mixture was stirred at  $0^\circ\text{C}$  for 0.5hr, at r.t. for 0.5hr and at reflux overnight. The reaction mixture was then filtered and concentrated. Flash chromatography using Hexanes (100mL), DCM (100mL), DCM:MeOH (100:1, 200mL), DCM:MeOH (80:1, 200mL), DCM:MeOH (60:1) as eluent afforded a brown sticky oil, which was dried under high vacuum to give a foamy solid. Yield: 0.19g (16.3%). MS  $m/z$  (%): cacl. for  $[\text{M}+\text{H}]^+$ : 293.1, found: 293.1;  $^1\text{H}$ NMR (300 MHz,  $\text{DMSO-d}_6$ ) :  $\delta$  8.57 (dd,  $J$  = 1.5, 4.5Hz, 2H), 7.48-7.31 (m, 5H), 7.22-7.16 (m, 1H), 4.89 (s, 2H), 4.67 (s, 2H).

(3) Synthesis of 4-((1,2-dioxo-1,2-dihydrobenzo[*f*]cyclobuta[*b*][1,4]oxazepin-9(8H)-yl)methyl)-1-methylpyridinium iodide (**3**)

A mixture of 9-(pyridin-4-ylmethyl)-8,9-dihydrobenzo[*f*]cyclobuta[*b*][1,4]oxazepin-1,2-dione (20mg) and iodomethane (excess) in anhydrous DCM (0.4mL) was stirred at r.t. for overnight. The mixture was filtered and the solid was dried under high vacuum to give a pale white solid with rather good water solubility. Yield : 18.9mg

(90%). HRMS  $m/z$ : cacl. for  $[M+H-I]^+$ : 307.1082, found: 307.1083;  $^1\text{H NMR}$  (300 MHz,  $\text{DMSO-d}_6$ ):  $\delta$  8.96 (d,  $J=6.3\text{Hz}$ , 2H), 8.11 (d,  $J=6.0\text{Hz}$ , 2H), 7.51-7.19 (m, 4H), 5.16 (s, 2H), 4.74 (s, 2H), 4.32 (s, 3H).  $^{13}\text{C NMR}$  (75MHz,  $\text{DMSO-d}_6$ ):  $\delta$  188.44, 181.18, 175.26, 173.81, 155.30, 154.41, 145.69, 132.27, 130.86, 125.91, 125.37, 123.61, 120.50, 53.86, 52.73, 47.65.

1.3 Synthesis of 4-((6-fluoro-1,2-dioxo-1,2-dihydrobenzo[f]cyclobuta[b][1,4]oxazepin-9(8H)-yl)methyl)-1-methylpyridinium iodide (**4**)

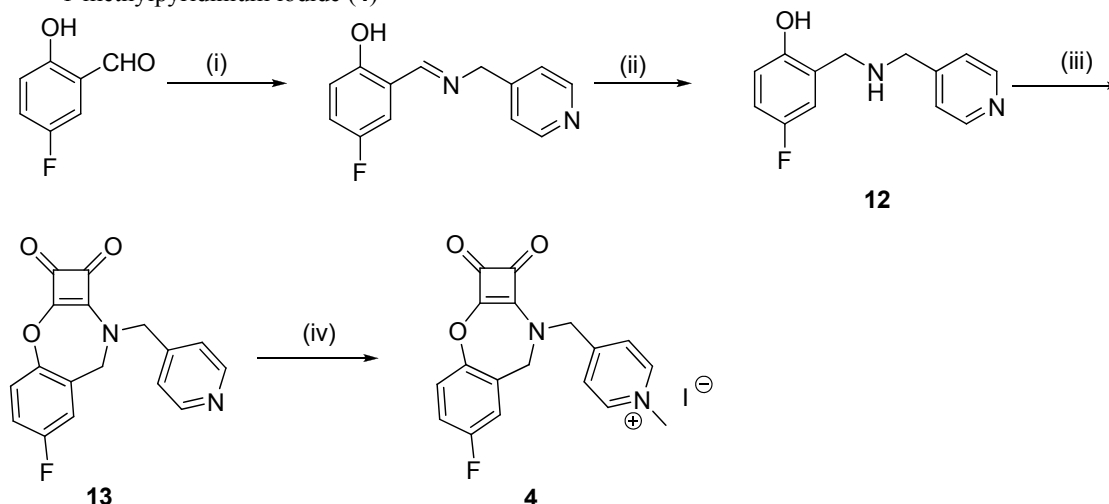

Reagents and conditions: (i) 4-aminomethyl pyridine, EtOH, r.t. 1hr; (ii)  $\text{NaBH}_4$ , EtOH,  $0^\circ\text{C}$  to r.t., 1hr; (iii) 3,4-dichlorocyclobutene-1,2-dione, TEA, benzene,  $0^\circ\text{C}$  to reflux, 16hr; (iv)  $\text{CH}_3\text{I}$ ,  $\text{CH}_2\text{Cl}_2$ , r.t., 16hr

(1) Synthesis of 4-fluoro-2-((pyridin-4-ylmethylamino)methyl)phenol (**12**)

A mixture of aldehyde (10mmol) and amine (1eq) in EtOH (10mL) was stirred at r.t. for 2hr. The mixture was then cooled to  $0^\circ\text{C}$  and  $\text{NaBH}_4$  (1.2 eq) was added in portions. The mixture was then stirred at that temp. for 2hr. The reaction solution was quenched by water at  $0^\circ\text{C}$  and concentrated. The residue was extracted by DCM. The organic layers were combined, dried and concentrated. The residue was purified by flash chromatography using DCM:MeOH (20:1) as eluent to give a colorless sticky oil. Yield 1.44g (65%).  $^1\text{H NMR}$  (300 MHz,  $\text{DMSO-d}_6$ ):  $\delta$  8.50 (d,  $J=6\text{Hz}$ , 2H), 7.35 (d,  $J=6\text{Hz}$ , 2H), 7.03 (dd,  $J=9, 3\text{Hz}$ , 1H), 6.89 (m, 1H), 6.74-6.69 (m, 1H), 3.73 (s, 2H), 3.70 (s, 2H).

(3) Synthesis of 6-fluoro-9-((pyridin-4-ylmethyl)-8,9-dihydrobenzo[f]cyclobuta[b][1,4]-oxazepine-1,2-dione (**13**)

1,2-Dichlorocyclobutene-3,4-dione (0.6g) was dissolved in dry benzene (40mL) and cooled down to  $0^\circ\text{C}$  under argon atmosphere. 1 eq of phenol in anhydrous benzene (30 mL) was added dropwise, accompanied by addition of excess of triethyl amine (2.2eq) in anhydrous benzene (30 mL). Reaction mixture was stirred at  $0^\circ\text{C}$  for 0.5hr, at r.t. for 0.5hr and at reflux overnight. The reaction mixture was then filtered and concentrated. Flash chromatography using PE (100mL), DCM (100mL), DCM:MeOH (100:1, 200mL), DCM:MeOH (80:1, 200mL), DCM:MeOH (60:1) as eluent afforded a brown sticky oil, which was dried under high vacuum to give a foamy solid. Yield 0.31g (25%). HRMS  $m/z$ : cacl. for  $[M+H]^+$ : 311.0832, found: 311.0822;  $^1\text{H NMR}$  (300 MHz,  $\text{DMSO-d}_6$ ):  $\delta$  8.59-8.58 (m, 2H), 7.46-7.26 (m, 5H), 4.98 (s, 2H), 4.66 (s, 2H).

(3) Synthesis of 4-((6-fluoro-1,2-dioxo-1,2-dihydrobenzo[f]cyclobuta[b][1,4]oxazepin-9(8H)-yl)methyl)-1-methylpyridinium iodide (**4**)

A mixture of 6-fluoro-9-((pyridin-4-ylmethyl)-8,9-dihydrobenzo[f]cyclobuta[b][1,4]-oxazepine-1,2-dione (20mg) and iodomethane (excess) in anhydrous DCM (0.4mL) was stirred at r.t. overnight. The mixture was filtered and the solid was washed with large amount of DCM, dried under high vacuum to give a pale white solid with rather good water solubility. Yield: 18.8 mg (90%). HRMS  $m/z$ : cacl. for  $[M+H-I]^+$ : 325.0988, found: 325.0996;  $^1\text{H NMR}$  (300 MHz,  $\text{DMSO-d}_6$ ):  $\delta$  8.97 (m, 2H), 8.13-8.11 (m, 2H), 7.50-7.23 (m, 3H), 5.15 (s, 2H), 4.72 (s, 2H), 4.33 (3H).  $^{13}\text{C NMR}$  (75MHz,  $\text{DMSO-d}_6$ ):  $\delta$  188.33, 181.08, 175.32, 173.72, 159.47, 156.26, 155.05, 150.82, 150.78, 145.68, 126.02, 125.62, 125.51, 122.59, 122.48, 118.58, 118.26, 117.47, 117.16, 53.02, 52.71, 47.72.

1.4 Synthesis of 4-((4,6-difluoro-1,2-dioxo-1,2-dihydrobenzo[f]cyclobuta[b][1,4]-oxazepin-9(8H)-yl)-methyl)-1-methylpyridinium iodide **5**

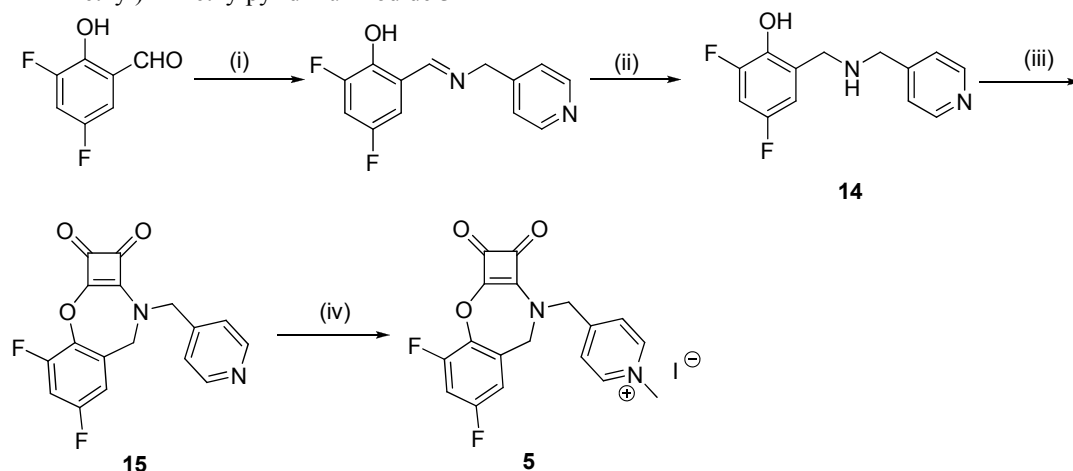

Reagents and conditions: (i) 4-aminomethyl pyridine, EtOH, r.t. 1hr; (ii) NaBH<sub>4</sub>, EtOH, 0°C to r.t., 1hr; (iii) 3,4-dichlorocyclobutene-1,2-dione, TEA, benzene, 0°C to reflux, 16hr; (iv) CH<sub>3</sub>I, CH<sub>2</sub>Cl<sub>2</sub>, r.t., 16hr

(1) Synthesis of 4,6-difluoro-2-((pyridin-4-ylmethylamino)methyl)phenol (**14**)

A mixture of aldehyde (10mmol) and amine (1eq) in EtOH (10mL) was stirred at r.t. for 2hr. The mixture was then cooled to 0°C and NaBH<sub>4</sub> (1.2 eq) was added in portions. The mixture was then stirred at that temp. for 2hr. The reaction solution was quenched by water at 0°C and concentrated. The residue was extracted by DCM. The organic layers were combined, dried and concentrated. The residue was purified by flash chromatography using DCM:MeOH (20:1) as eluent to give a colorless sticky oil. Yield 1.63g (65%). <sup>1</sup>HNMR (300 MHz, DMSO-d<sub>6</sub>) : δ 8.61 (d, *J* = 4 Hz, 2H), 7.27-6.84 (m, 2H), 6.84-6.76 (m, 1H), 6.56-6.53 (m, 1H), 4.04 (s, 3H), 3.85 (s, 3H).

(2) Synthesis of 4,6-difluoro-9-(pyridin-4-ylmethyl)-8,9-dihydrobenzo[f]cyclobuta-[b][1,4]oxazepine-1,2-dione (**15**)

1,2-Dichlorocyclobutene-3,4-dione (0.6g) was dissolved in dry benzene (40mL) and cooled down to 0 °C under argon atmosphere. 1 eq of phenol in anhydrous benzene (30 mL) was added dropwise, accompanied by addition of excess of triethyl amine (2.2eq) in anhydrous benzene (30 mL). Reaction mixture was stirred at 0°C for 0.5hr, at r.t. for 0.5hr and at reflux overnight. The reaction mixture was then filtered and concentrated. Flash chromatography using PE (100mL), DCM (100mL), DCM:MeOH (100:1, 200mL), DCM:MeOH (80:1, 200mL), DCM:MeOH (60:1) as eluent afforded a brown sticky oil, which was dried under high vacuum to give a foamy solid. Yield 0.33g (25%). HRMS *m/z*: cacl. for [M+H]<sup>+</sup>: 329.0738, found: 329.0737; <sup>1</sup>HNMR (300 MHz, DMSO-d<sub>6</sub>) : δ 8.70-8.69 (m, 2H), 7.27-7.23 (m, 2H), 7.08-7.01 (m, 1H), 6.64-6.60 (m, 1H), 4.94 (s, 2H), 4.74 (s, 2H).

(3) Synthesis of 4-((4,6-difluoro-1,2-dioxo-1,2-dihydrobenzo[f]cyclobuta[b][1,4]-oxazepin-9(8H)-yl)-methyl)-1-methylpyridinium iodide (**5**)

A mixture of 6-fluoro-9-(pyridin-4-ylmethyl)-8,9-dihydrobenzo[f]cyclobuta[b][1,4]-oxazepine-1,2-dione (20mg) and iodomethane (excess) in anhydrous DCM (0.4mL) was stirred at r.t. for overnight. The mixture was filtered and the solid was washed with large amount of DCM, dried under high vacuum to give a pale white solid with rather good water solubility. Yield : 19mg (90%). HRMS *m/z*: cacl. for [M+H-I]<sup>+</sup>: 343.0894, found: 343.0903; <sup>1</sup>HNMR (300 MHz, DMSO-d<sub>6</sub>) : δ 8.98 (d, *J* = 4Hz, 2H), 8.12 (d, *J* = 4Hz, 2H), 7.67-7.60 (m, 1H), 7.15-7.11 (m, 1H), 5.16 (s, 2H), 4.78 (s, 2H), 4.33 (3H). <sup>13</sup>CNMR (75MHz, DMSO-d<sub>6</sub>) : δ 188.37, 180.68, 175.31, 172.86, 158.61, 158.45, 155.37, 155.20, 155.03, 153.80, 150.49, 150.31, 145.67, 139.74, 139.69, 139.58, 139.52, 127.13, 127.00, 125.92, 113.82, 113.77, 113.49, 113.45, 106.54, 106.23, 106.18, 105.87, 53.00, 52.83, 47.68.

1.5 Synthesis of 9-(4-(2-(2-(2-methoxyethoxy)ethoxy)ethoxy)phenyl)-8,9-dihydrobenzo[f]cyclobuta[b][1,4]oxazepine-1,2-dione (**6**)

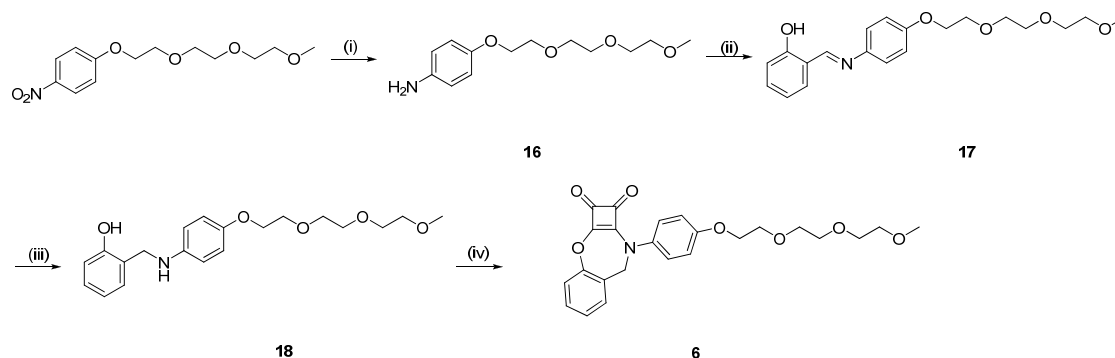

Reagents and conditions: (i) Pd/C, H<sub>2</sub>, MeOH; (ii) salicy aldehyde, EtOH, r.t. 1hr; (iii) NaBH<sub>4</sub>, EtOH, 0°C to r.t., 1hr; (iv) 3,4-dichlorocyclobutene-1,2-dione, TEA, benzene, 0°C to reflux, 16hr.

(1) Synthesis of 4-(2-(2-(2-methoxyethoxy)ethoxy)ethoxy)aniline (**16**)

A mixture of **1** (10 mmol) and 10% Pd/C (10%wt) in MeOH (50 mL) was hydrogenated at room temperature under a hydrogen balloon, with vigorous stirring, overnight. The catalyst was filtered through Celite, and the filtrate was concentrated to give a brown sticky oil. The oil was used directly for the next step without further purification.

(2) Synthesis of 2-((4-(2-(2-(2-methoxyethoxy)ethoxy)ethoxy)phenylamino)methyl)phenol (**18**)

A mixture of aldehyde (10mmol) and amine (1eq) in EtOH was stirred at r.t. for 2hr. The mixture was cooled to 0°C and NaBH<sub>4</sub> (1.2eq) was added in portions. The mixture was then stirred at that temp. for 2hr. The reaction was solution was quenched by water and concentrated. The residue was extracted by DCM. The organic layers were combined, dried and concentrated to give a brown sticky oil. The oil was used directly for the next step without further purification.

(3) Synthesis of 9-(4-(2-(2-(2-methoxyethoxy)ethoxy)ethoxy)phenyl)-8,9-dihydrobenzo[f]cyclobuta[b][1,4]-oxazepine-1,2-dione (**6**)

1,2-Dichlorocyclobutene-3,4-dione (0.6g) was dissolved in dry benzene (50mL) and cooled down to 0 °C under argon atmosphere. 1 eq of phenol in anhydrous benzene (5mL) was added dropwise, accompanied by addition of excess of triethyl amine (2.2eq) in anhydrous benzene (5mL). Reaction mixture was stirred at 0°C for 0.5hr, at r.t. for 0.5hr and at reflux overnight. Flash chromatography using Hexanes:EtOAc (1:1) as eluent afforded a yellow sticky oil, which was dried under high vacuum to give semi solid. Total yield (three steps): 52.7%. HRMS *m/z*: cacl.: 440.1709 [M+H]<sup>+</sup>, found: 440.1700; <sup>1</sup>HNMR (300 MHz, CDCl<sub>3</sub>) : δ 7.50-7.15 (m, 6H), 6.98 (d, *J* = 9.0 Hz, 2H), 4.99 (s, 2H), 4.16-4.14 (m, 2H), 3.89-3.86 (m, 2H), 3.76-3.57 (m, 8H), 3.39 (s, 3H).

1.6 Synthesis of 9-(2-(2-(2-hydroxyethoxy)ethyl)-8,9-dihydrobenzo[f]cyclobuta[b][1,4]-oxazepine-1,2-dione (**7**)

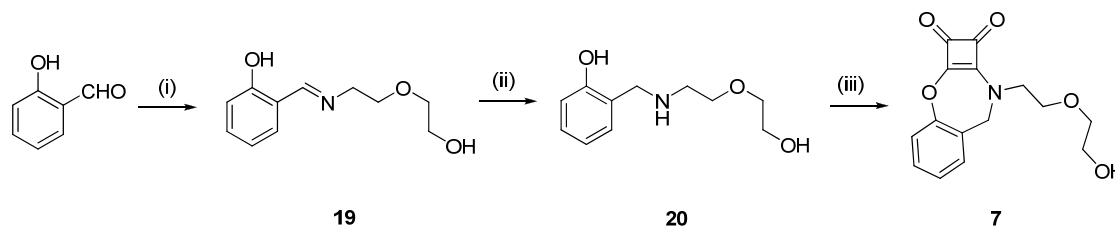

(1) Synthesis of 2-((2-(2-(2-hydroxyethoxy)ethyl)amino)methyl)phenol (**20**)

A mixture of aldehyde (10mmol) and amine (1eq) in EtOH was stirred at r.t. for 2hr. The mixture was cooled to 0°C and NaBH<sub>4</sub> (1.2eq) was added in portions. The mixture was then stirred at that temp. for 2hr. The reaction was solution was quenched by water and concentrated. The residue was extracted by DCM. The organic layers were combined, dried and concentrated to give a yellow sticky oil. The oil was used directly for the next step without further purification.

(2) Synthesis of 9-(2-(2-(2-hydroxyethoxy)ethyl)-8,9-dihydrobenzo[f]cyclobuta[b][1,4]-oxazepine-1,2-dione (**7**)

1,2-Dichlorocyclobutene-3,4-dione (0.6g) was dissolved in dry benzene (50mL) and cooled down to 0 °C under argon atmosphere. 1 eq of phenol in anhydrous benzene (5mL) was added dropwise, accompanied by addition of excess of triethyl amine (2.2eq) in anhydrous benzene (5mL). Reaction mixture was stirred at 0°C for 0.5hr, at r.t. for 0.5hr and at reflux overnight. Flash chromatography using Hexanes:EtOAc (1:1) as eluent afforded a yellow sticky oil. Total yield (two steps): 23.1%. HRMS m/z (%): cacl.: 290.1023 [M+H]<sup>+</sup>, found: 290.1026; <sup>1</sup>HNMR (300 MHz, CDCl<sub>3</sub>): δ 7.42-6.89 (m, 4H), 4.68 (s, 2H), 3.96-3.56 (m, 8H).

## 2. Ligation of cyclic squarate derivative **3** with L-cysteine and L-cysteine ethyl ester

**Table S1.** Ligation of cyclic squarate derivative **3** with L-cysteine and L-cysteine ethyl ester (Scheme 1).<sup>a</sup>

| Entry | Reactant | Product | Time (Conv >95%) |
|-------|----------|---------|------------------|
| 1     |          |         | 5 min            |
| 2     |          |         | 5 min            |

<sup>a</sup>Reaction conditions: H<sub>2</sub>O, r.t.

## 3. UV spectra of **3**, NHS-Biotin and SQ-Biotin

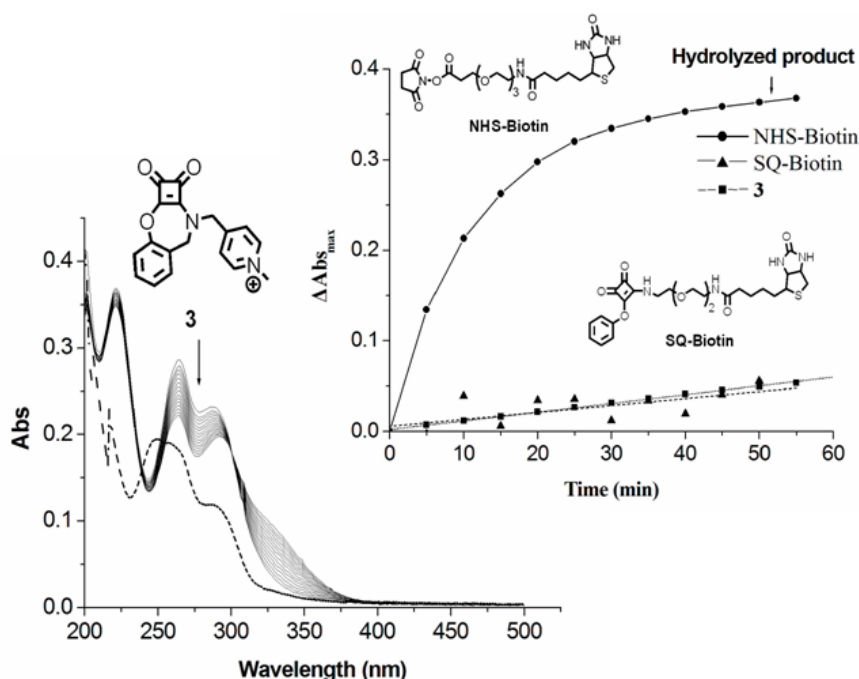

**Fig1** UV spectra of 10 μM of **3** in PBS buffer (10 mM, pH 8.02) at increment of 5 min from 0 to 70 min (solid line), and in CH<sub>3</sub>CN (dash line). The insert shows the plot of (Abs<sub>max(0 min)</sub>-Abs<sub>max(t)</sub>) at 264 nm of **3**, NHS-Biotin and SQ-Biotin versus time in PBS buffer (10 mM, pH 8.02).

4. The Maldi-Tof spectra for the ligation of the proteins using squarate pyridium salts.

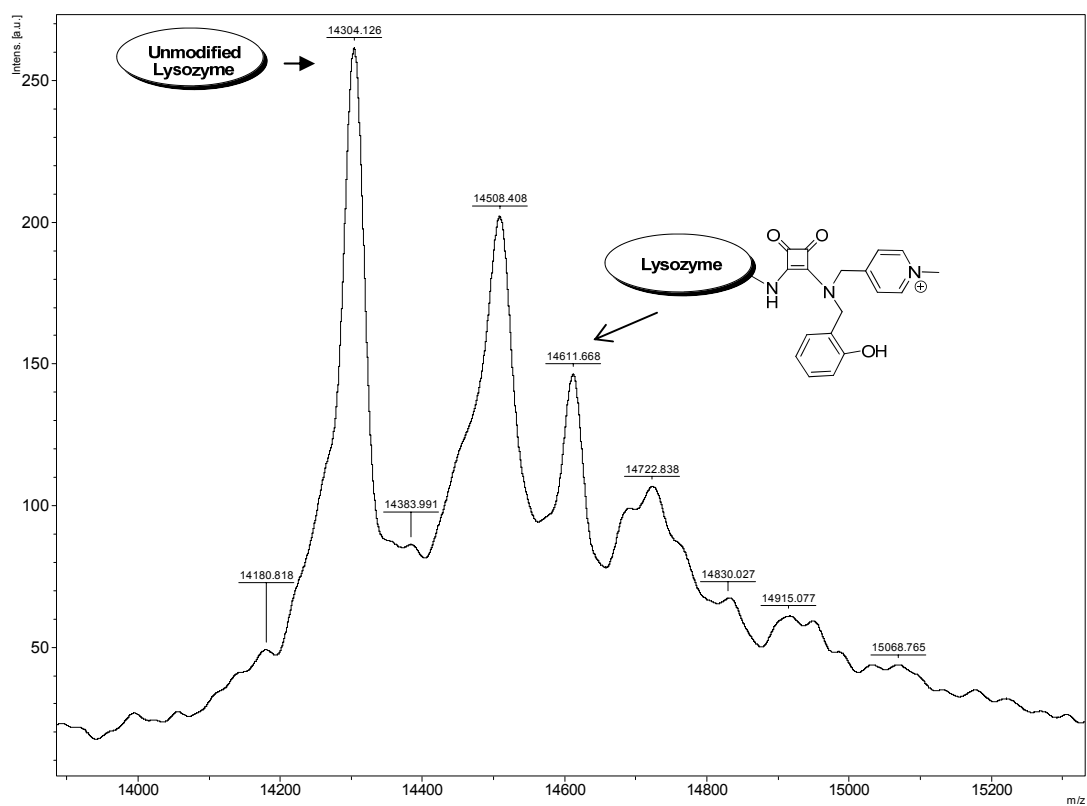

**Figure 2.** The spectrum of Maldi-Tof of modified Lysozyme by **3** at pH 7.75 in 10mM PBS buffer.



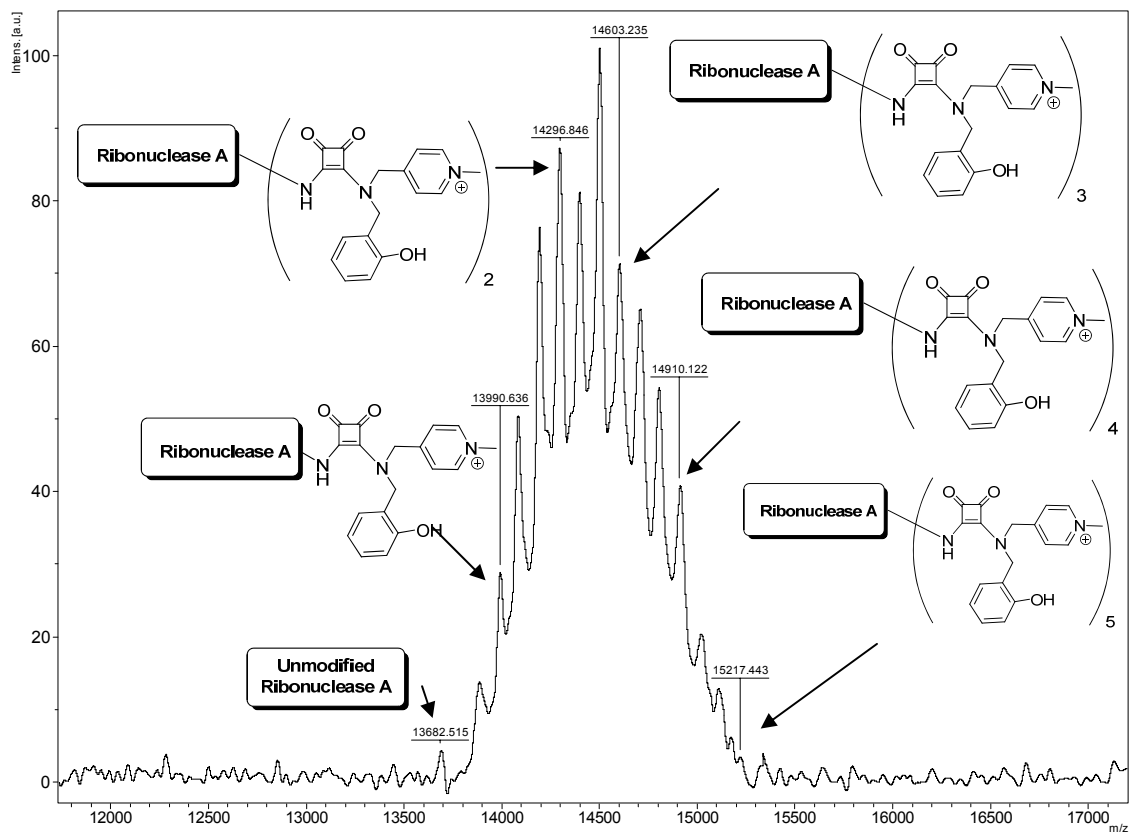

**Figure 3.** The spectrum of Maldi-Tof of modified Ribonuclease A by **3** at pH 7.75 in 10mM PBS buffer.

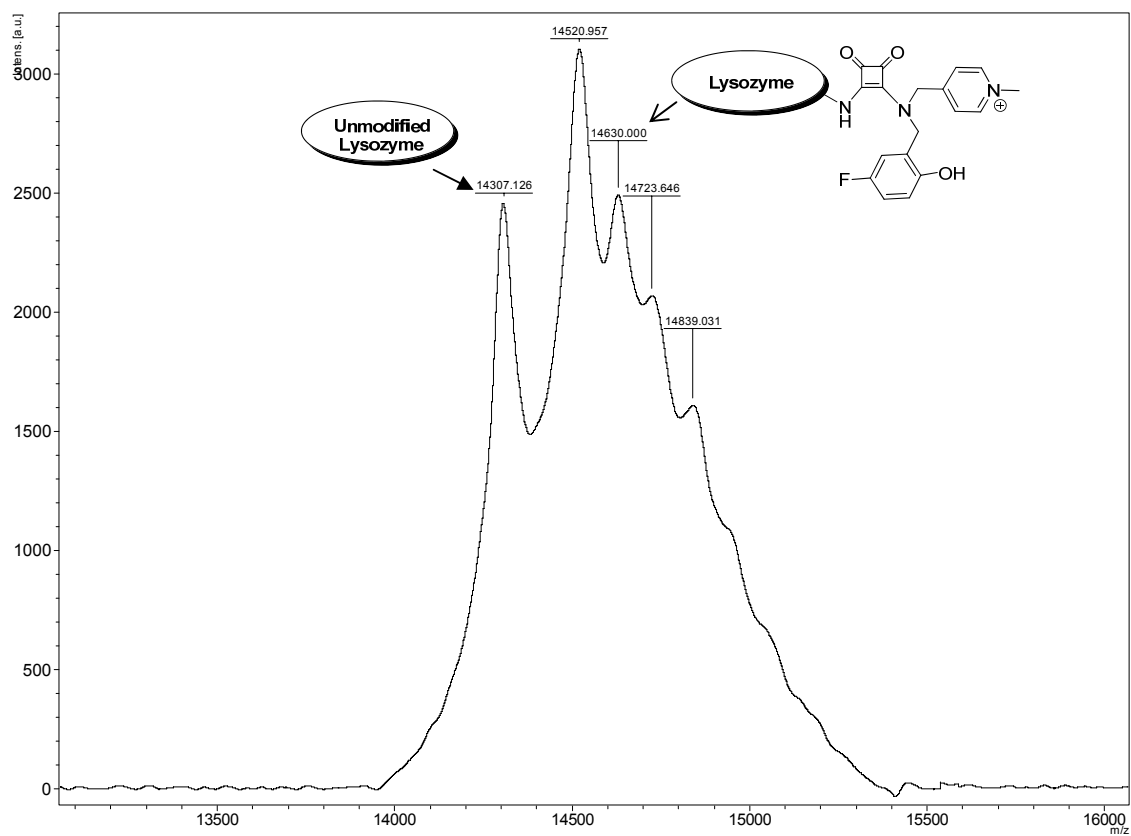

**Figure 4.** The spectrum of Maldi-ToF of modified Lysozyme by **4** at pH 7.75 in 10mM PBS buffer.

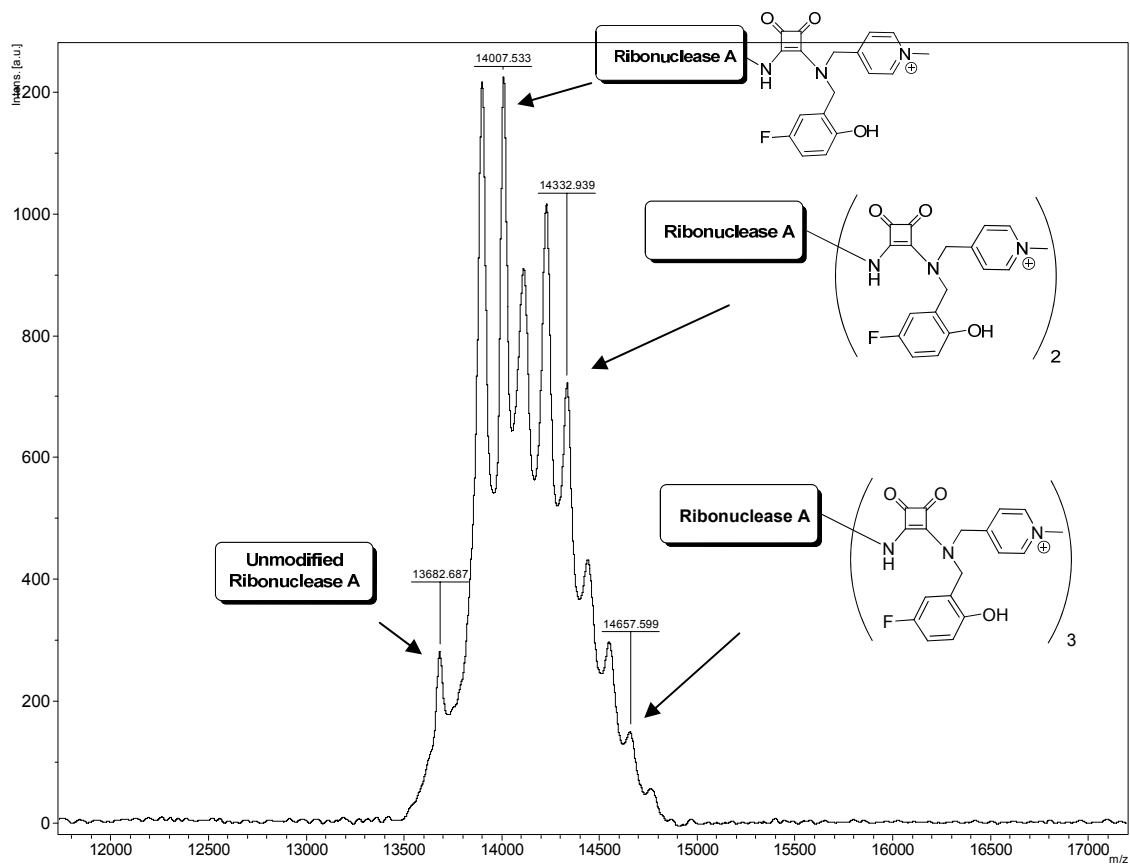

**Figure 5.** The spectrum of Maldi-ToF of modified Ribonuclease A by 4 at pH 7.75 in 10mM PBS buffer.

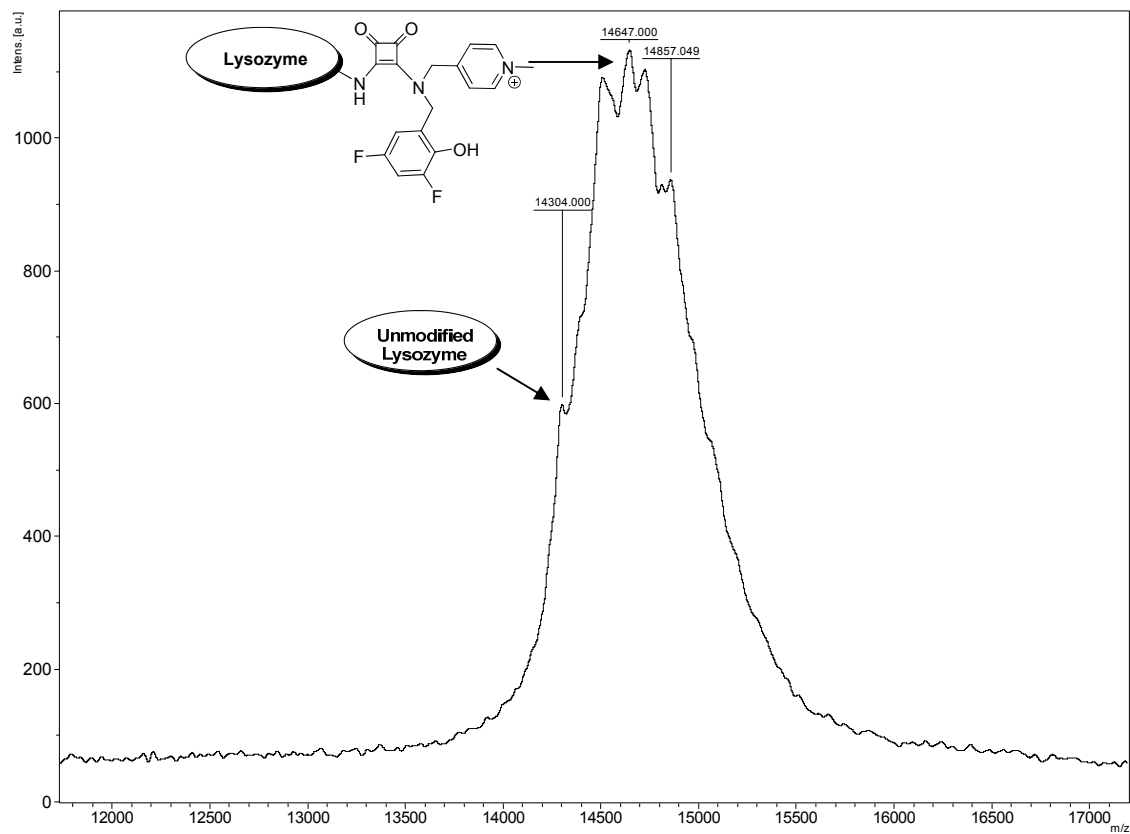

**Figure 6.** The spectrum of Maldi-ToF of modified Lysozyme by **5** at pH 7.75 in 10mM PBS buffer.

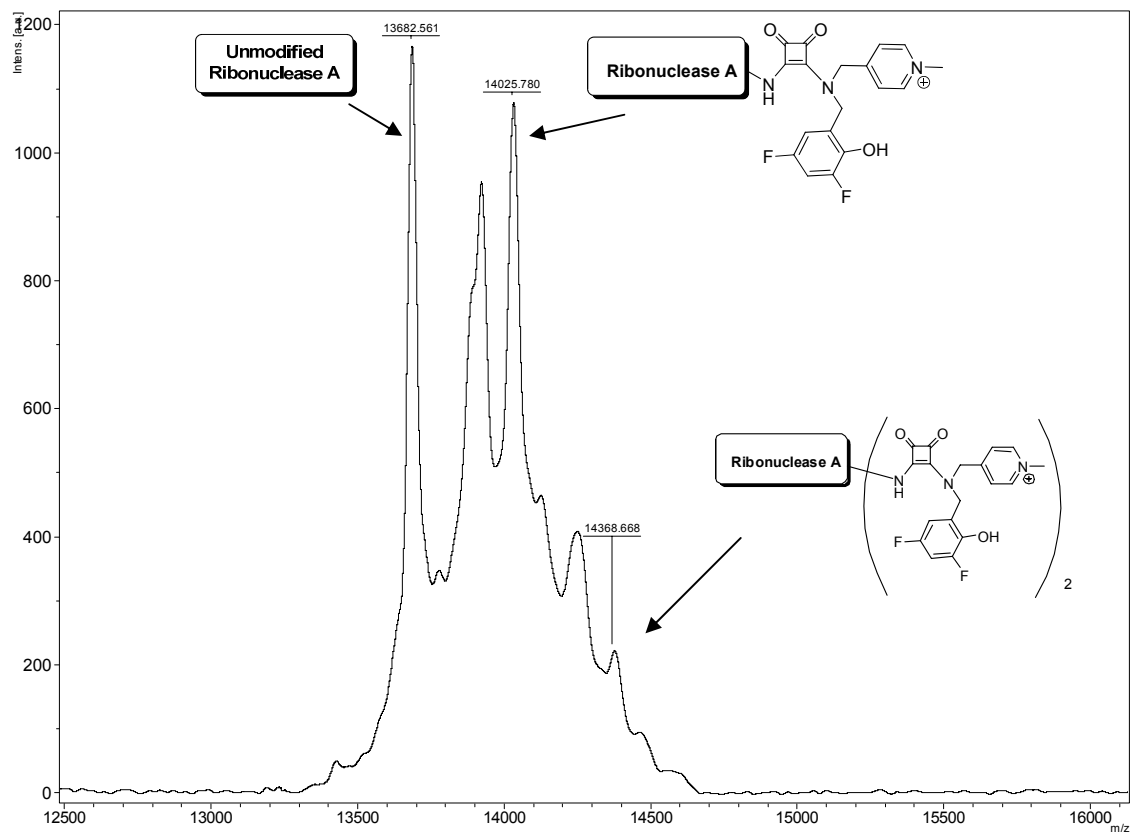

**Figure 7.** The spectrum of Maldi-ToF of modified Ribonuclease A by **5** at pH 7.75 in 10mM PBS buffer.

File : C:\MSDCHEM\1\Default\Data\BSB\DC-1-39-101.D This journal is (c) The Royal Society of Chemistry 2011  
Operator : amh  
Acquired : 11 Dec 2009 11:30 using AcqMethod 00\_GEN 30\_1 SPLIT ALS\_INJ\_EI 40C 40\_500DA.M  
Instrument : Instrument #1  
Sample Name: dc-1-39-101  
Misc Info :  
Vial Number: 11

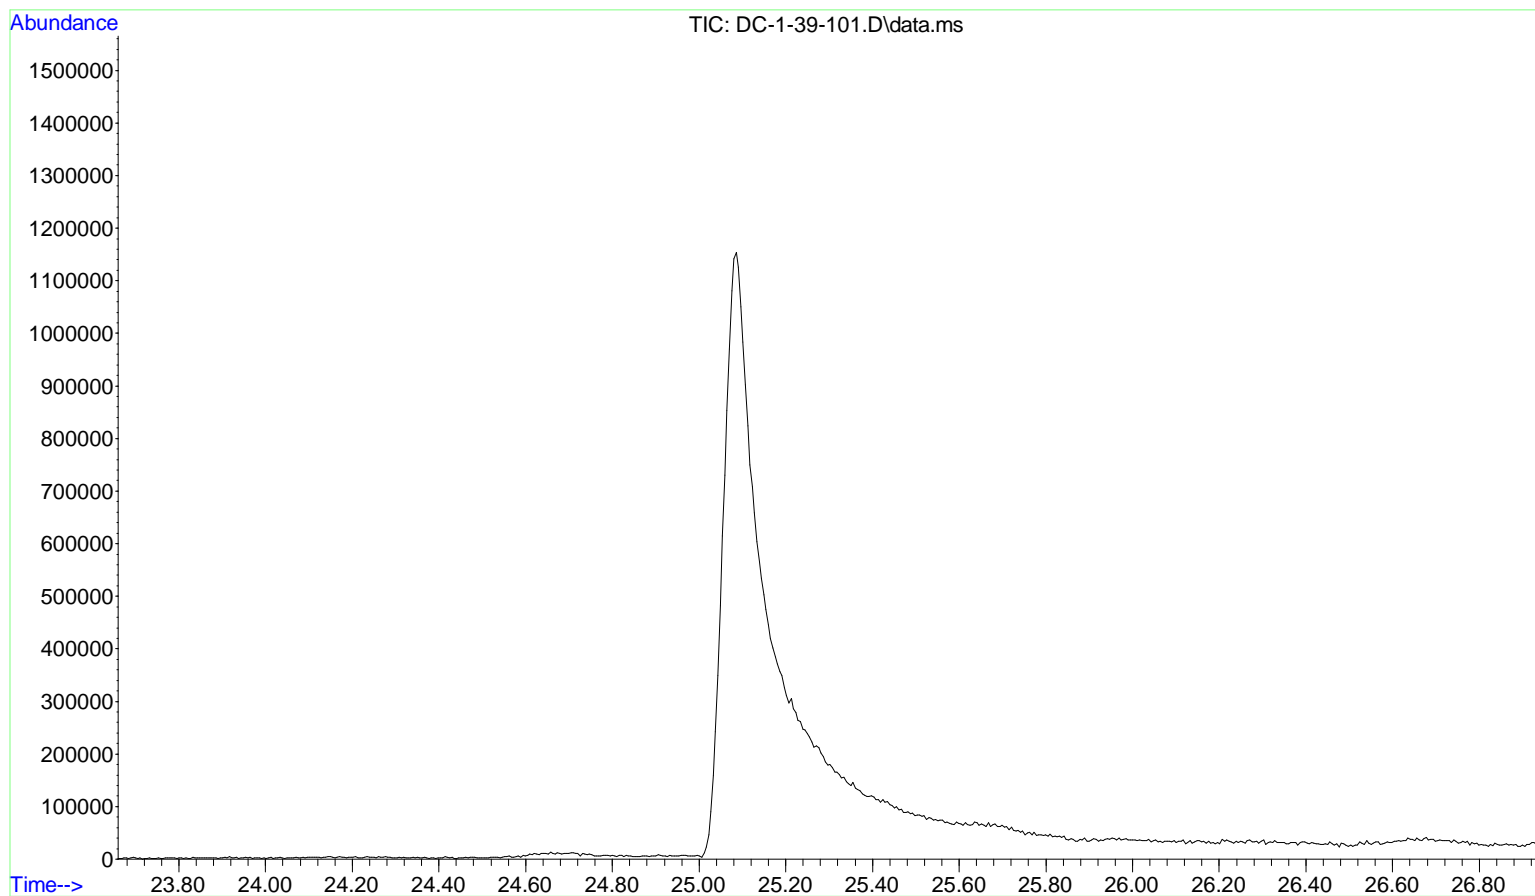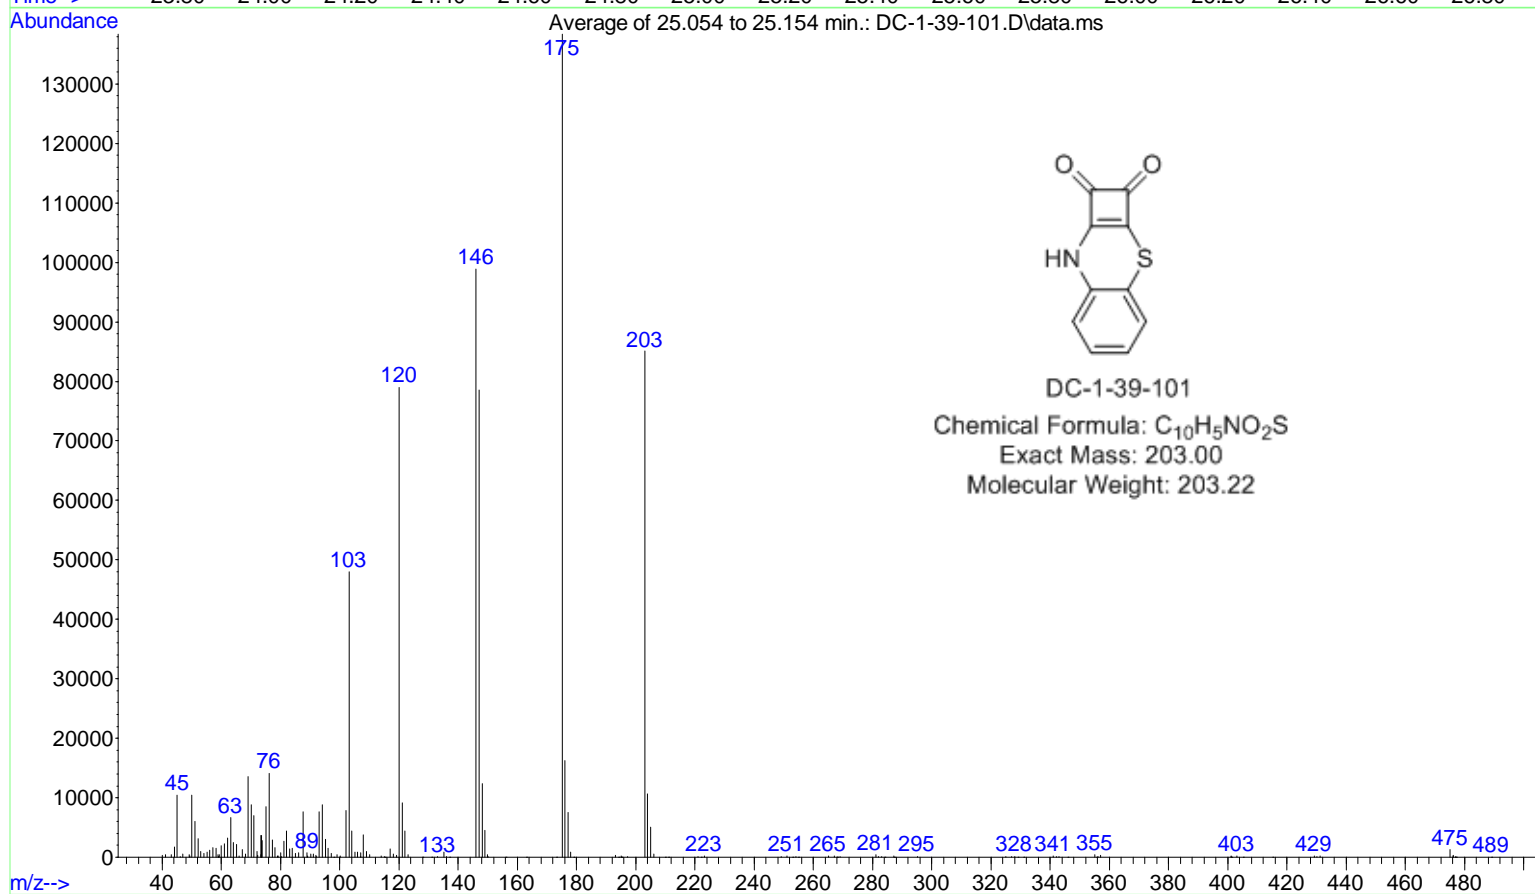

7.360  
7.091  
7.084  
7.069  
7.065  
7.062  
7.058  
7.043  
7.035  
7.006  
6.987  
6.980  
6.961  
6.954  
6.950  
6.932  
6.928  
6.925  
6.906  
6.902  
6.744  
6.740  
6.718  
6.713

3.326  
3.098  
3.073  
3.049  
2.507  
2.502  
2.495  
2.489  
2.483  
1.191  
1.167  
1.143

dc-1-39-101

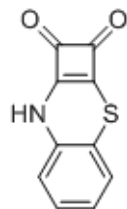

DC-1-39-101

Chemical Formula: C<sub>10</sub>H<sub>5</sub>NO<sub>2</sub>S  
 Exact Mass: 203.00  
 Molecular Weight: 203.22

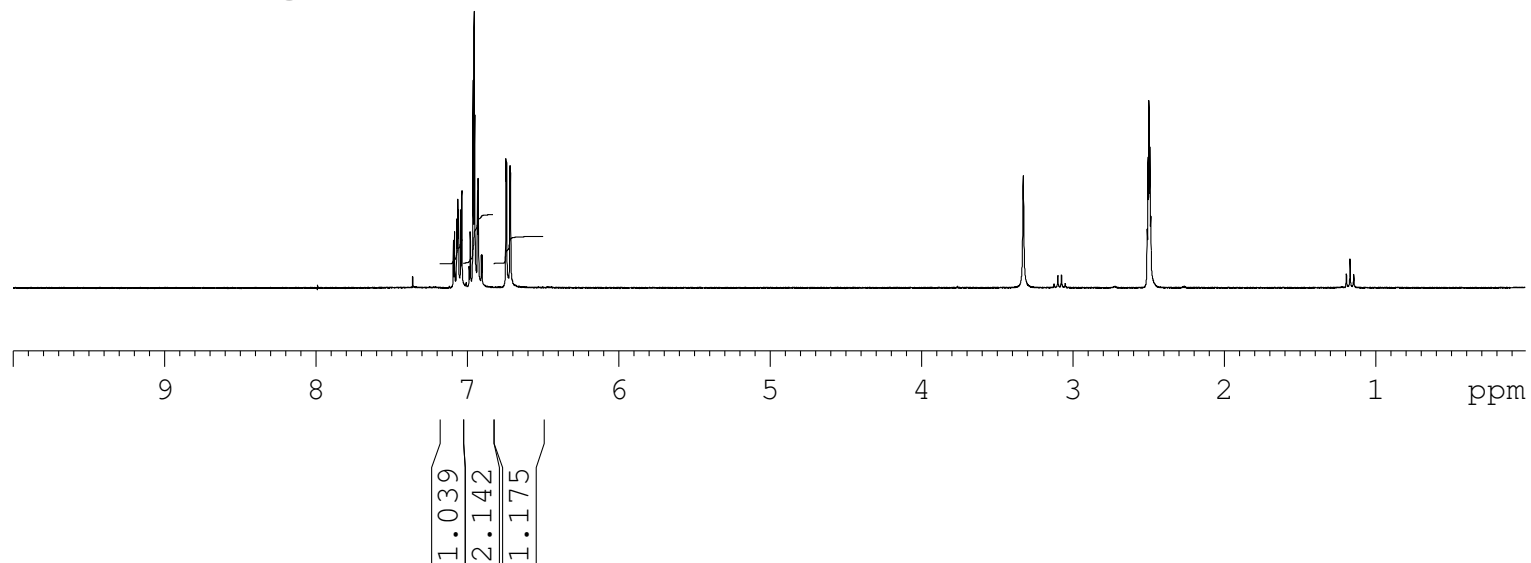

Current Data Parameters

NAME dc-1-39-101  
 EXPNO 1  
 PROCNO 1

F2 - Acquisition Parameters

Date\_ 20100622  
 Time 17.43  
 INSTRUM spect  
 PROBHD 5 mm QNP 1H/1  
 PULPROG zg  
 TD 32768  
 SOLVENT DMSO  
 NS 16  
 DS 0  
 SWH 4789.272 Hz  
 FIDRES 0.146157 Hz  
 AQ 3.4210291 sec  
 RG 812.7  
 DW 104.400 usec  
 DE 54.00 usec  
 TE 296.2 K  
 D1 1.00000000 sec  
 TD0 1

===== CHANNEL f1 =====

NUC1 1H  
 P1 9.75 usec  
 PL1 0.00 dB  
 SFO1 300.1324000 MHz

F2 - Processing parameters

SI 32768  
 SF 300.1300024 MHz  
 WDW no  
 SSB 0  
 LB 0.00 Hz  
 GB 0  
 PC 1.00

DC-1-39-101

DMSO-d<sub>6</sub>

183.846  
183.388  
179.656

164.621

134.487  
129.571  
128.394  
126.637

119.138  
115.033

40.342  
40.065  
39.788  
39.510  
39.233  
38.954  
38.676

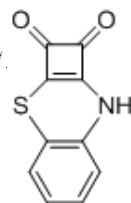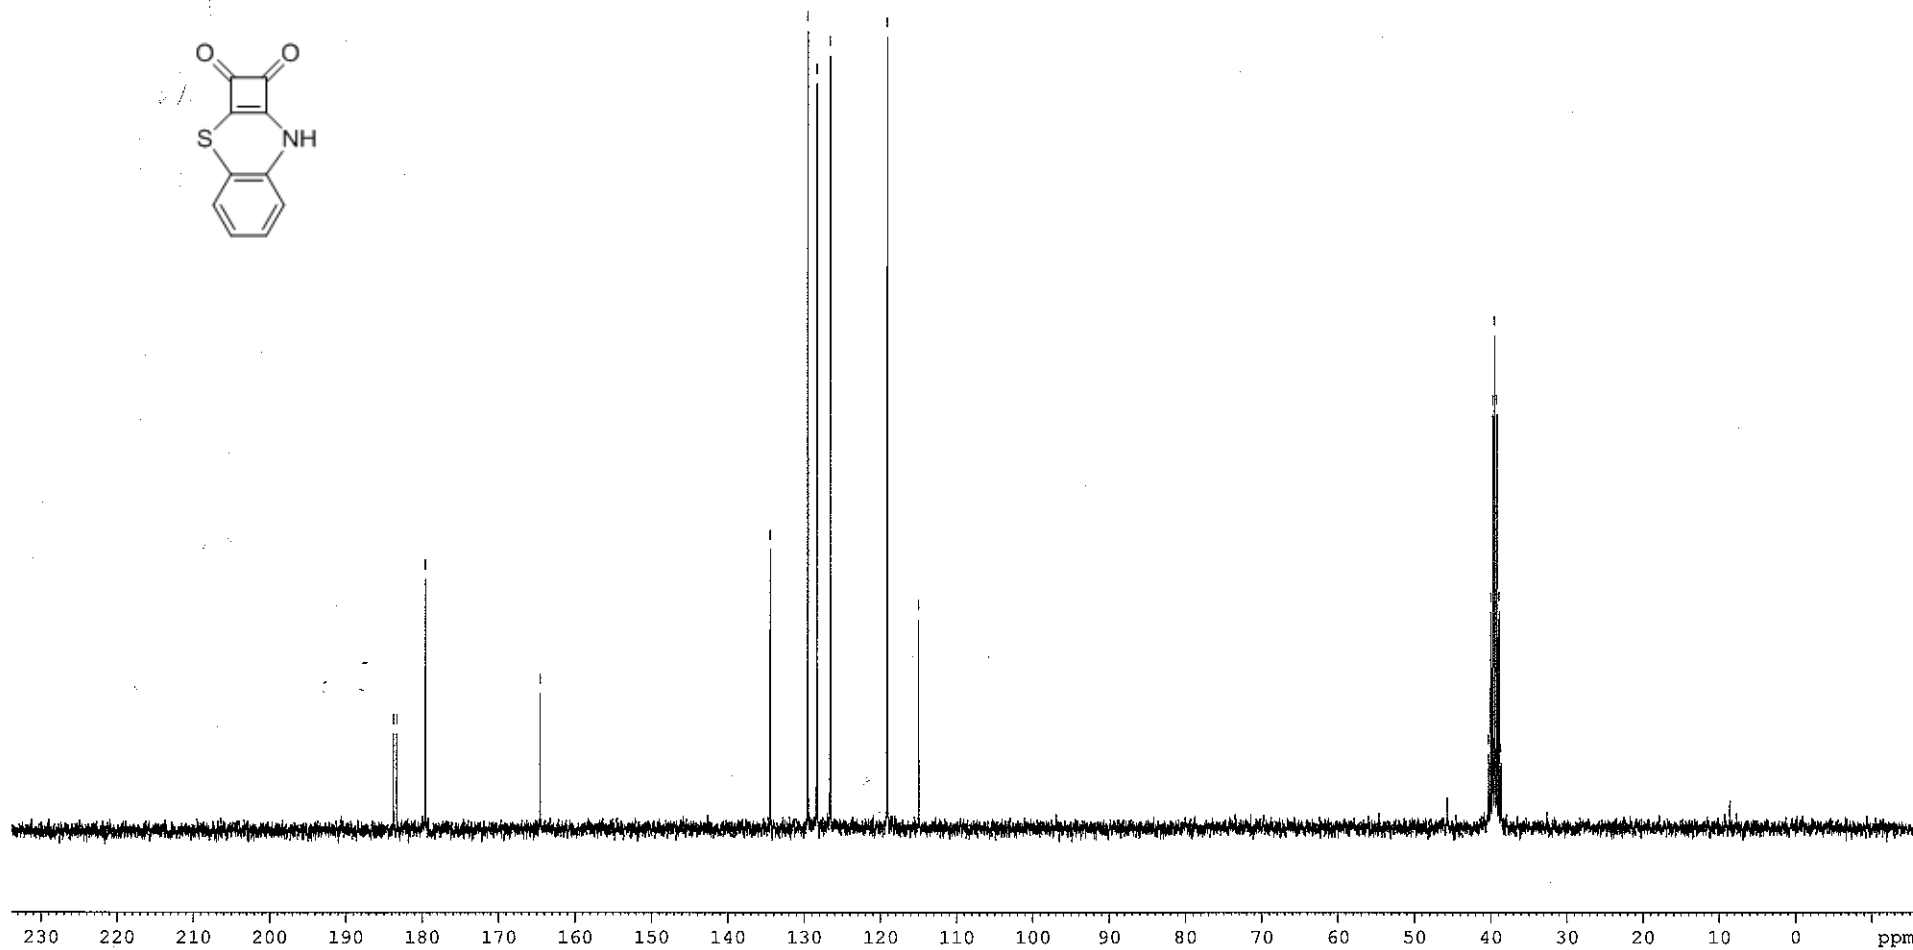



Sample Name : dc-1-48-101

=====  
Acq. Operator : Angela Hansen  
Acq. Instrument : INSTRUMENT 1 Location : Vial 2  
Injection Date : 12/17/2009 12:23:56 PM Inj : 1  
Inj Volume : 10 µl  
Acq. Method : D:\METHODS\POS\_MIXED\_LOOP\_150\_  
Last changed : 12/17/2009 12:23:35 PM by Angela Hansen  
(modified after loading)  
Analysis Method : D:\METHODS\16MIN\_150\_1000\_LCMS\_BOTH\_POS.M  
Last changed : 12/15/2009 2:38:59 PM by David Dye  
(modified after loading)  
Method Info : Method for loop analysis of small organics  
Sample Info : test  
Easy-Access Method: 'pos\_mixed\_loop\_150\_1000'  
Database #:

## MS Spectrum

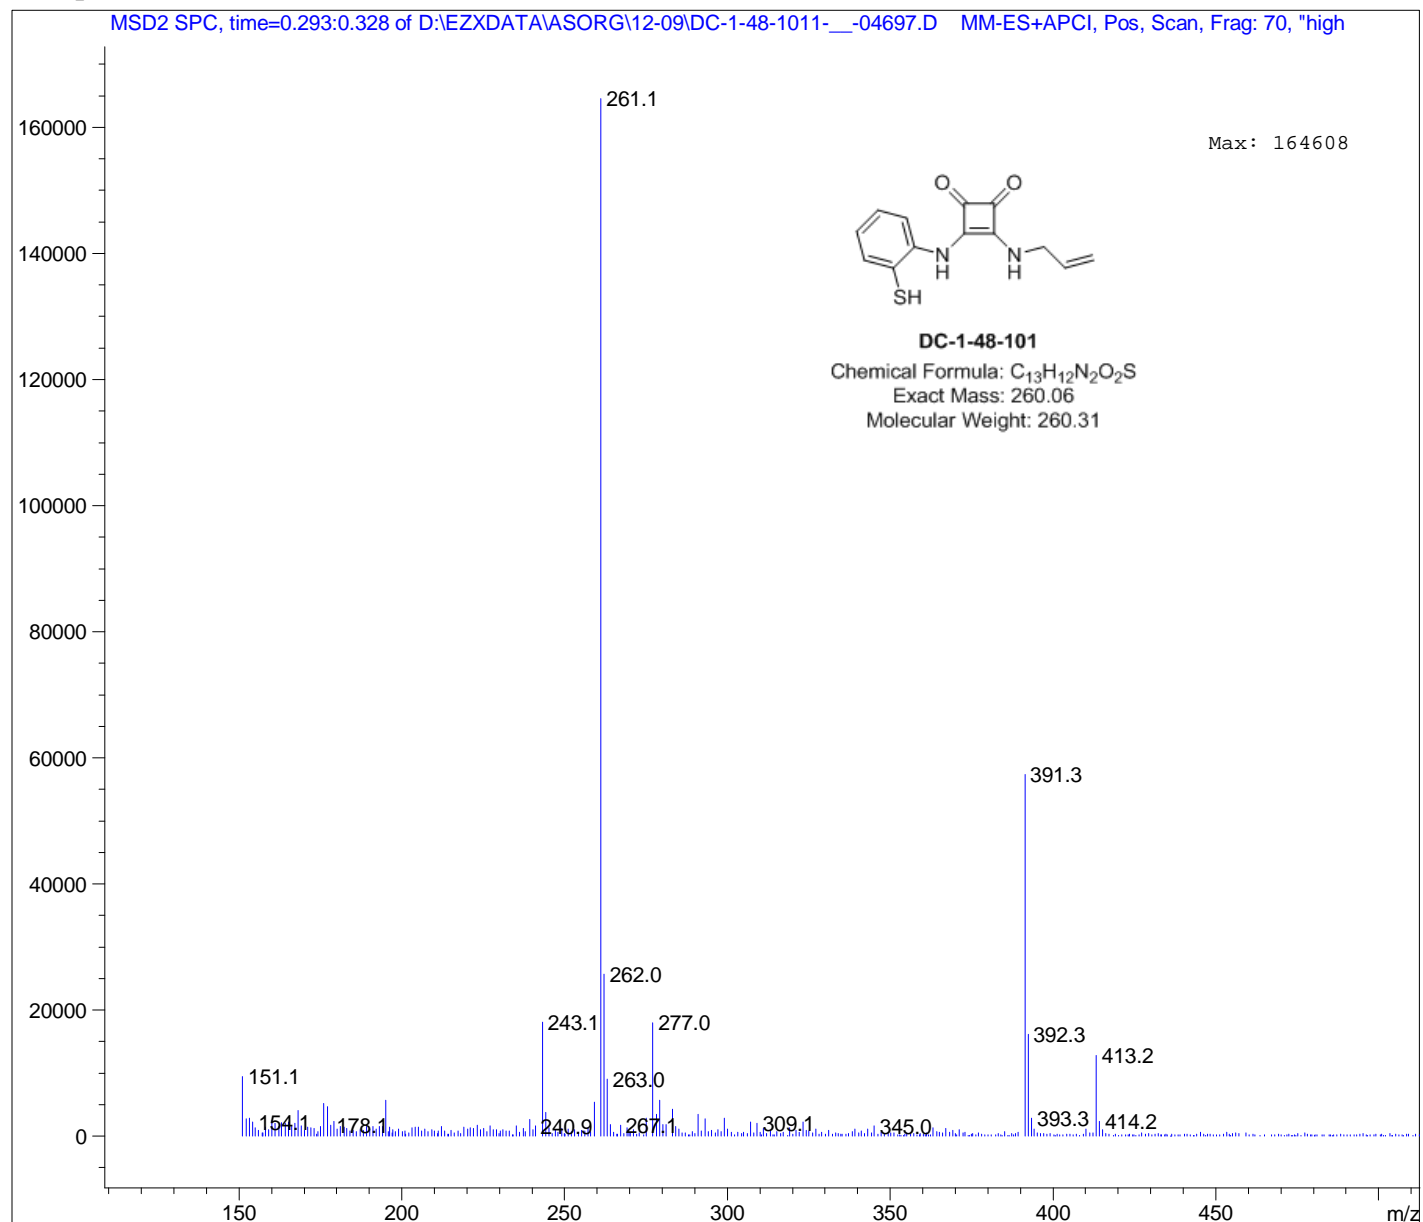

8.68  
 8.69  
 6.88  
 6.86  
 6.85  
 6.83  
 6.83  
 6.80  
 6.80  
 6.78  
 6.78  
 6.77  
 6.76  
 6.74  
 6.55  
 6.55  
 6.53  
 6.52  
 5.77  
 5.74  
 5.11  
 5.10  
 5.06  
 5.05  
 5.05  
 5.04  
 5.02  
 5.02  
 3.73  
 3.73  
 3.72  
 3.71  
 3.70  
 3.69  
 3.68  
 3.31  
 2.50  
 2.49  
 2.48  
 2.48  
 2.47

Current Data Parameters  
 NAME dc-1-48-101dms0  
 EXPNO 1  
 PROCNO 1

F2 - Acquisition Parameters  
 Date\_ 20091221  
 Time 12.08  
 INSTRUM spect  
 PROBHD 5 mm QNP 1H/1  
 PULPROG zg  
 TD 32768  
 SOLVENT DMSO  
 NS 16  
 DS 0  
 SWH 3591.954 Hz  
 FIDRES 0.109618 Hz  
 AQ 4.5613556 sec  
 RG 574.7  
 DW 139.200 usec  
 DE 54.00 usec  
 TE 298.2 K  
 D1 1.00000000 sec  
 TD0 1

dc-1-48-101dms0

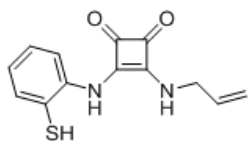

**DC-1-48-101**

Chemical Formula: C<sub>13</sub>H<sub>12</sub>N<sub>2</sub>O<sub>2</sub>S  
 Exact Mass: 260.06  
 Molecular Weight: 260.31

==== CHANNEL f1 =====  
 NUC1 1H  
 P1 9.75 usec  
 PL1 0.00 dB  
 SFO1 300.1315007 MHz

F2 - Processing parameters  
 SI 32768  
 SF 300.1300063 MHz  
 WDW no  
 SSB 0  
 LB 0.00 Hz  
 GB 0  
 PC 1.00

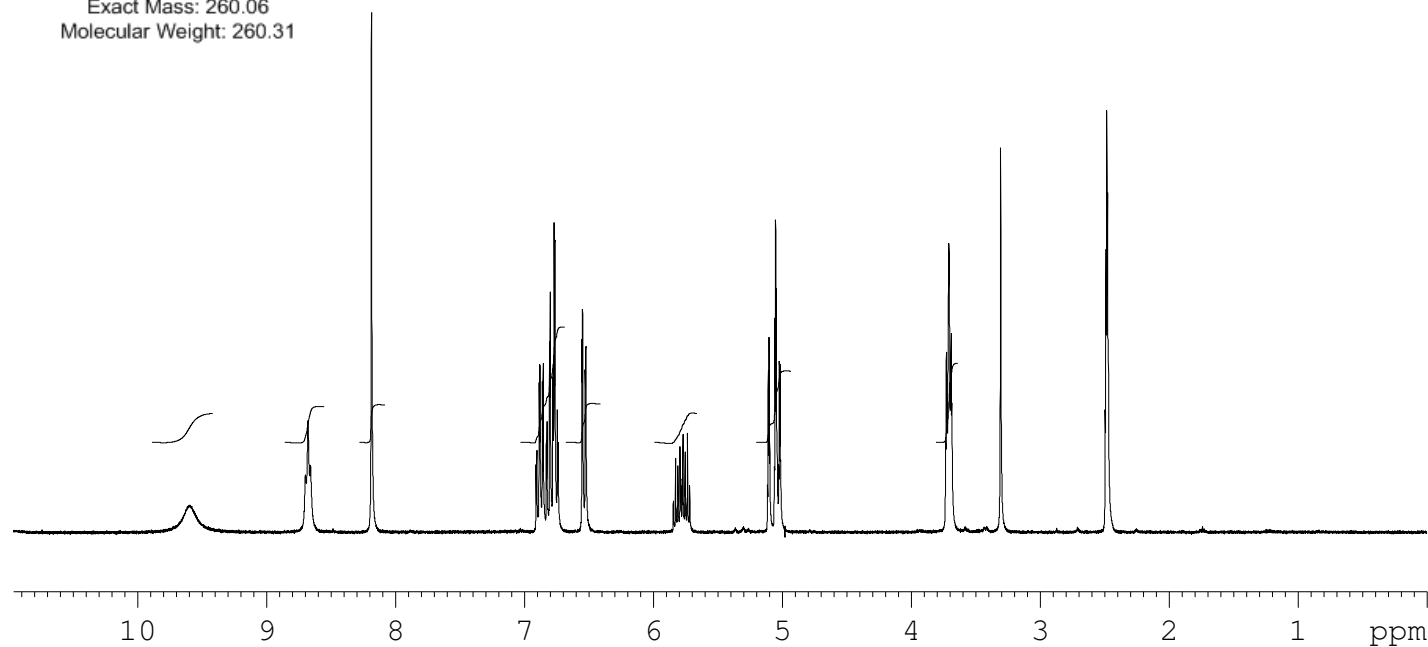

0.75  
 0.93  
 0.98  
 3.02  
 1.00  
 0.75  
 1.86  
 2.08

dc-1-48-101

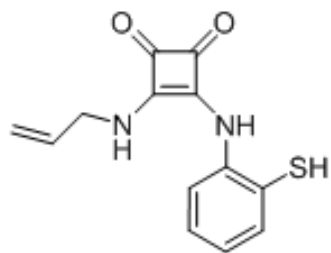

177.521  
 163.263  
 147.030  
 135.383  
 135.270  
 128.187  
 127.721  
 126.825  
 120.967  
 117.660  
 116.257  
 102.404

41.643  
 41.198  
 40.930  
 40.654  
 40.375  
 40.098  
 39.821  
 39.540

Current Data Parameters  
 NAME dc-1-48-101  
 EXPNO 1  
 PROCNO 1

F2 - Acquisition Parameters

Date\_ 20100105  
 Time 16.40  
 INSTRUM spect  
 PROBHD 5 mm QNP 1H/1  
 PULPROG zgdc  
 TD 65536  
 SOLVENT DMSO  
 NS 300  
 DS 0  
 SWH 18832.393 Hz  
 FIDRES 0.287360 Hz  
 AQ 1.7400308 sec  
 RG 1448.2  
 DW 26.550 usec  
 DE 6.00 usec  
 TE 298.2 K  
 D1 1.00000000 sec  
 d11 0.03000000 sec  
 TD0 1

===== CHANNEL f1 =====

NUC1 13C  
 P1 11.80 usec  
 PL1 0.00 dB  
 SFO1 75.4760200 MHz

===== CHANNEL f2 =====

CPDPRG2 waltz16  
 NUC2 1H  
 PCPD2 95.00 usec  
 PL2 0.00 dB  
 PL12 18.00 dB  
 SFO2 300.1312005 MHz

F2 - Processing parameters

SI 32768  
 SF 75.4677190 MHz  
 WDW no  
 SSB 0  
 LB 0.00 Hz  
 0  
 1.40

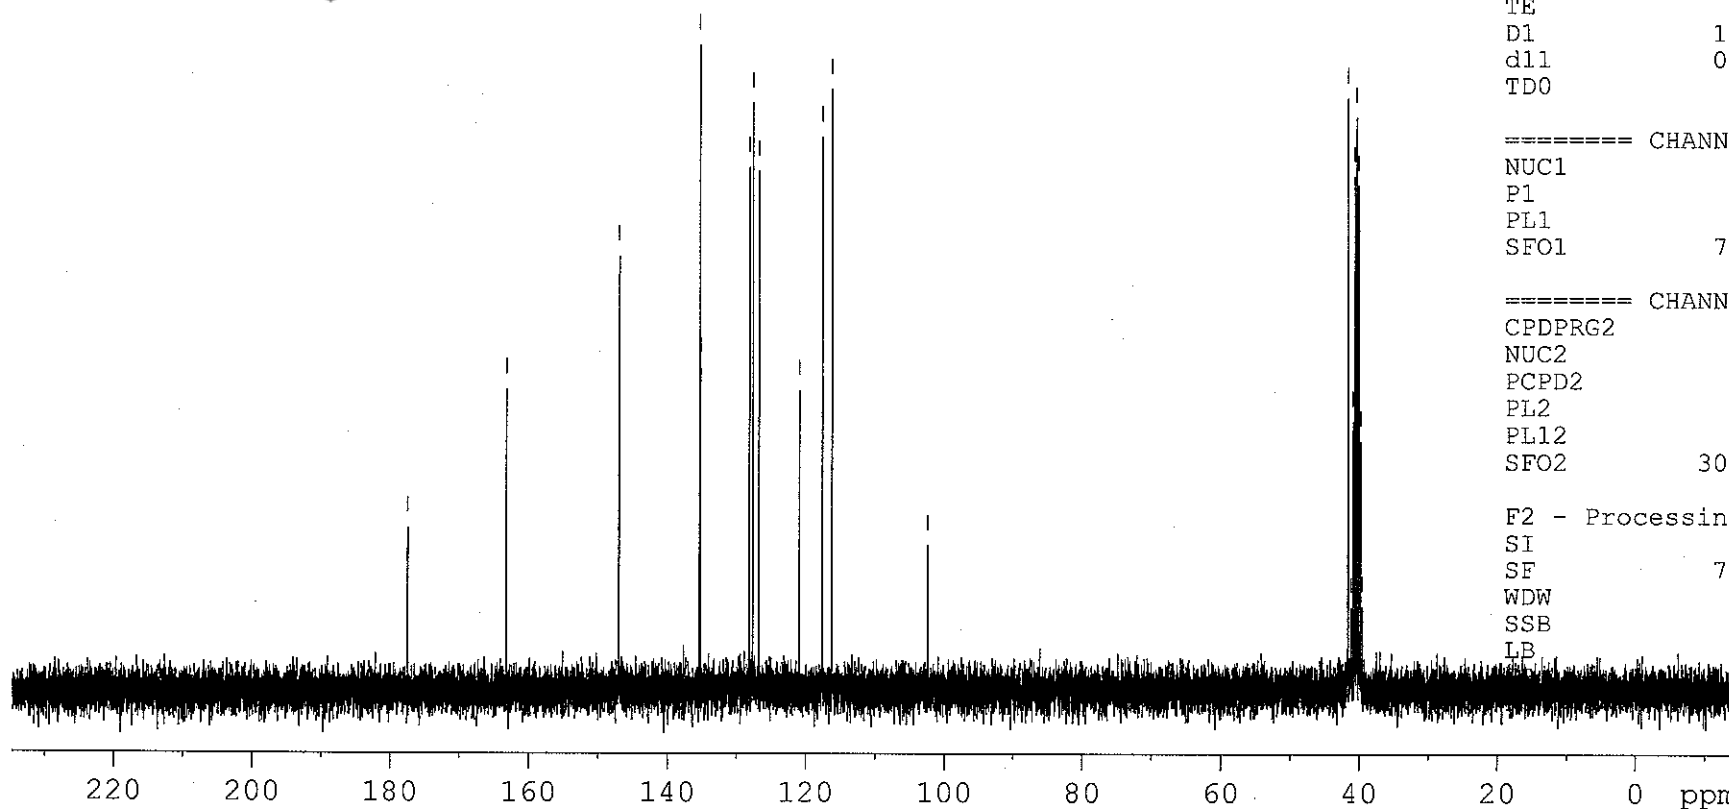

## MS Spectrum

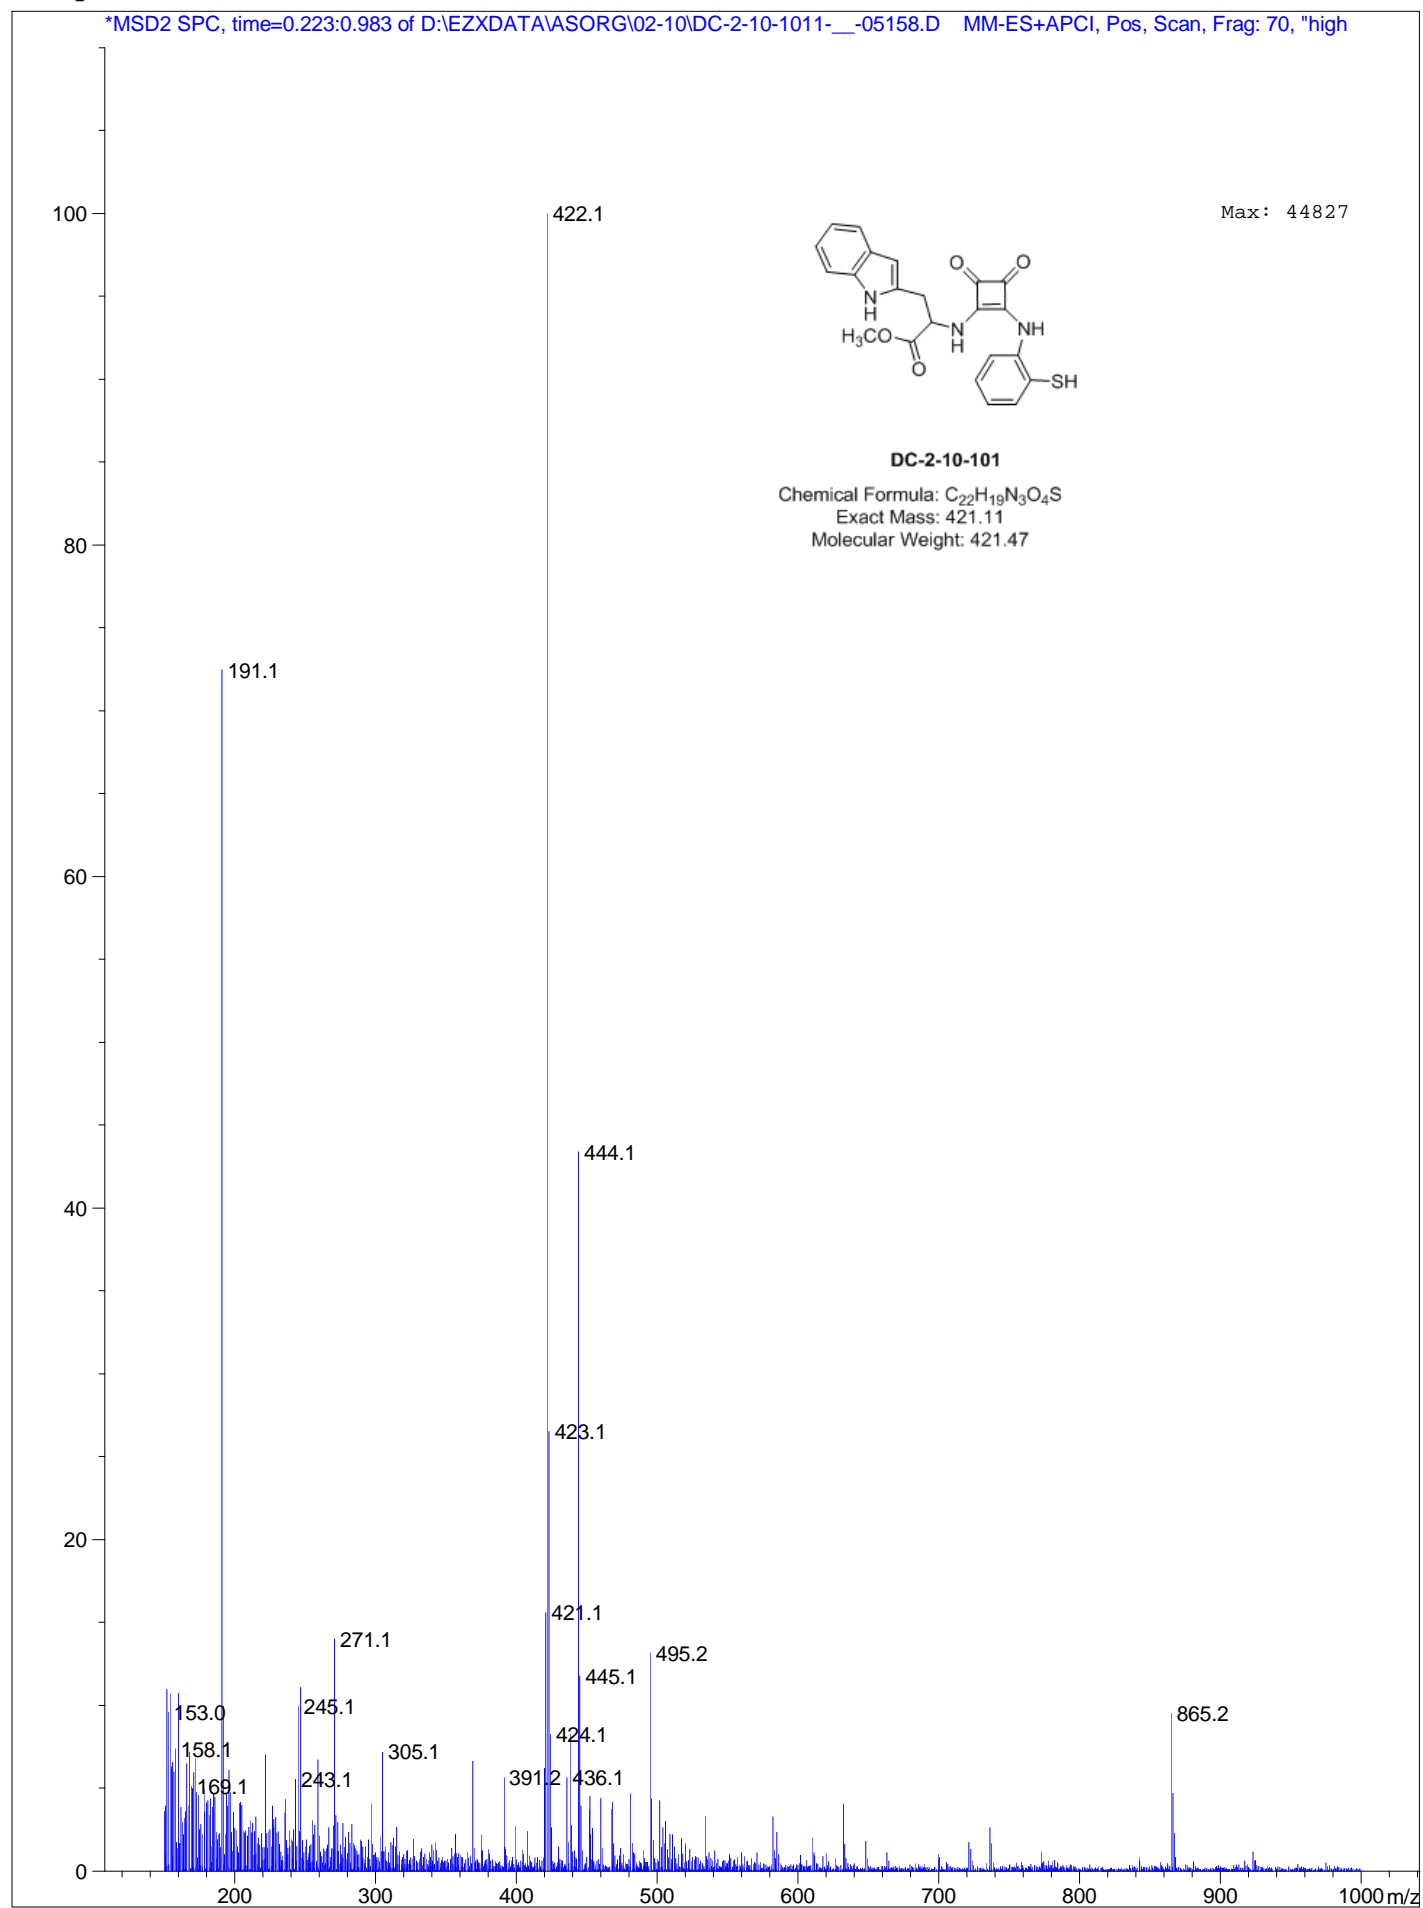

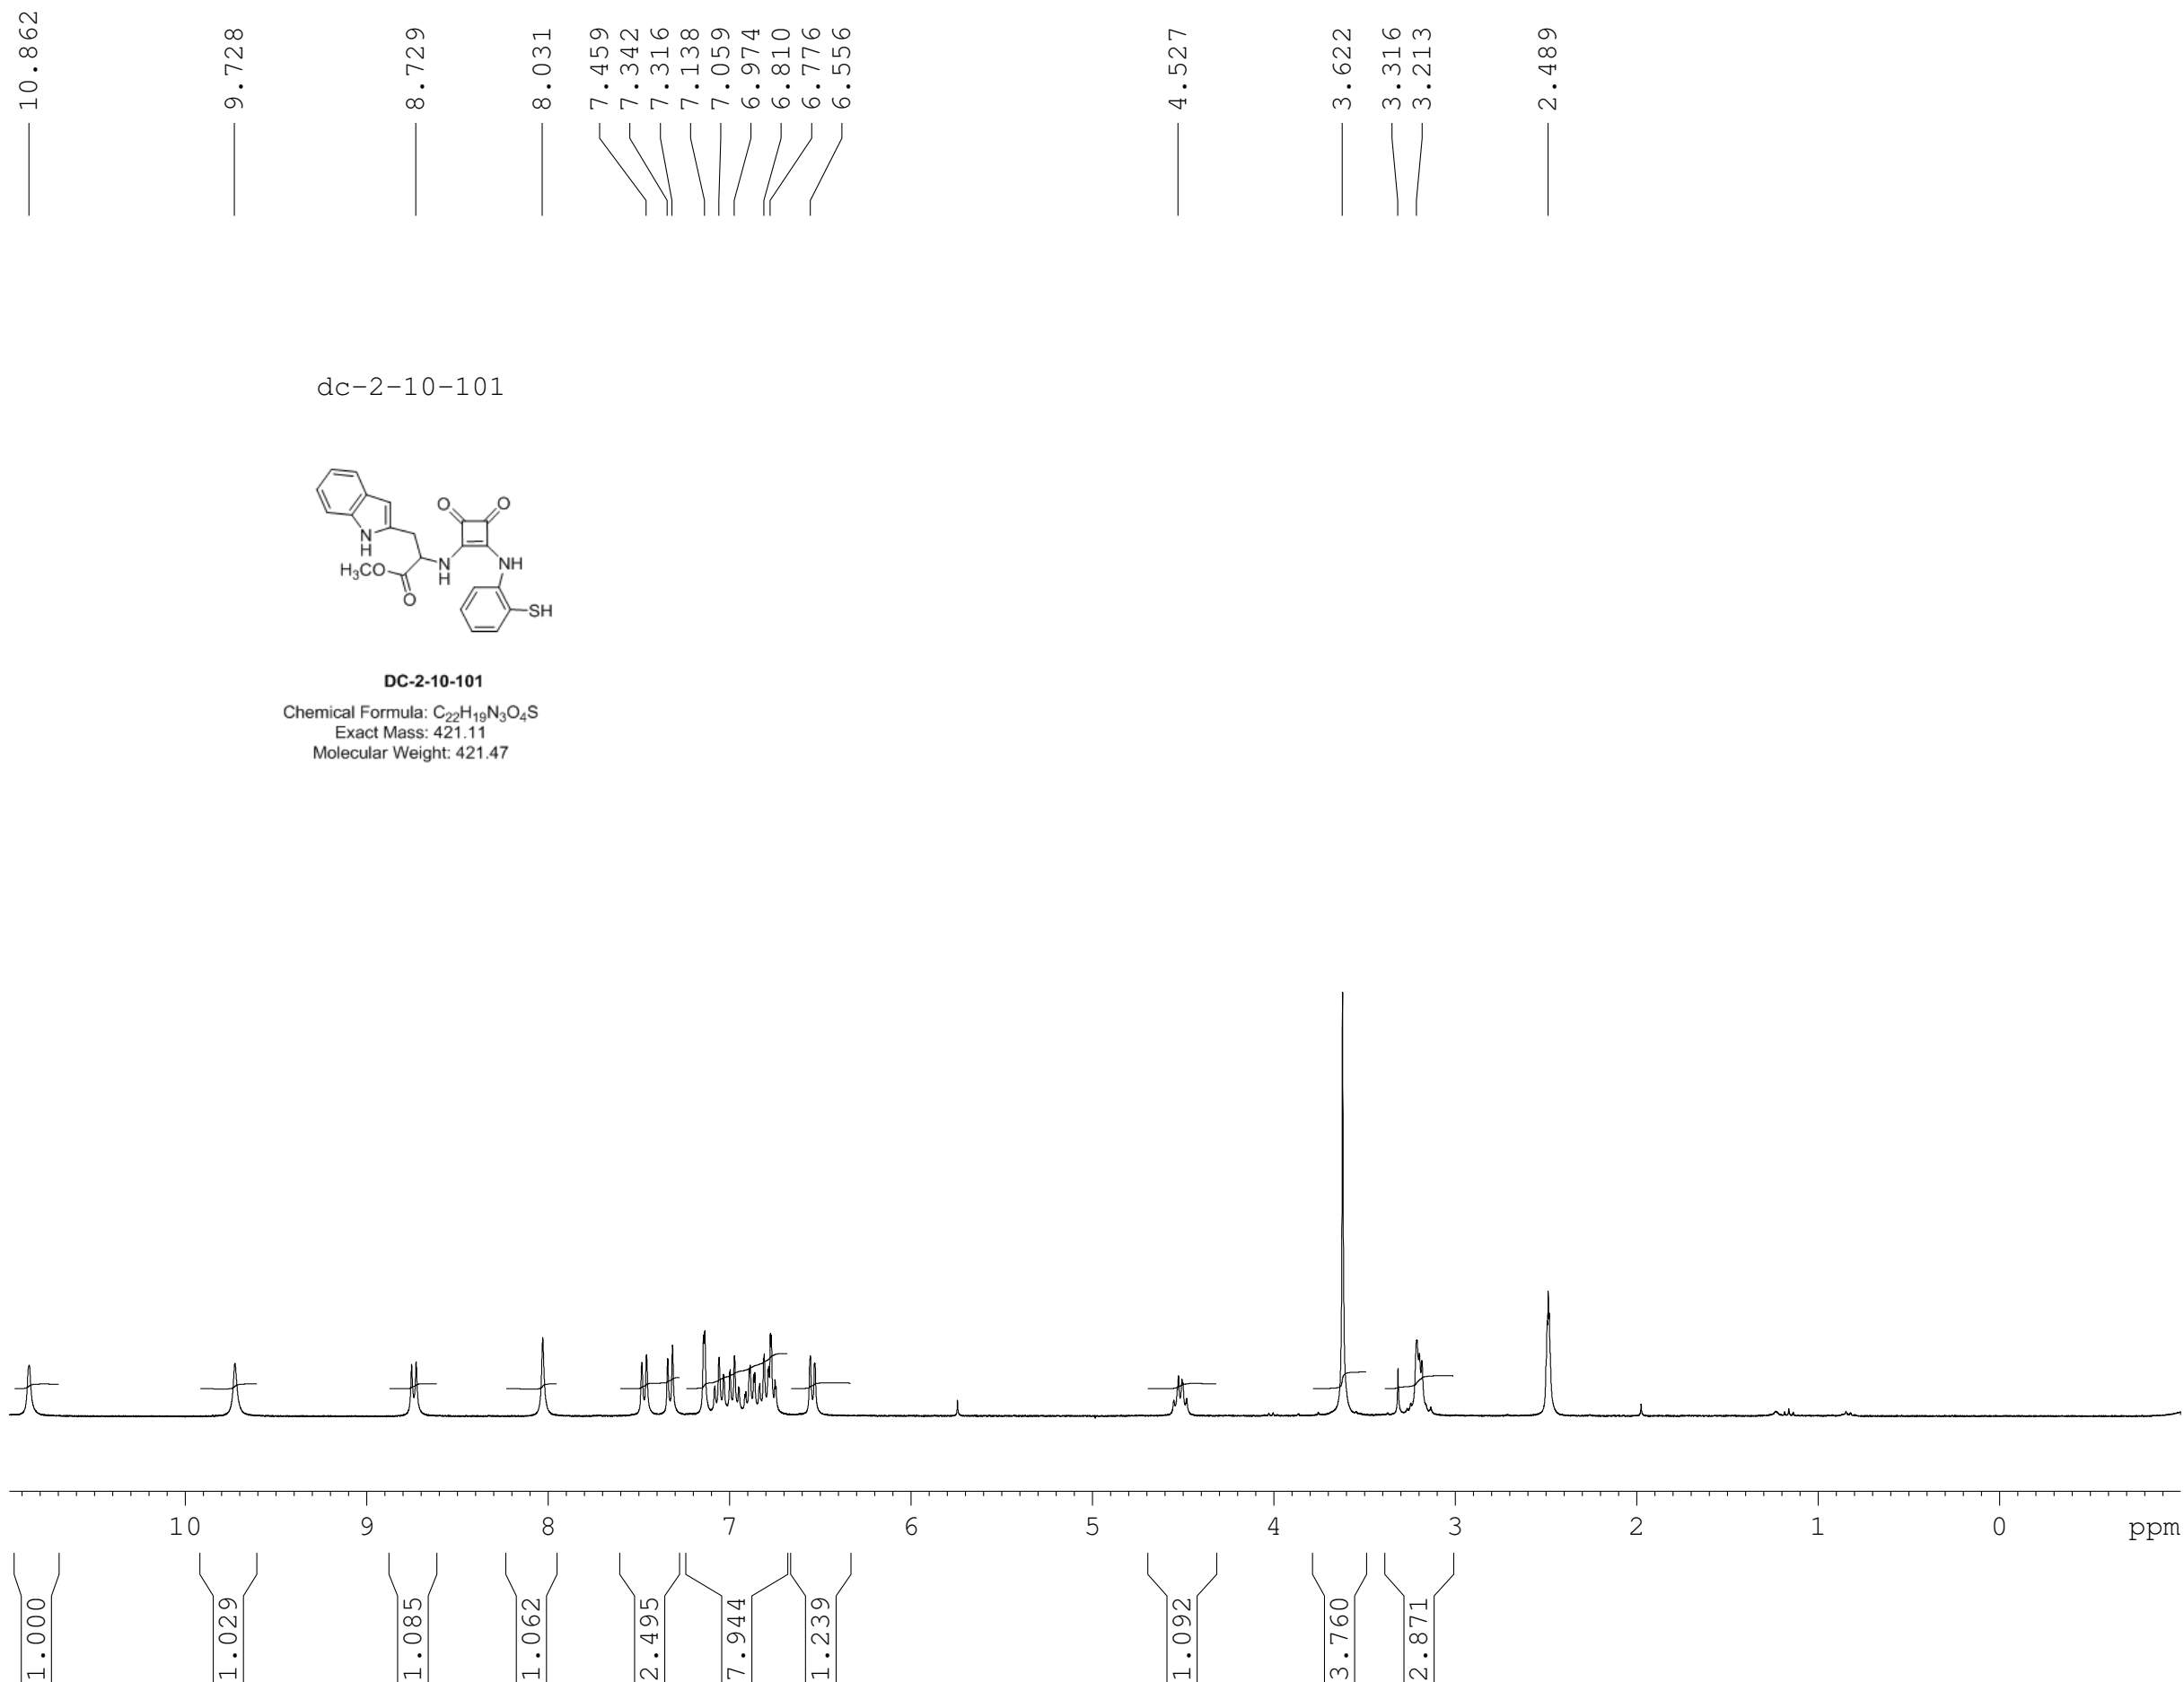

Current Data Parameters

NAME dc-2-10-101  
EXPNO 1  
PROCNO 1

F2 - Acquisition Parameters

Date\_ 20100130  
Time 15.02  
INSTRUM spect  
PROBHD 5 mm QNP 1H/1  
PULPROG zg  
TD 32768  
SOLVENT DMSO  
NS 16  
DS 0  
SWH 3591.954 Hz  
FIDRES 0.109618 Hz  
AQ 4.5613556 sec  
RG 456.1  
DW 139.200 usec  
DE 54.00 usec  
TE 298.2 K  
D1 1.00000000 sec  
TD0 1

==== CHANNEL f1 =====

NUC1 1H  
P1 9.75 usec  
PL1 0.00 dB  
SFO1 300.1315007 MHz

F2 - Processing parameters

SI 32768  
SF 300.1300042 MHz  
WDW no  
SSB 0  
LB 0.00 Hz  
GB 0  
PC 1.00

DC-2-10-carbon2

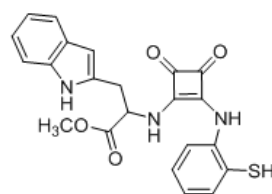

**DC-2-10-101**

Chemical Formula: C<sub>22</sub>H<sub>19</sub>N<sub>3</sub>O<sub>4</sub>S  
 Exact Mass: 421.11  
 Molecular Weight: 421.47

176.242  
 171.773  
 162.831  
 146.357  
 136.214  
 134.433  
 127.480  
 127.095  
 126.993  
 126.201  
 123.920  
 121.137  
 120.145  
 118.587  
 118.075  
 117.017  
 111.617  
 109.382  
 101.634

53.041  
 52.226  
 40.461  
 40.274  
 40.186  
 39.910  
 39.631  
 39.354  
 39.075  
 38.792  
 26.425

Current Data Parameters  
 NAME DC-2-10-carbon2  
 EXPNO 1  
 PROCNO 1

F2 - Acquisition Parameters  
 Date\_ 20100130  
 Time 16.42  
 INSTRUM spect  
 PROBHD 5 mm QNP 1H/1  
 PULPROG zgdc  
 TD 65536  
 SOLVENT DMSO  
 NS 800  
 DS 0  
 SWH 18832.393 Hz  
 FIDRES 0.287360 Hz  
 AQ 1.7400308 sec  
 RG 4597.6  
 DW 26.550 usec  
 DE 6.00 usec  
 TE 298.2 K  
 D1 1.00000000 sec  
 d11 0.03000000 sec  
 TD0 1

==== CHANNEL f1 =====  
 NUC1 13C  
 P1 11.80 usec  
 PL1 0.00 dB  
 SFO1 75.4760200 MHz

==== CHANNEL f2 =====  
 CPDPRG2 waltz16  
 NUC2 1H  
 PCPD2 95.00 usec  
 PL2 0.00 dB  
 PL12 18.00 dB  
 SFO2 300.1312005 MHz

F2 - Processing parameters  
 SI 32768  
 SF 75.4677751 MHz  
 WDW no  
 SSB 0  
 LB 0.00 Hz  
 GB 0  
 PC 1.00

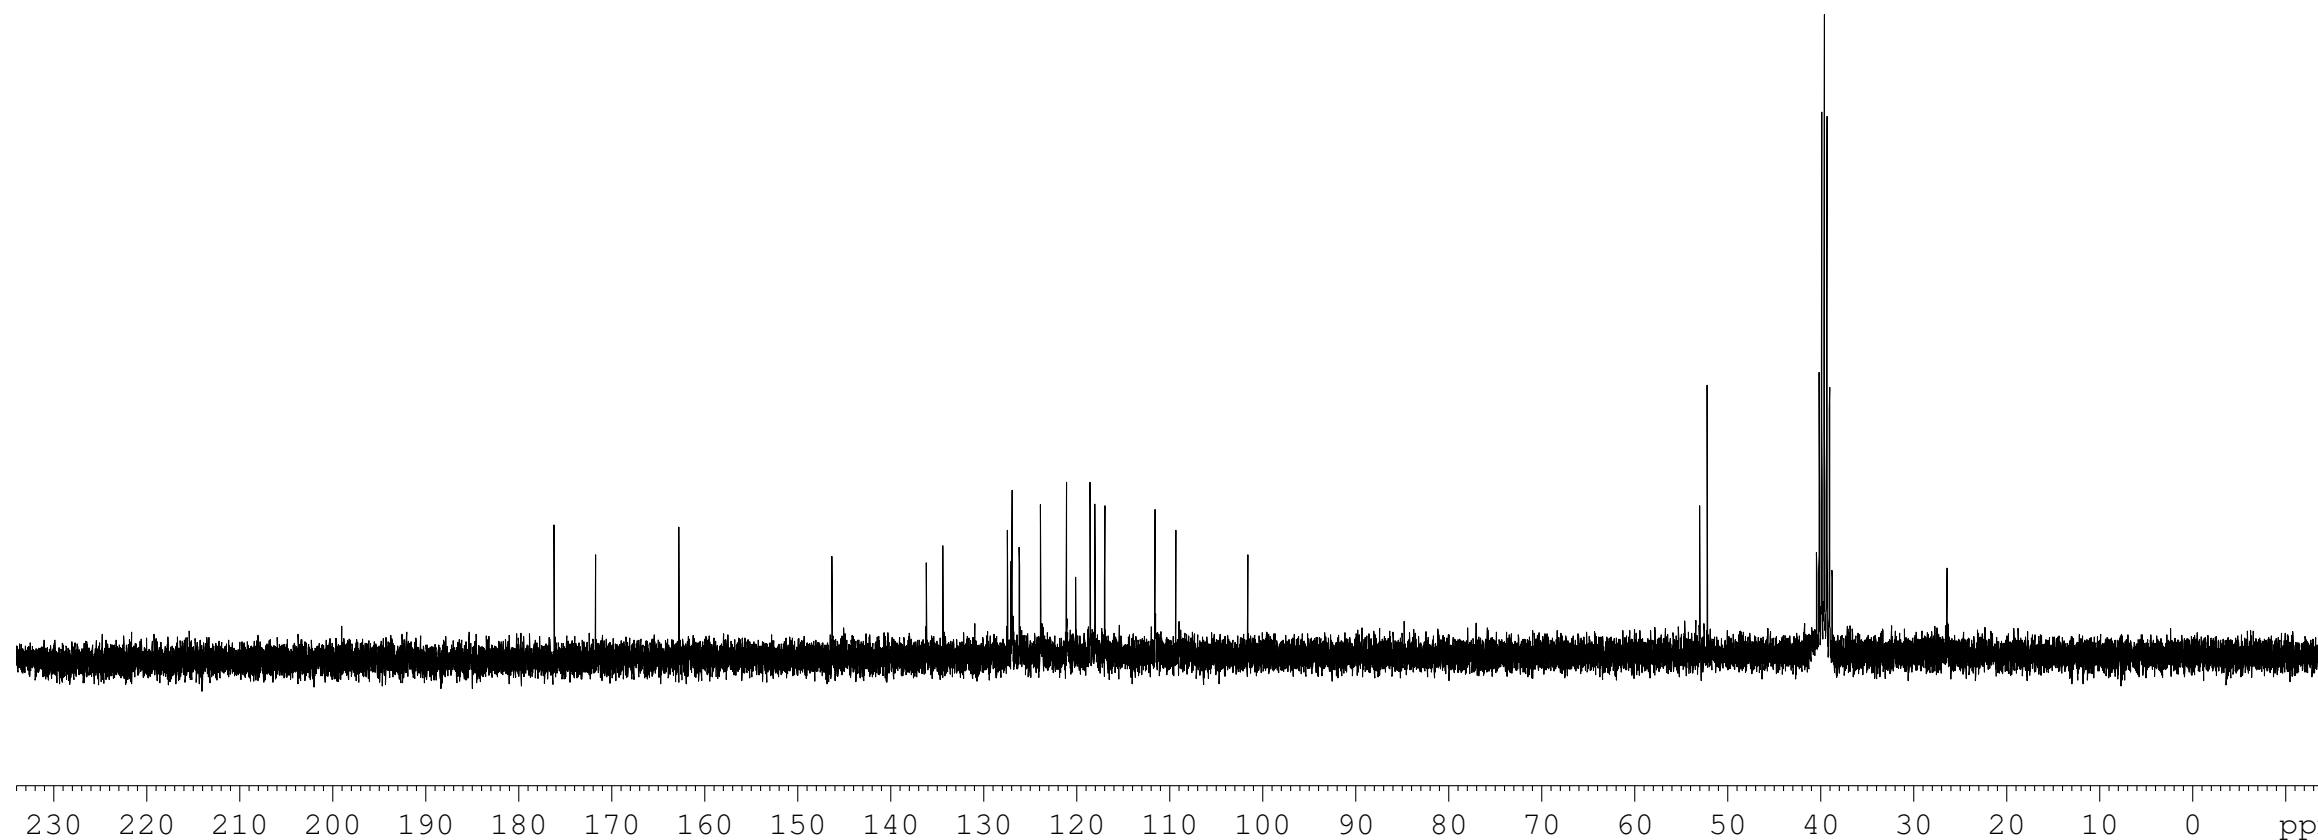

8.607  
 8.602  
 8.593  
 8.588  
 8.577  
 8.555  
 7.266  
 7.247  
 7.233  
 7.227  
 7.206  
 7.204  
 7.203  
 7.181  
 7.176  
 7.013  
 7.012  
 7.009  
 7.008  
 6.989  
 6.987  
 6.983  
 6.891  
 6.887  
 6.864  
 6.860  
 6.835  
 6.831  
 6.811  
 6.807  
 6.786  
 6.782  
 5.303

4.058  
 4.037  
 3.953  
 3.851

DC-2-32-102

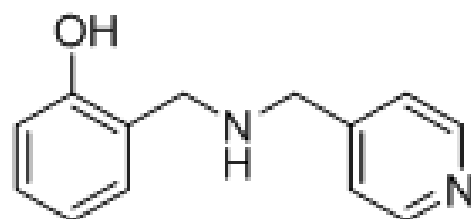

Current Data Parameters  
 NAME DC-2-32-102  
 EXPNO 1  
 PROCNO 1

F2 - Acquisition Parameters  
 Date\_ 20100208  
 Time 18.41  
 INSTRUM spect  
 PROBHD 5 mm QNP 1H/1  
 PULPROG zg  
 TD 32768  
 SOLVENT CDC13  
 NS 16  
 DS 0  
 SWH 3591.954 Hz  
 FIDRES 0.109618 Hz  
 AQ 4.5613556 sec  
 RG 574.7  
 DW 139.200 usec  
 DE 54.00 usec  
 TE 298.2 K  
 D1 1.00000000 sec  
 TD0 1

==== CHANNEL f1 =====  
 NUC1 1H  
 P1 9.75 usec  
 PL1 0.00 dB  
 SFO1 300.1315007 MHz

F2 - Processing parameters  
 SI 32768  
 SF 300.1300042 MHz  
 WDW no  
 SSB 0  
 LB 0.00 Hz  
 GB 0  
 PC 1.00

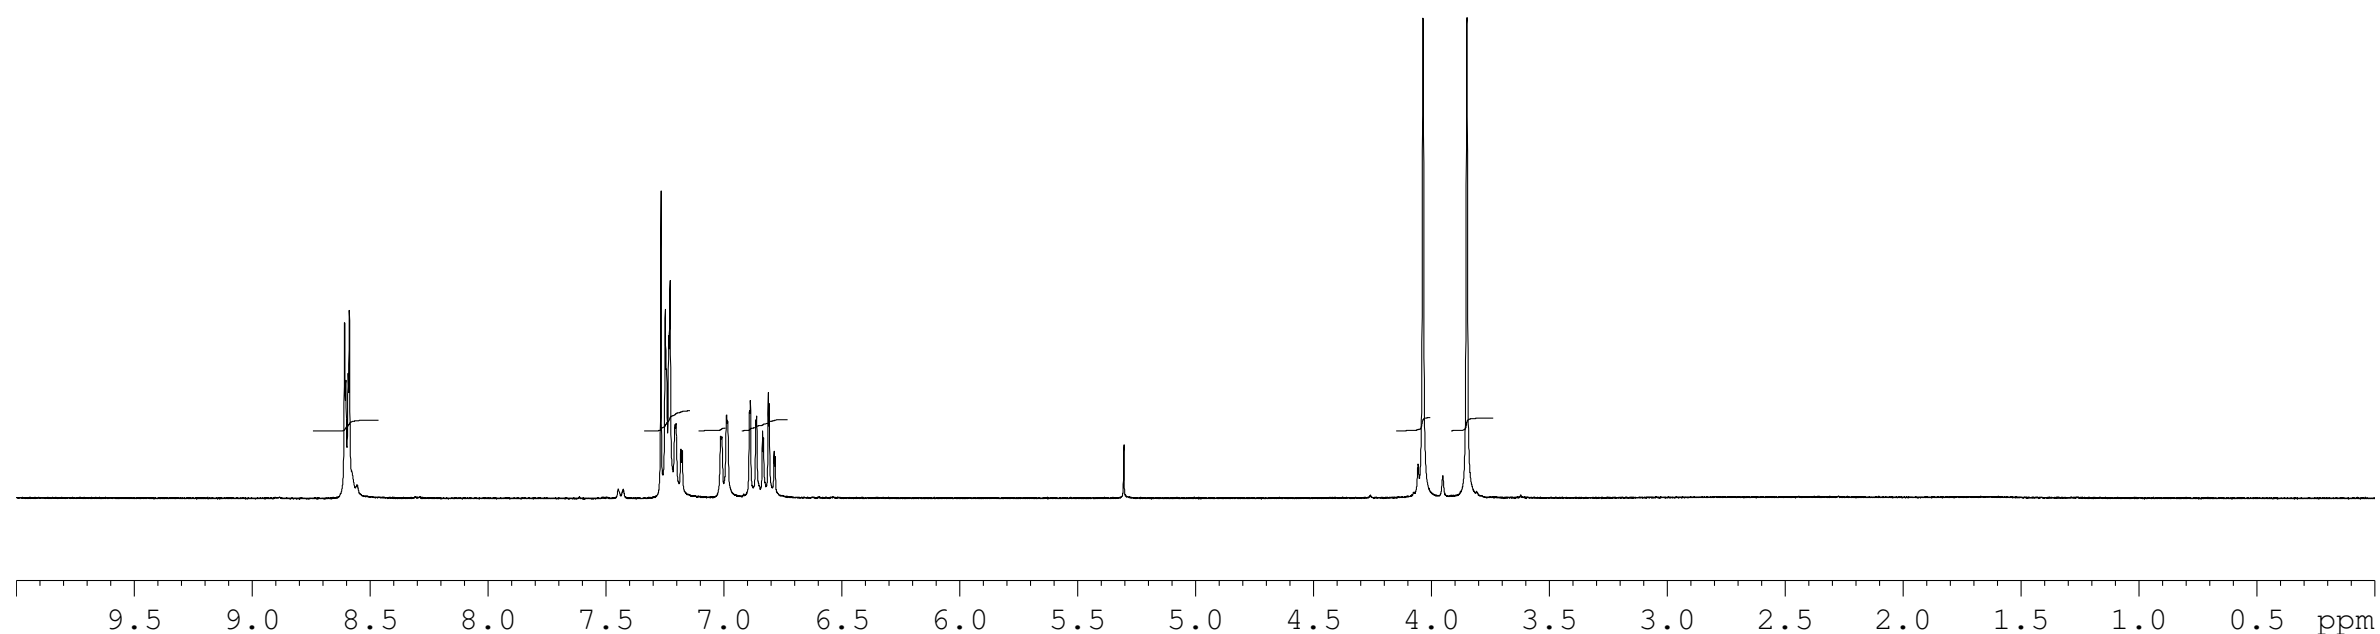

1.661  
 3.158  
 0.454  
 1.749  
 2.089  
 2.000

8.585  
 8.580  
 8.570  
 8.565  
 7.486  
 7.481  
 7.457  
 7.453  
 7.435  
 7.429  
 7.405  
 7.399  
 7.390  
 7.385  
 7.372  
 7.368  
 7.344  
 7.340  
 7.321  
 7.316  
 7.222  
 7.217  
 7.197  
 7.193  
 7.173  
 7.168  
 5.745

4.897  
 4.670

3.306

2.502  
 2.496  
 2.490  
 2.484  
 2.478

1.225

Dc-2-119-101

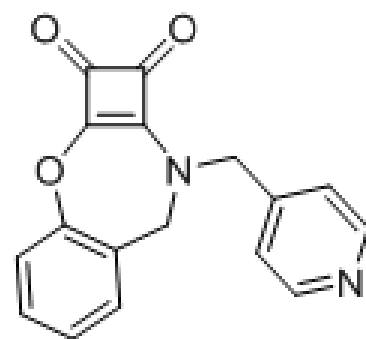

Current Data Parameters  
 NAME Dc-2-119-101  
 EXPNO 1  
 PROCNO 1

F2 - Acquisition Parameters  
 Date\_ 20100312  
 Time 16.03  
 INSTRUM spect  
 PROBHD 5 mm QNP 1H/1  
 PULPROG zg  
 TD 32768  
 SOLVENT CDC13  
 NS 32  
 DS 0  
 SWH 3591.954 Hz  
 FIDRES 0.109618 Hz  
 AQ 4.5613556 sec  
 RG 1024  
 DW 139.200 usec  
 DE 54.00 usec  
 TE 299.2 K  
 D1 1.00000000 sec  
 TD0 1

==== CHANNEL f1 =====  
 NUC1 1H  
 P1 9.75 usec  
 PL1 0.00 dB  
 SFO1 300.1315007 MHz

F2 - Processing parameters  
 SI 32768  
 SF 300.1300042 MHz  
 WDW no  
 SSB 0  
 LB 0.00 Hz  
 GB 0  
 PC 1.00

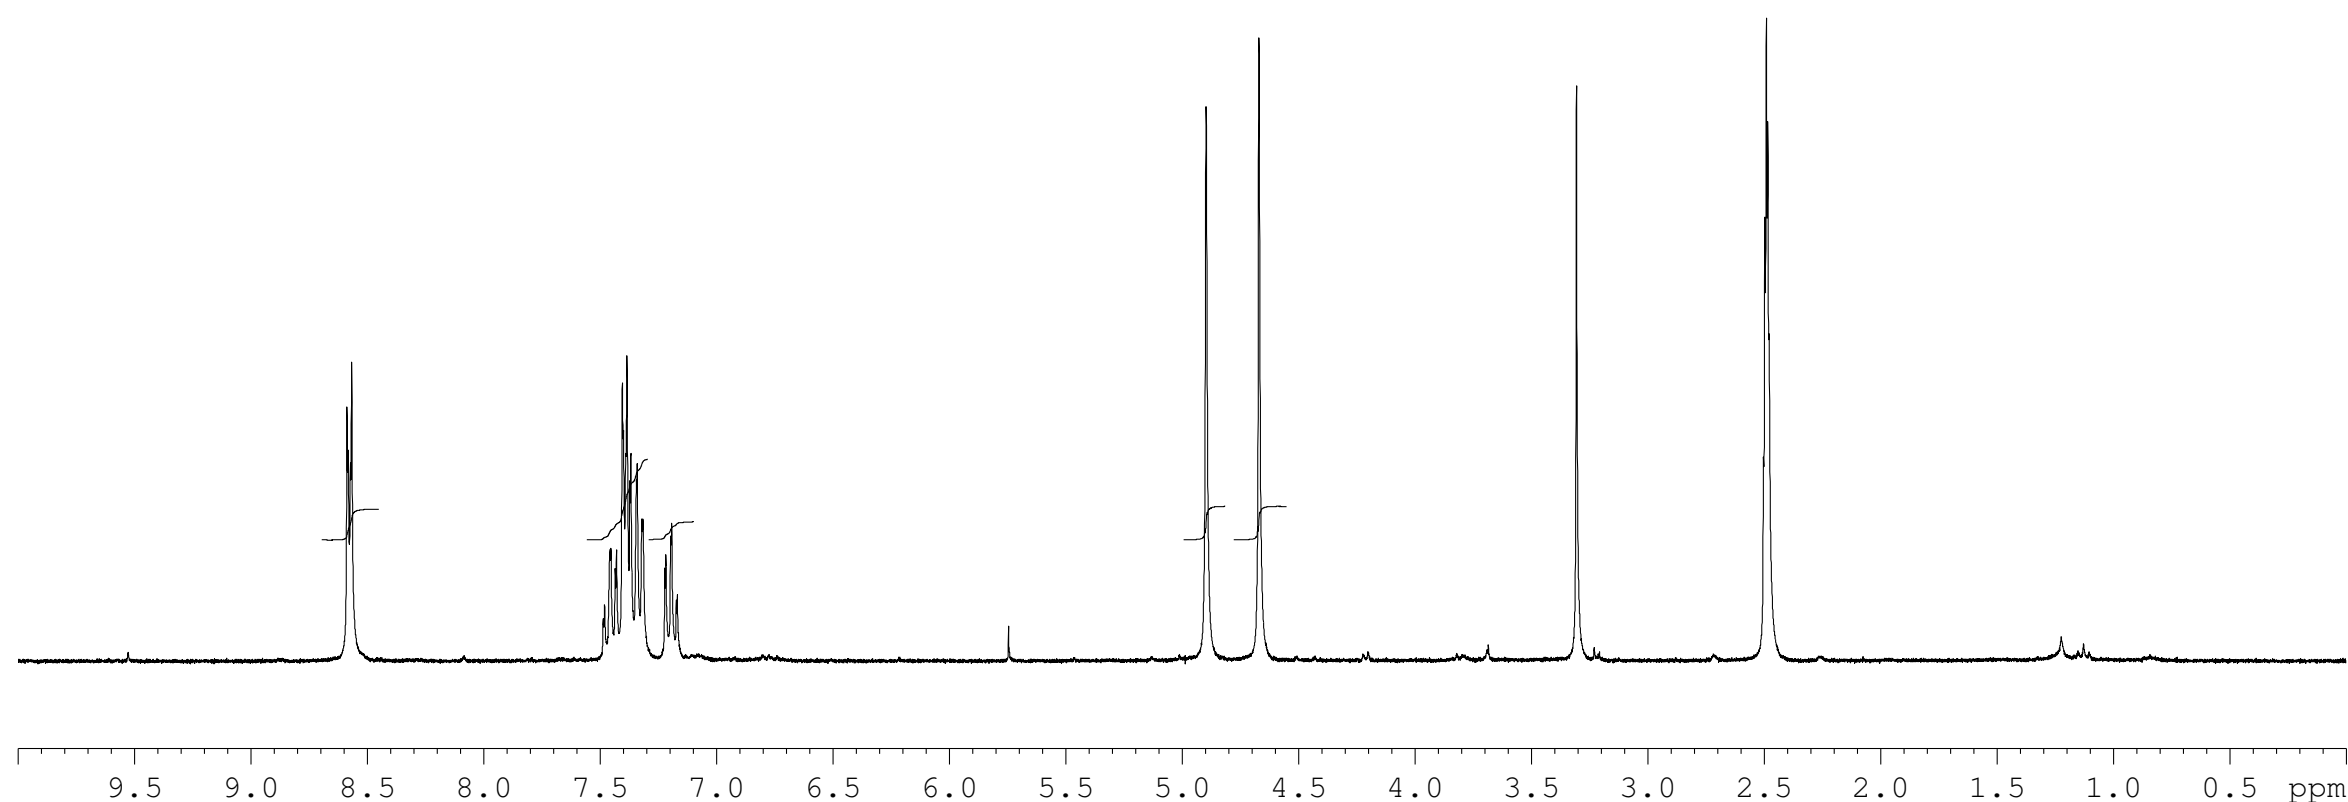

1.818

4.813

1.086

2.003

2.000



## MS Spectrum

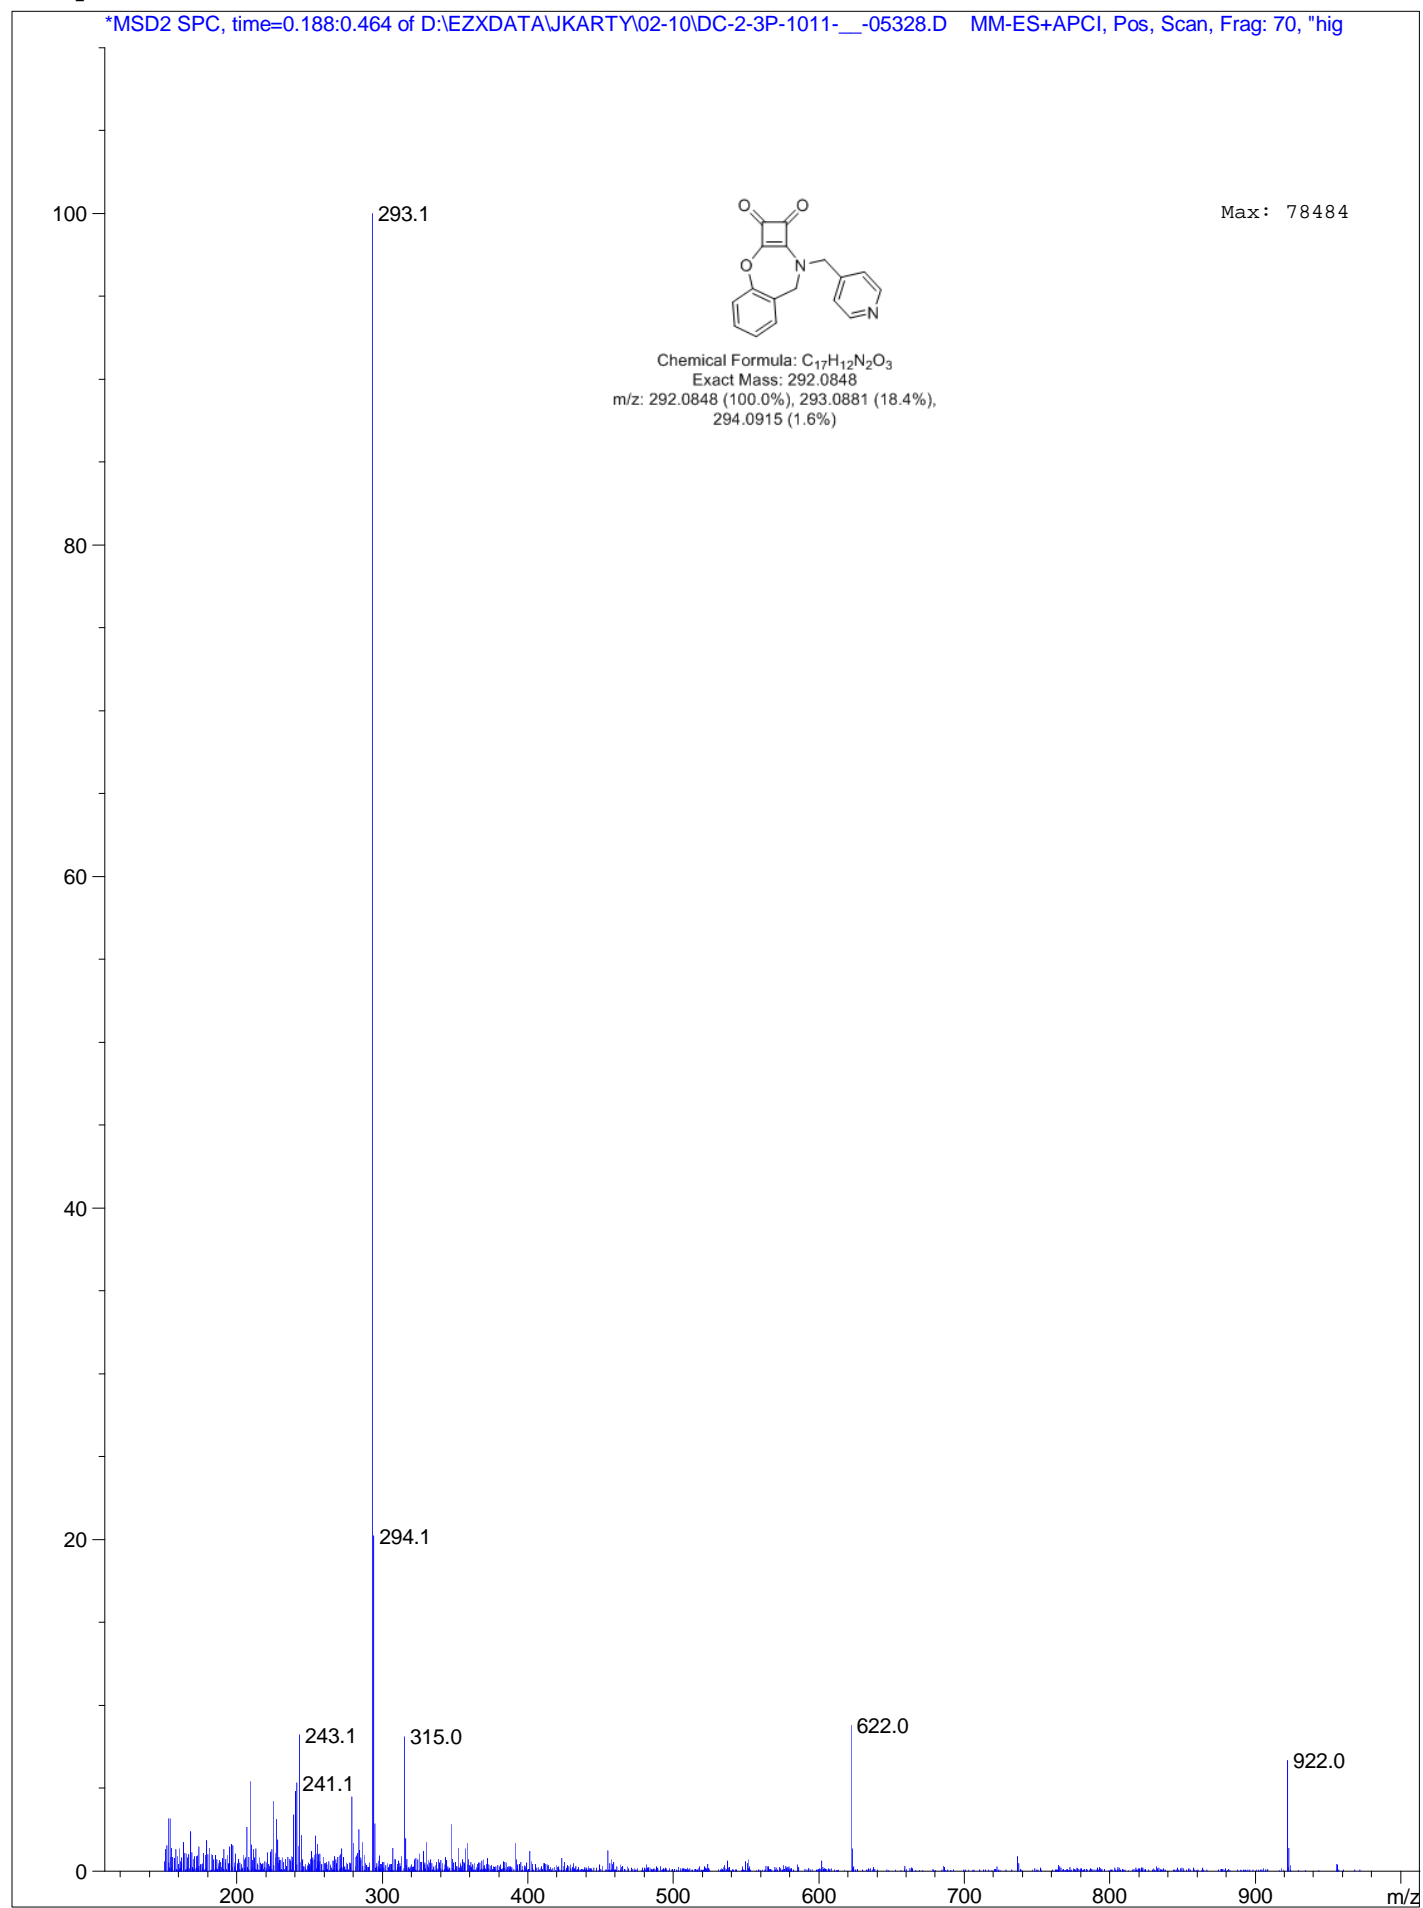

8.978  
8.957  
8.128  
8.108  
7.512  
7.486  
7.461  
7.410  
7.386  
7.383  
7.346  
7.320  
7.244  
7.220  
7.198  
7.195

5.168  
4.742  
4.321  
3.309  
2.491  
2.486

DC-2-45-103

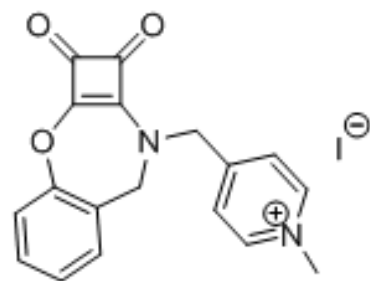

Current Data Parameters  
 NAME DC-2-45-103  
 EXPNO 1  
 PROCNO 1

F2 - Acquisition Parameters  
 Date\_ 20100212  
 Time 15.04  
 INSTRUM spect  
 PROBHD 5 mm QNP 1H/1  
 PULPROG zg  
 TD 32768  
 SOLVENT DMSO  
 NS 32  
 DS 0  
 SWH 3591.954 Hz  
 FIDRES 0.109618 Hz  
 AQ 4.5613556 sec  
 RG 645.1  
 DW 139.200 usec  
 DE 54.00 usec  
 TE 299.2 K  
 D1 1.00000000 sec  
 TD0 1

==== CHANNEL f1 =====  
 NUC1 1H  
 P1 9.75 usec  
 PL1 0.00 dB  
 SFO1 300.1315007 MHz

F2 - Processing parameters  
 SI 32768  
 SF 300.1300042 MHz  
 WDW no  
 SSB 0  
 LB 0.00 Hz  
 GB 0  
 PC 1.00

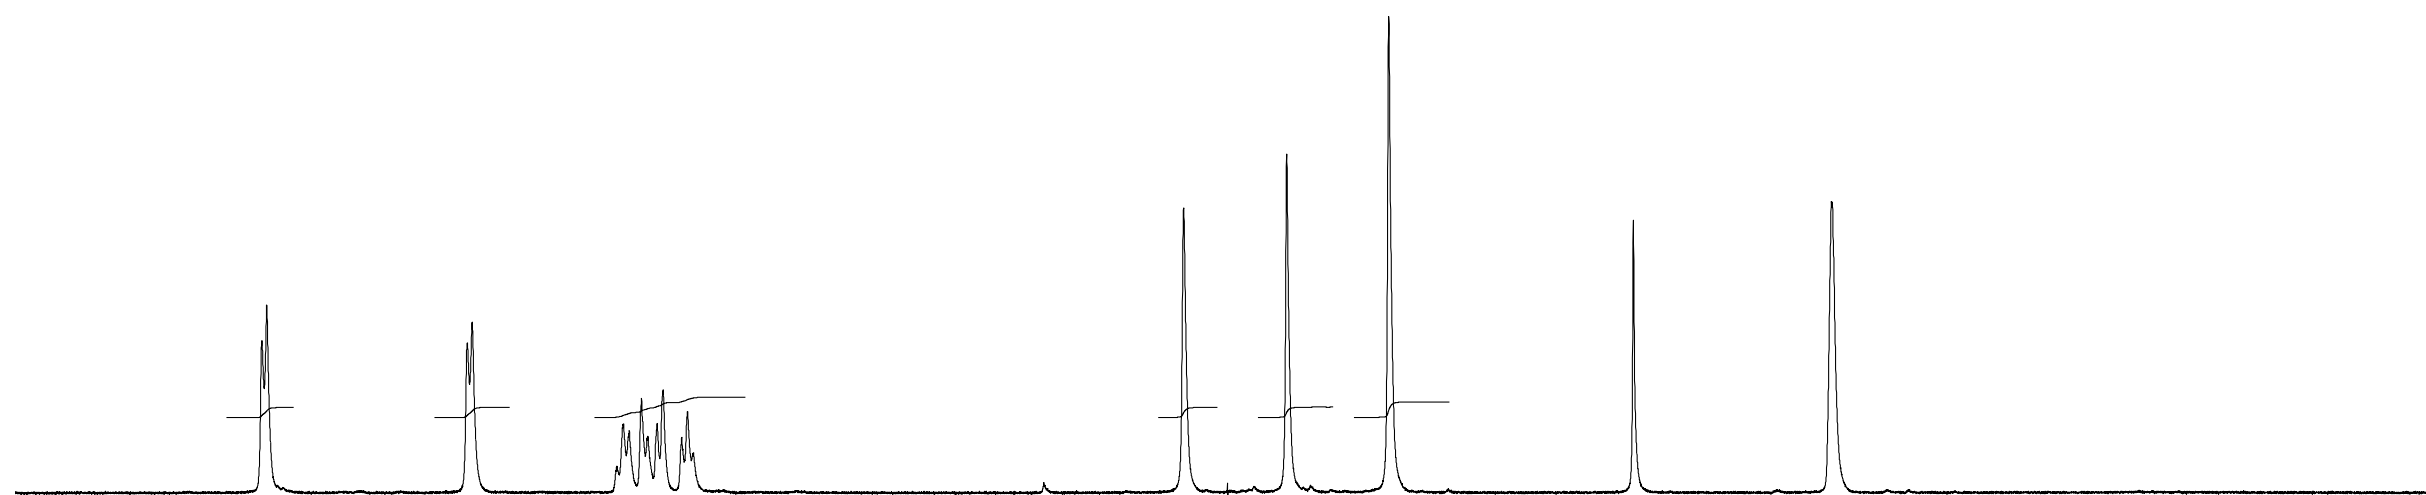

9.5 9.0 8.5 8.0 7.5 7.0 6.5 6.0 5.5 5.0 4.5 4.0 3.5 3.0 2.5 2.0 1.5 1.0 0.5 ppm

2.012  
1.981  
4.037  
2.000  
2.077  
3.095

DC-2-45-103-H2O

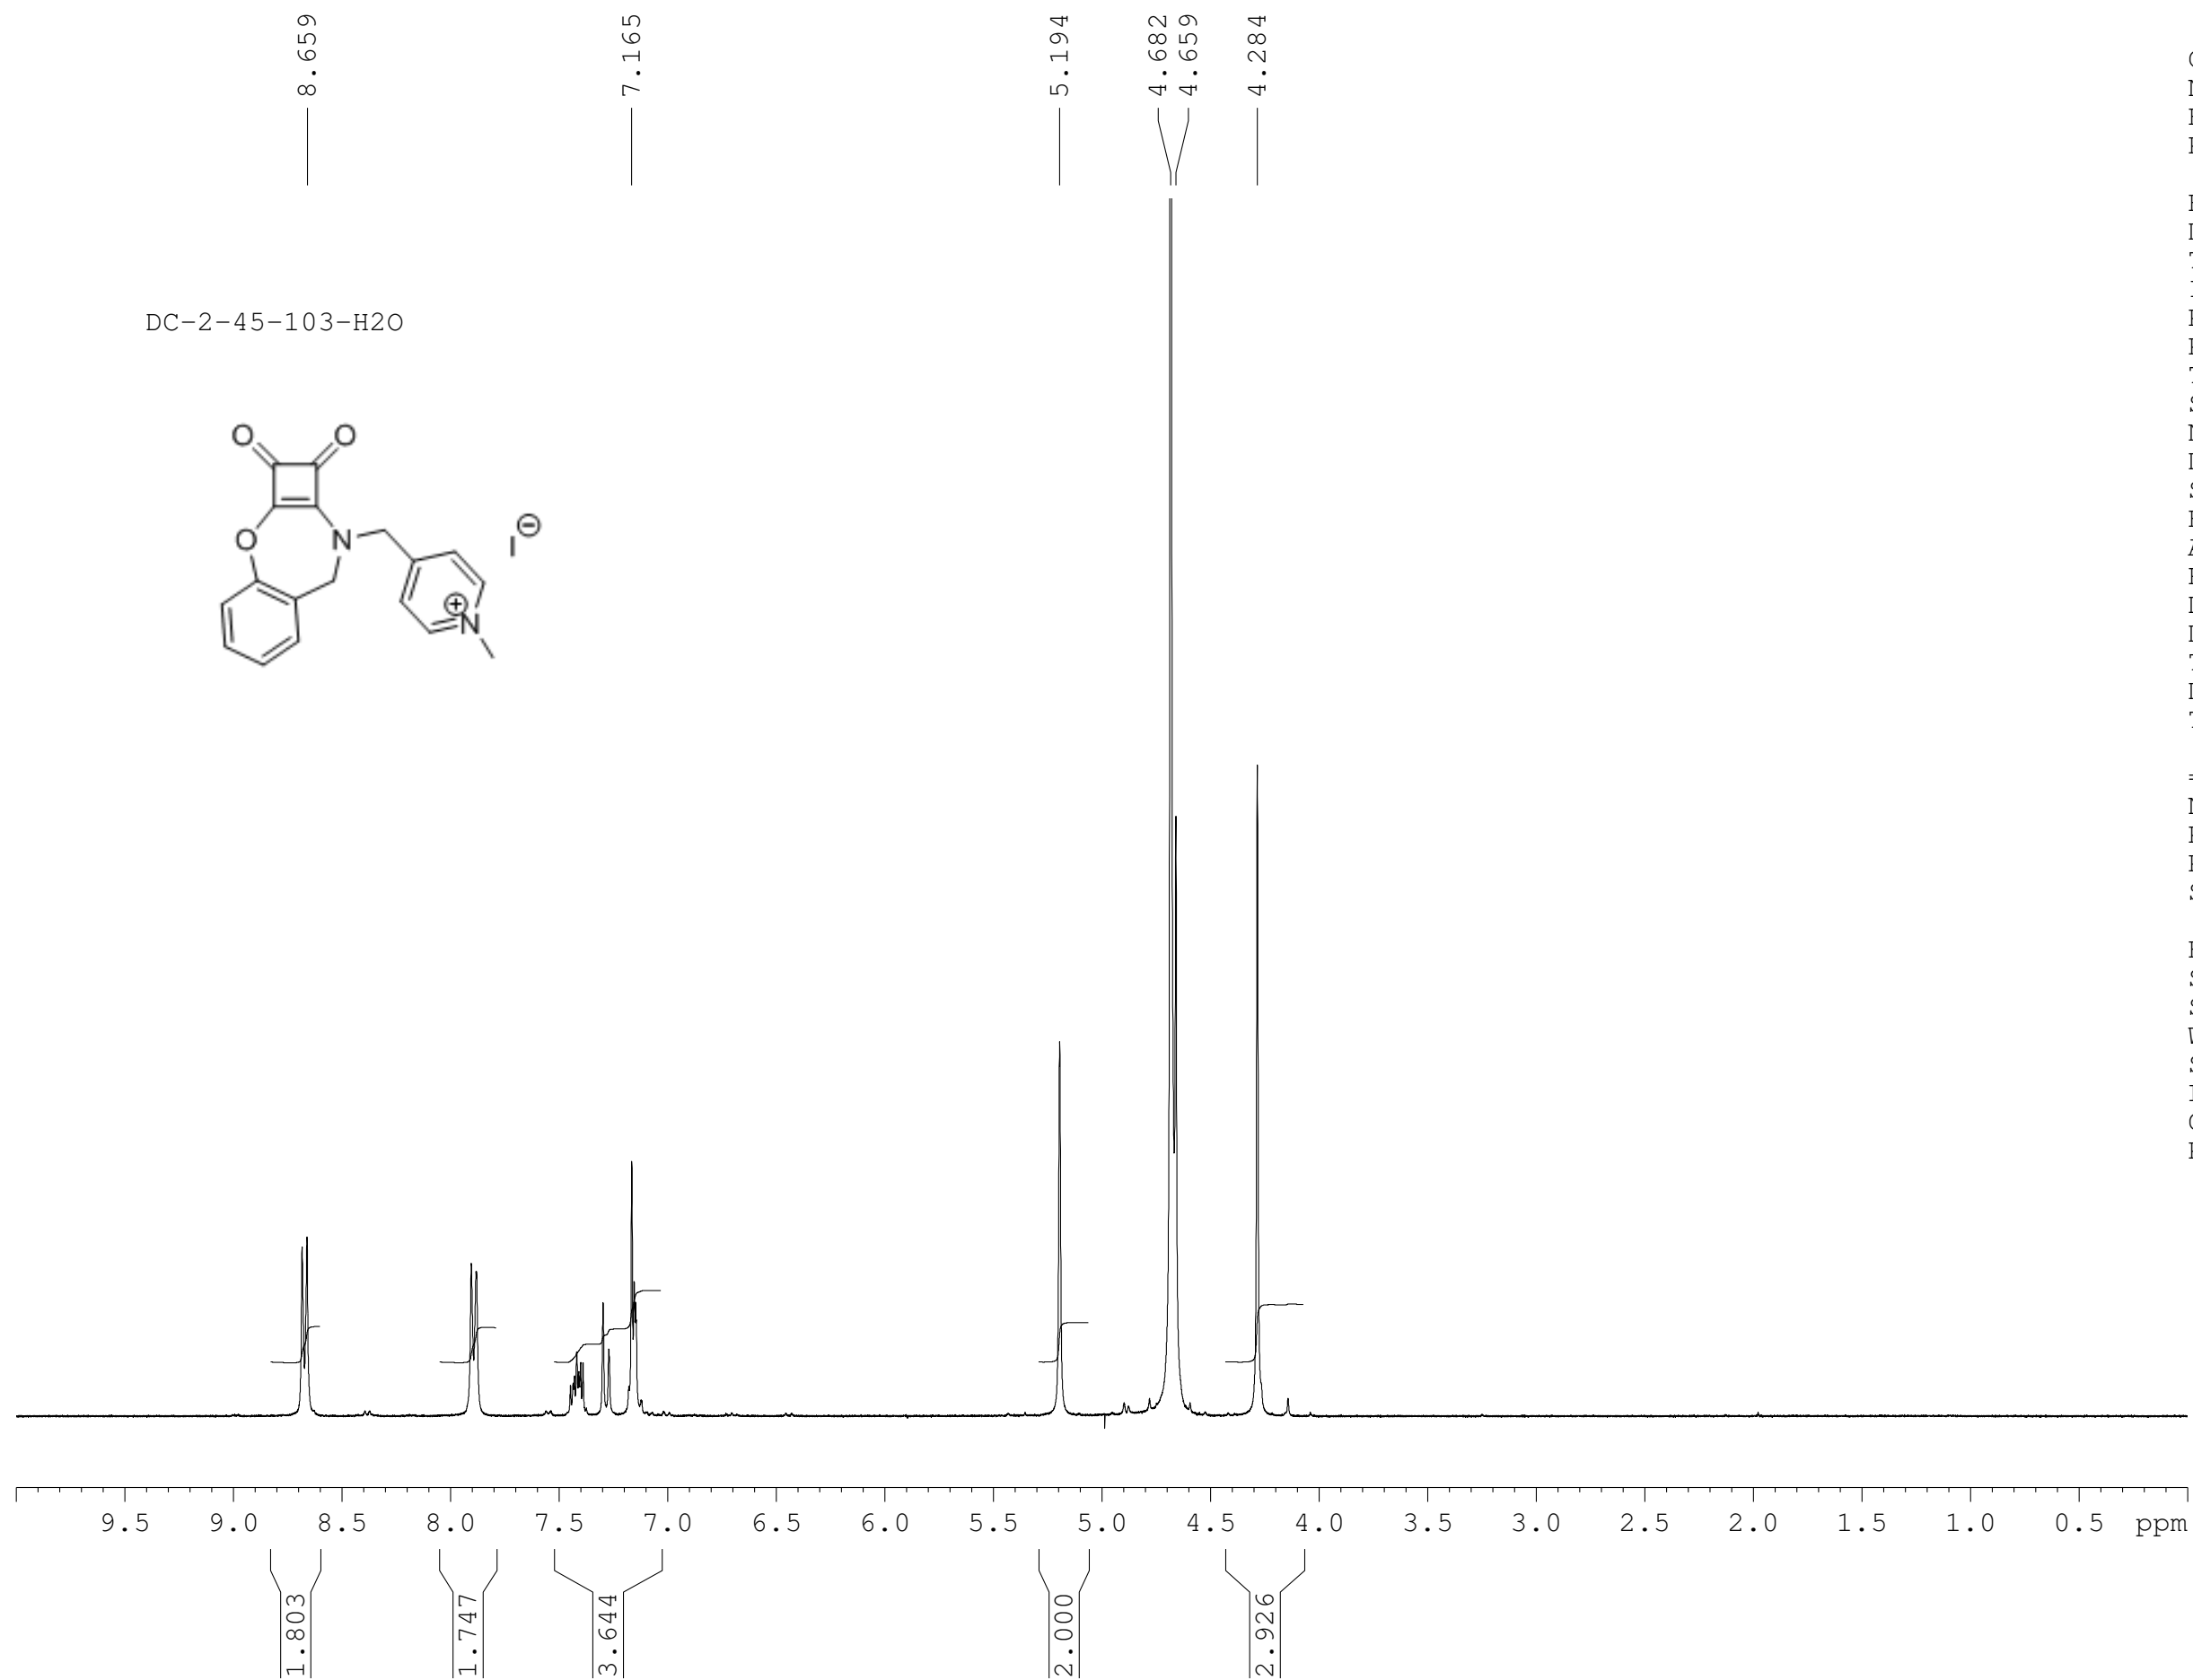

Current Data Parameters  
NAME DC-2-45-103-H2O  
EXPNO 1  
PROCNO 1

F2 - Acquisition Parameters  
Date\_ 20100218  
Time 10.05  
INSTRUM spect  
PROBHD 5 mm QNP 1H/1  
PULPROG zg  
TD 32768  
SOLVENT D2O  
NS 32  
DS 0  
SWH 3591.954 Hz  
FIDRES 0.109618 Hz  
AQ 4.5613556 sec  
RG 256  
DW 139.200 usec  
DE 54.00 usec  
TE 298.2 K  
D1 1.00000000 sec  
TD0 1

==== CHANNEL f1 =====  
NUC1 1H  
P1 9.75 usec  
PL1 0.00 dB  
SFO1 300.1315007 MHz

F2 - Processing parameters  
SI 32768  
SF 300.1300042 MHz  
WDW no  
SSB 0  
LB 0.00 Hz  
GB 0  
PC 1.00

DC-3-45-101-carbon

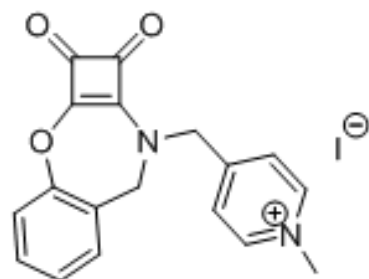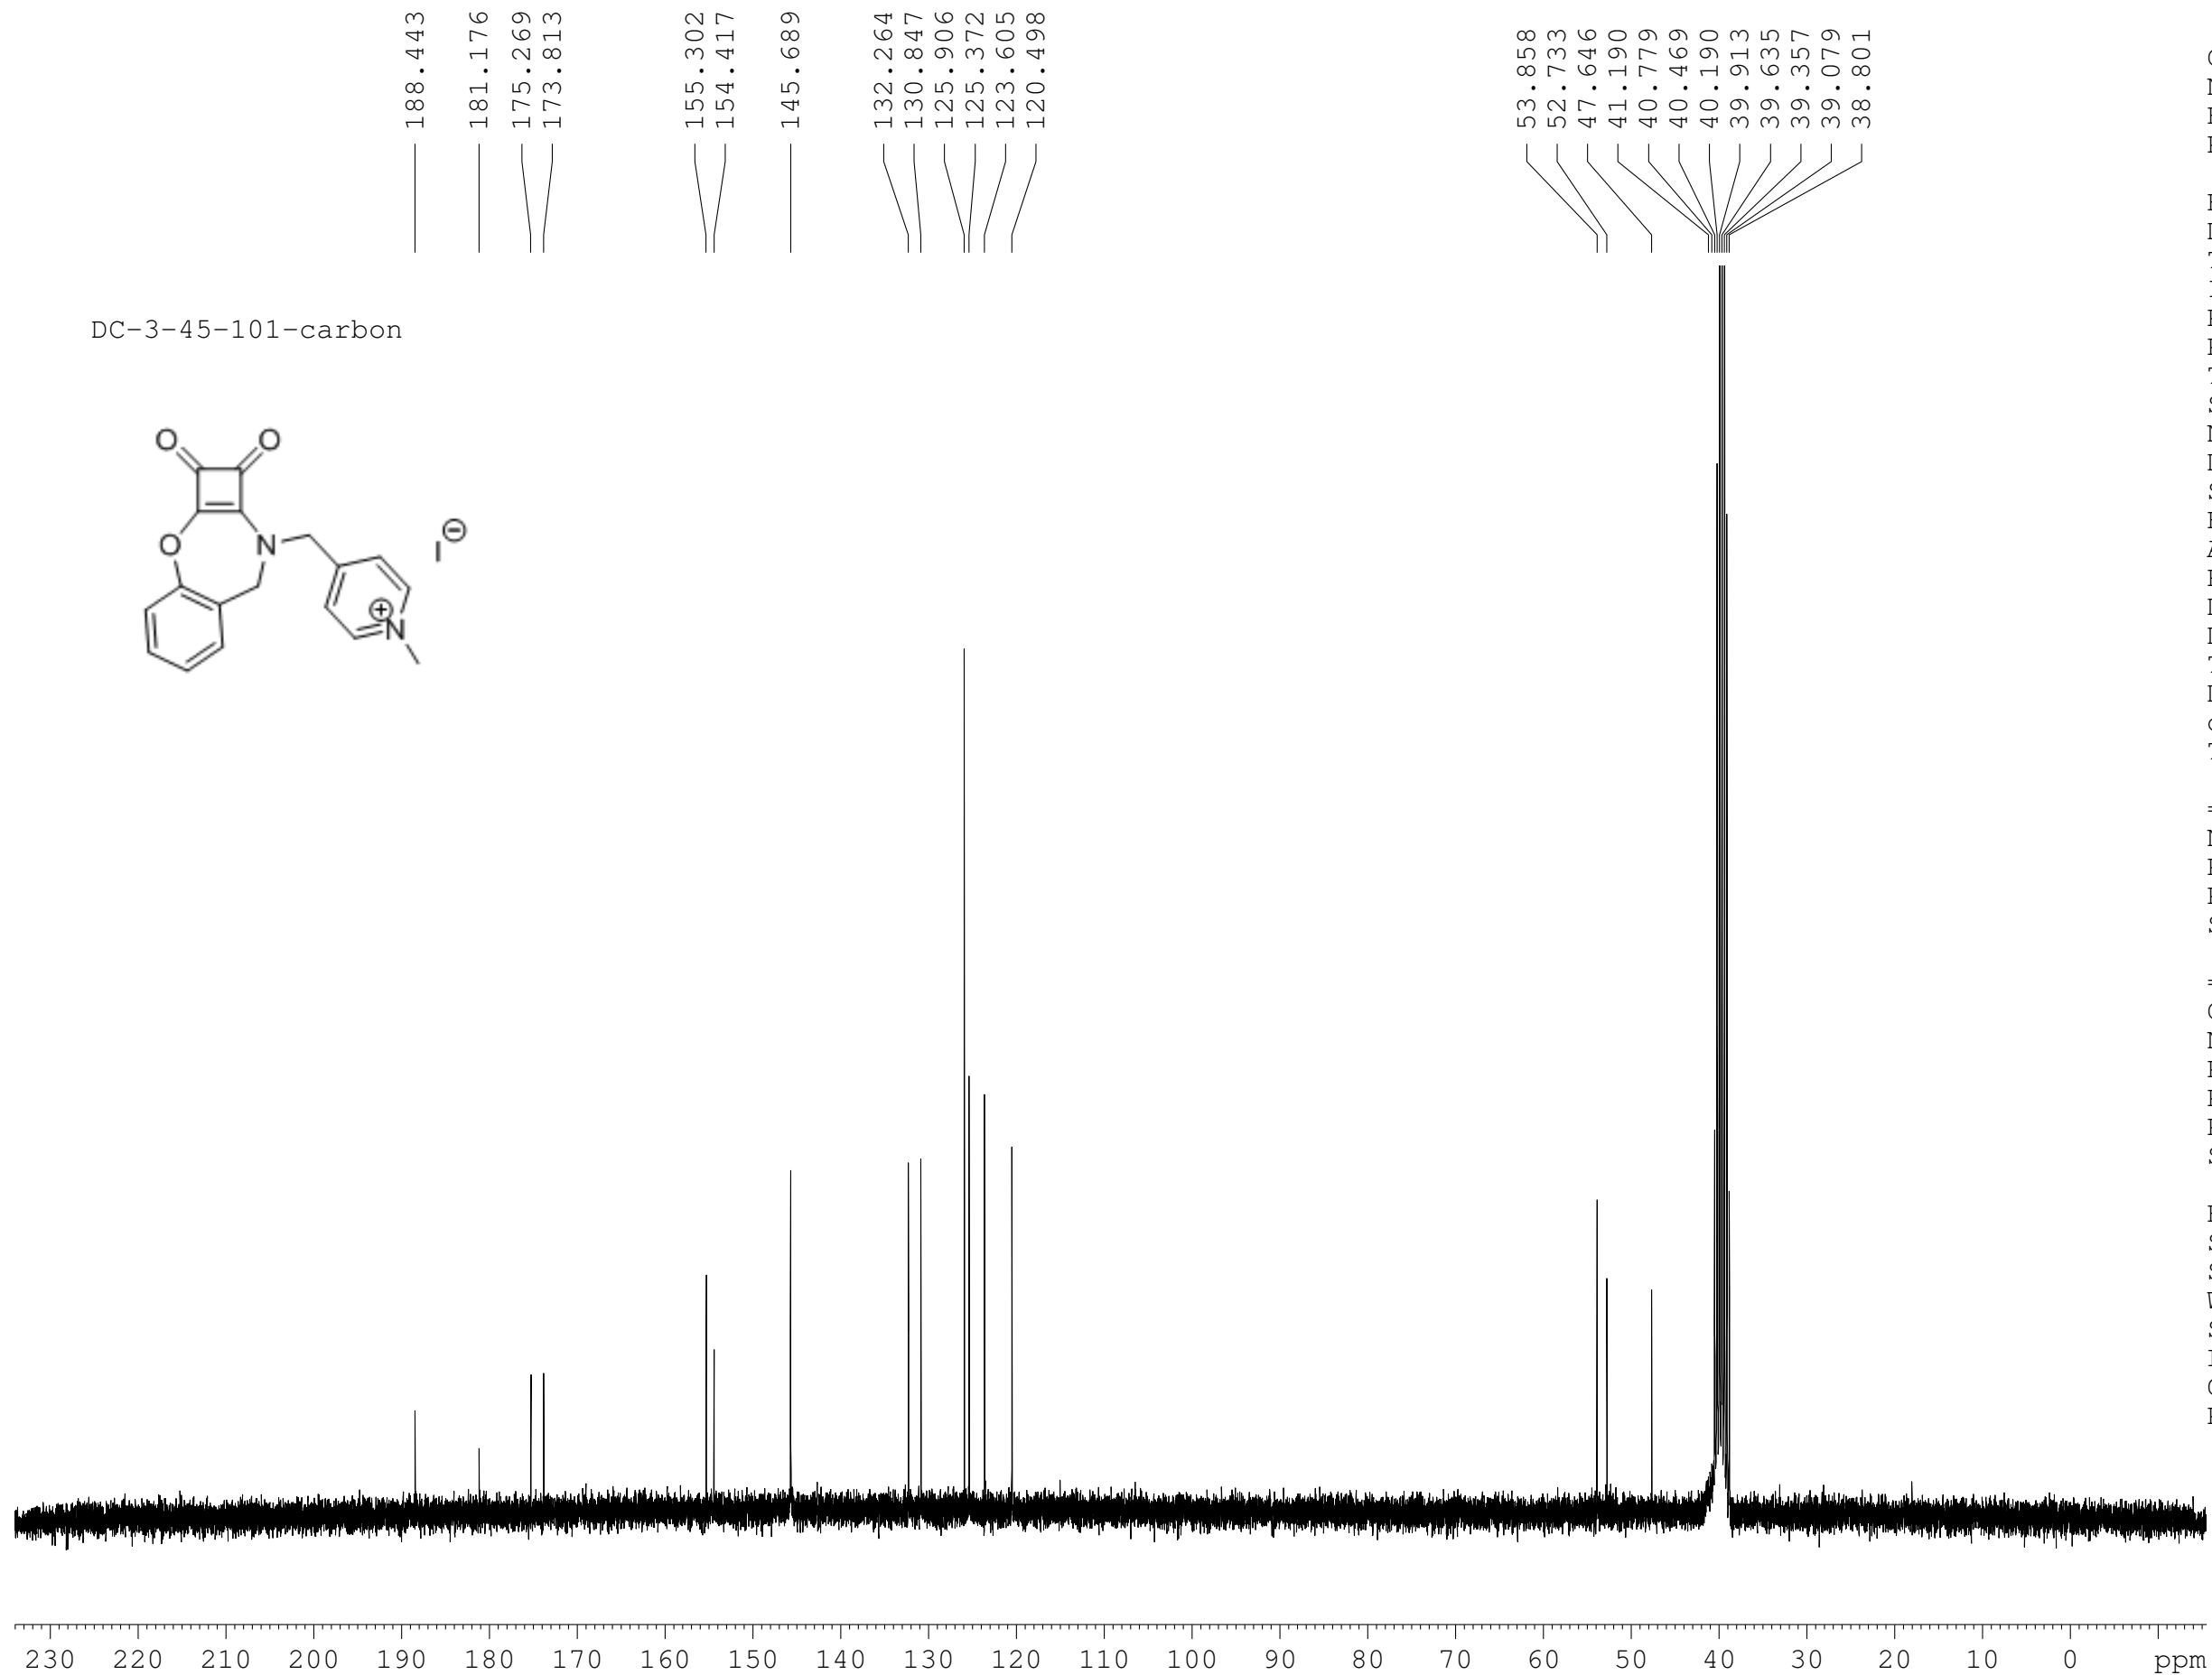

Current Data Parameters  
 NAME DC-3-45-101-carbon  
 EXPNO 1  
 PROCNO 1

F2 - Acquisition Parameters  
 Date\_ 20100513  
 Time 7.53  
 INSTRUM spect  
 PROBHD 5 mm QNP 1H/1  
 PULPROG zgdc  
 TD 65536  
 SOLVENT DMSO  
 NS 13000  
 DS 0  
 SWH 18832.393 Hz  
 FIDRES 0.287360 Hz  
 AQ 1.7400308 sec  
 RG 2048  
 DW 26.550 usec  
 DE 6.00 usec  
 TE 297.2 K  
 D1 1.00000000 sec  
 d11 0.03000000 sec  
 TD0 1

==== CHANNEL f1 =====  
 NUC1 13C  
 P1 11.80 usec  
 PL1 0.00 dB  
 SFO1 75.4760200 MHz

==== CHANNEL f2 =====  
 CPDPRG2 waltz16  
 NUC2 1H  
 PCPD2 95.00 usec  
 PL2 0.00 dB  
 PL12 18.00 dB  
 SFO2 300.1312005 MHz

F2 - Processing parameters  
 SI 32768  
 SF 75.4677751 MHz  
 WDW no  
 SSB 0  
 LB 0.00 Hz  
 GB 0  
 PC 1.00

# Elemental Composition Report

Tolerance = 50.0 PPM / DBE: min = -1.5, max = 80.0

Selected filters: None

Monoisotopic Mass, Even Electron Ions

13 formula(e) evaluated with 1 results within limits (all results (up to 1000) for each mass)

Elements Used:

C: 0-18 H: 0-15 N: 0-2 O: 0-3 Na: 0-1

File name: dc-2-45-103

Instrument: LCT KC366

Method: ESI-TOF

dc-2-45-103c 28 (0.702) AM (Cen,6, 90.00, Ar,6000.0,1222.14,0.70,LS 4); Sm (SG, 2x6.00); Cm (27:28)

Notebook Ref:

Test name: Accurate Mass

Base Peak Mass: 307.10818481

IU Database#:

26-Feb-2010 14:45:30

1: TOF MS ES+  
630

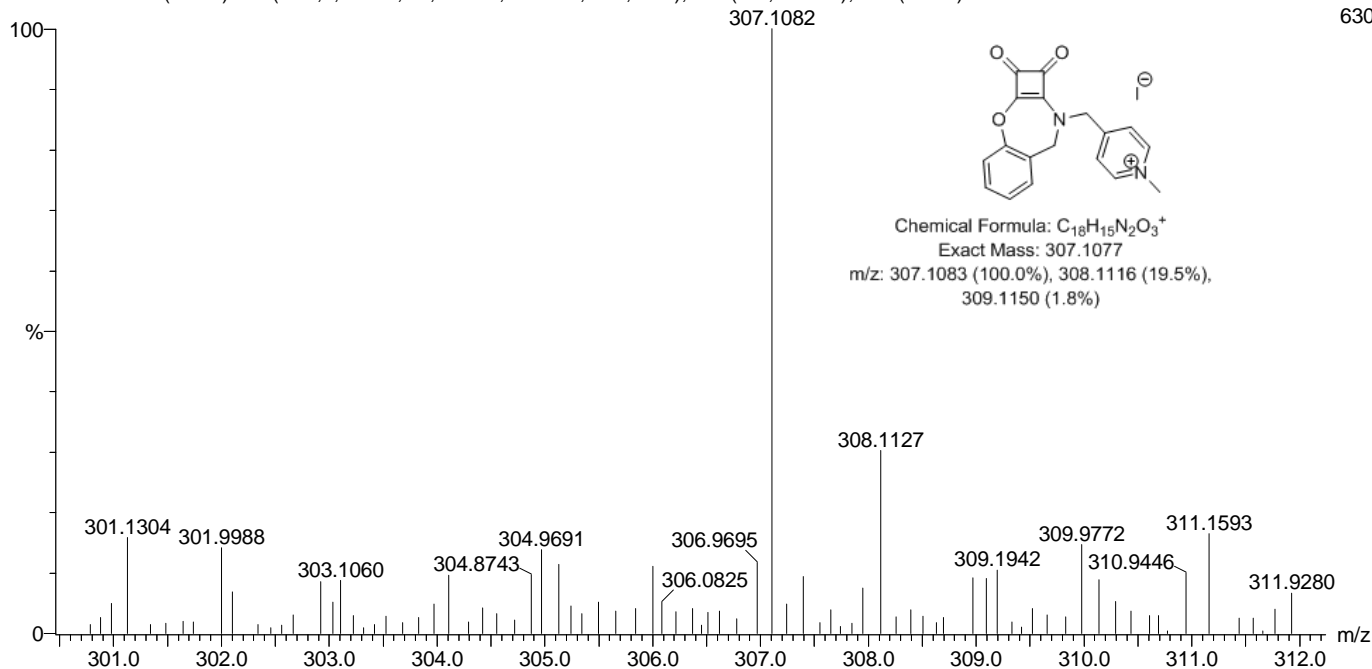

Minimum: 80.00  
 Maximum: 100.00

| Mass     | RA     | Calc. Mass | mDa  | PPM  | DBE  | i-FIT | Formula       |
|----------|--------|------------|------|------|------|-------|---------------|
| 307.1082 | 100.00 | 307.1083   | -0.1 | -0.3 | 12.5 | 21.1  | C18 H15 N2 O3 |

DC-2-65-100

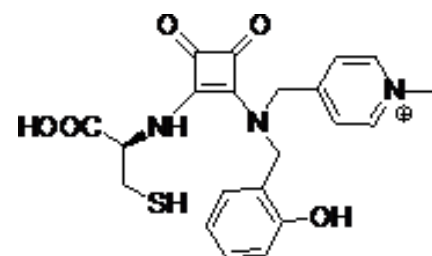

**DC-2-65-1**  
**Chemical Formula: C<sub>21</sub>H<sub>22</sub>N<sub>3</sub>O<sub>5</sub>S<sup>+</sup>**  
**Exact Mass: 428.1275**  
**Molecular Weight: 428.4809**

8.443  
 8.424  
 8.402  
 7.603  
 7.583  
 7.562  
 7.128  
 7.102  
 7.072  
 7.046  
 6.736  
 6.711  
 6.501  
 5.062  
 4.937  
 4.908  
 4.777  
 4.733  
 4.719  
 4.704  
 4.700  
 4.681  
 4.677  
 4.159  
 4.148  
 4.017  
 3.900  
 3.890  
 3.885  
 3.881  
 3.871  
 3.868  
 3.041  
 3.022  
 2.991  
 2.972  
 2.945  
 2.931  
 2.895  
 2.881

Current Data Parameters  
 NAME DC-2-65-100  
 EXPNO 1  
 PROCNO 1

F2 - Acquisition Parameters  
 Date\_ 20100218  
 Time 11.07  
 INSTRUM spect  
 PROBHD 5 mm QNP 1H/1  
 PULPROG zg  
 TD 32768  
 SOLVENT D2O  
 NS 32  
 DS 0  
 SWH 3591.954 Hz  
 FIDRES 0.109618 Hz  
 AQ 4.5613556 sec  
 RG 362  
 DW 139.200 usec  
 DE 54.00 usec  
 TE 298.2 K  
 D1 1.0000000 sec  
 TD0 1

==== CHANNEL f1 =====  
 NUC1 1H  
 P1 9.75 usec  
 PL1 0.00 dB  
 SFO1 300.1315007 MHz

F2 - Processing parameters  
 SI 32768  
 SF 300.1300042 MHz  
 WDW no  
 SSB 0  
 LB 0.00 Hz  
 GB 0  
 PC 1.00

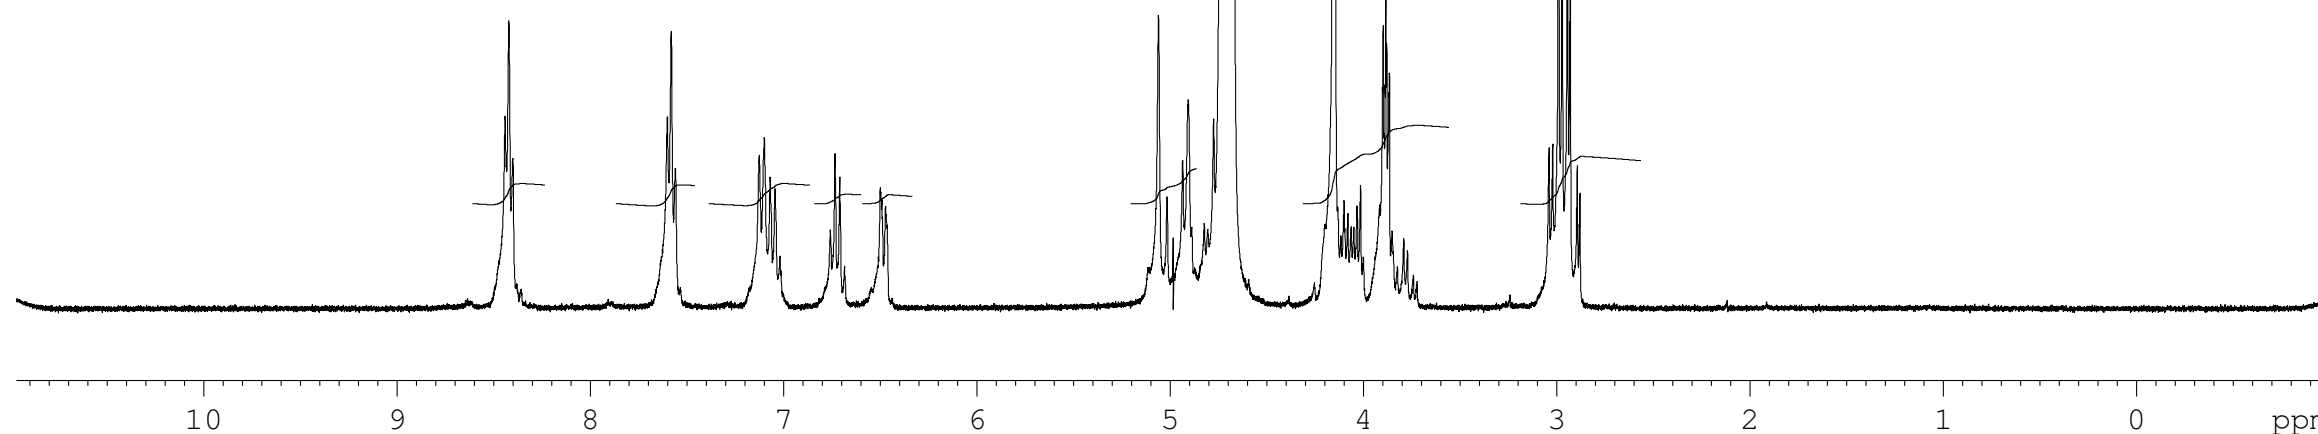

2.120  
 2.062  
 2.103  
 1.000  
 0.818  
 4.008  
 8.716  
 4.900

10 9 8 7 6 5 4 3 2 1 0 ppm

# Elemental Composition Report

Tolerance = 50.0 PPM / DBE: min = -1.5, max = 80.0

Selected filters: None

Monoisotopic Mass, Even Electron Ions

81 formula(e) evaluated with 1 results within limits (all results (up to 1000) for each mass)

Elements Used:

C: 0-21 H: 0-22 N: 0-3 O: 0-5 Na: 0-1 S: 0-1

File name: dc-2-65-1

Notebook Ref:

Instrument: LCT KC366

Test name: Accurate Mass

IU Database#:

26-Feb-2010 12:25:12

Method: ESI-TOF

Base Peak Mass: 428.1283745

dc-2-65-1 32 (0.802) AM (Cen,6, 90.00, Ar,6000.0,1222.14,0.70,LS 4); Sm (SG, 2x6.00); Cm (31:32)

1: TOF MS ES+

730

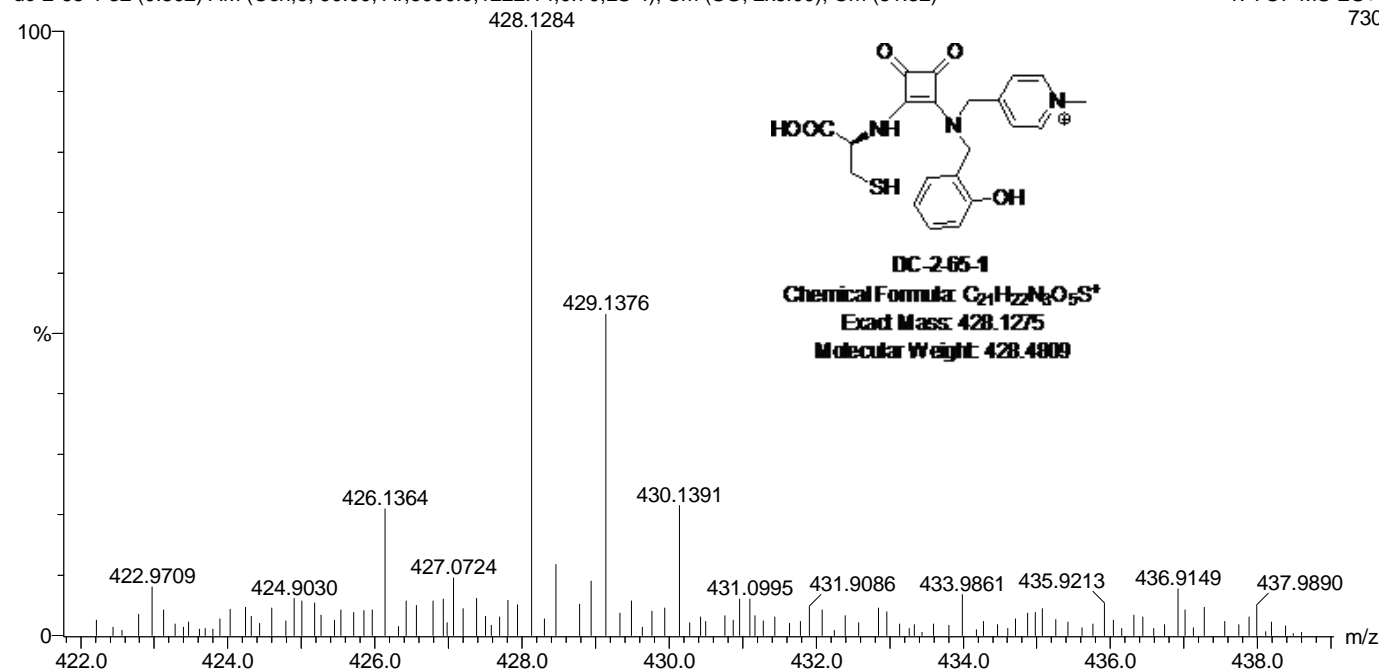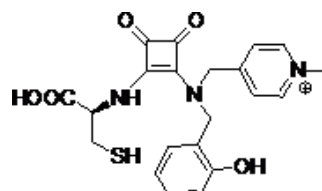

**DC-2-65-1**  
**Chemical Formula: C<sub>21</sub>H<sub>22</sub>N<sub>3</sub>O<sub>5</sub>S<sup>+</sup>**  
**Exact Mass: 428.1275**  
**Molecular Weight: 428.4809**

| Mass     | RA     | Calc. Mass | mDa | PPM | DBE  | i-FIT | Formula                                                         |
|----------|--------|------------|-----|-----|------|-------|-----------------------------------------------------------------|
| 428.1284 | 100.00 | 428.1280   | 0.4 | 0.9 | 12.5 | 68.7  | C <sub>21</sub> H <sub>22</sub> N <sub>3</sub> O <sub>5</sub> S |

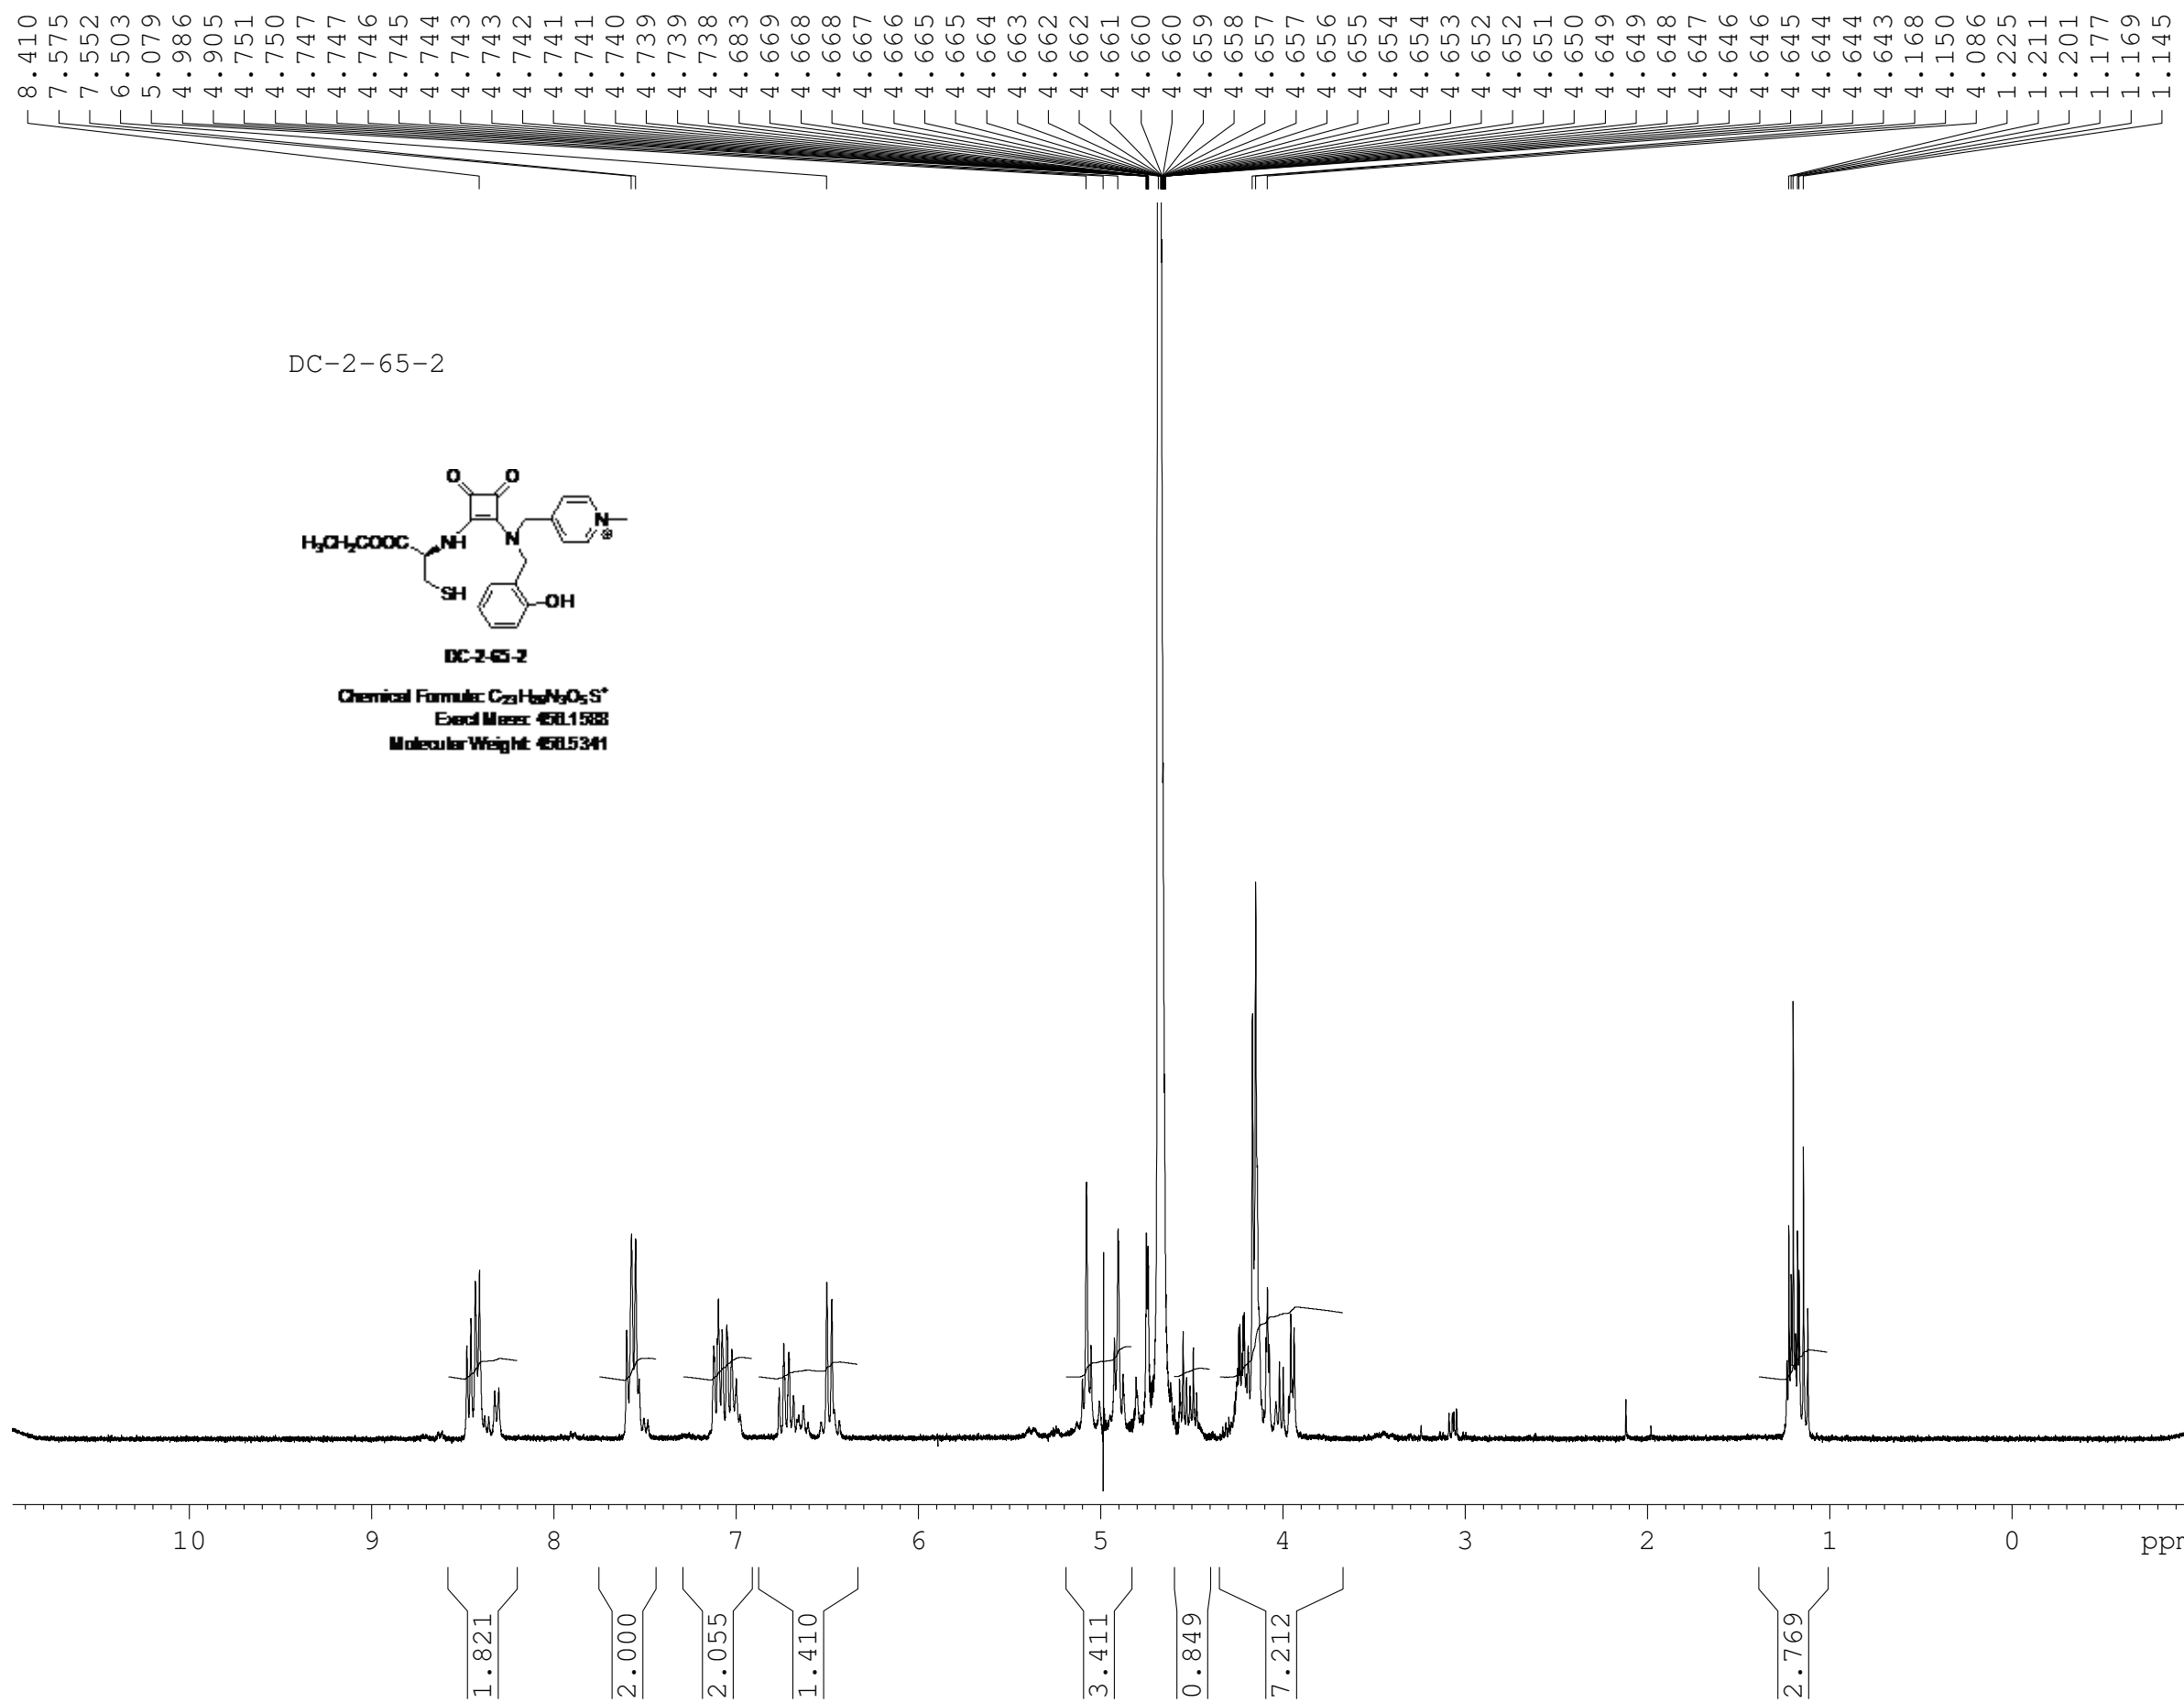

Current Data Parameters  
 NAME DC-2-65-2  
 EXPNO 1  
 PROCNO 1

F2 - Acquisition Parameters  
 Date\_ 20100222  
 Time 9.07  
 INSTRUM spect  
 PROBHD 5 mm QNP 1H/1  
 PULPROG zg  
 TD 32768  
 SOLVENT D2O  
 NS 32  
 DS 0  
 SWH 3591.954 Hz  
 FIDRES 0.109618 Hz  
 AQ 4.5613556 sec  
 RG 362  
 DW 139.200 usec  
 DE 54.00 usec  
 TE 298.2 K  
 D1 1.0000000 sec  
 TD0 1

==== CHANNEL f1 =====  
 NUC1 1H  
 P1 9.75 usec  
 PL1 0.00 dB  
 SFO1 300.1315007 MHz

F2 - Processing parameters  
 SI 32768  
 SF 300.1300042 MHz  
 WDW no  
 SSB 0  
 LB 0.00 Hz  
 GB 0  
 PC 1.00



# Elemental Composition Report

Tolerance = 50.0 PPM / DBE: min = -1.5, max = 80.0

Selected filters: None

Monoisotopic Mass, Even Electron Ions

81 formula(e) evaluated with 1 results within limits (all results (up to 1000) for each mass)

Elements Used:

C: 0-23 H: 0-26 N: 0-3 O: 0-5 Na: 0-1 S: 0-1

File name: dc-2-65-2

Notebook Ref:

Instrument: LCT KC366

Test name: Accurate Mass

IU Database#:

26-Feb-2010 12:21:02

Method: ESI-TOF

Base Peak Mass: 456.15817261

dc-2-65-2 30 (0.752) AM (Cen,6, 90.00, Ar,6000.0,1222.14,0.70,LS 4); Sm (SG, 2x6.00); Cm (29:30)

1: TOF MS ES+  
4.00e3

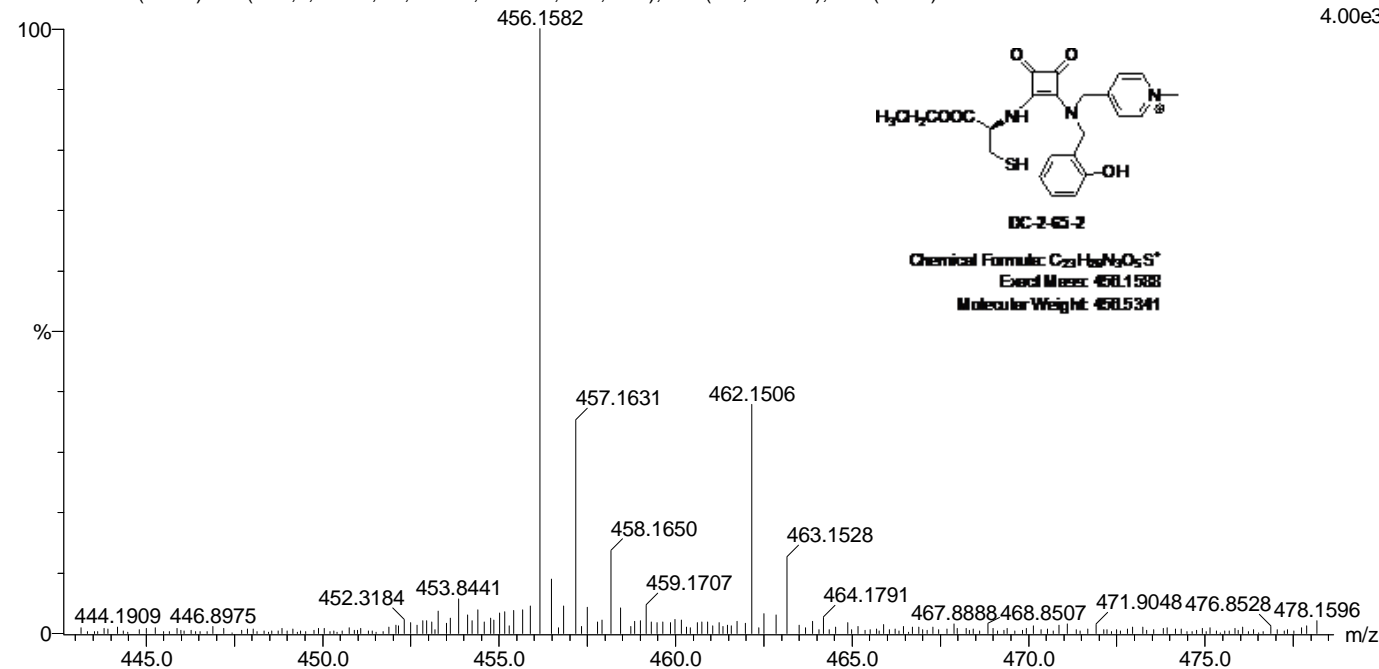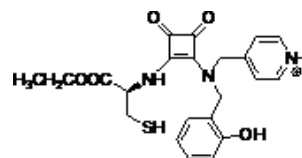

DC-2-65-2

Chemical Formula: C<sub>23</sub>H<sub>26</sub>N<sub>3</sub>O<sub>5</sub>S<sup>+</sup>

Exact Mass: 456.1588

Molecular Weight: 456.5341

Minimum: 80.00  
 Maximum: 100.00

-1.5  
 80.0

| Mass     | RA     | Calc. Mass | mDa  | PPM  | DBE  | i-FIT | Formula                                                         |
|----------|--------|------------|------|------|------|-------|-----------------------------------------------------------------|
| 456.1582 | 100.00 | 456.1593   | -1.1 | -2.4 | 12.5 | 44.9  | C <sub>23</sub> H <sub>26</sub> N <sub>3</sub> O <sub>5</sub> S |

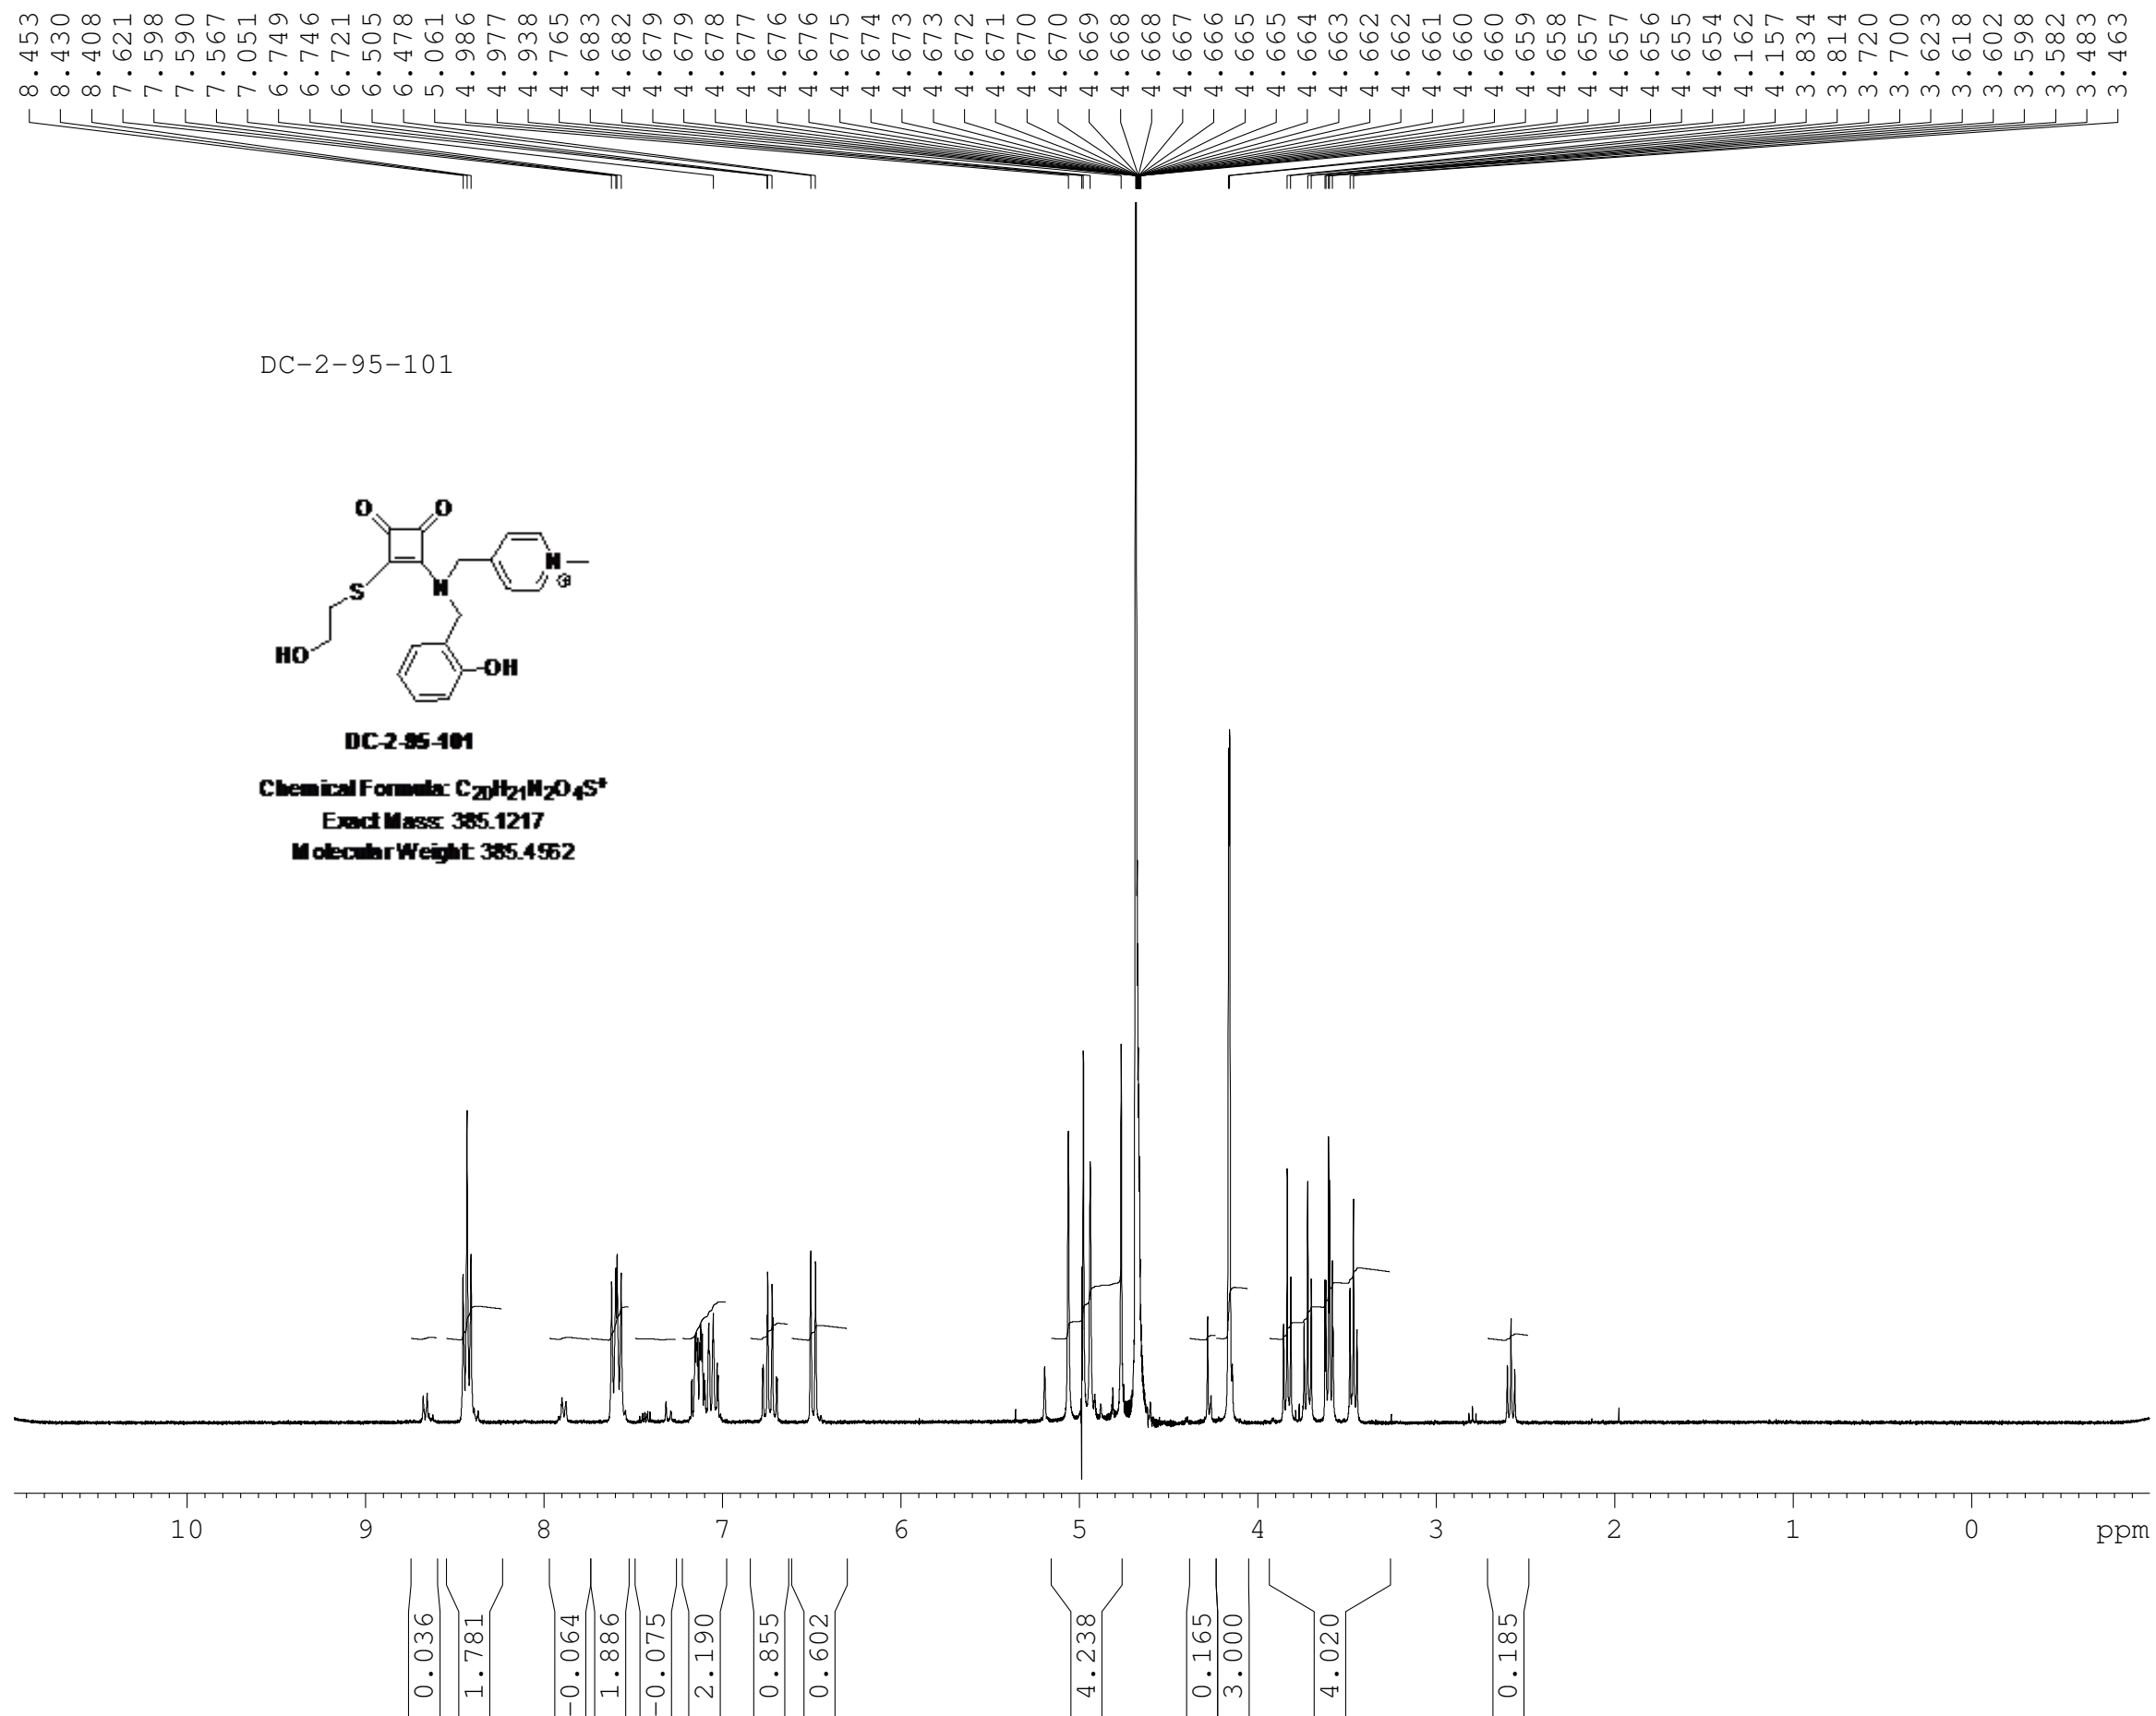

Current Data Parameters  
 NAME DC-2-95-101  
 EXPNO 1  
 PROCNO 1

F2 - Acquisition Parameters  
 Date\_ 20100226  
 Time 18.36  
 INSTRUM spect  
 PROBHD 5 mm QNP 1H/1  
 PULPROG zg  
 TD 32768  
 SOLVENT D2O  
 NS 32  
 DS 0  
 SWH 3591.954 Hz  
 FIDRES 0.109618 Hz  
 AQ 4.5613556 sec  
 RG 645.1  
 DW 139.200 usec  
 DE 54.00 usec  
 TE 299.2 K  
 D1 1.00000000 sec  
 TD0 1

==== CHANNEL f1 =====  
 NUC1 1H  
 P1 9.75 usec  
 PL1 0.00 dB  
 SFO1 300.1315007 MHz

F2 - Processing parameters  
 SI 32768  
 SF 300.1300042 MHz  
 WDW no  
 SSB 0  
 LB 0.00 Hz  
 GB 0  
 PC 1.00

File name: dc-2-95-101  
Instrument: LCT KC366  
Method: ESI-TOF

Notebook Ref: 24821  
Test name: Accurate Mass  
Base Peak Mass: 387.13412476

IU Database#: 24821  
06-May-2010 11:34:47

dc-2-94-201 (0.035) Is (0.50,0.50) C<sub>20</sub>H<sub>21</sub>N<sub>2</sub>O<sub>4</sub>S

1: TOF MS ES+  
7.47e12

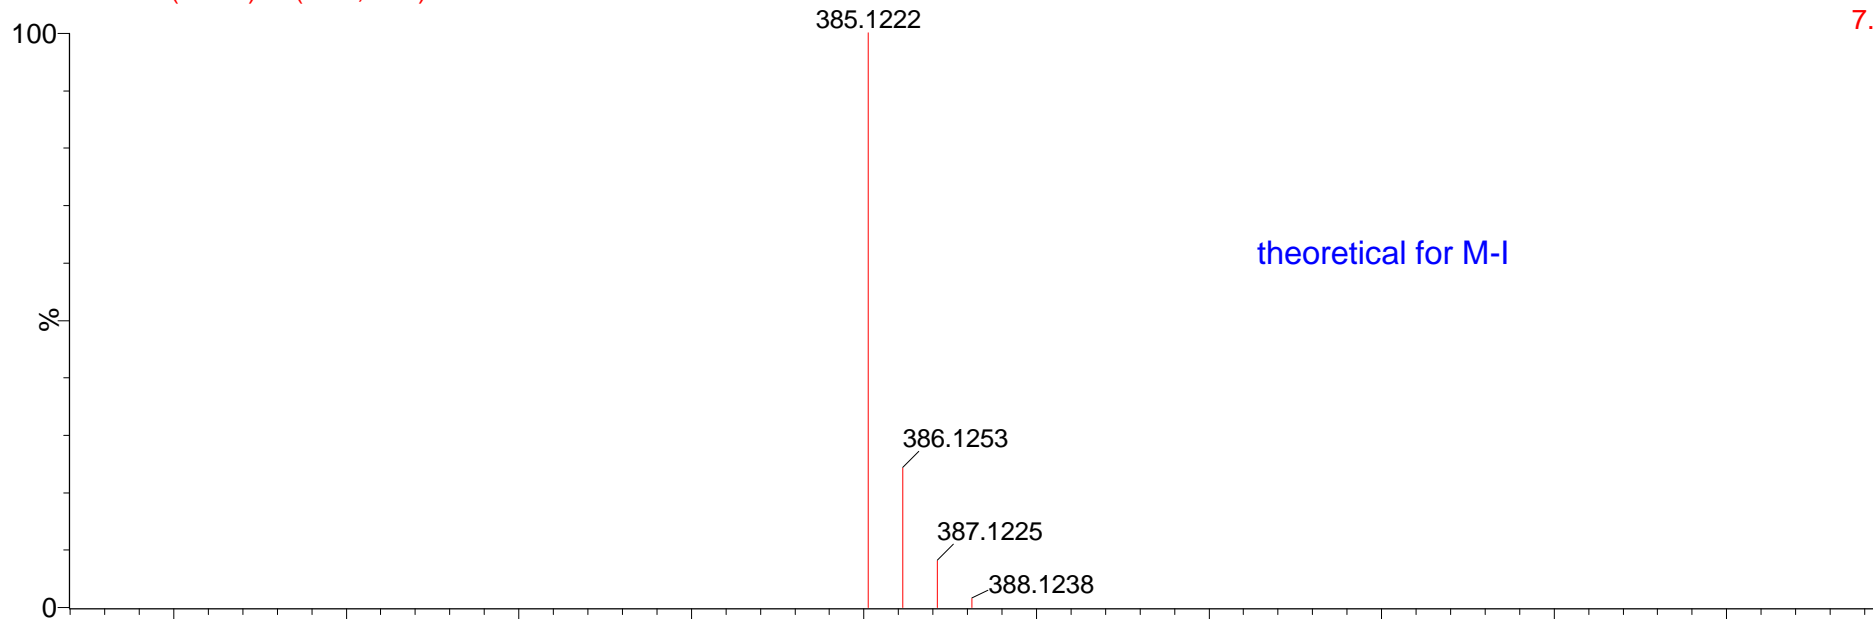

dc-2-95-101 64 (1.603) AM (Cen,8, 90.00, Ar,4000.0,1222.14,0.70,LS 6); Sm (SG, 2x4.00); Cm (63:71)

1: TOF MS ES+  
1.89e4

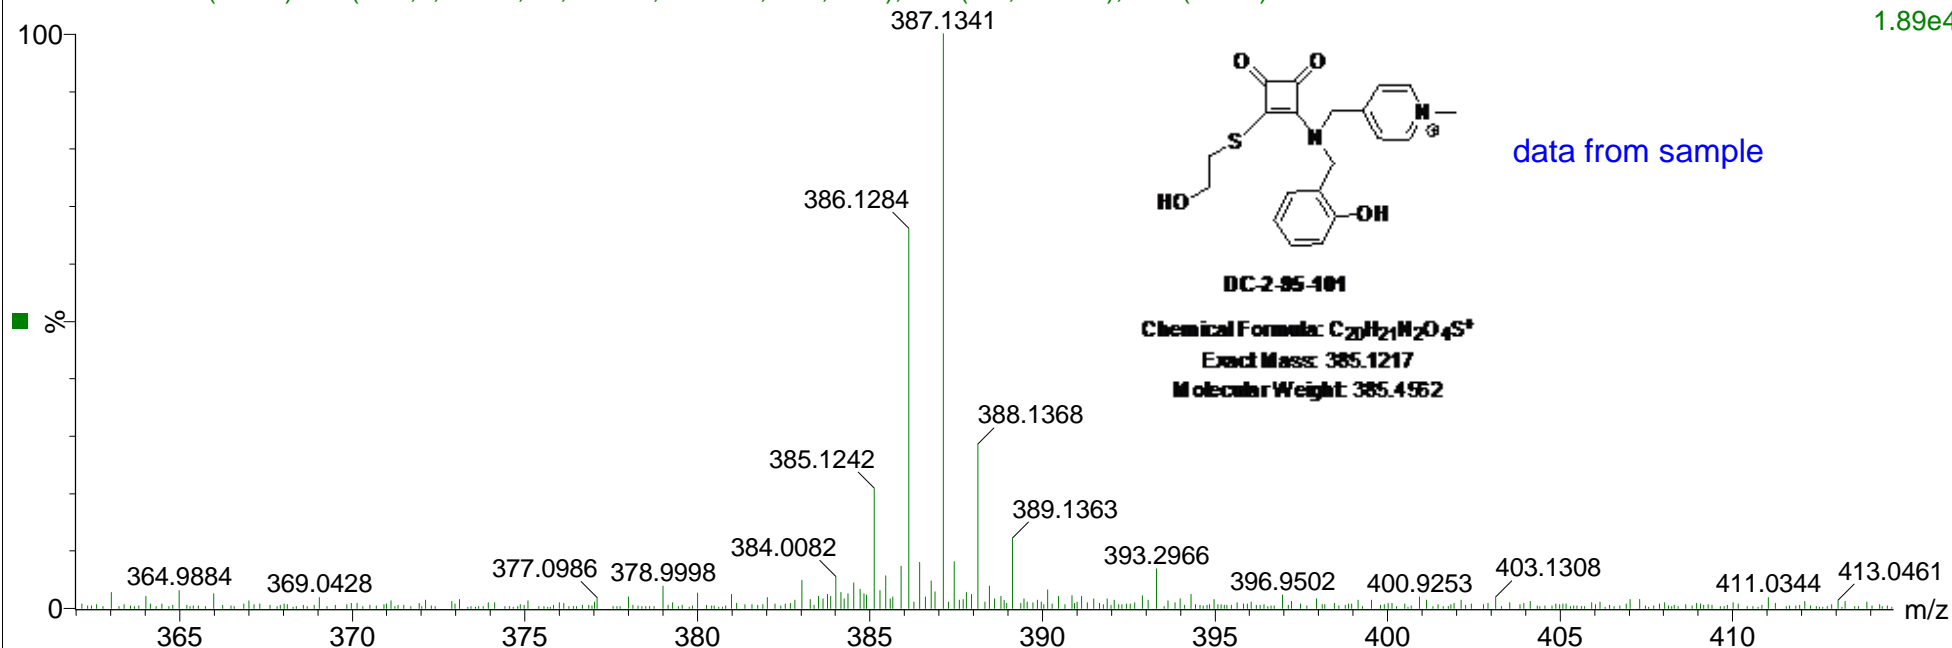

8.477  
 8.454  
 8.424  
 8.402  
 8.377  
 8.292  
 8.270  
 7.615  
 7.596  
 7.573  
 7.554  
 7.545  
 7.538  
 7.516  
 7.080  
 7.055  
 7.032  
 7.026  
 7.007  
 6.981  
 6.935  
 6.913  
 6.693  
 6.668  
 6.643  
 6.614  
 6.594  
 6.572  
 6.548  
 6.525  
 6.499  
 6.463  
 4.954  
 4.913  
 4.883  
 4.815  
 4.753  
 4.683  
 4.607  
 4.266  
 4.175  
 4.150  
 4.140  
 4.087  
 4.067  
 3.974  
 3.793  
 3.772  
 3.751  
 3.649  
 3.039  
 3.017  
 2.995  
 2.713  
 2.690  
 2.667  
 2.645

Dc-2-117-101

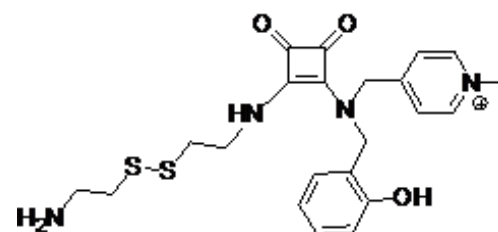

**DC-2-117-101**  
 $C_{22}H_{27}N_4O_3S_2^+$   
 Exact Mass: 459.1519

Current Data Parameters  
 NAME Dc-2-117-101  
 EXPNO 1  
 PROCNO 1

F2 - Acquisition Parameters  
 Date\_ 20100310  
 Time 15.18  
 INSTRUM spect  
 PROBHD 5 mm QNP 1H/1  
 PULPROG zg  
 TD 32768  
 SOLVENT D2O  
 NS 32  
 DS 0  
 SWH 3591.954 Hz  
 FIDRES 0.109618 Hz  
 AQ 4.5613556 sec  
 RG 256  
 DW 139.200 usec  
 DE 54.00 usec  
 TE 299.2 K  
 D1 1.0000000 sec  
 TD0 1

==== CHANNEL f1 =====  
 NUC1 1H  
 P1 9.75 usec  
 PL1 0.00 dB  
 SFO1 300.1315007 MHz

F2 - Processing parameters  
 SI 32768  
 SF 300.1300042 MHz  
 WDW no  
 SSB 0  
 LB 0.00 Hz  
 GB 0  
 PC 1.00

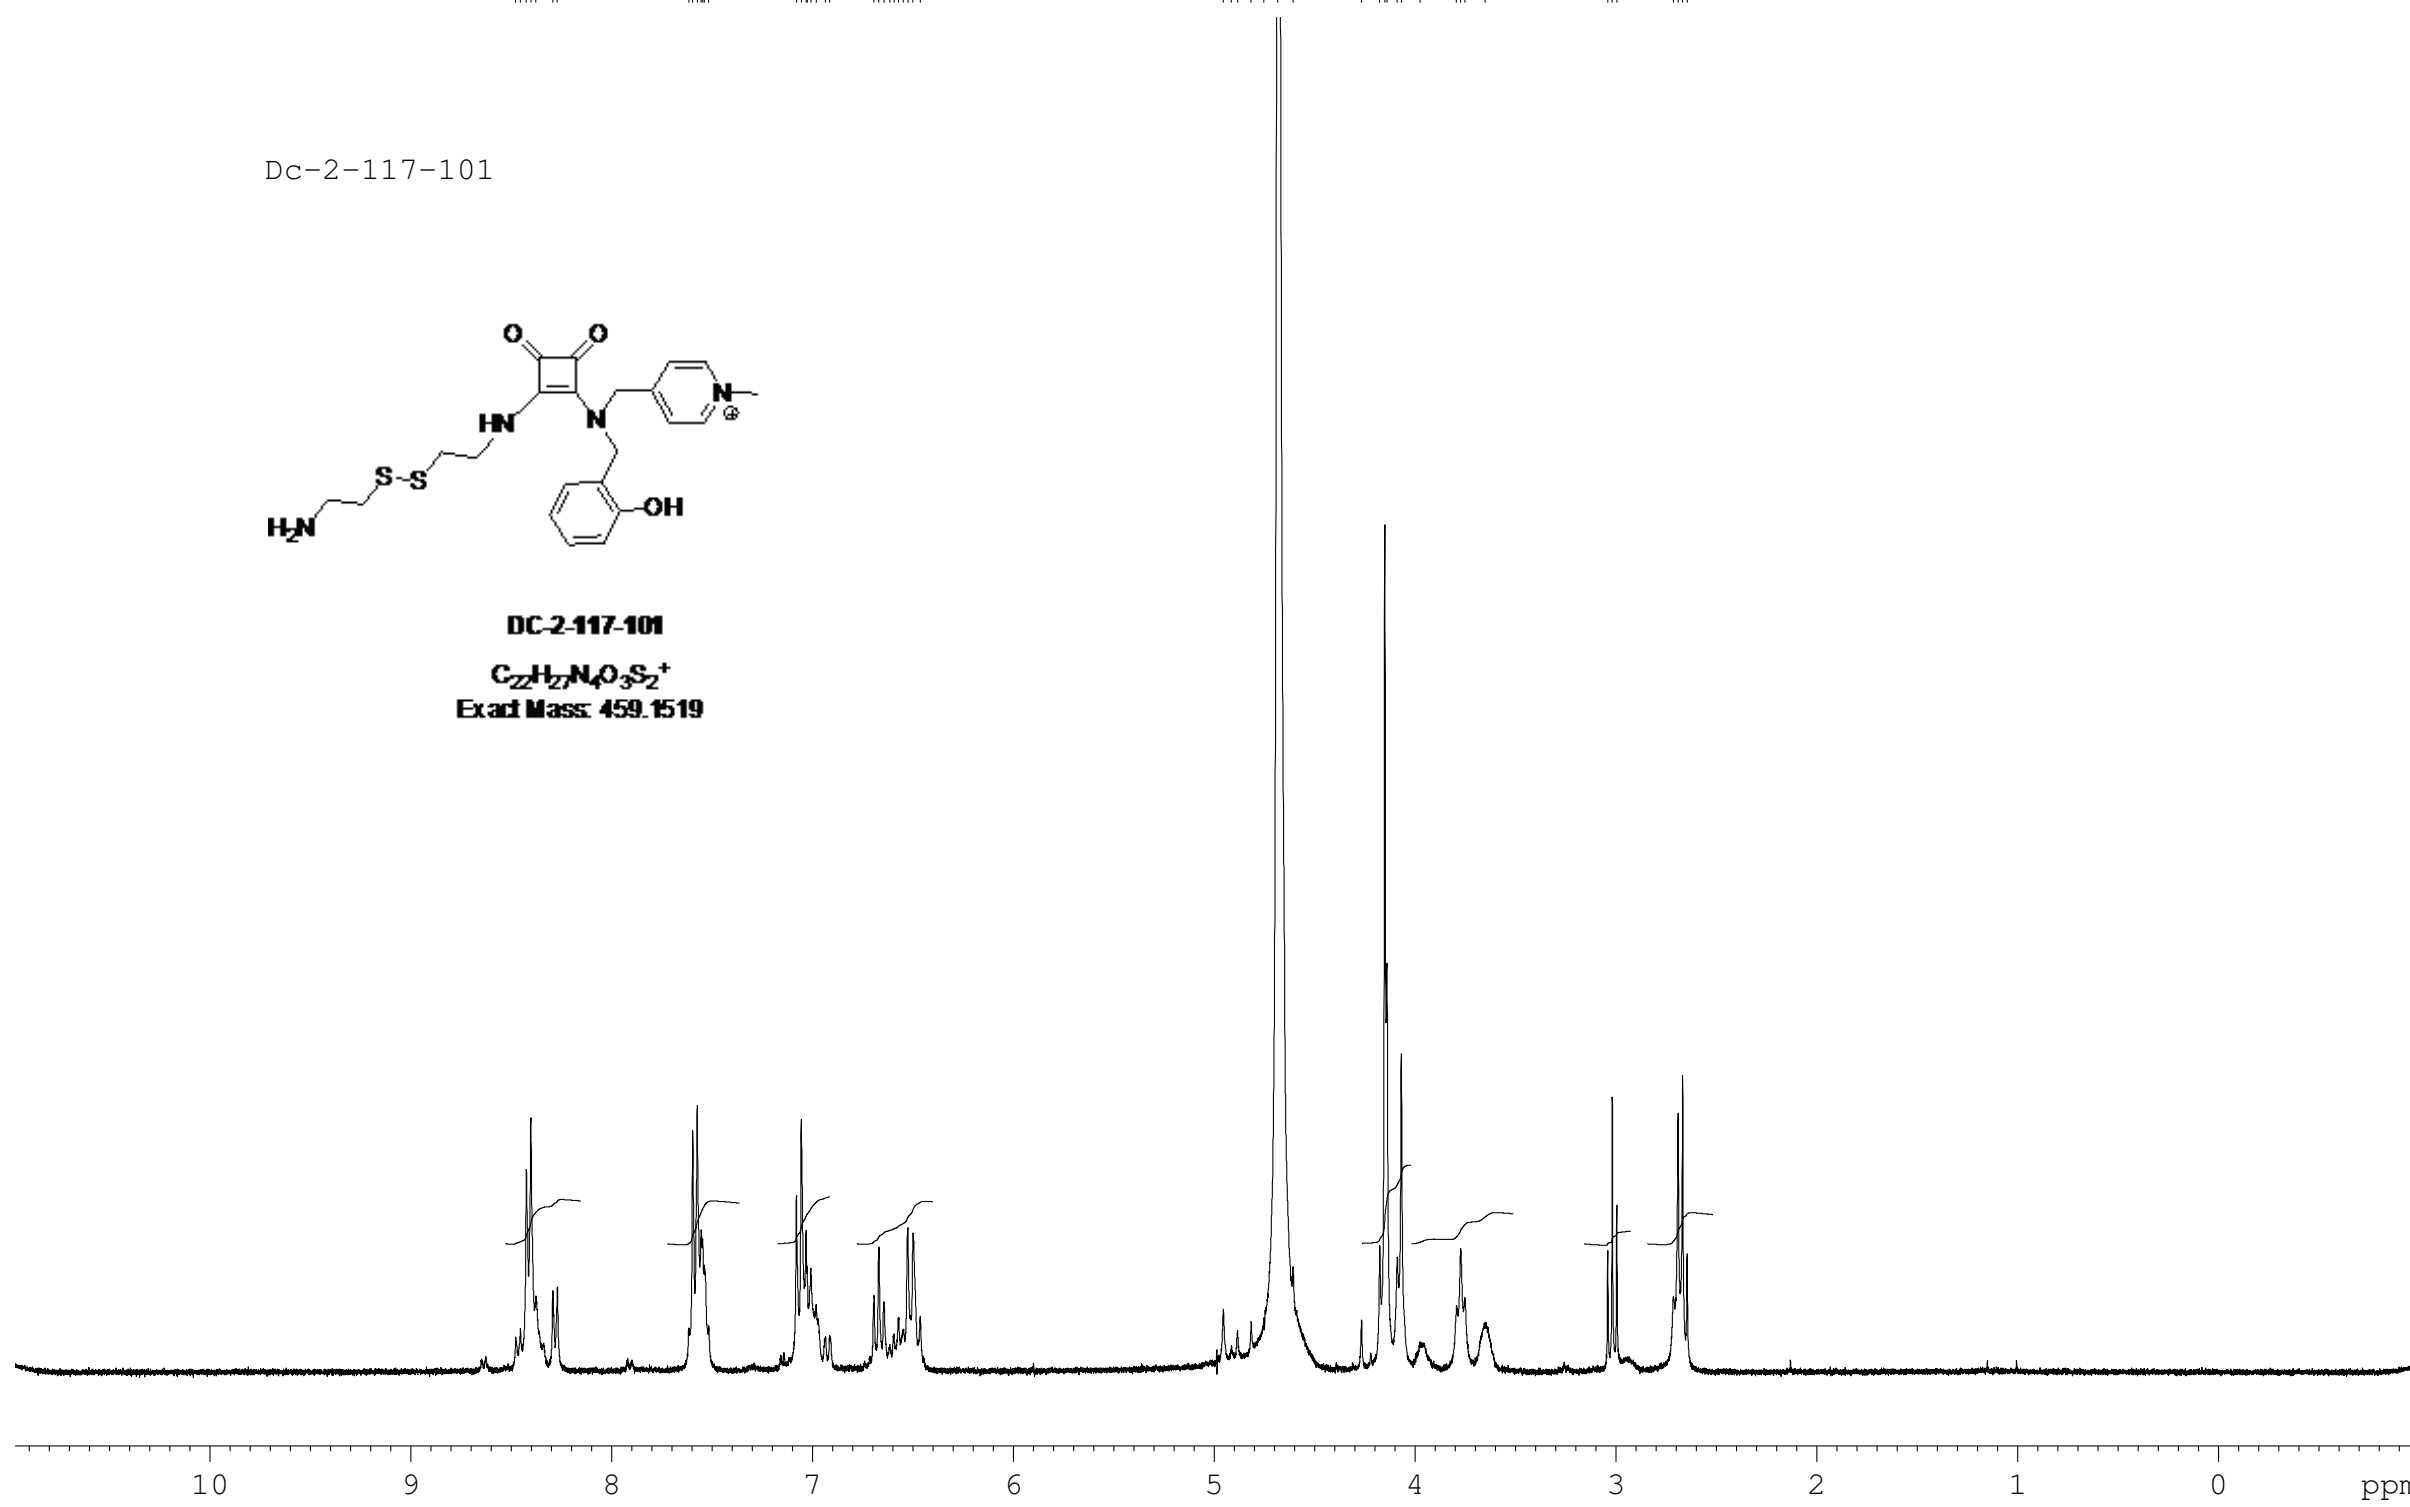

2.039  
 1.938  
 2.256  
 2.000  
 3.755  
 1.431  
 0.607  
 1.388

File name: dc-2-117-101B  
Instrument: LCT KC366  
Method: ESI-TOF

Notebook Ref: 24952  
Test name: Accurate Mass  
Base Peak Mass: 459.15127563

IU Database#: 24952  
13-May-2010 12:39:59

dc-3-86-101 (0.035) Is (0.50,0.50) C<sub>20</sub>H<sub>22</sub>N<sub>3</sub>O<sub>3</sub>S

1: TOF MS ES+  
7.45e12

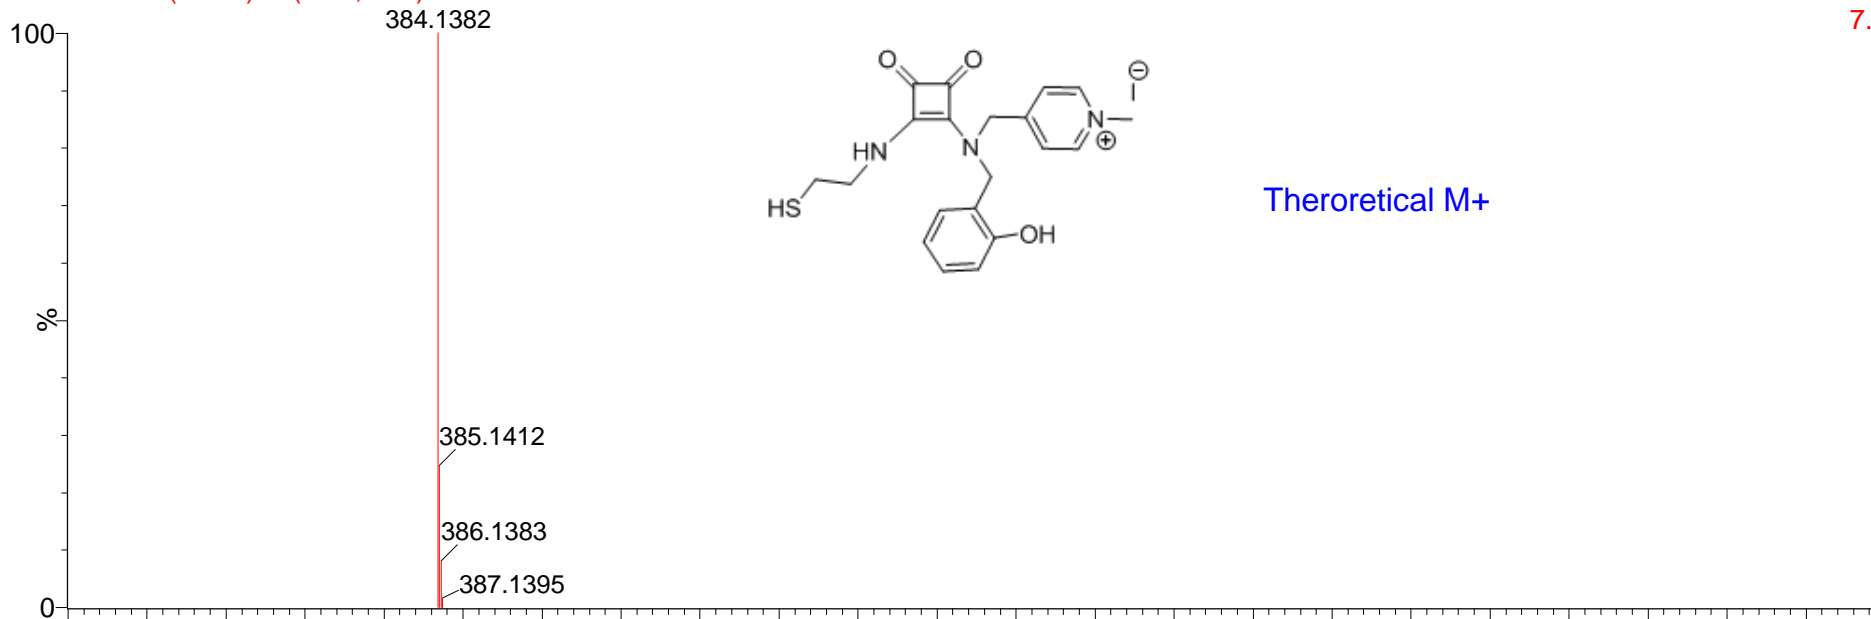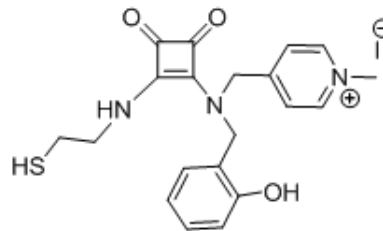

dc-2-117-101B 34 (0.852) AM (Cen,8, 90.00, Ar,5000.0,1222.14,0.70,LS 6); Sm (SG, 2x4.00); Cm (23:40)

1: TOF MS ES+  
7.15e4

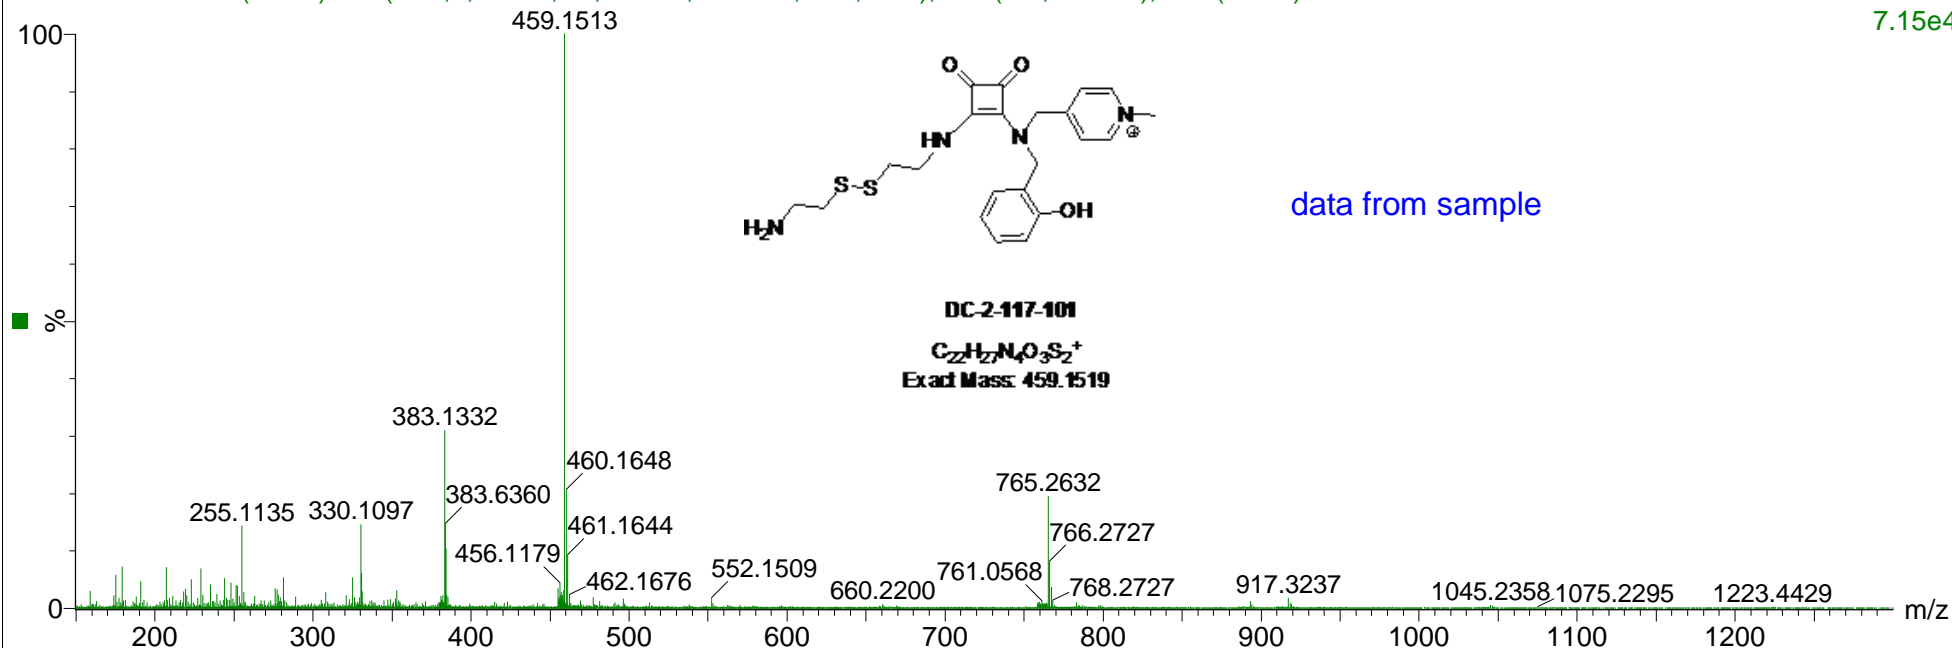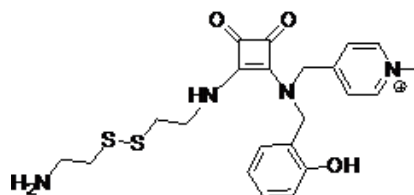

DC-2-117-101  
C<sub>22</sub>H<sub>27</sub>N<sub>4</sub>O<sub>3</sub>S<sub>2</sub><sup>+</sup>  
Exact Mass: 459.1519

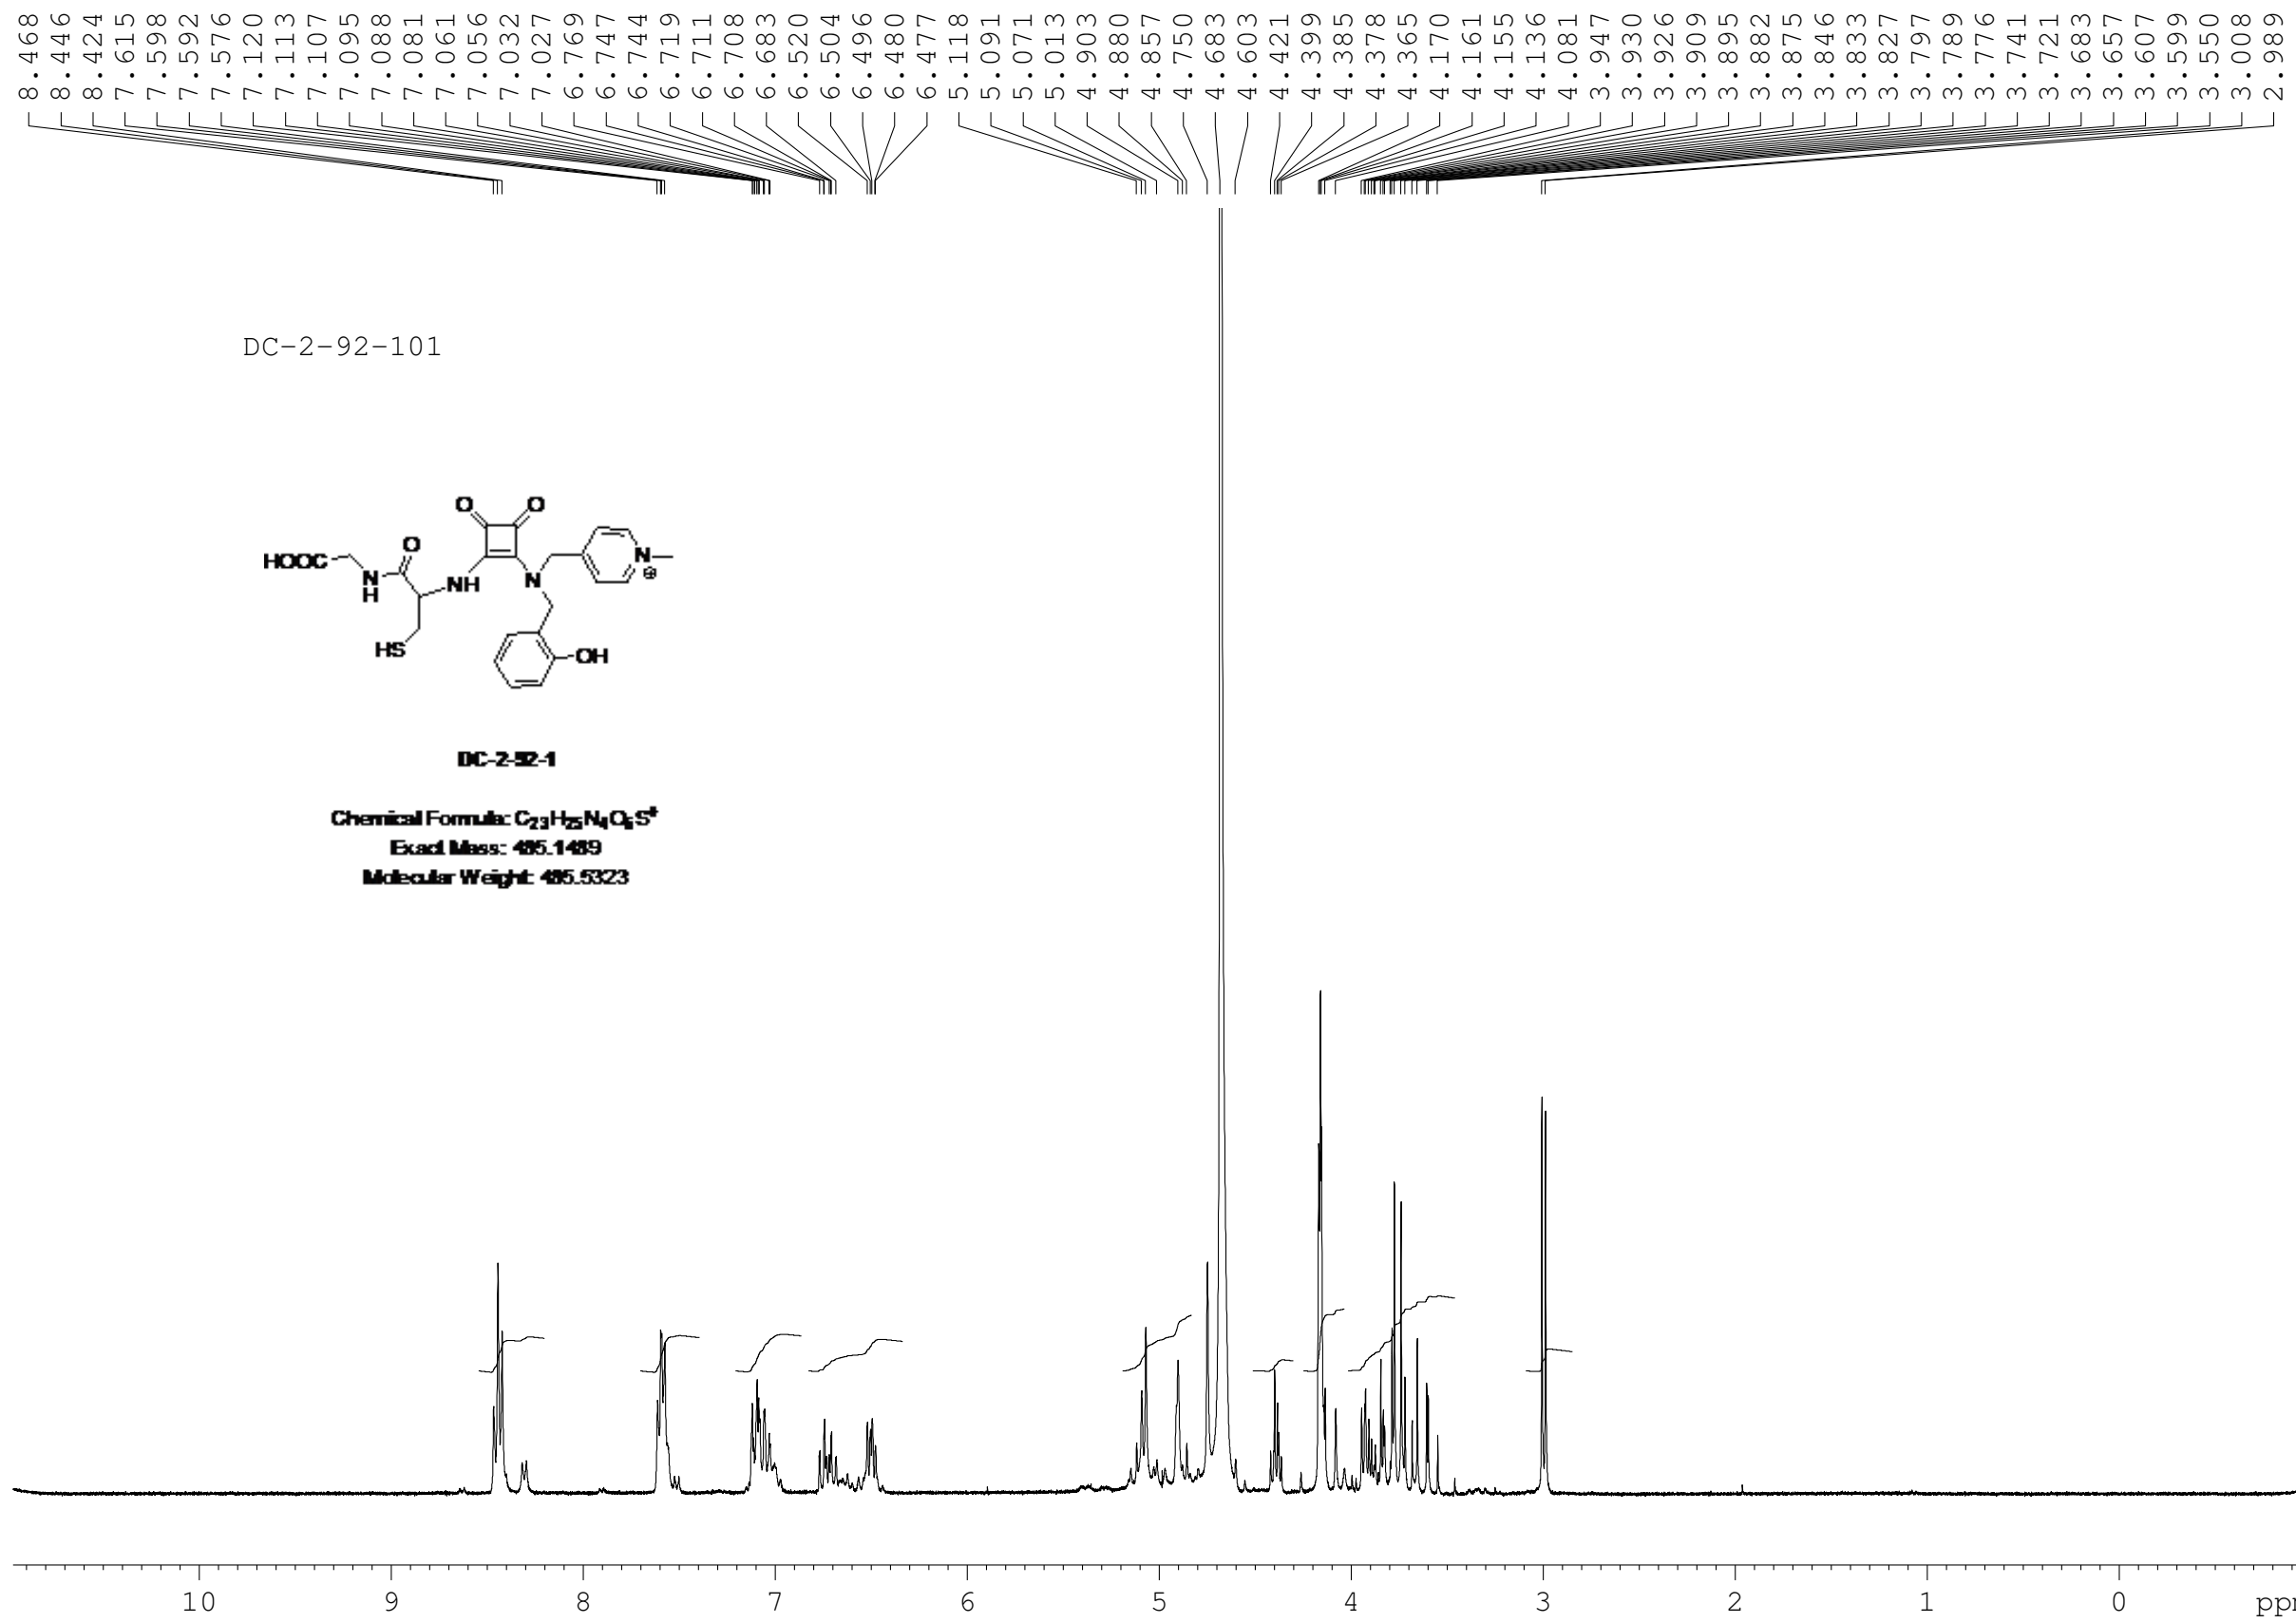

8.468  
 8.446  
 8.424  
 7.615  
 7.598  
 7.592  
 7.576  
 7.120  
 7.113  
 7.107  
 7.095  
 7.088  
 7.081  
 7.061  
 7.056  
 7.032  
 7.027  
 6.769  
 6.747  
 6.744  
 6.719  
 6.711  
 6.708  
 6.683  
 6.520  
 6.504  
 6.496  
 6.480  
 6.477  
 5.118  
 5.091  
 5.071  
 5.013  
 4.903  
 4.880  
 4.857  
 4.750  
 4.683  
 4.603  
 4.421  
 4.399  
 4.385  
 4.378  
 4.365  
 4.170  
 4.161  
 4.155  
 4.136  
 4.081  
 3.947  
 3.930  
 3.926  
 3.909  
 3.895  
 3.882  
 3.875  
 3.846  
 3.833  
 3.827  
 3.797  
 3.789  
 3.776  
 3.741  
 3.721  
 3.683  
 3.657  
 3.607  
 3.599  
 3.550  
 3.008  
 2.989

DC-2-92-101

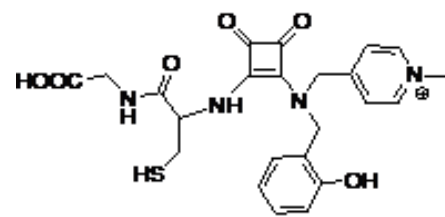

DC-2-92-1

Chemical Formula:  $C_{23}H_{25}N_4O_3S^+$   
 Exact Mass: 485.1489  
 Molecular Weight: 485.5323

Current Data Parameters  
 NAME DC-2-92-101  
 EXPNO 1  
 PROCNO 1

F2 - Acquisition Parameters  
 Date\_ 20100226  
 Time 14.48  
 INSTRUM spect  
 PROBHD 5 mm QNP 1H/1  
 PULPROG zg  
 TD 32768  
 SOLVENT D2O  
 NS 32  
 DS 0  
 SWH 3591.954 Hz  
 FIDRES 0.109618 Hz  
 AQ 4.5613556 sec  
 RG 256  
 DW 139.200 usec  
 DE 54.00 usec  
 TE 299.2 K  
 D1 1.0000000 sec  
 TD0 1

==== CHANNEL f1 =====  
 NUC1 1H  
 P1 9.75 usec  
 PL1 0.00 dB  
 SFO1 300.1315007 MHz

F2 - Processing parameters  
 SI 32768  
 SF 300.1300042 MHz  
 WDW no  
 SSB 0  
 LB 0.00 Hz  
 GB 0  
 PC 1.00

2.211  
 2.256  
 2.379  
 2.000  
 3.787  
 0.685  
 4.236  
 4.974  
 1.297

## Elemental Composition Report

### Multiple Mass Analysis: 2 mass(es) processed

Tolerance = 10.0 PPM / DBE: min = -1.5, max = 80.0

Selected filters: None

Monoisotopic Mass, Even Electron Ions

31200 formula(e) evaluated with 3 results within limits (all results (up to 1000) for each mass)

Elements Used:

C: 23-23 N: 0-4 O: 0-6 Na: 0-1 S: 0-1 2H: 1-5 1H: 1-29

File name: dc-2-92-101

Instrument: LCT KC366

Method: ESI-TOF

dc-2-92-101 31 (0.785) AM (Cen,6, 90.00, Ar,4000.0,922.36,0.70,LS 4); Sm (SG, 2x4.00); Cm (29:45)

Notebook Ref: 24694

Test name: Accurate Mass

Base Peak Mass: 486.15707397

IU Database#: 24694

28-Apr-2010 12:17:42

1: TOF MS ES+

1.44e4

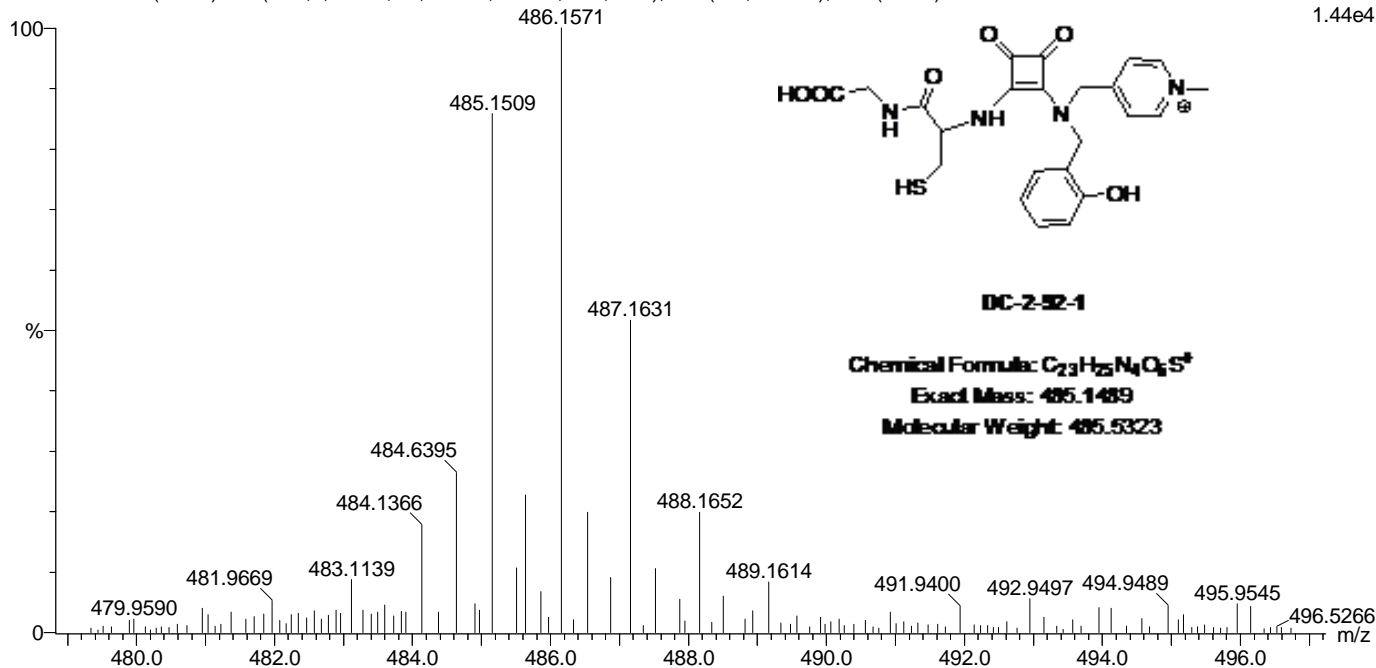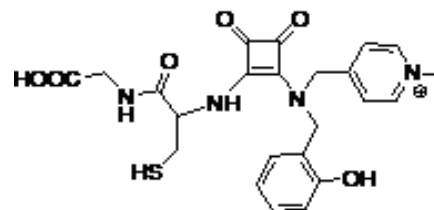

**DC-2-92-1**

**Chemical Formula: C<sub>23</sub>H<sub>25</sub>N<sub>4</sub>O<sub>6</sub>S<sup>+</sup>**

**Exact Mass: 486.1489**

**Molecular Weight: 486.5323**

| Mass     | RA     | Calc. Mass | mDa | PPM | DBE  | i-FIT  | Formula                 |
|----------|--------|------------|-----|-----|------|--------|-------------------------|
| 485.1509 | 85.78  | 485.1464   | 4.5 | 9.3 | 14.5 | 8216.9 | C23 N4 O6 S 2H2<br>1H21 |
| 486.1571 | 100.00 | 486.1558   | 1.3 | 2.7 | 13.5 | 953.5  | C23 N4 O6 S 2H<br>1H24  |
|          |        | 486.1527   | 4.4 | 9.1 | 14.5 | 2915.8 | C23 N4 O6 S 2H3<br>1H20 |

8.656  
 8.634  
 8.435  
 8.419  
 8.398  
 7.878  
 7.857  
 7.569  
 7.547  
 7.284  
 7.146  
 7.133  
 7.099  
 7.094  
 7.081  
 7.075  
 7.056  
 7.051  
 7.024  
 6.740  
 6.715  
 6.684  
 6.484  
 6.473  
 6.458  
 6.446  
 5.171  
 5.045  
 5.021  
 4.974  
 4.905  
 4.865  
 4.801  
 4.784  
 4.773  
 4.755  
 4.700  
 4.688  
 4.635  
 4.259  
 4.149  
 4.137  
 4.096  
 4.080  
 4.048  
 4.033  
 3.865  
 3.808  
 3.721  
 3.695  
 3.677  
 3.553  
 3.526  
 3.506  
 3.478  
 2.838  
 2.819  
 2.813  
 2.438  
 2.414  
 2.387  
 2.353  
 2.325  
 2.084  
 2.066  
 2.044  
 2.019  
 1.994

Current Data Parameters  
 NAME DC-3-82-101-5min  
 EXPNO 1  
 PROCNO 1

F2 - Acquisition Parameters  
 Date\_ 20100503  
 Time 17.31  
 INSTRUM spect  
 PROBHD 5 mm QNP 1H/1  
 PULPROG zg  
 TD 32768  
 SOLVENT D2O  
 NS 32  
 DS 0  
 SWH 4789.272 Hz  
 FIDRES 0.146157 Hz  
 AQ 3.4210291 sec  
 RG 512  
 DW 104.400 usec  
 DE 54.00 usec  
 TE 296.2 K  
 D1 1.00000000 sec  
 TD0 1

DC-3-82-101-5min

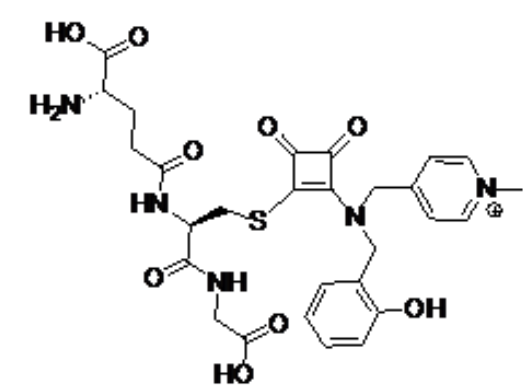

DC-3-82-101

Chemical Formula:  $C_{28}H_{32}N_5O_9S^+$   
 Exact Mass: 614.1915  
 Molecular Weight: 614.6462

==== CHANNEL f1 =====  
 NUC1 1H  
 P1 9.75 usec  
 PL1 0.00 dB  
 SFO1 300.1324000 MHz

F2 - Processing parameters  
 SI 32768  
 SF 300.1300024 MHz  
 WDW no  
 SSB 0  
 LB 0.00 Hz  
 GB 0  
 PC 1.00

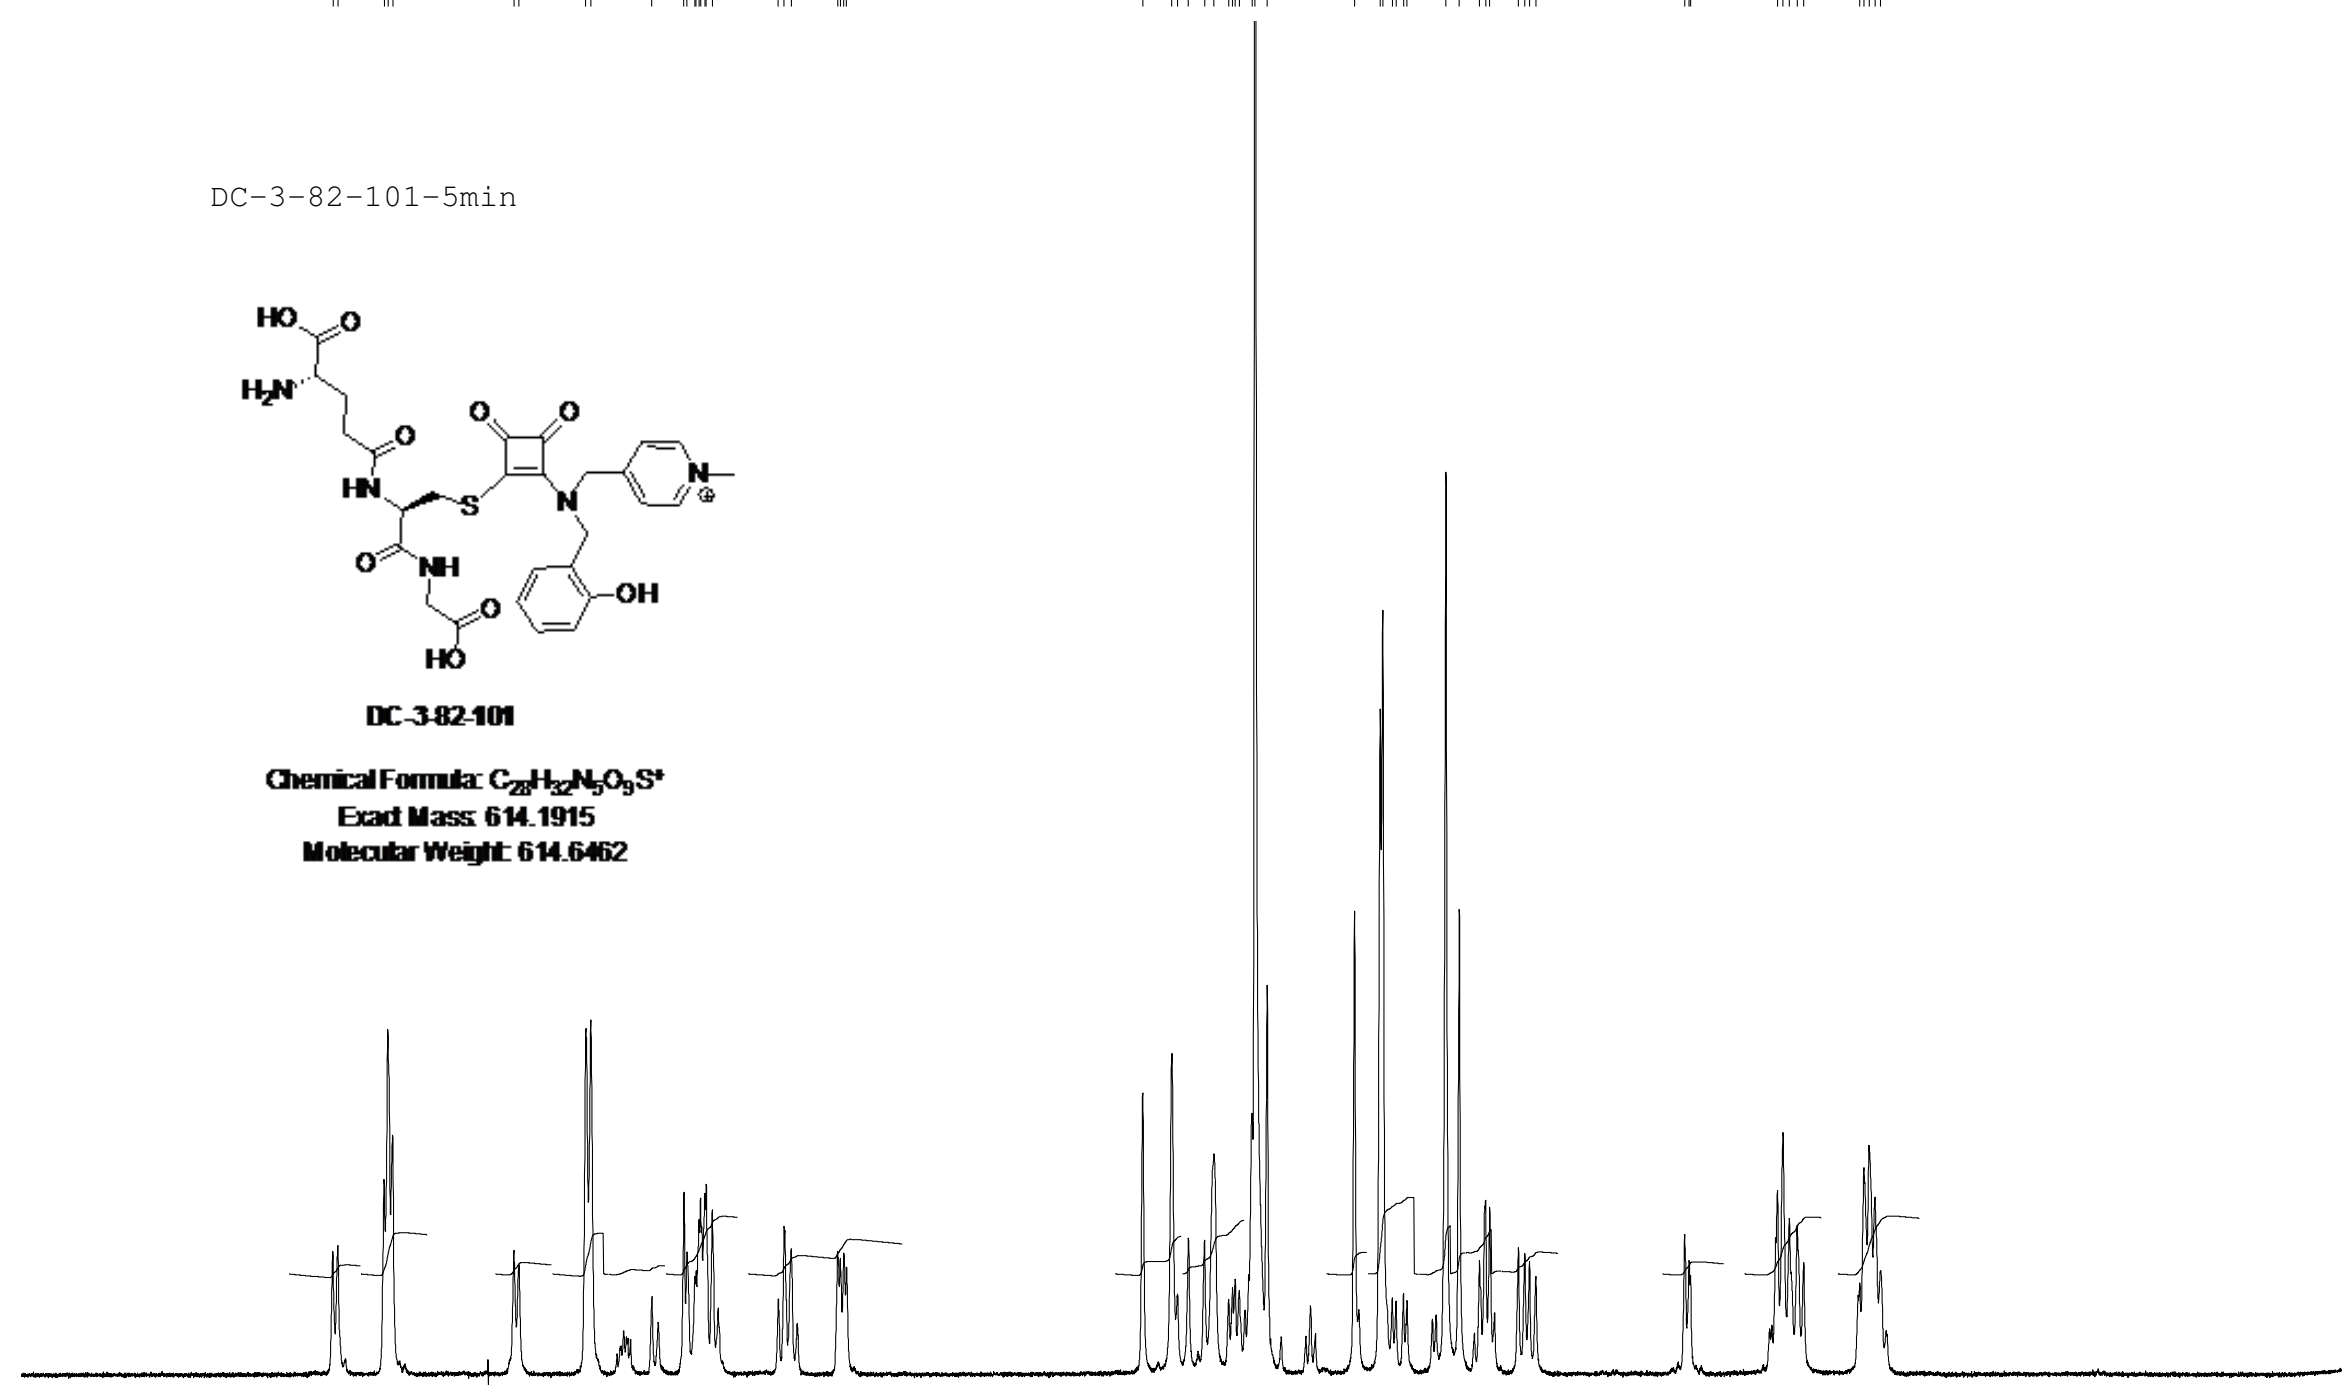

9.5 9.0 8.5 8.0 7.5 7.0 6.5 6.0 5.5 5.0 4.5 4.0 3.5 3.0 2.5 2.0 1.5 1.0 0.5 ppm

0.287  
 1.407  
 0.322  
 1.436  
 0.292  
 2.030  
 1.076  
 1.344  
 1.935  
 0.765  
 2.738  
 2.471  
 1.691  
 0.738  
 0.362  
 2.021  
 2.000



8.427  
 8.411  
 8.405  
 8.389  
 7.558  
 7.538  
 7.090  
 7.076  
 7.070  
 7.065  
 7.051  
 7.045  
 7.040  
 7.019  
 7.013  
 6.731  
 6.709  
 6.706  
 6.700  
 6.679  
 6.675  
 6.476  
 6.468  
 6.465  
 6.452  
 6.441  
 6.438  
 5.037  
 5.018  
 4.970  
 4.902  
 4.855  
 4.794  
 4.778  
 4.766  
 4.750  
 4.708  
 4.688  
 4.140  
 4.128  
 4.091  
 4.075  
 4.043  
 4.027  
 3.862  
 3.806  
 3.692  
 3.675  
 3.547  
 3.519  
 3.499  
 3.471  
 2.431  
 2.408  
 2.402  
 2.380  
 2.373  
 2.348  
 2.340  
 2.319  
 2.077  
 2.055  
 2.050  
 2.034  
 2.028  
 2.012  
 2.006  
 1.987

DC-3-82-101-1h

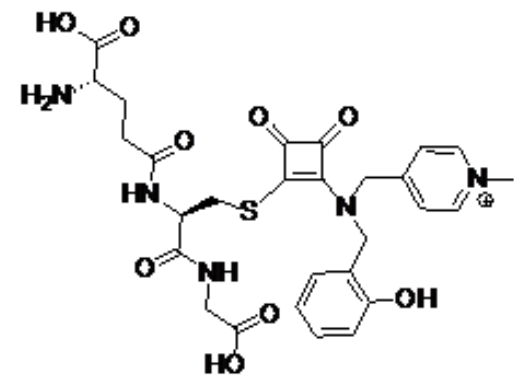

DC-3-82-101

Chemical Formula:  $C_{28}H_{32}N_5O_9S^+$   
 Exact Mass: 614.1915  
 Molecular Weight: 614.6462

Current Data Parameters  
 NAME DC-3-82-101-1h  
 EXPNO 1  
 PROCNO 1

F2 - Acquisition Parameters  
 Date\_ 20100504  
 Time 8.55  
 INSTRUM spect  
 PROBHD 5 mm QNP 1H/1  
 PULPROG zg  
 TD 32768  
 SOLVENT D2O  
 NS 32  
 DS 0  
 SWH 4789.272 Hz  
 FIDRES 0.146157 Hz  
 AQ 3.4210291 sec  
 RG 512  
 DW 104.400 usec  
 DE 54.00 usec  
 TE 683.2 K  
 D1 1.00000000 sec  
 TD0 1

==== CHANNEL f1 =====  
 NUC1 1H  
 P1 9.75 usec  
 PL1 0.00 dB  
 SFO1 300.1324000 MHz

F2 - Processing parameters  
 SI 32768  
 SF 300.1300024 MHz  
 WDW no  
 SSB 0  
 LB 0.00 Hz  
 GB 0  
 PC 1.00

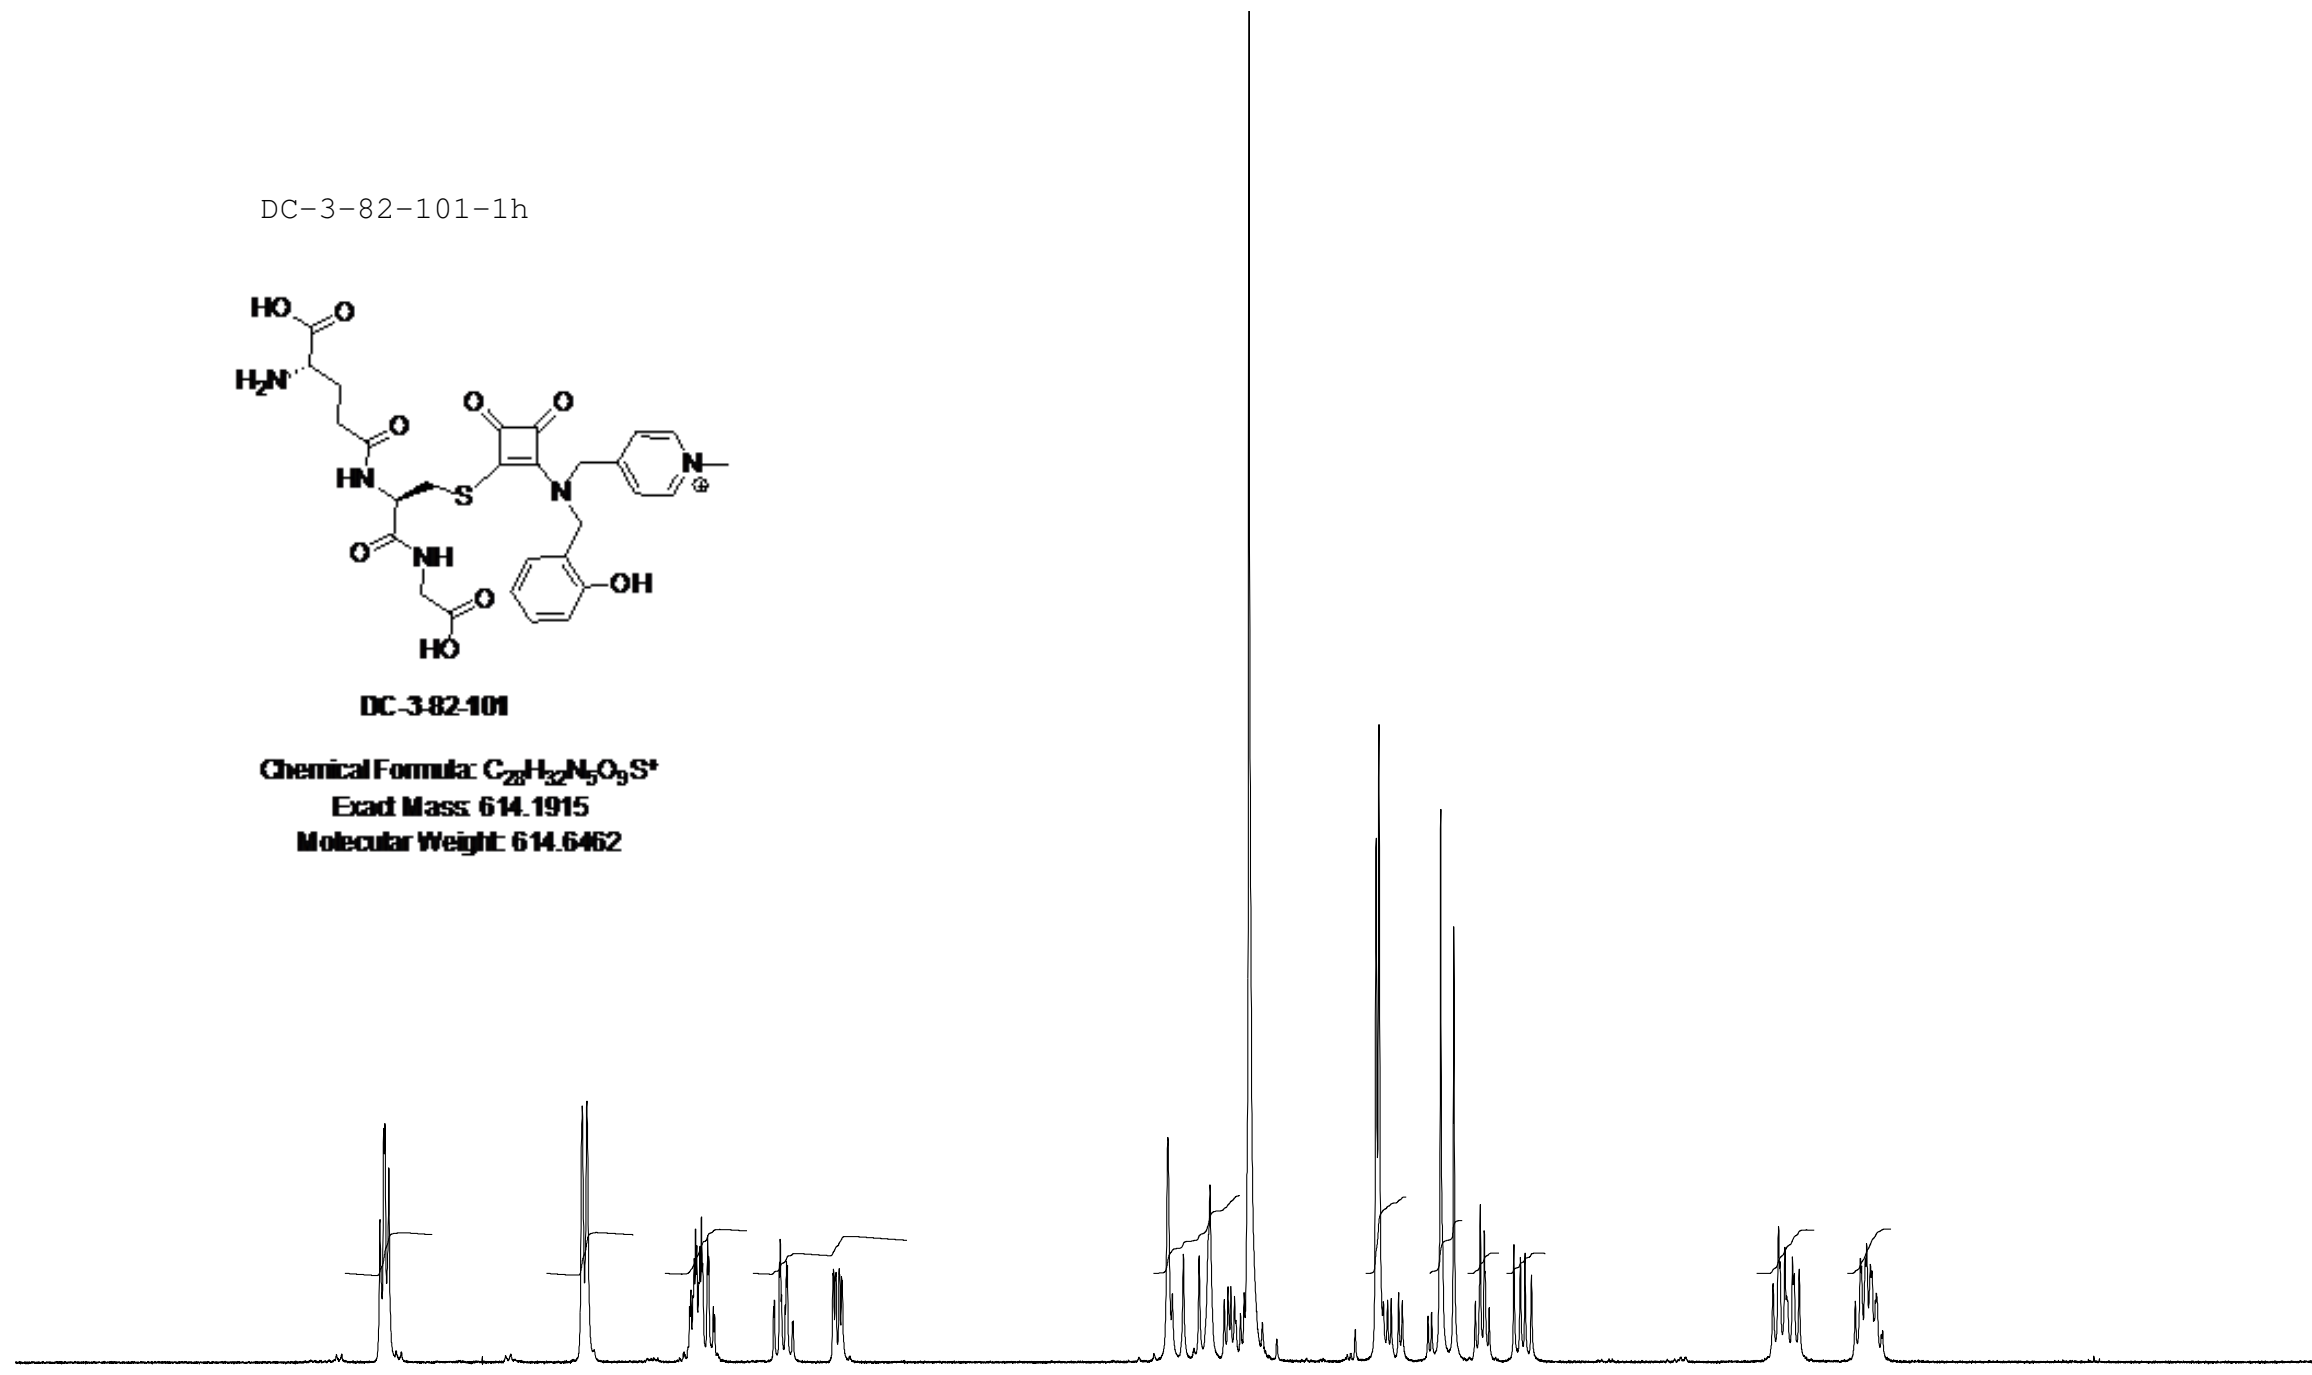

9.5 9.0 8.5 8.0 7.5 7.0 6.5 6.0 5.5 5.0 4.5 4.0 3.5 3.0 2.5 2.0 1.5 1.0 0.5 ppm

1.927  
 1.925  
 2.115  
 1.647  
 3.901  
 3.815  
 2.640  
 1.006  
 0.993  
 2.160  
 2.206

# Elemental Composition Report

Tolerance = 20.0 PPM / DBE: min = -1.5, max = 80.0

Selected filters: None

Monoisotopic Mass, Even Electron Ions

114 formula(e) evaluated with 1 results within limits (all results (up to 1000) for each mass)

Elements Used:

C: 0-28 H: 0-32 N: 0-5 O: 0-9 S: 0-1

File name: dc-3-82-101

Instrument: LCT KC366

Method: ESI-TOF

dc-3-82-101 57 (1.436) AM (Cen,8, 90.00, Ar,4000.0,1222.14,0.70,LS 6); Sm (SG, 2x4.00); Cm (57:60)

Notebook Ref: 24823

Test name: Accurate Mass

Base Peak Mass: 614.19097900

IU Database#: 24823

06-May-2010 11:43:09

1: TOF MS ES+  
1.67e4

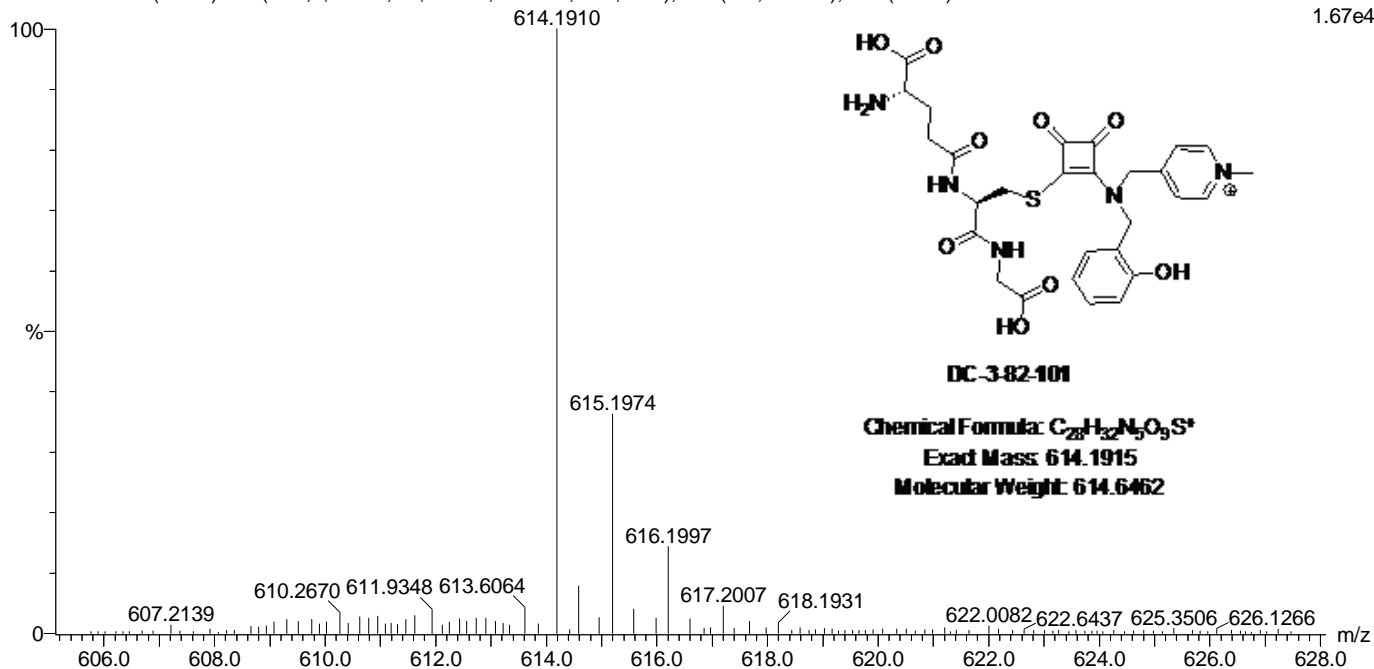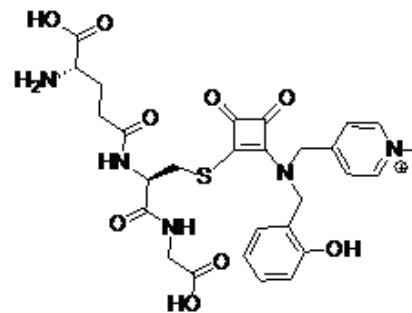

**DC-3-82-101**

**Chemical Formula: C<sub>28</sub>H<sub>32</sub>N<sub>5</sub>O<sub>9</sub>S<sup>+</sup>**

**Exact Mass: 614.1915**

**Molecular Weight: 614.6462**

| Mass     | RA     | Calc. Mass | mDa  | PPM  | DBE  | i-FIT | Formula                                                         |
|----------|--------|------------|------|------|------|-------|-----------------------------------------------------------------|
| 614.1910 | 100.00 | 614.1921   | -1.1 | -1.8 | 15.5 | 30.9  | C <sub>28</sub> H <sub>32</sub> N <sub>5</sub> O <sub>9</sub> S |

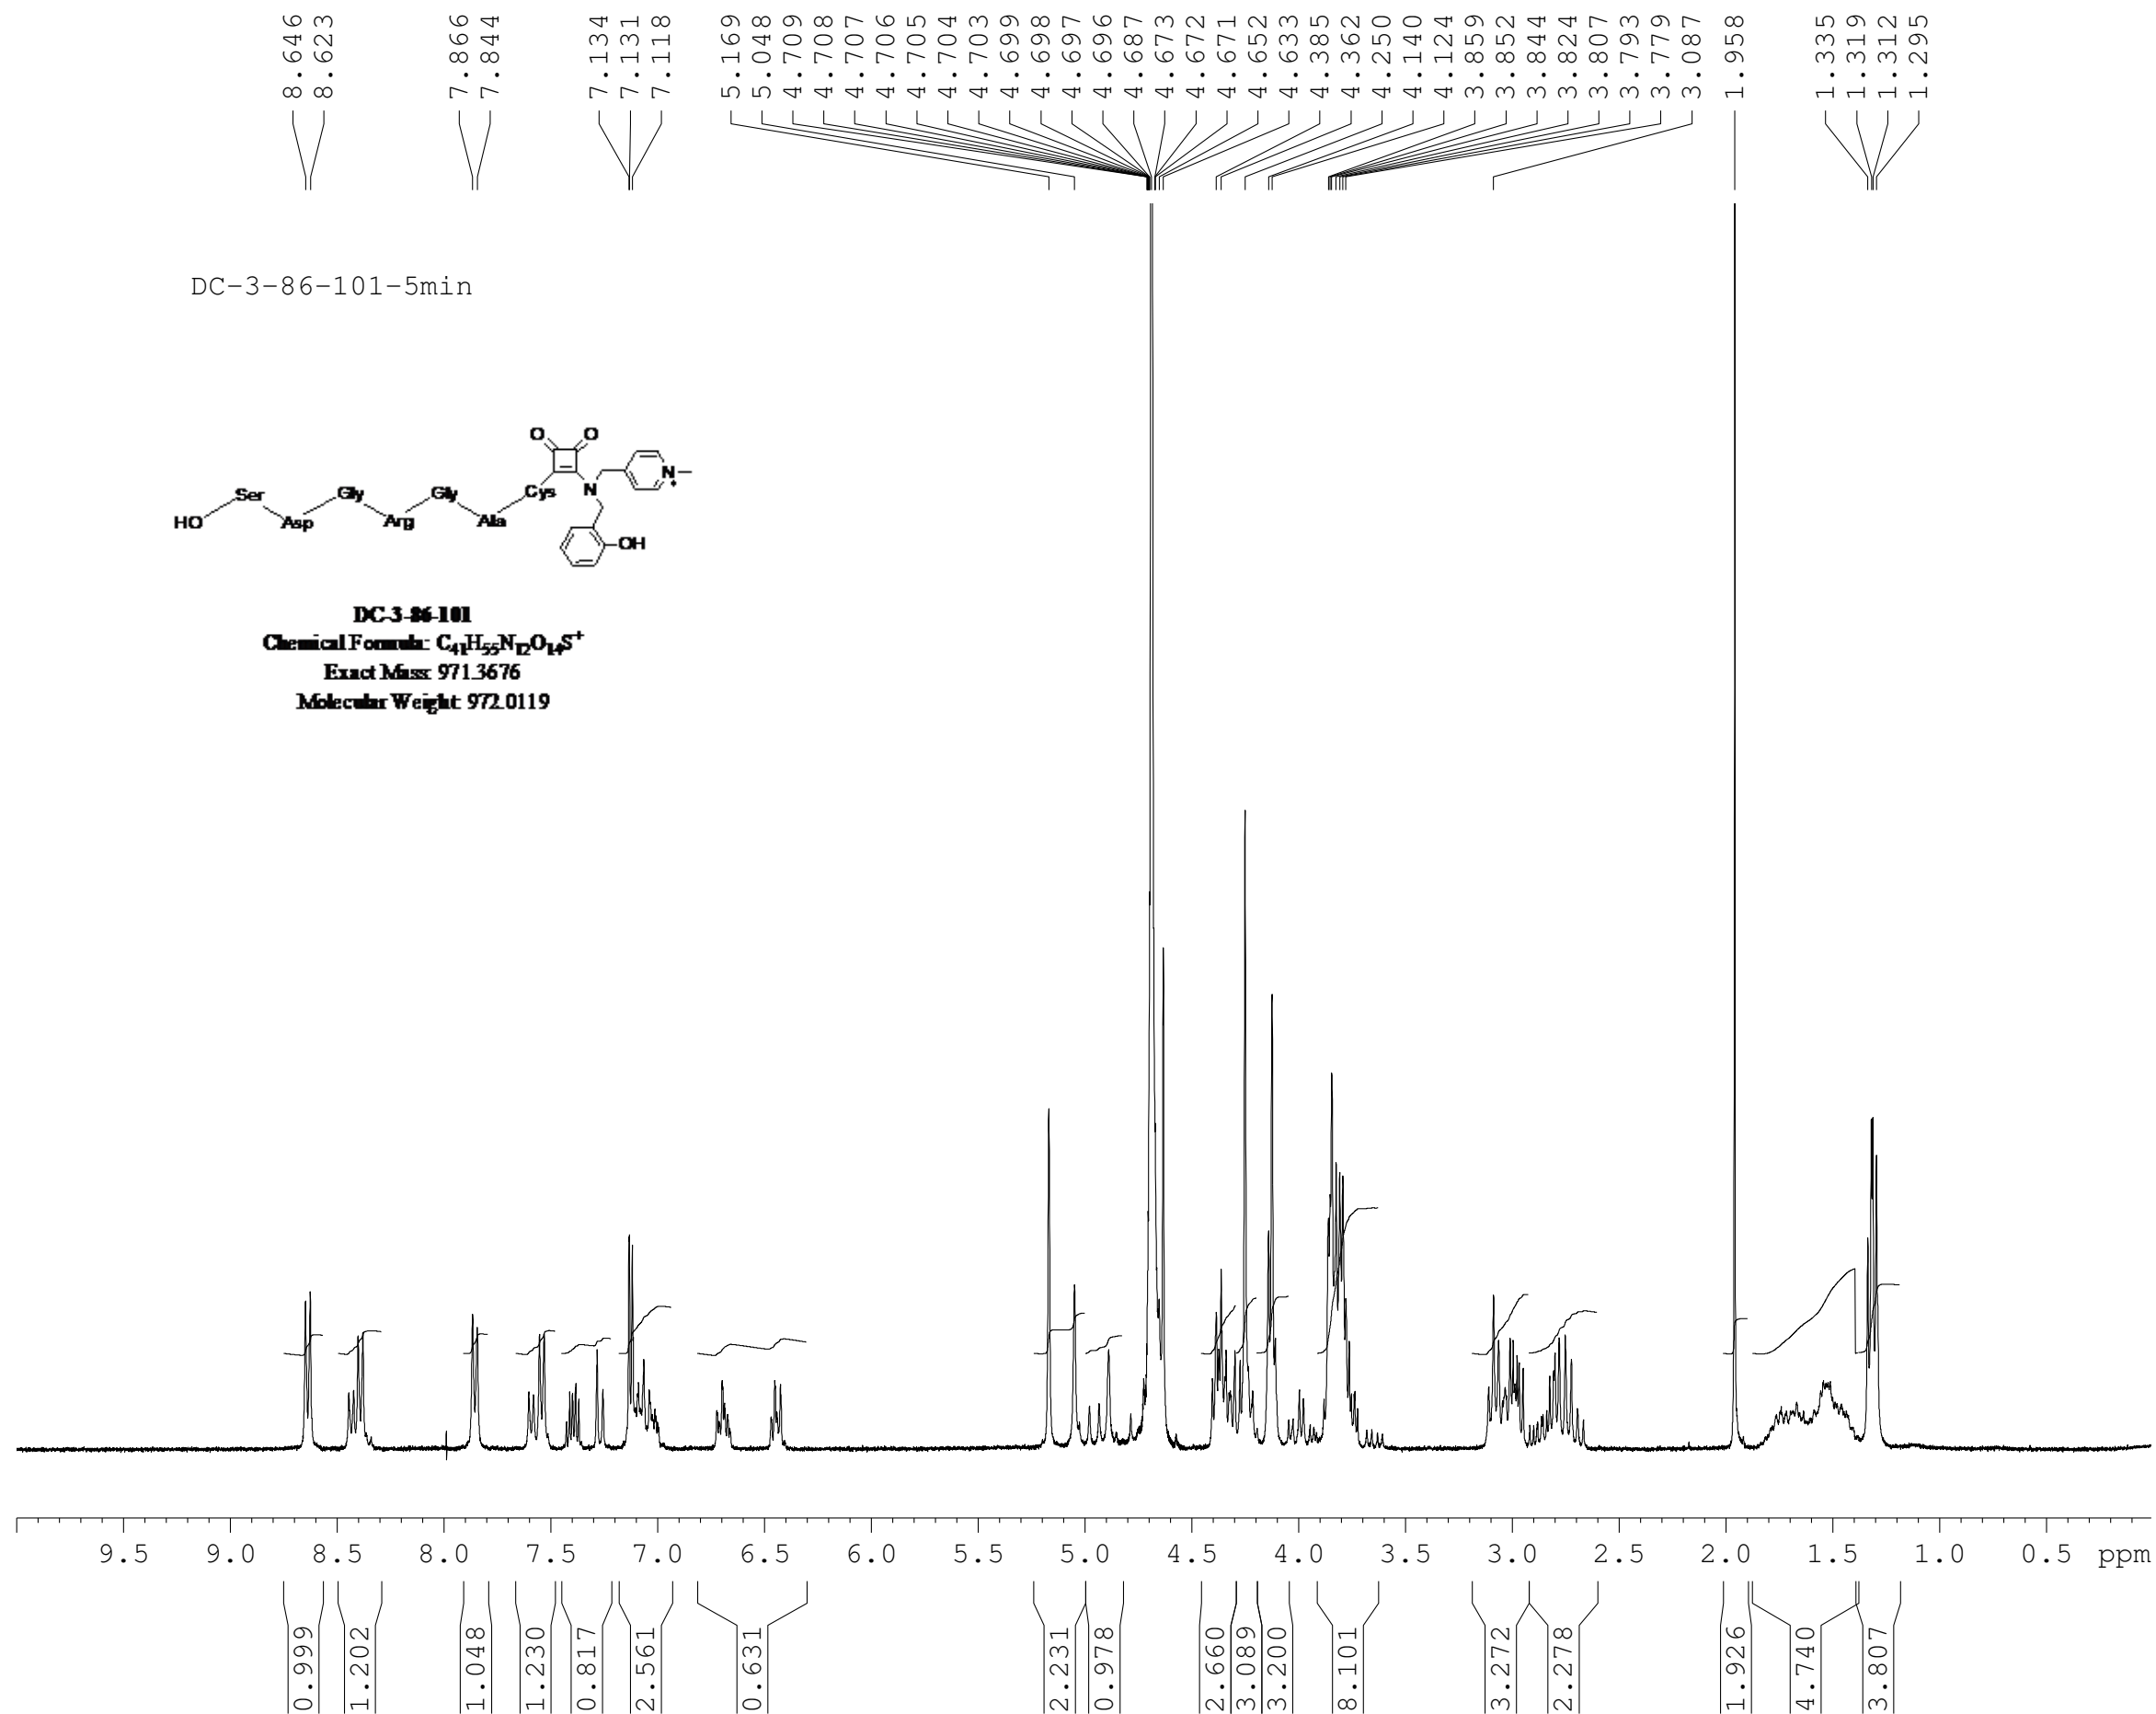

Current Data Parameters  
NAME DC-3-86-101-5min  
EXPNO 1  
PROCNO 1

F2 - Acquisition Parameters  
Date\_ 20100505  
Time 15.45  
INSTRUM spect  
PROBHD 5 mm QNP 1H/1  
PULPROG zg  
TD 32768  
SOLVENT D2O  
NS 64  
DS 0  
SWH 4789.272 Hz  
FIDRES 0.146157 Hz  
AQ 3.4210291 sec  
RG 512  
DW 104.400 usec  
DE 54.00 usec  
TE 683.2 K  
D1 1.00000000 sec  
TD0 1

==== CHANNEL f1 =====  
NUC1 1H  
P1 9.75 usec  
PL1 0.00 dB  
SFO1 300.1324000 MHz

F2 - Processing parameters  
SI 32768  
SF 300.1300024 MHz  
WDW no  
SSB 0  
LB 0.00 Hz  
GB 0  
PC 1.00

DC-3-86-101-1h

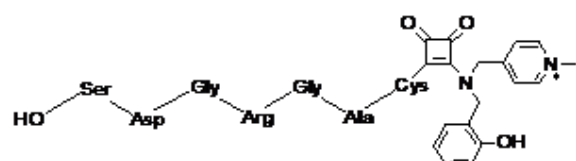

**DC-3-86-101**  
**Chemical Formula: C<sub>41</sub>H<sub>55</sub>N<sub>12</sub>O<sub>14</sub>S<sup>+</sup>**  
**Exact Mass: 971.3676**  
**Molecular Weight: 972.0119**

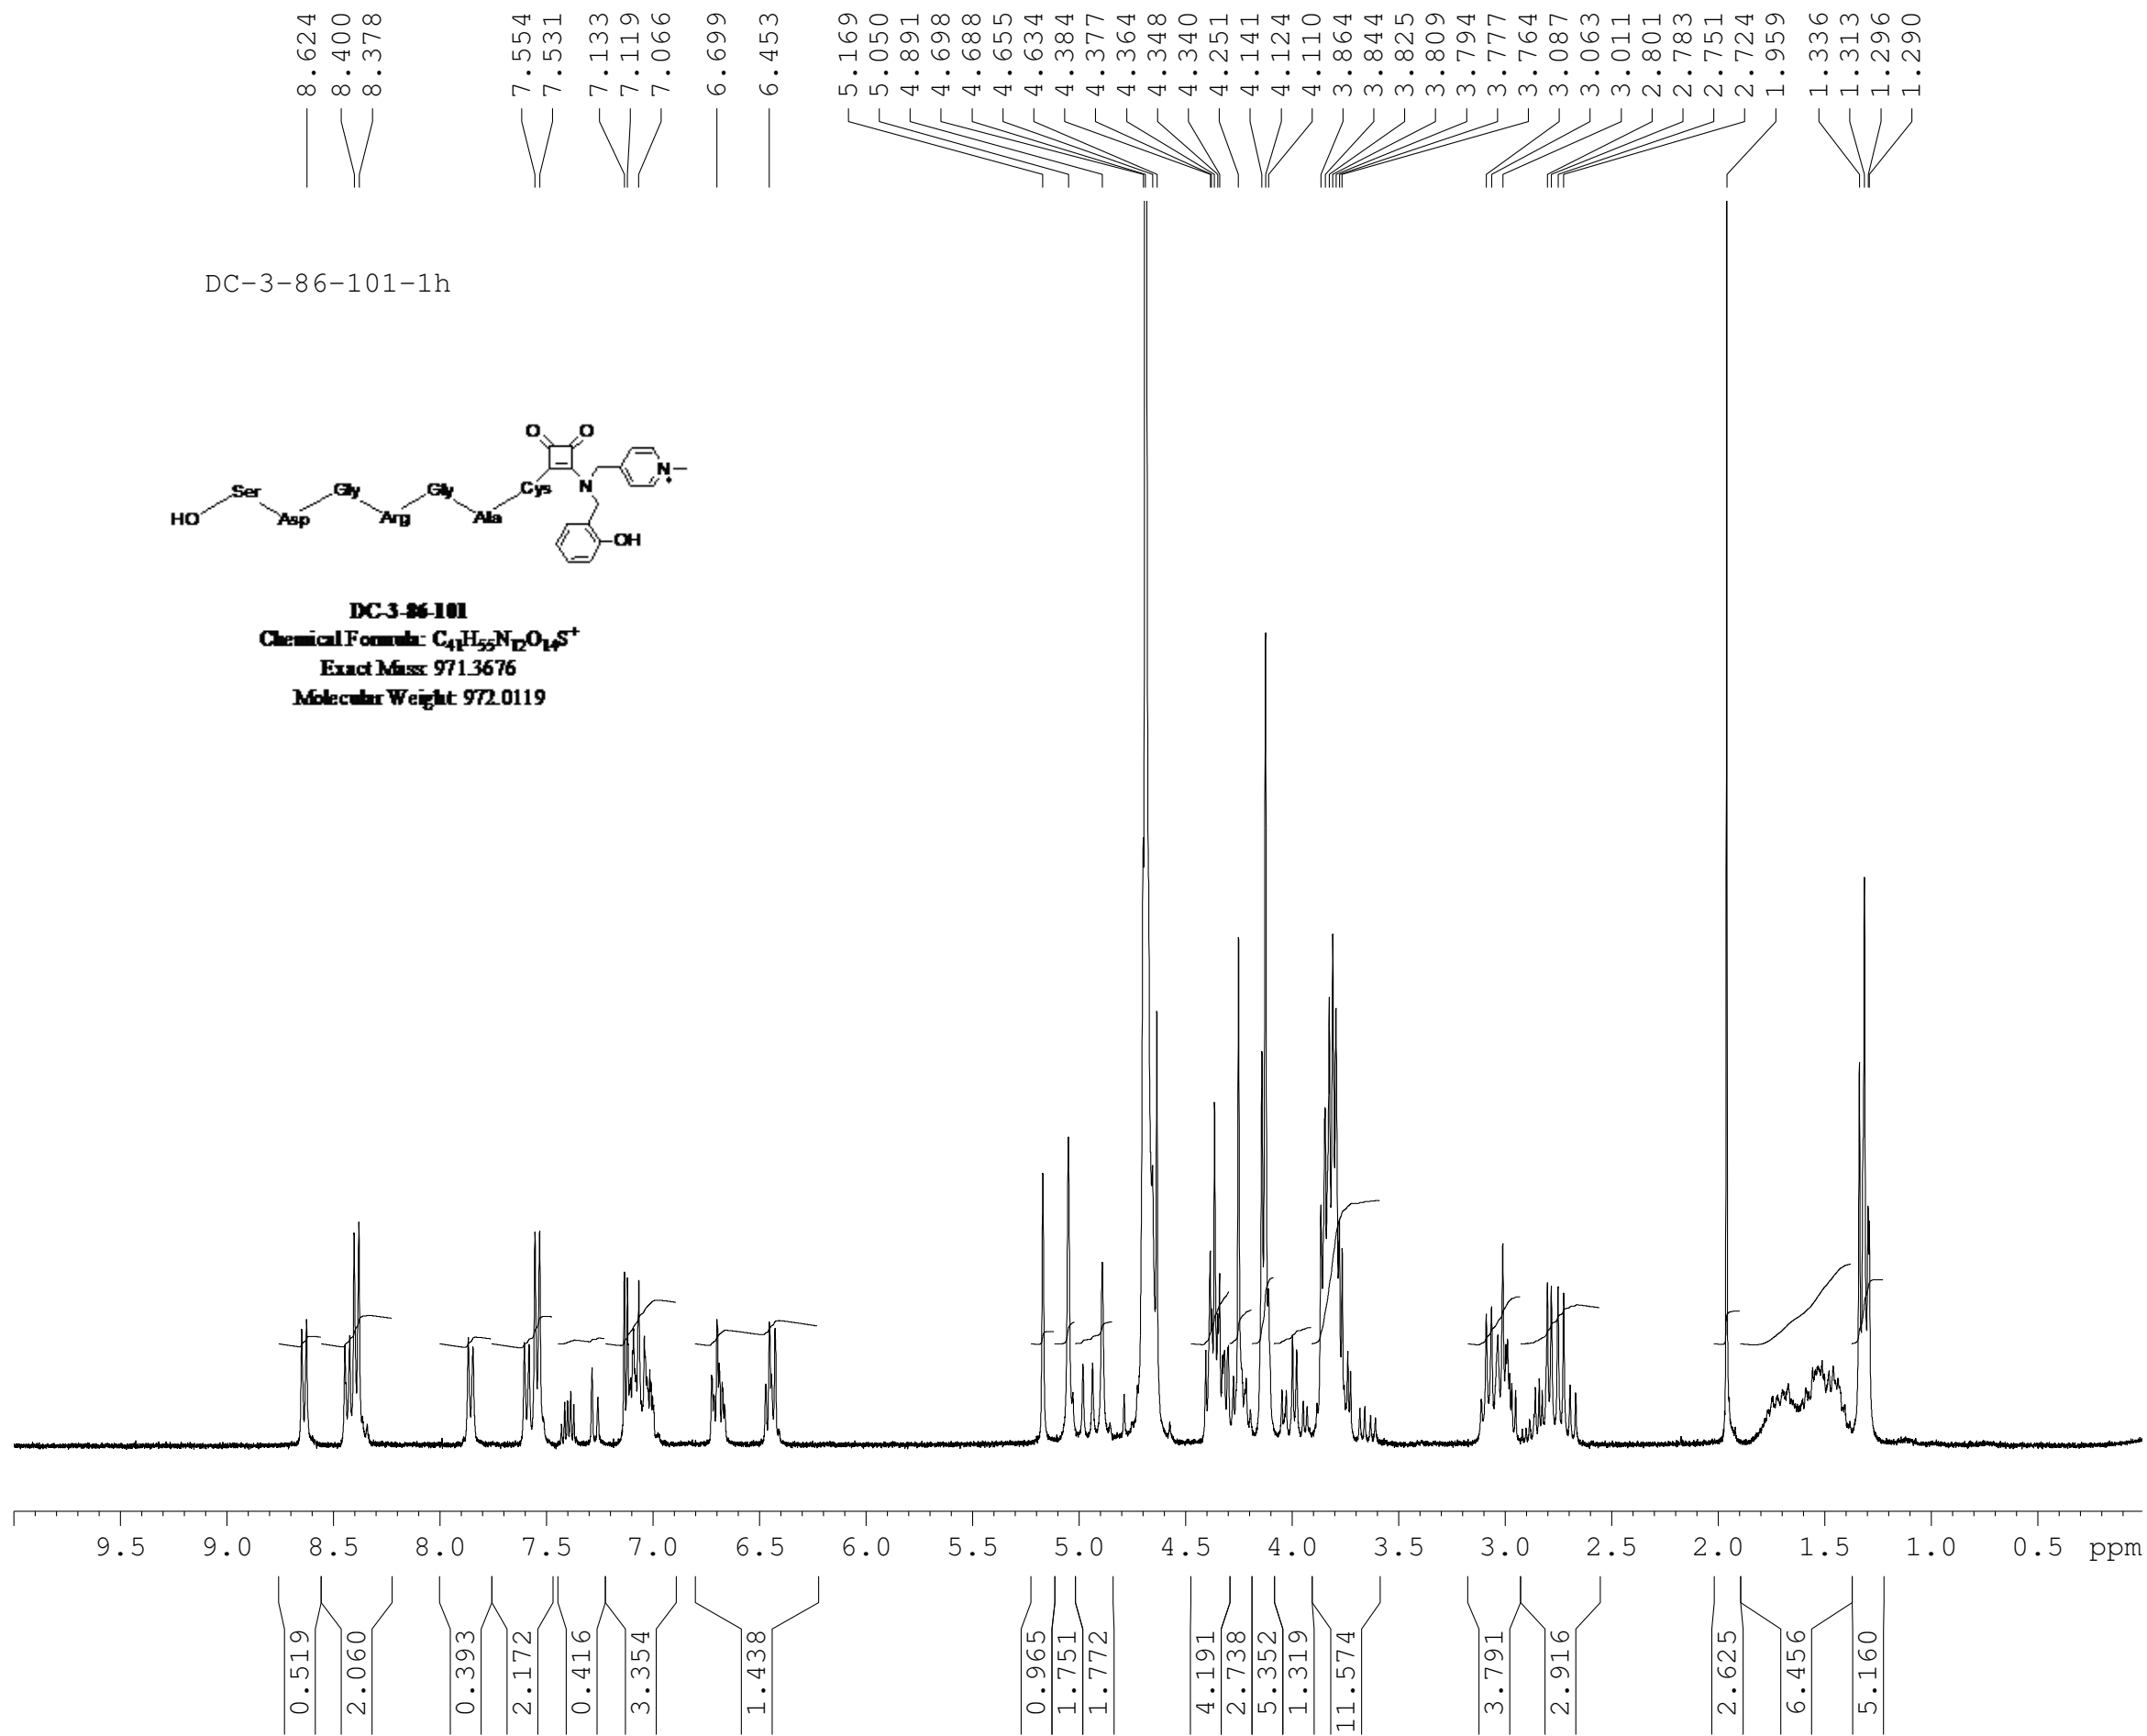

Current Data Parameters

NAME DC-3-86-101-1h  
 EXPNO 1  
 PROCNO 1

F2 - Acquisition Parameters

Date\_ 20100505  
 Time 16.33  
 INSTRUM spect  
 PROBHD 5 mm QNP 1H/1  
 PULPROG zg  
 TD 32768  
 SOLVENT D2O  
 NS 64  
 DS 0  
 SWH 4789.272 Hz  
 FIDRES 0.146157 Hz  
 AQ 3.4210291 sec  
 RG 512  
 DW 104.400 usec  
 DE 54.00 usec  
 TE 683.2 K  
 D1 1.00000000 sec  
 TD0 1

==== CHANNEL f1 =====

NUC1 1H  
 P1 9.75 usec  
 PL1 0.00 dB  
 SFO1 300.1324000 MHz

F2 - Processing parameters

SI 32768  
 SF 300.1300024 MHz  
 WDW no  
 SSB 0  
 LB 0.00 Hz  
 GB 0  
 PC 1.00

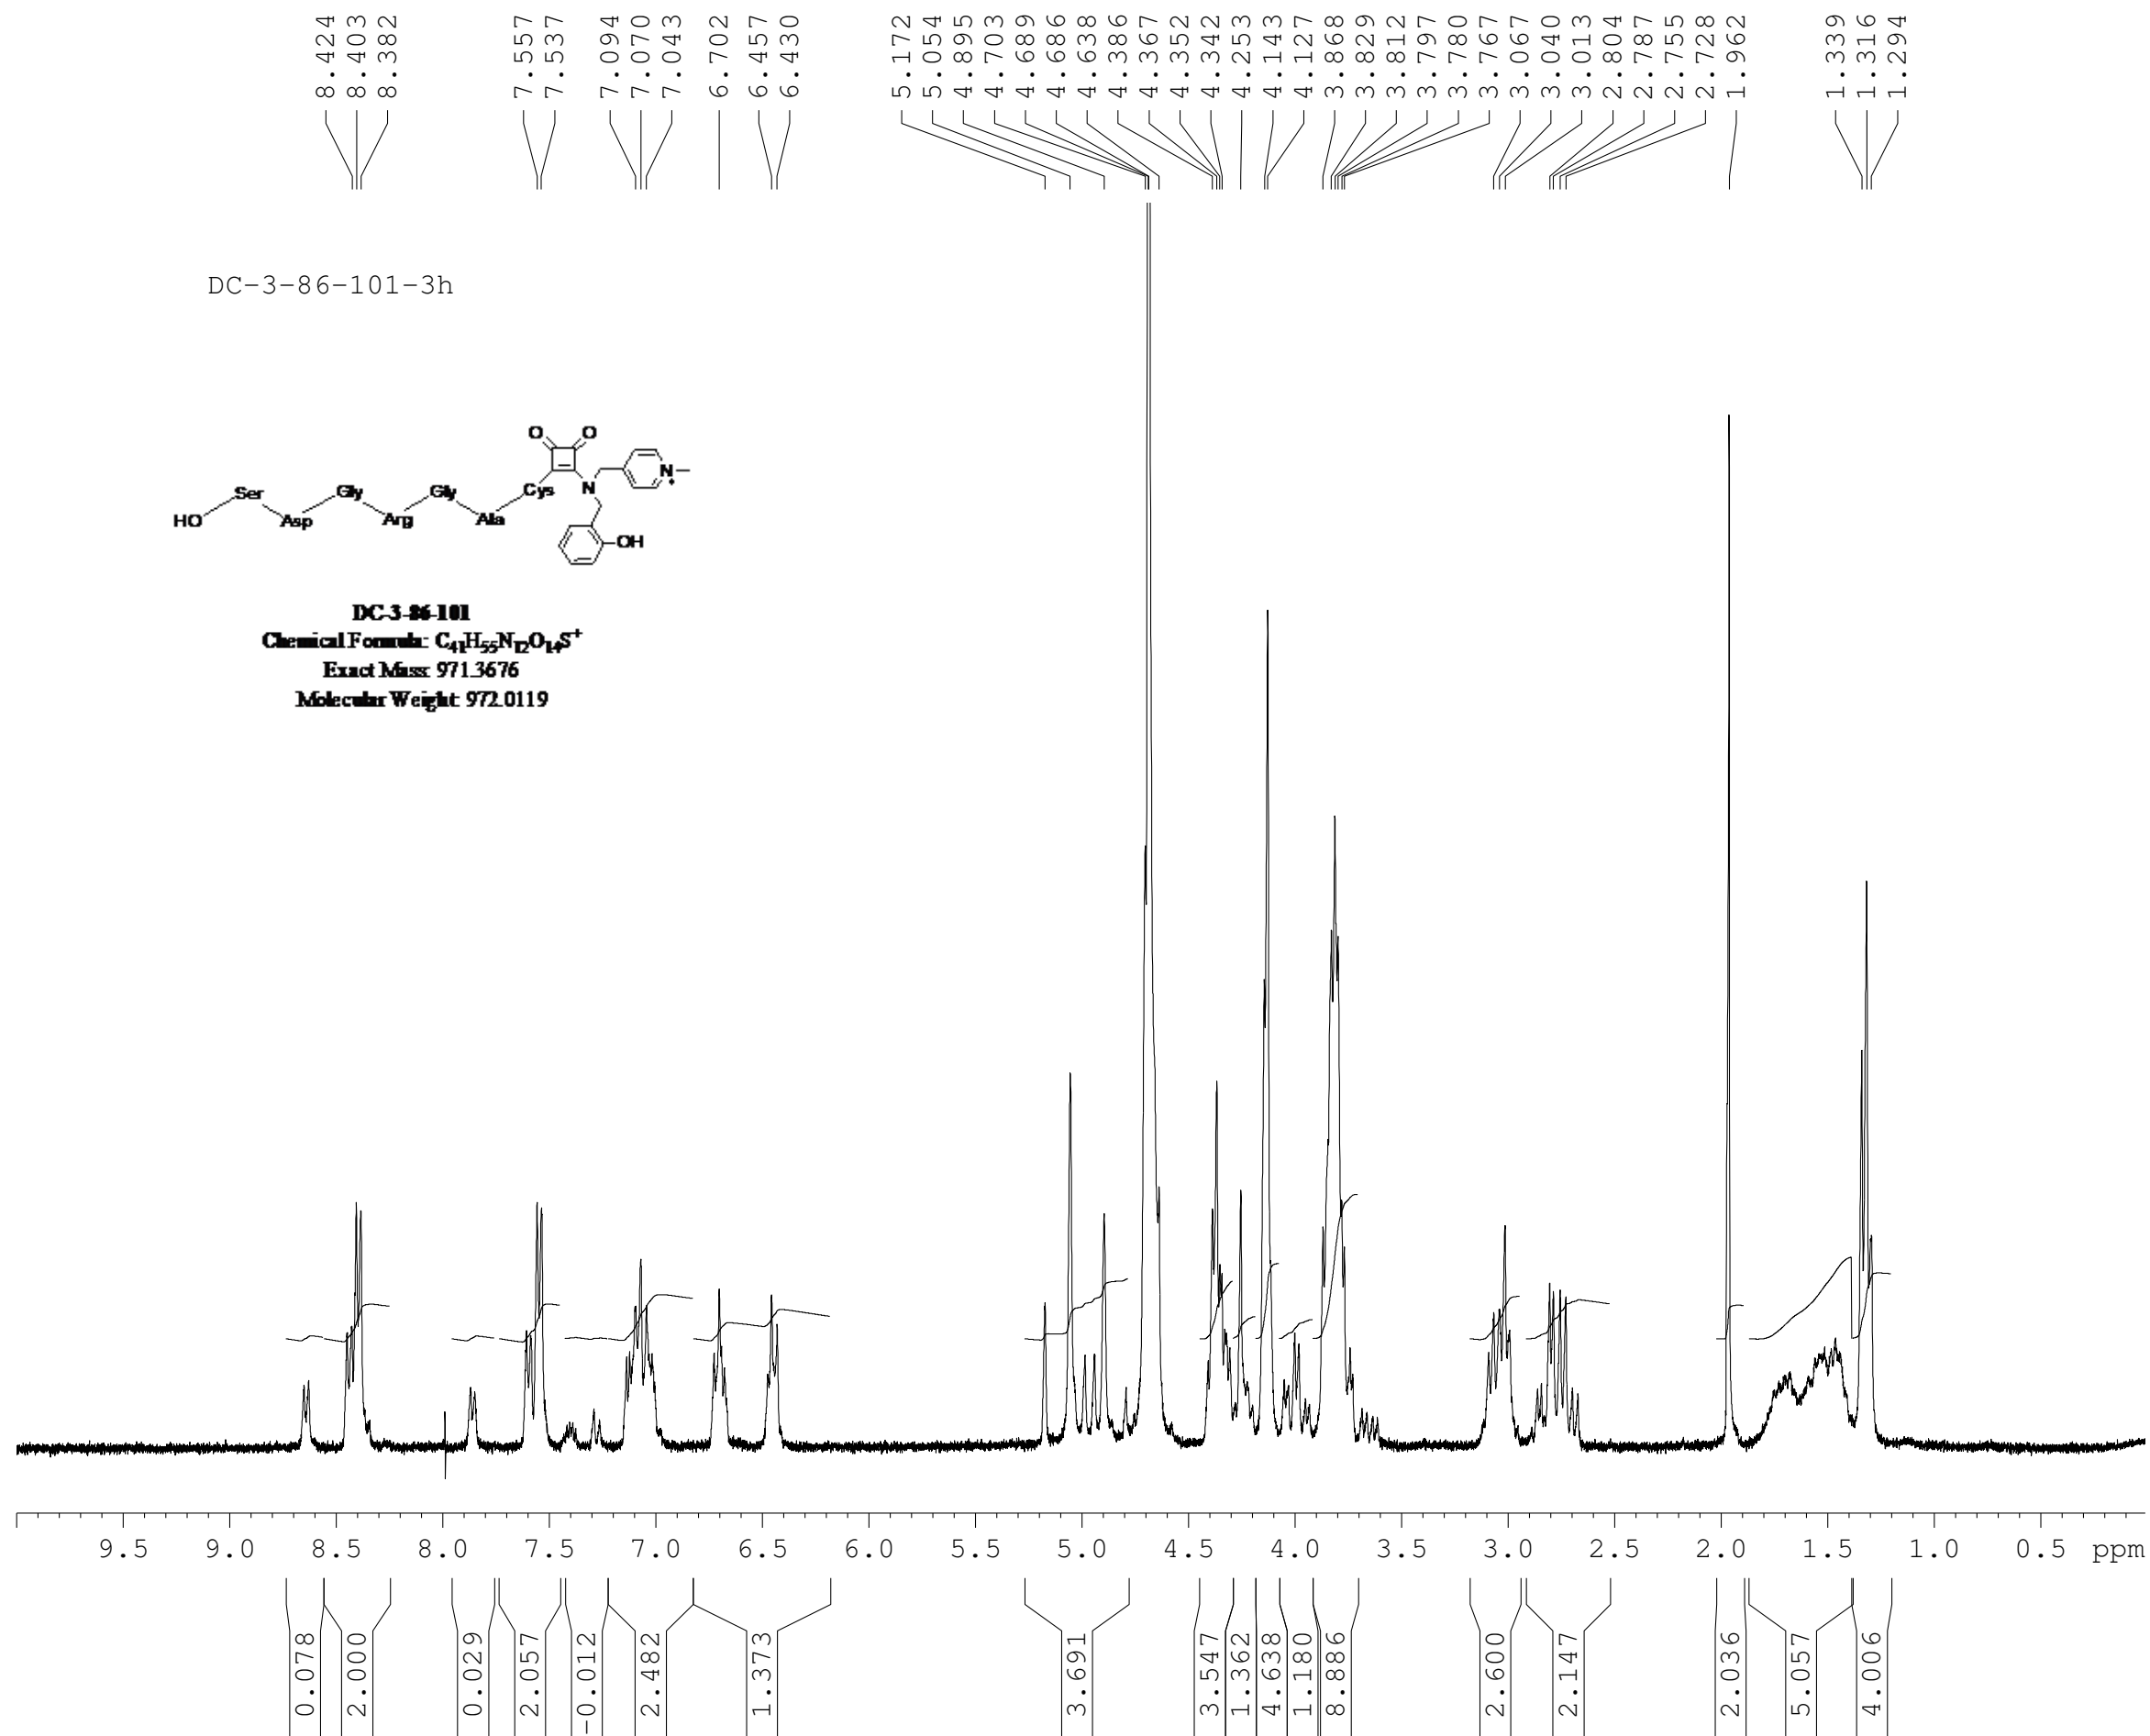

Current Data Parameters

NAME DC-3-86-101-3h  
EXPNO 1  
PROCNO 1

F2 - Acquisition Parameters

Date\_ 20100505  
Time 18.32  
INSTRUM spect  
PROBHD 5 mm QNP 1H/1  
PULPROG zg  
TD 32768  
SOLVENT D2O  
NS 32  
DS 0  
SWH 4789.272 Hz  
FIDRES 0.146157 Hz  
AQ 3.4210291 sec  
RG 512  
DW 104.400 usec  
DE 54.00 usec  
TE 683.2 K  
D1 1.00000000 sec  
TD0 1

==== CHANNEL f1 =====

NUC1 1H  
P1 9.75 usec  
PL1 0.00 dB  
SFO1 300.1324000 MHz

F2 - Processing parameters

SI 32768  
SF 300.1300024 MHz  
WDW no  
SSB 0  
LB 0.00 Hz  
GB 0  
PC 1.00

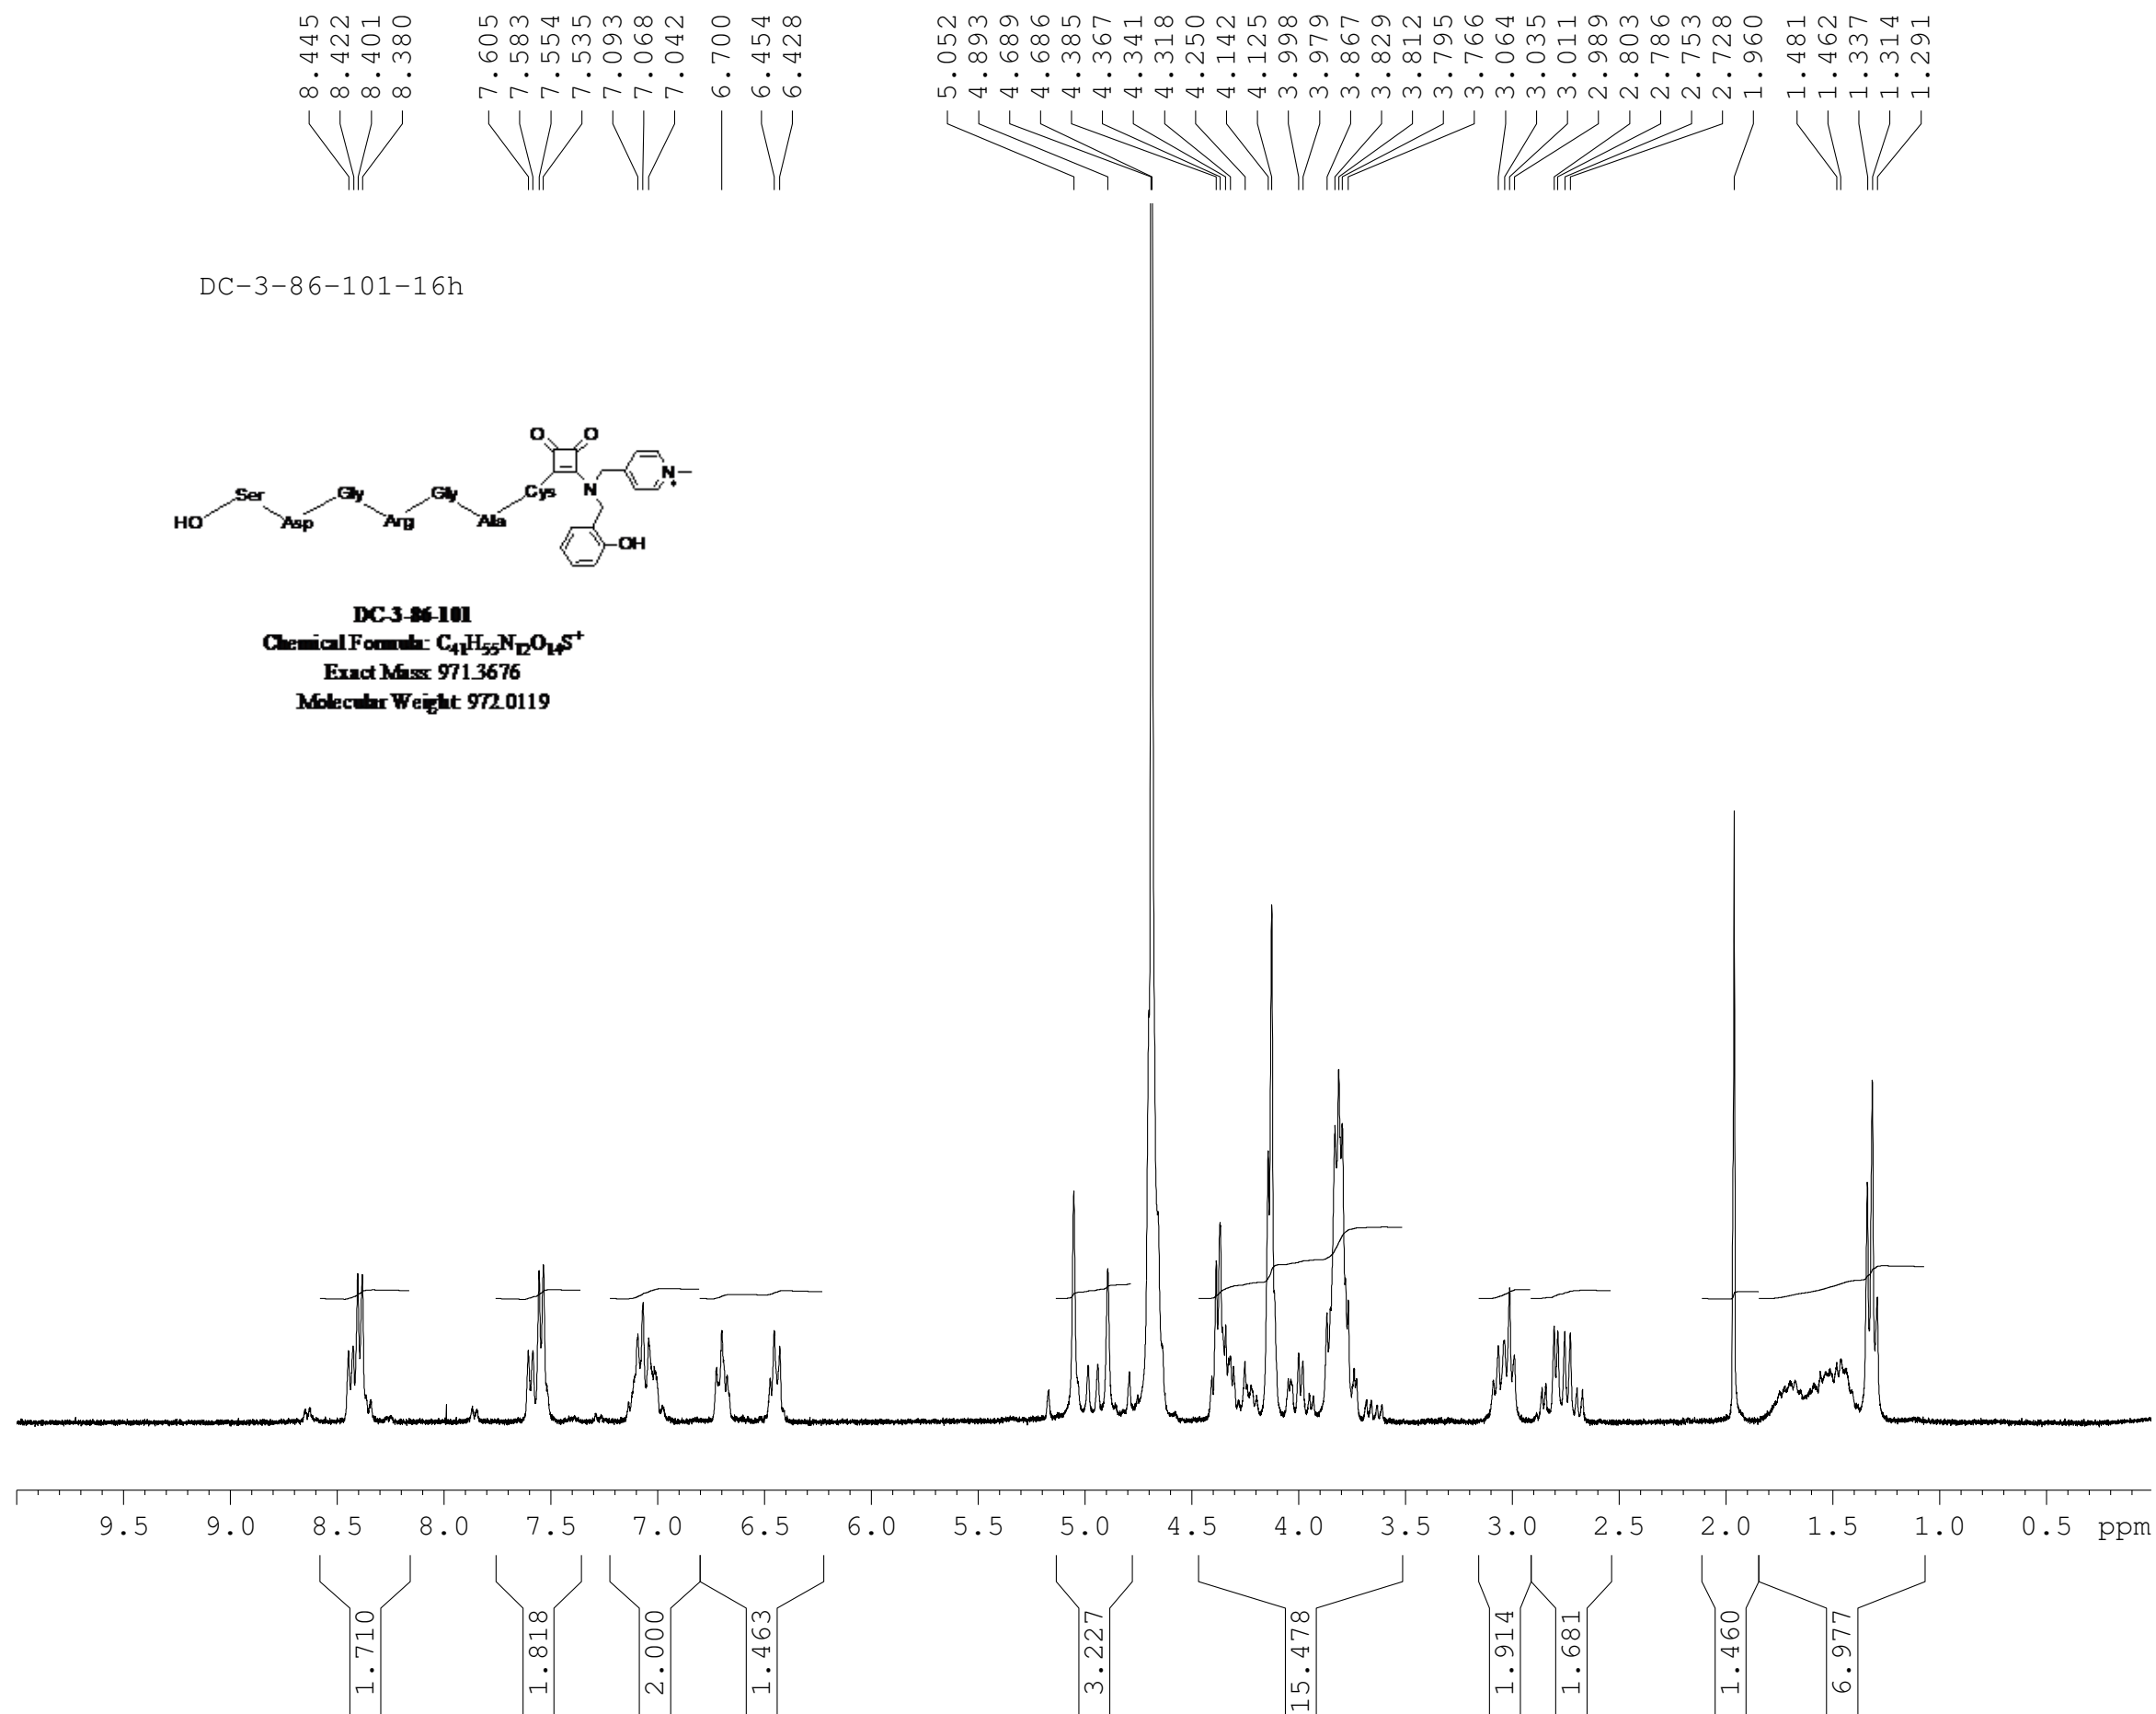

Current Data Parameters  
 NAME DC-3-86-101-16h  
 EXPNO 1  
 PROCNO 1

F2 - Acquisition Parameters  
 Date\_ 20100506  
 Time 9.39  
 INSTRUM spect  
 PROBHD 5 mm QNP 1H/1  
 PULPROG zg  
 TD 32768  
 SOLVENT D2O  
 NS 32  
 DS 0  
 SWH 4789.272 Hz  
 FIDRES 0.146157 Hz  
 AQ 3.4210291 sec  
 RG 512  
 DW 104.400 usec  
 DE 54.00 usec  
 TE 683.2 K  
 D1 1.00000000 sec  
 TD0 1

==== CHANNEL f1 =====  
 NUC1 1H  
 P1 9.75 usec  
 PL1 0.00 dB  
 SFO1 300.1324000 MHz

F2 - Processing parameters  
 SI 32768  
 SF 300.1300024 MHz  
 WDW no  
 SSB 0  
 LB 0.00 Hz  
 GB 0  
 PC 1.00

File name: dc-3-86-101  
Instrument: LCT KC366  
Method: ESI-TOF

Notebook Ref: 24947  
Test name: Accurate Mass  
Base Peak Mass: 486.18878174

IU Database#: 24947  
13-May-2010 12:23:17

dc-3-86-101 (0.035) Is (0.50,0.50) C<sub>41</sub>H<sub>54</sub>N<sub>12</sub>O<sub>14</sub>S

1: TOF MS ES+  
5.54e12

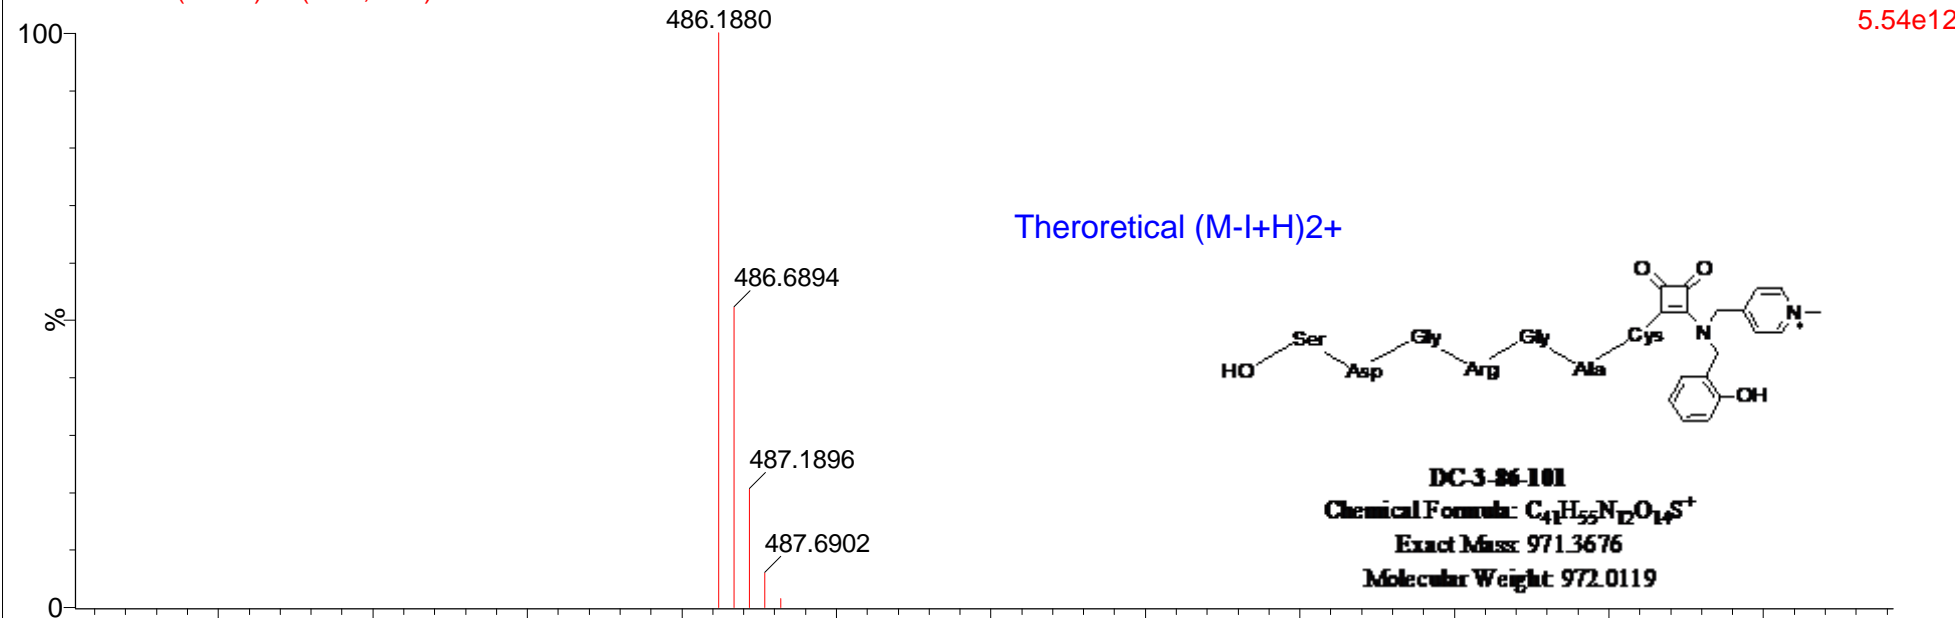

dc-3-86-101 48 (1.202) AM (Cen,8, 90.00, Ar,5000.0,1971.61,0.70,LS 6); Sm (SG, 2x4.00); Cm (48:54)

1: TOF MS ES+  
5.22e3

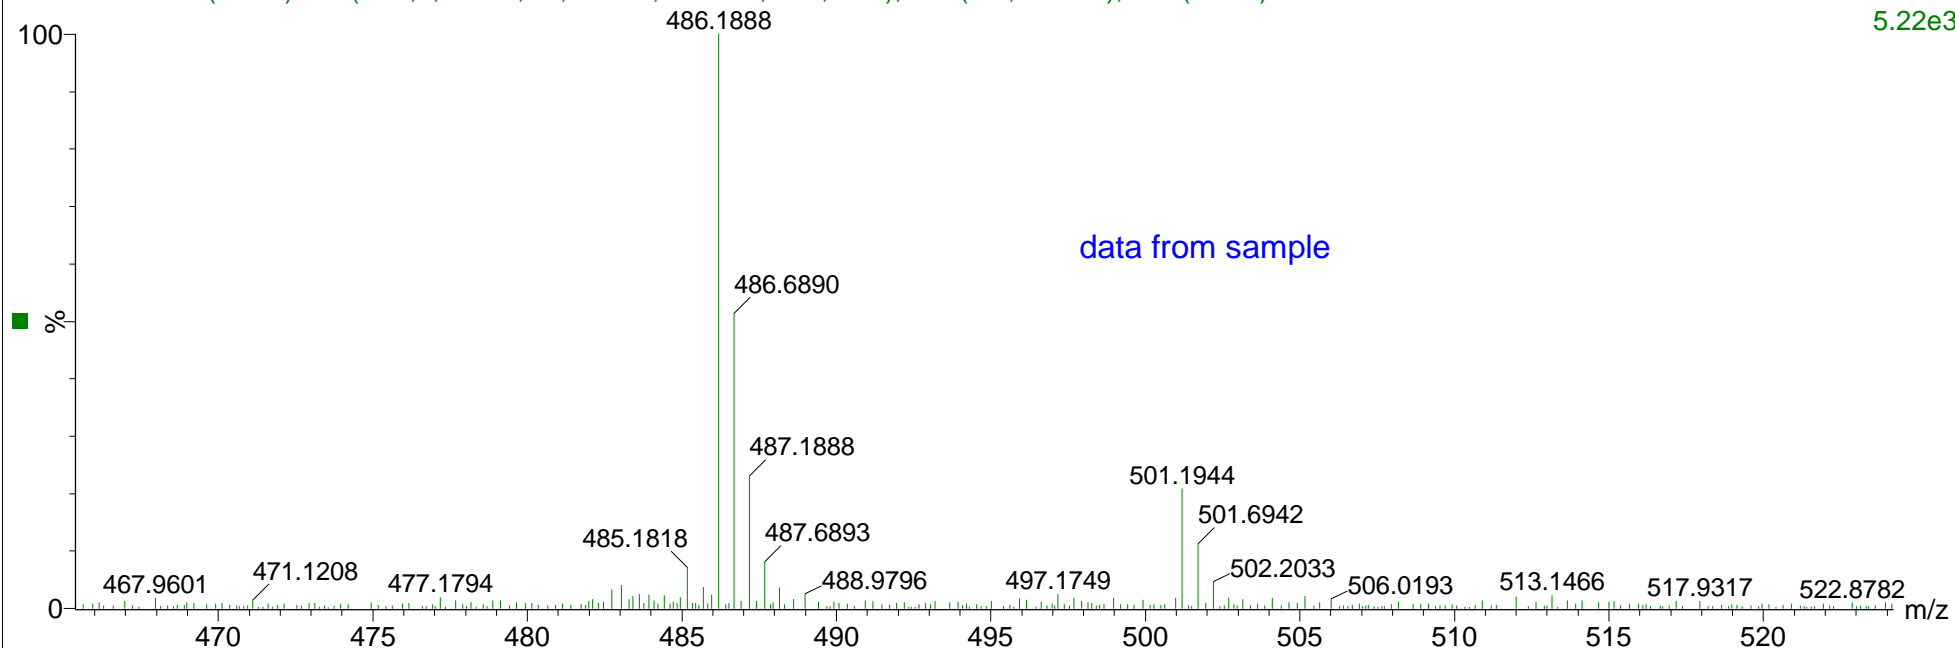

DC-2-92-201-5min

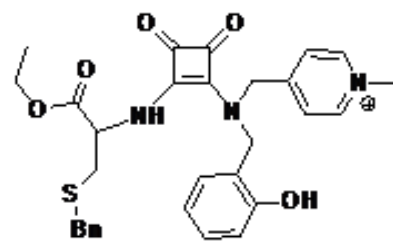

**DC-2-92-201**

**Chemical Formula: C<sub>30</sub>H<sub>32</sub>N<sub>3</sub>O<sub>5</sub><sup>+</sup>**

**Exact Mass: 546.2057**

**Molecular Weight: 546.6566**

8.682  
8.661  
7.900  
7.880  
7.457  
7.440  
7.428  
7.415  
7.399  
7.337  
7.323  
7.308  
7.280  
7.262  
7.171  
7.159

5.196  
4.682  
4.661  
4.287  
4.228  
4.205  
4.180  
4.157  
4.101  
4.085  
4.074  
4.059  
3.753  
3.052  
3.037  
3.002  
2.987  
2.924  
2.898  
2.874  
2.848

1.214  
1.190  
1.167

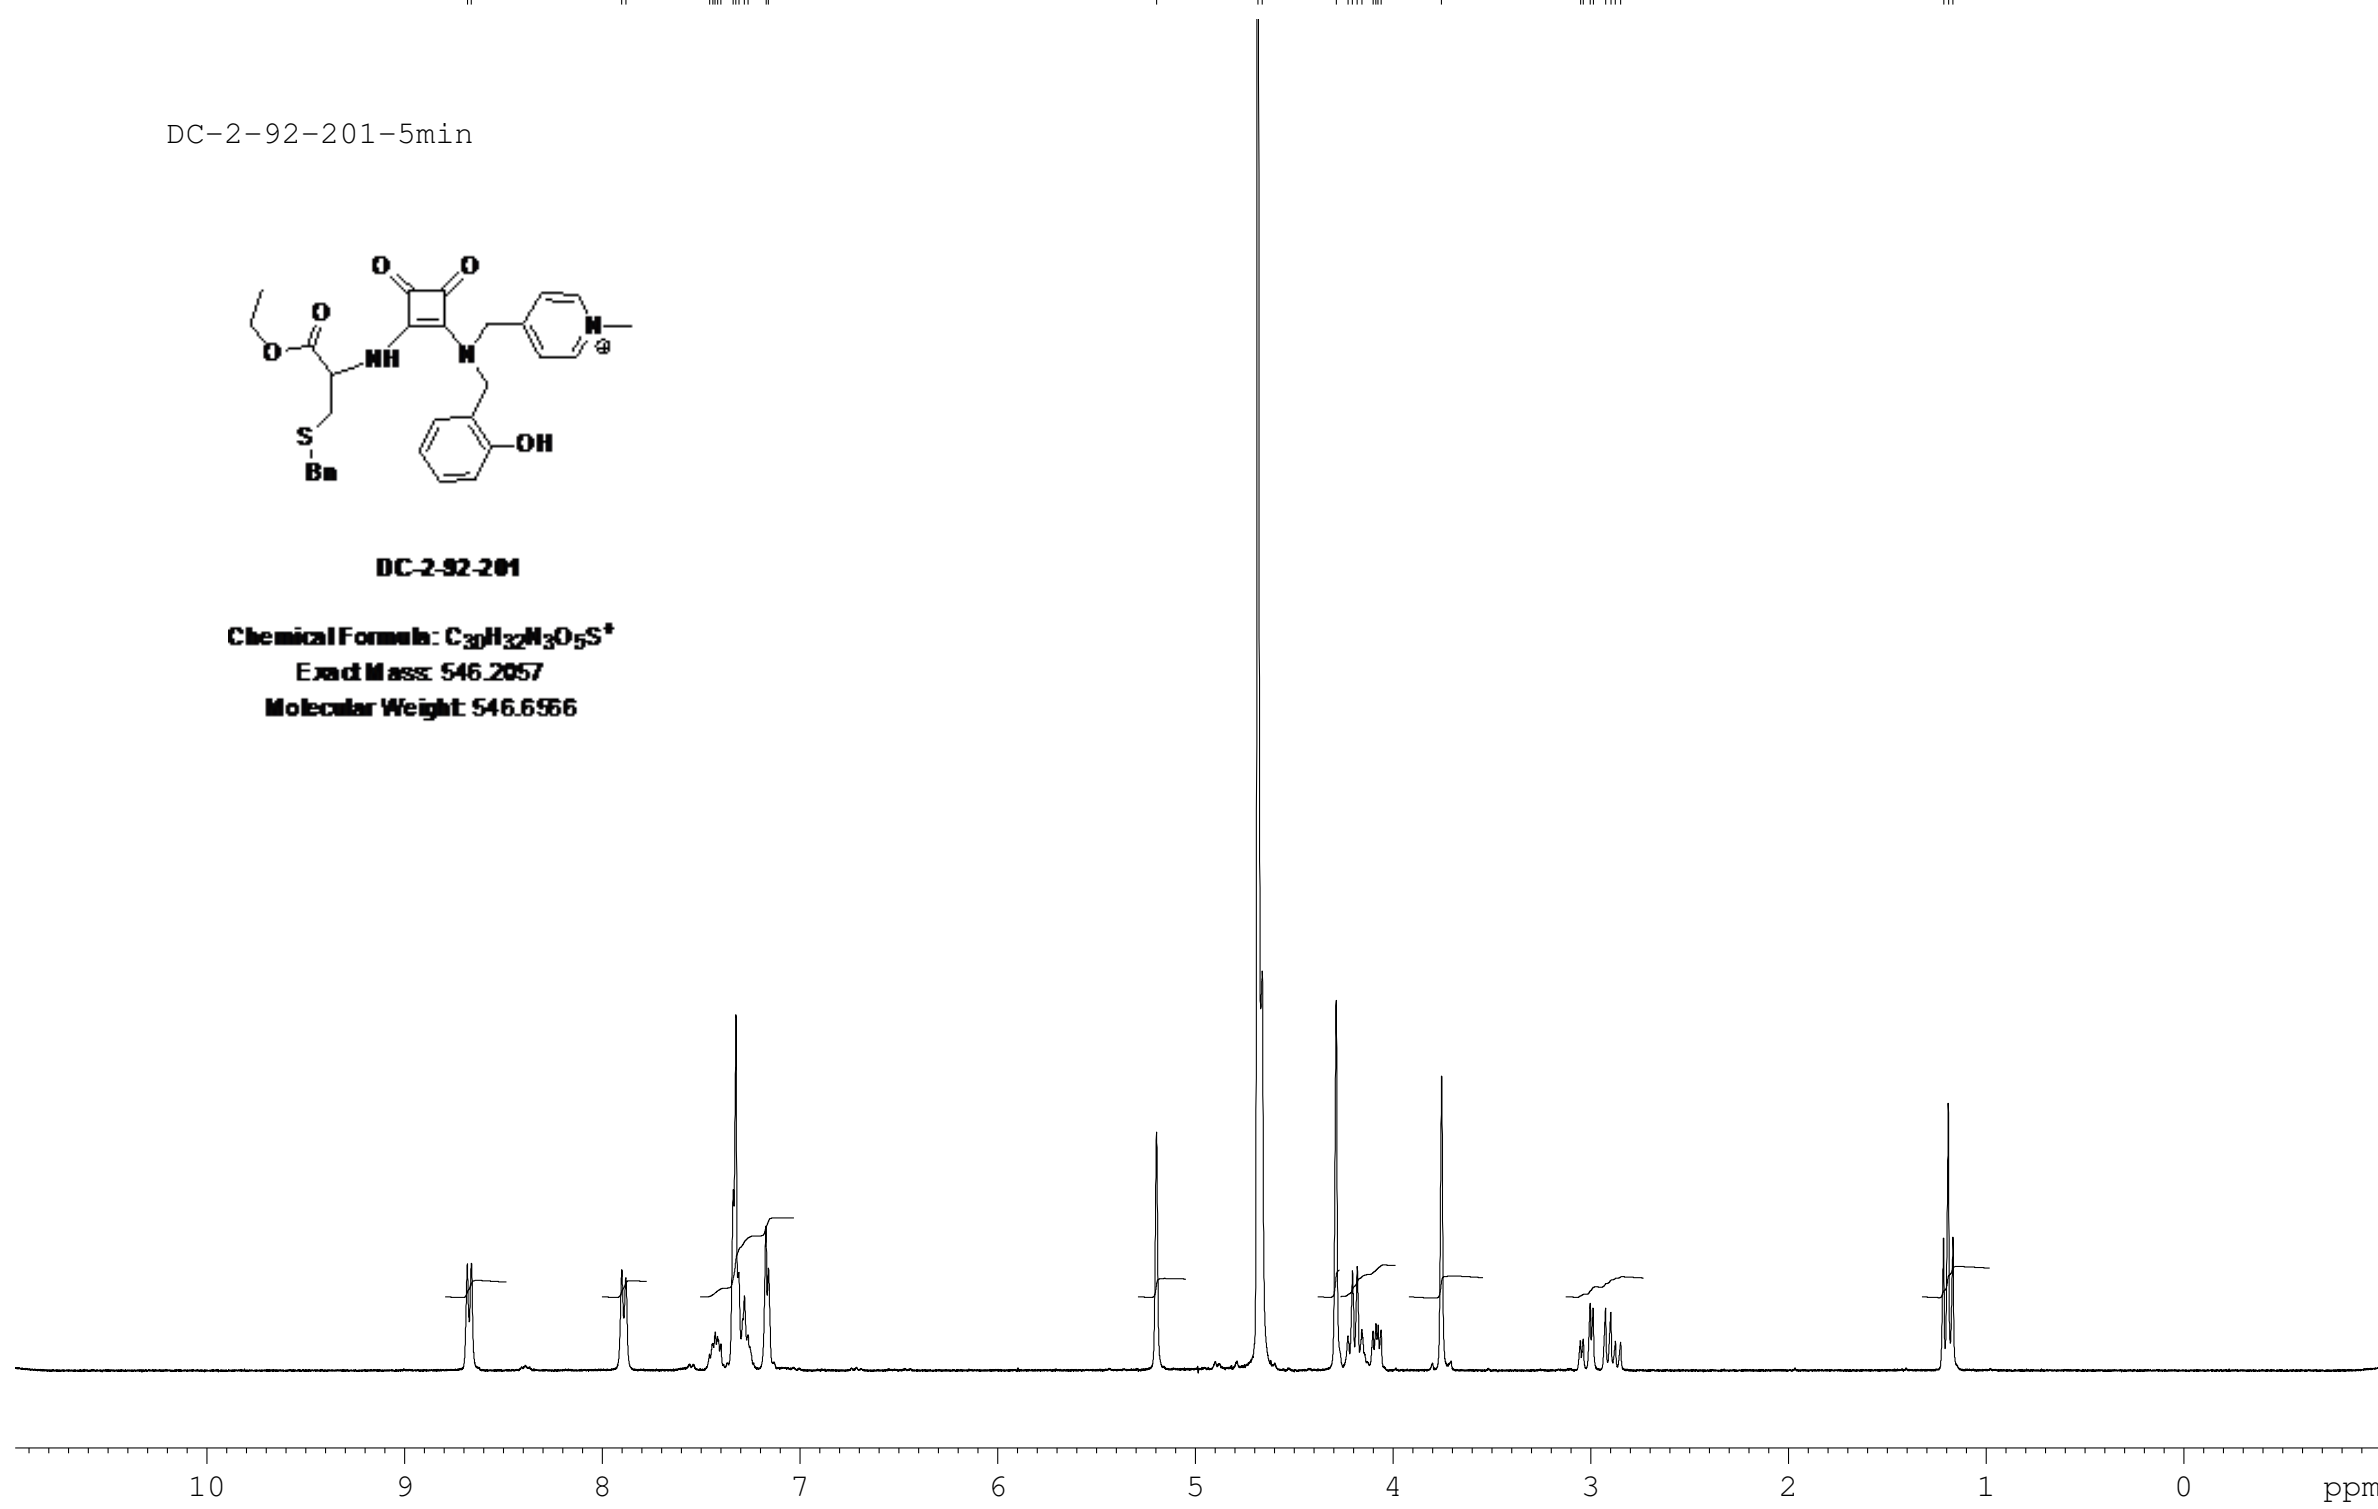

1.651  
1.731  
8.927  
2.000  
3.029  
3.523  
2.156  
2.119  
3.243

Current Data Parameters  
 NAME DC-2-92-201-5min  
 EXPNO 1  
 PROCNO 1

F2 - Acquisition Parameters  
 Date\_ 20100226  
 Time 14.42  
 INSTRUM spect  
 PROBHD 5 mm QNP 1H/1  
 PULPROG zg  
 TD 32768  
 SOLVENT D2O  
 NS 32  
 DS 0  
 SWH 3591.954 Hz  
 FIDRES 0.109618 Hz  
 AQ 4.5613556 sec  
 RG 256  
 DW 139.200 usec  
 DE 54.00 usec  
 TE 299.2 K  
 D1 1.00000000 sec  
 TD0 1

==== CHANNEL f1 =====  
 NUC1 1H  
 P1 9.75 usec  
 PL1 0.00 dB  
 SFO1 300.1315007 MHz

F2 - Processing parameters  
 SI 32768  
 SF 300.1300042 MHz  
 WDW no  
 SSB 0  
 LB 0.00 Hz  
 GB 0  
 PC 1.00



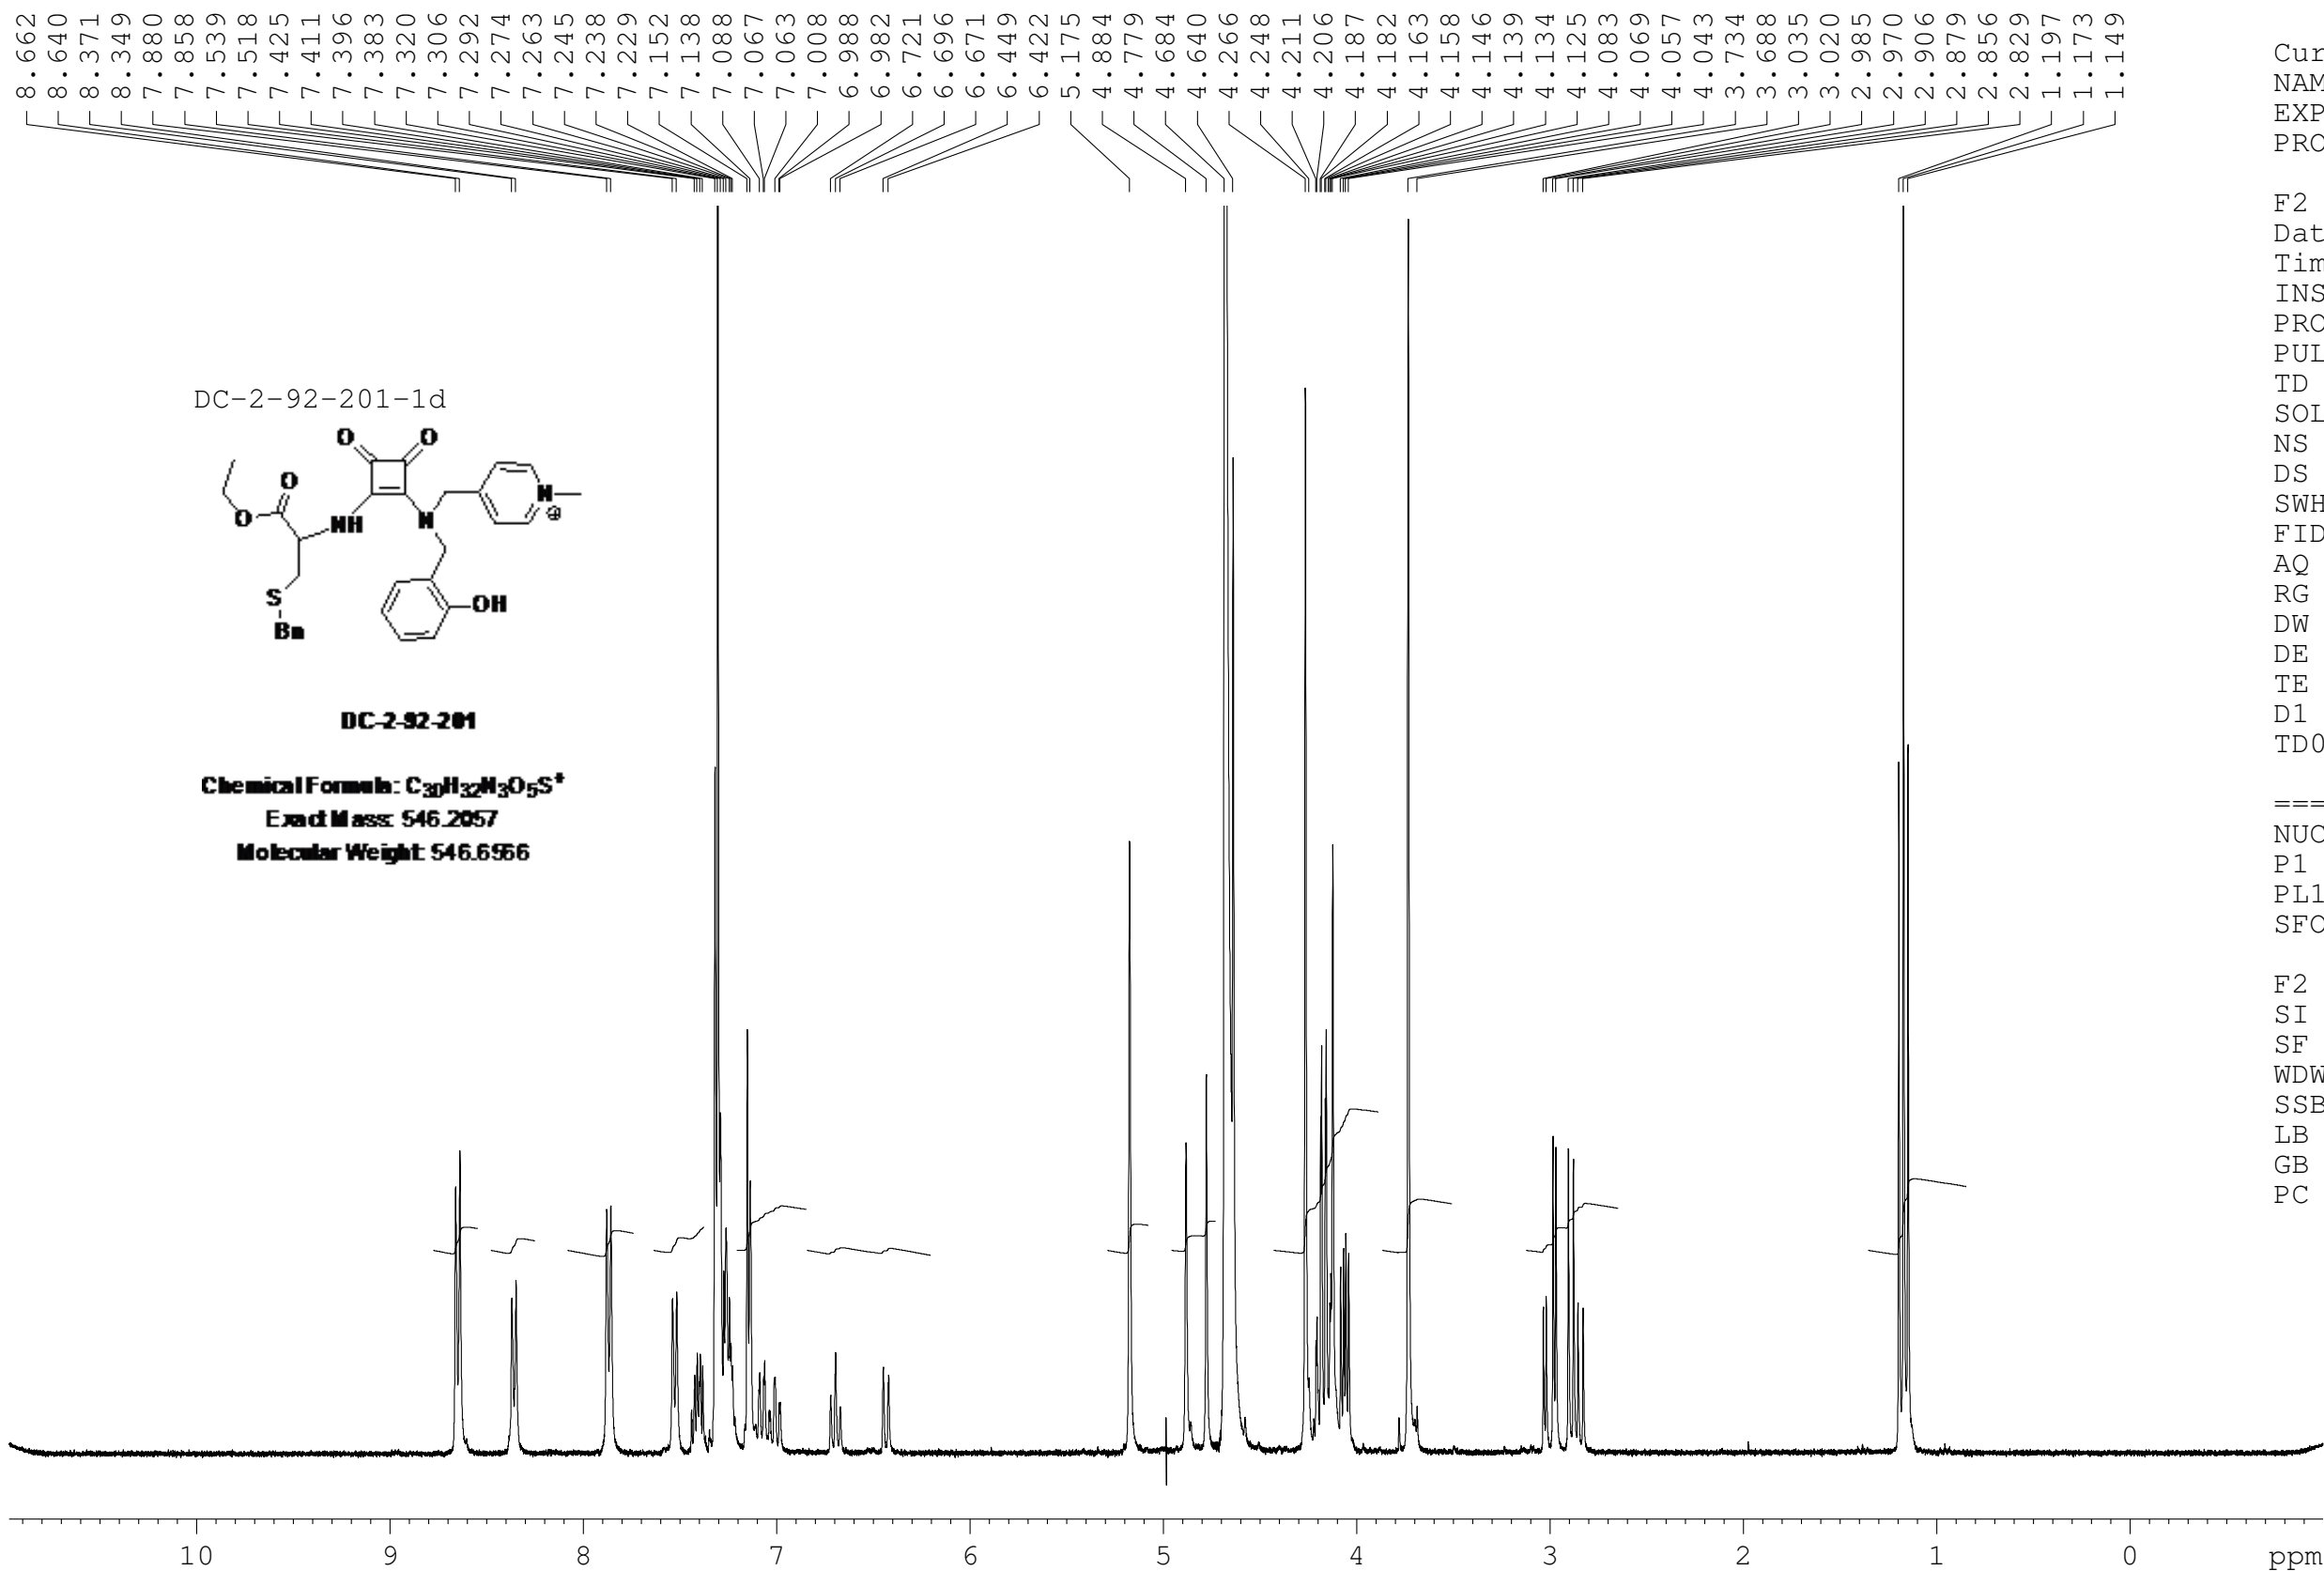

Current Data Parameters  
 NAME DC-2-92-201-1d  
 EXPNO 1  
 PROCNO 1

F2 - Acquisition Parameters  
 Date\_ 20100227  
 Time 11.31  
 INSTRUM spect  
 PROBHD 5 mm QNP 1H/1  
 PULPROG zg  
 TD 32768  
 SOLVENT D2O  
 NS 32  
 DS 0  
 SWH 3591.954 Hz  
 FIDRES 0.109618 Hz  
 AQ 4.5613556 sec  
 RG 512  
 DW 139.200 usec  
 DE 54.00 usec  
 TE 298.2 K  
 D1 1.0000000 sec  
 TD0 1

==== CHANNEL f1 =====  
 NUC1 1H  
 P1 9.75 usec  
 PL1 0.00 dB  
 SFO1 300.1315007 MHz

F2 - Processing parameters  
 SI 32768  
 SF 300.1300042 MHz  
 WDW no  
 SSB 0  
 LB 0.00 Hz  
 GB 0  
 PC 1.00

Integration values:  
 1.000  
 0.433  
 0.783  
 1.068  
 1.882  
 -0.230  
 1.153  
 1.335  
 6.368  
 2.140  
 1.931  
 2.932

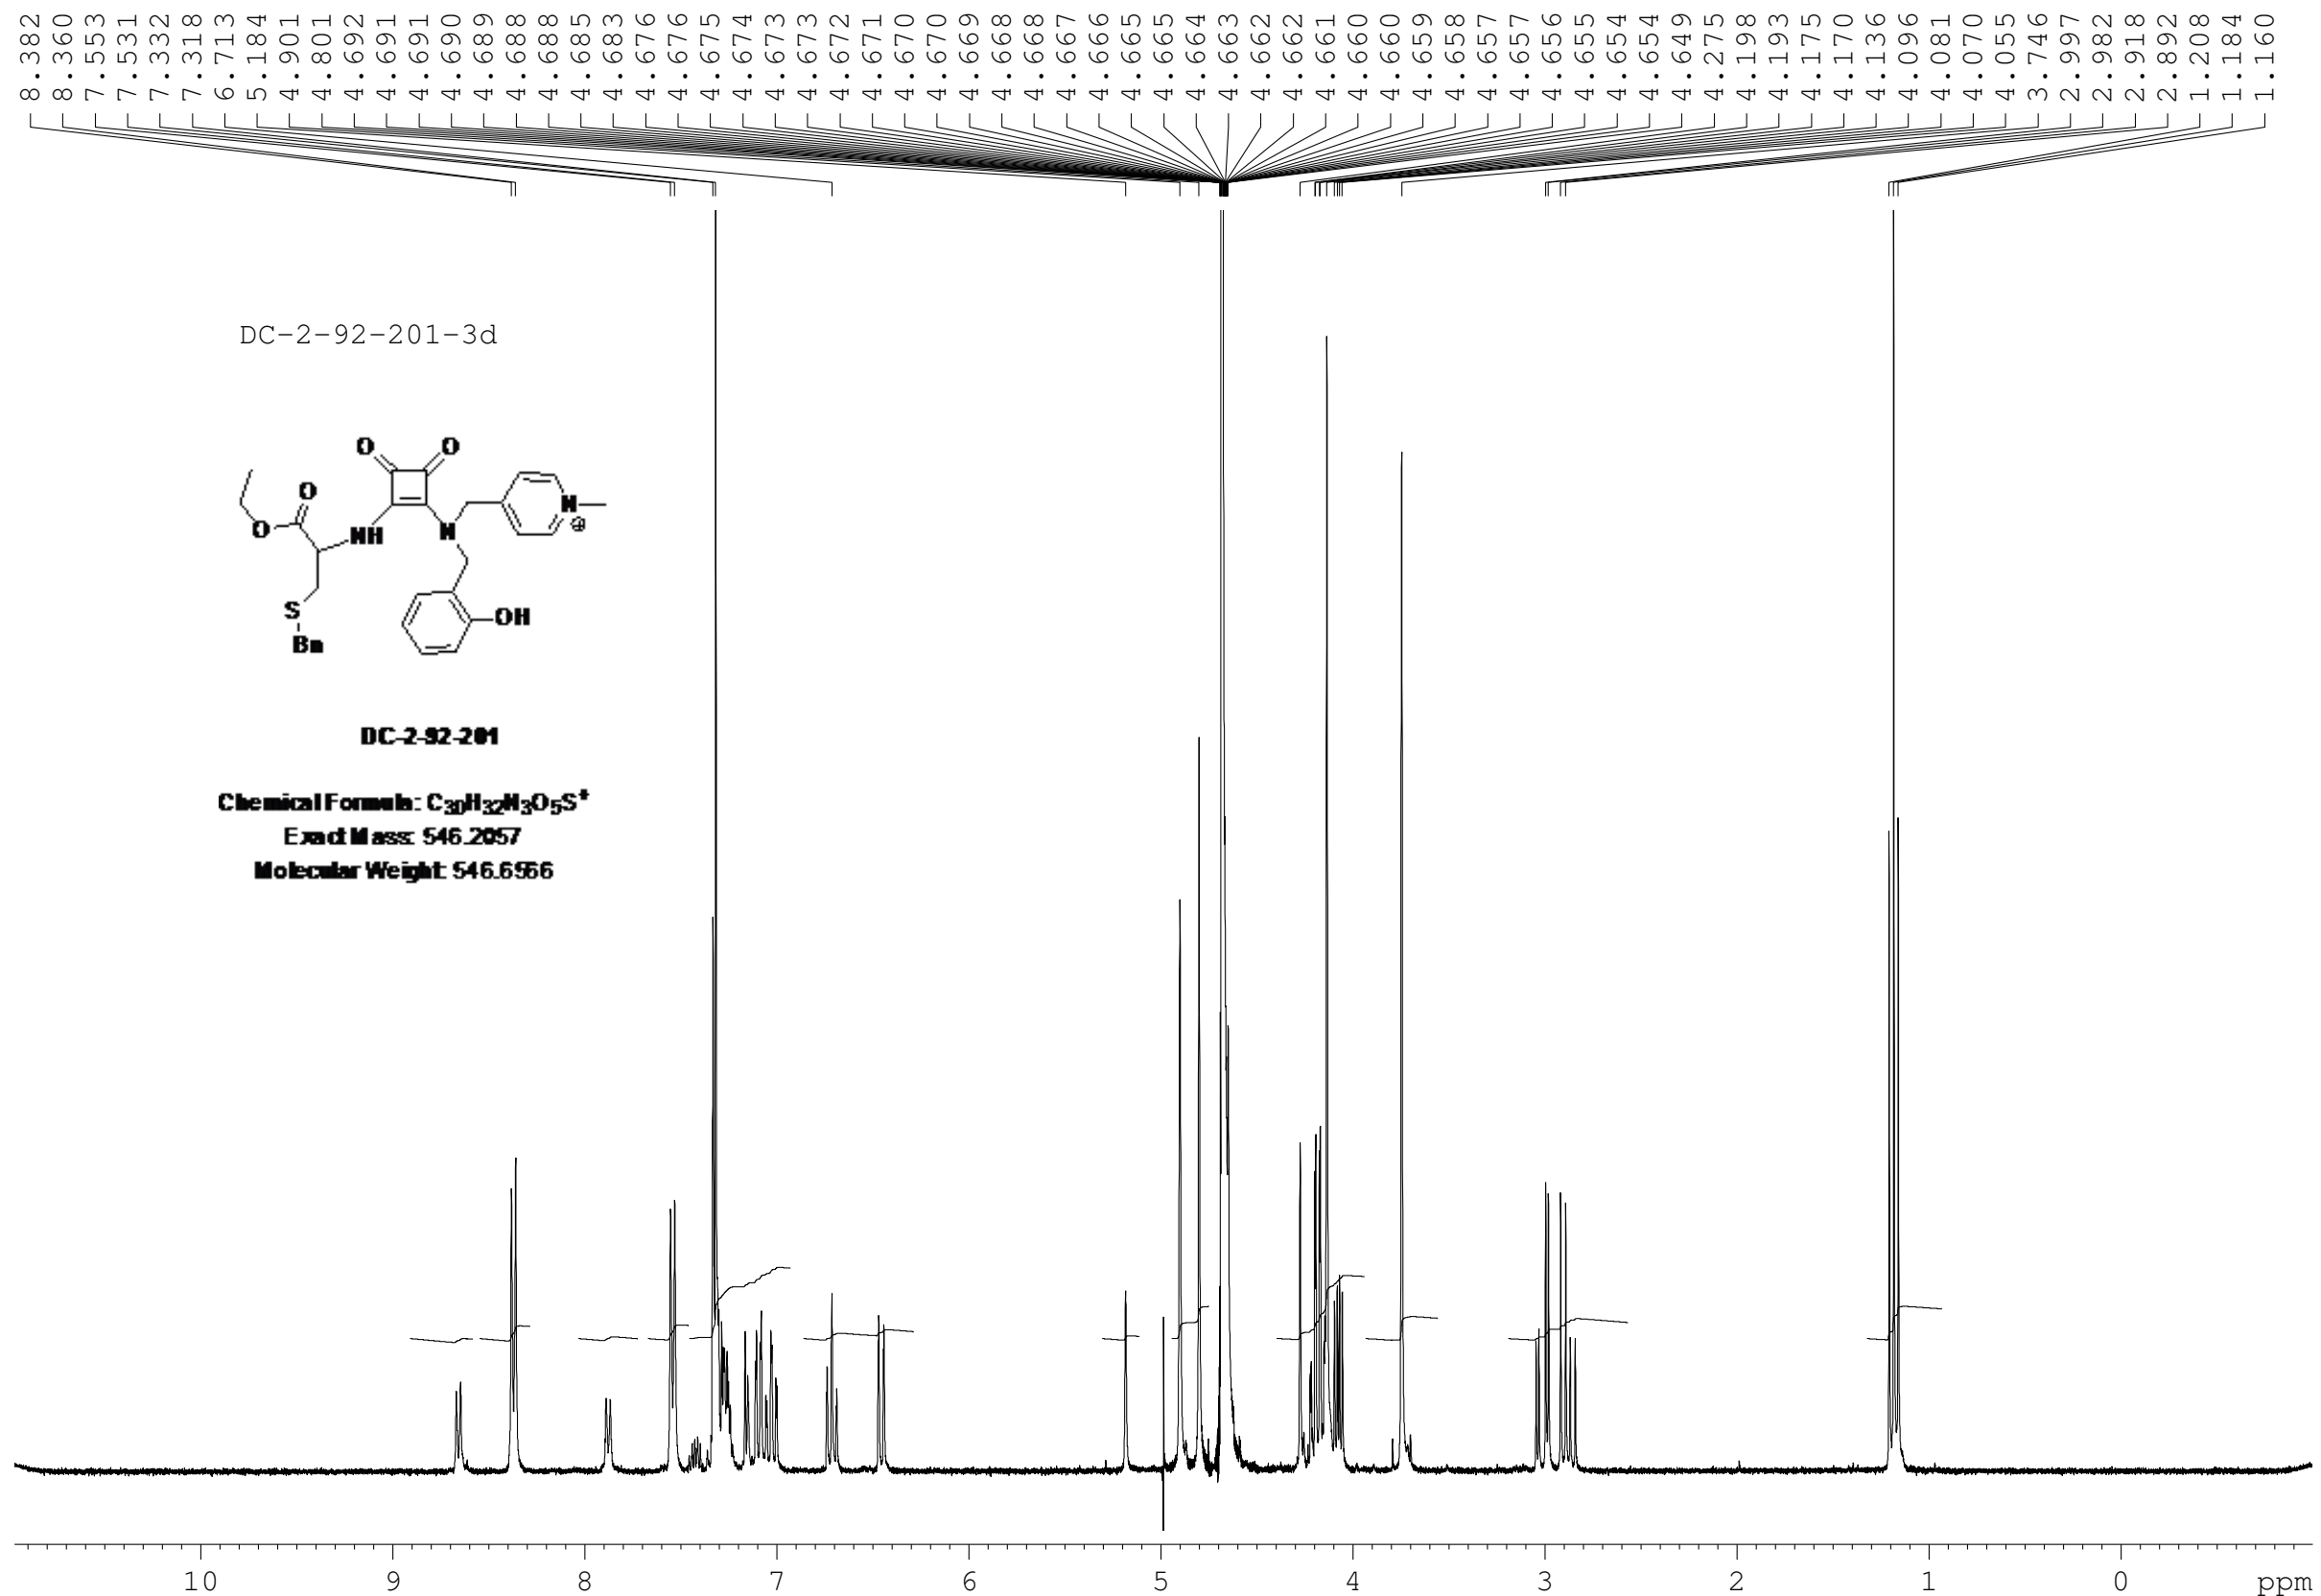

Current Data Parameters  
 NAME DC-2-92-201-3d  
 EXPNO 1  
 PROCNO 1

F2 - Acquisition Parameters  
 Date\_ 20100301  
 Time 18.23  
 INSTRUM spect  
 PROBHD 5 mm QNP 1H/1  
 PULPROG zg  
 TD 32768  
 SOLVENT D2O  
 NS 16  
 DS 0  
 SWH 3591.954 Hz  
 FIDRES 0.109618 Hz  
 AQ 4.5613556 sec  
 RG 456.1  
 DW 139.200 usec  
 DE 54.00 usec  
 TE 299.2 K  
 D1 1.00000000 sec  
 TD0 1

==== CHANNEL f1 =====  
 NUC1 1H  
 P1 9.75 usec  
 PL1 0.00 dB  
 SFO1 300.1315007 MHz

F2 - Processing parameters  
 SI 32768  
 SF 300.1300042 MHz  
 WDW no  
 SSB 0  
 LB 0.00 Hz  
 GB 0  
 PC 1.00

8.384  
8.361  
7.556  
7.534  
7.338  
7.335  
7.321  
6.716  
4.904  
4.807  
4.685  
4.683  
4.675  
4.674  
4.673  
4.672  
4.671  
4.670  
4.669  
4.668  
4.667  
4.666  
4.665  
4.665  
4.664  
4.663  
4.662  
4.662  
4.661  
4.660  
4.660  
4.659  
4.658  
4.657  
4.657  
4.656  
4.655  
4.654  
4.654  
4.653  
4.652  
4.651  
4.651  
4.650  
4.649  
4.649  
4.648  
4.647  
4.200  
4.195  
4.176  
4.171  
4.137  
4.072  
4.057  
3.748  
2.999  
2.984  
2.921  
2.894  
1.210  
1.208  
1.186  
1.184  
1.162

Dc-2-92-201-6d

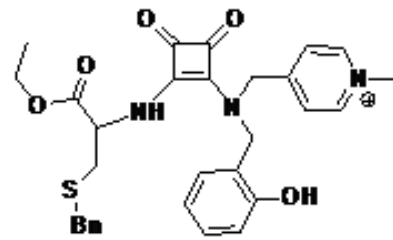

**DC-2-92-201**

**Chemical Formula: C<sub>30</sub>H<sub>32</sub>N<sub>3</sub>O<sub>5</sub>S<sup>+</sup>**

**Exact Mass: 546.2057**

**Molecular Weight: 546.6566**

Current Data Parameters  
NAME Dc-2-92-201-6d  
EXPNO 1  
PROCNO 1

F2 - Acquisition Parameters  
Date\_ 20100303  
Time 18.12  
INSTRUM spect  
PROBHD 5 mm QNP 1H/1  
PULPROG zg  
TD 32768  
SOLVENT D2O  
NS 16  
DS 0  
SWH 3591.954 Hz  
FIDRES 0.109618 Hz  
AQ 4.5613556 sec  
RG 456.1  
DW 139.200 usec  
DE 54.00 usec  
TE 299.2 K  
D1 1.00000000 sec  
TD0 1

==== CHANNEL f1 =====  
NUC1 1H  
P1 9.75 usec  
PL1 0.00 dB  
SFO1 300.1315007 MHz

F2 - Processing parameters  
SI 32768  
SF 300.1300042 MHz  
WDW no  
SSB 0  
LB 0.00 Hz  
GB 0  
PC 1.00

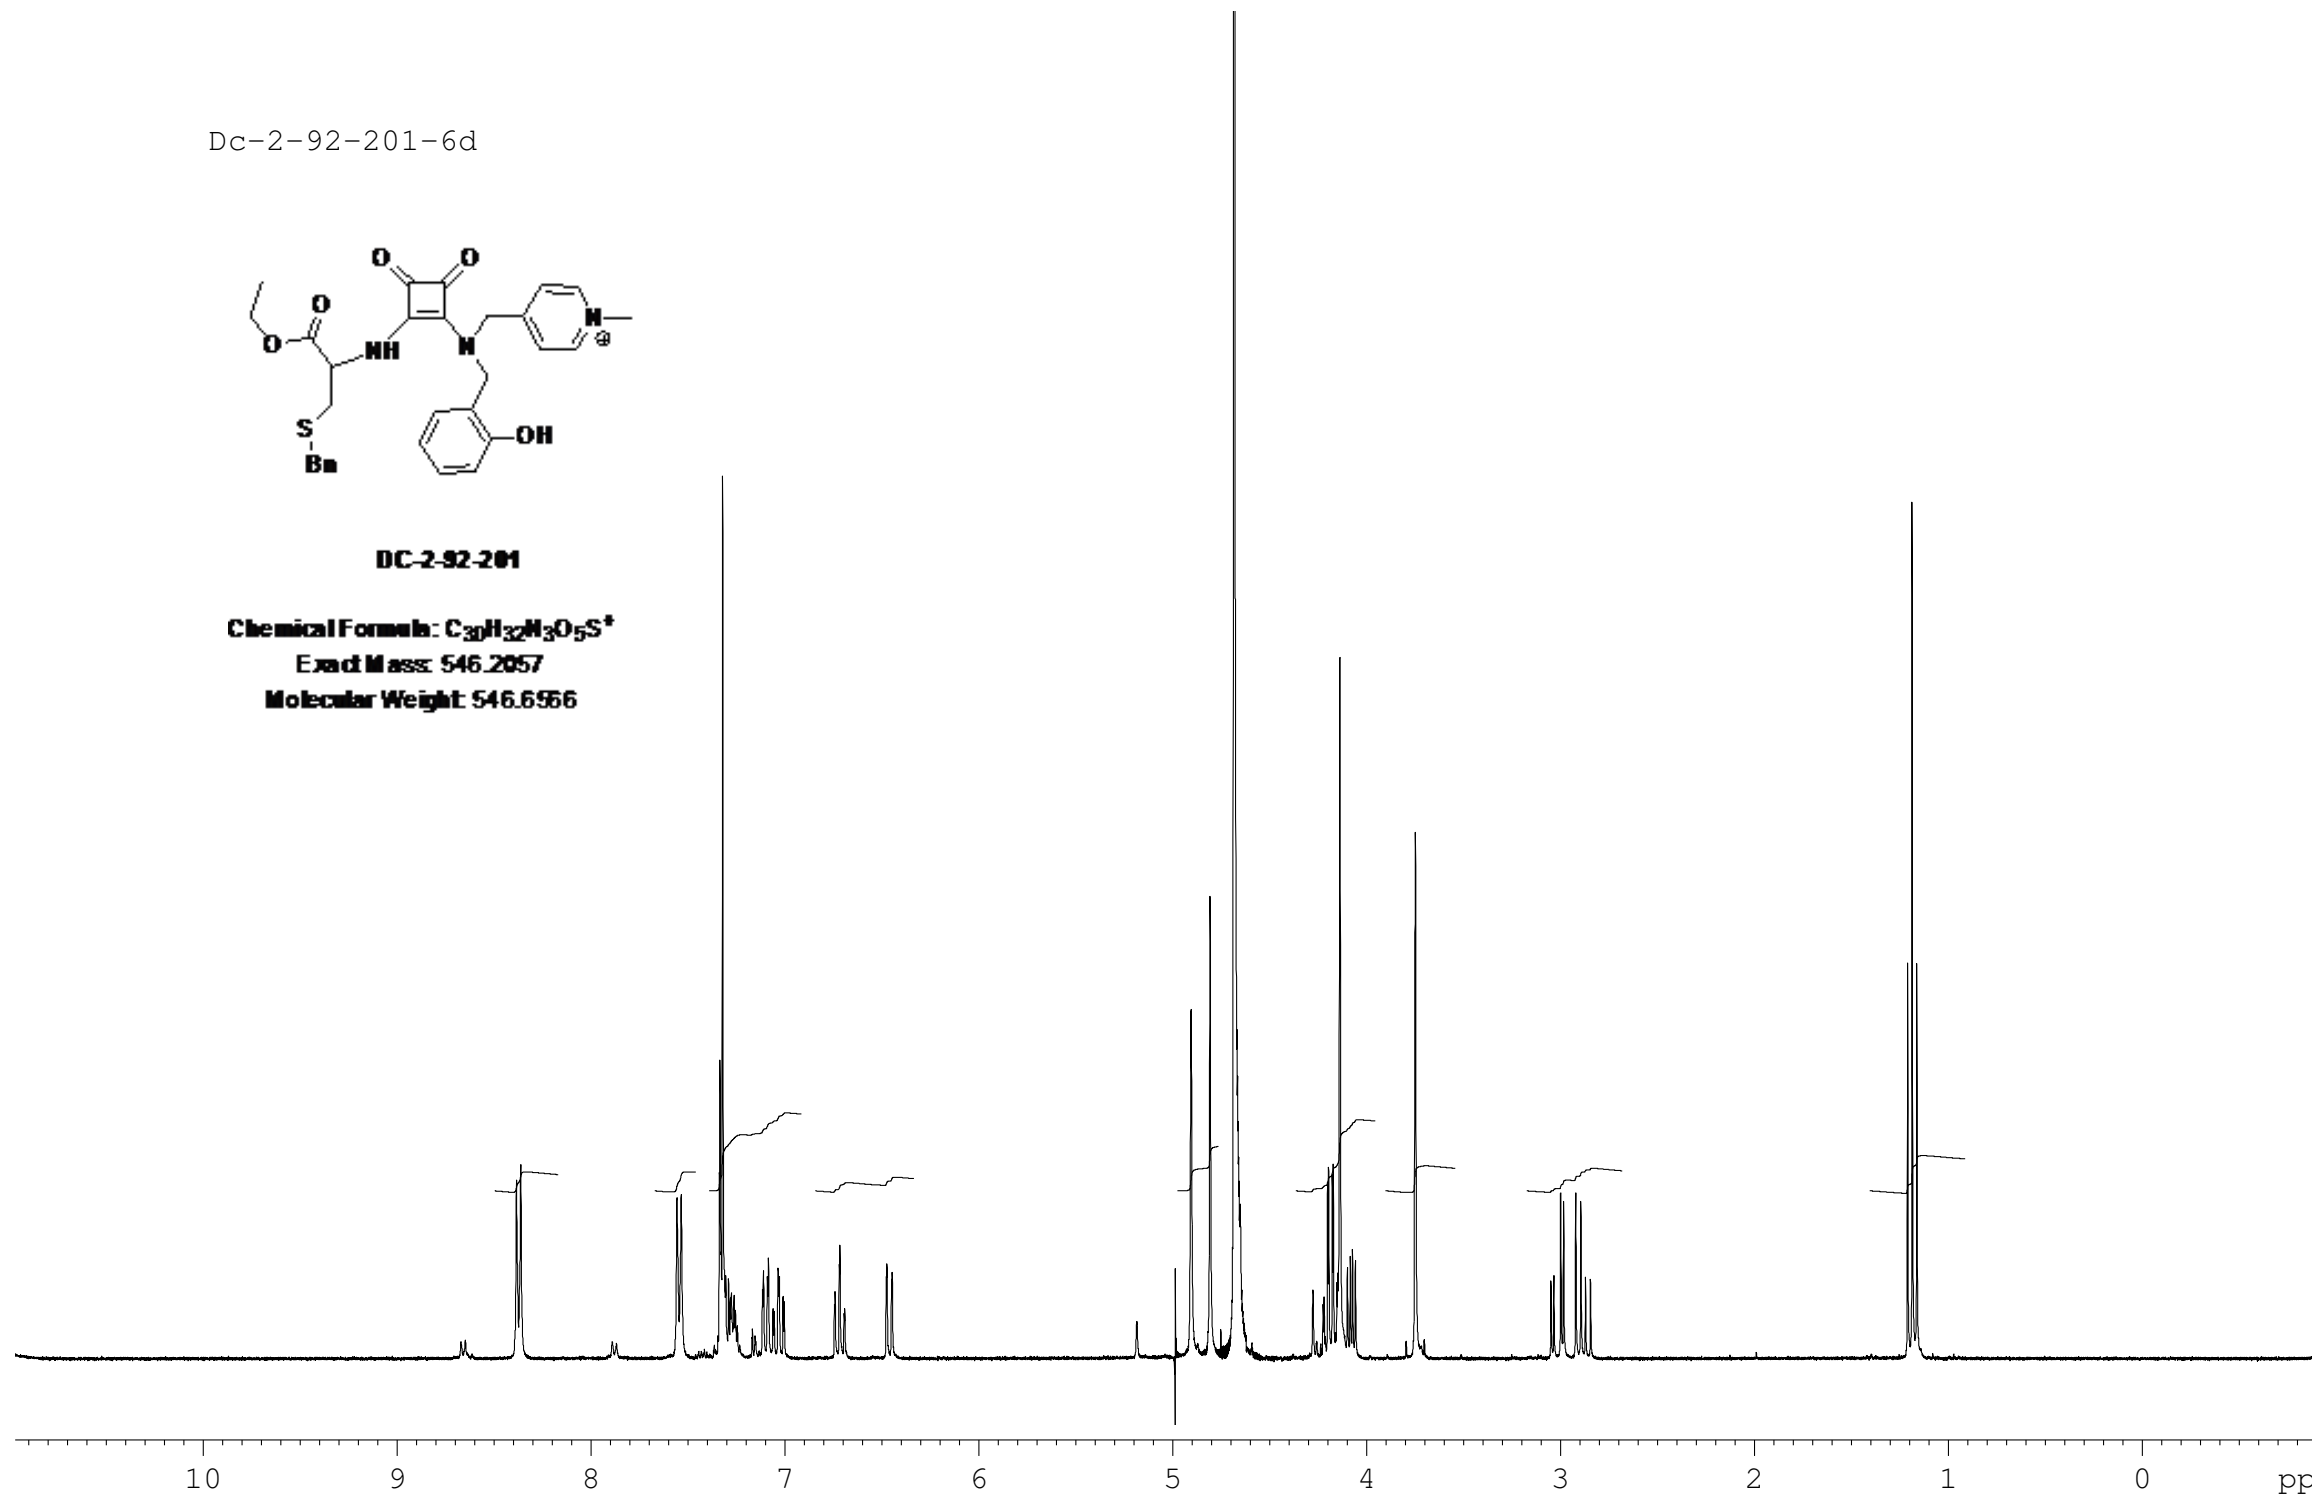

1.438  
1.653  
6.828  
1.081  
3.941  
6.216  
2.000  
1.774  
2.837

# Elemental Composition Report

Tolerance = 50.0 PPM / DBE: min = -1.5, max = 80.0

Selected filters: None

Monoisotopic Mass, Even Electron Ions

74 formula(e) evaluated with 1 results within limits (all results (up to 1000) for each mass)

Elements Used:

C: 0-30 H: 0-32 N: 0-3 O: 0-5 Na: 0-1 S: 0-1

File name: dc-2-92-201b

Notebook Ref: 25563

IU Database#: 25563

Instrument: LCT KC366

Test name: Accurate Mass

15-Jun-2010 17:23:10

Method: ESI-TOF

Base Peak Mass: 546.20770264

dc-2-92-201b-rerun5 67 (1.686) AM (Cen,8, 90.00, Ar,5000.0,922.36,0.70,LS 7); Sm (SG, 2x4.00); Cm (67:68)

1: TOF MS ES+  
644

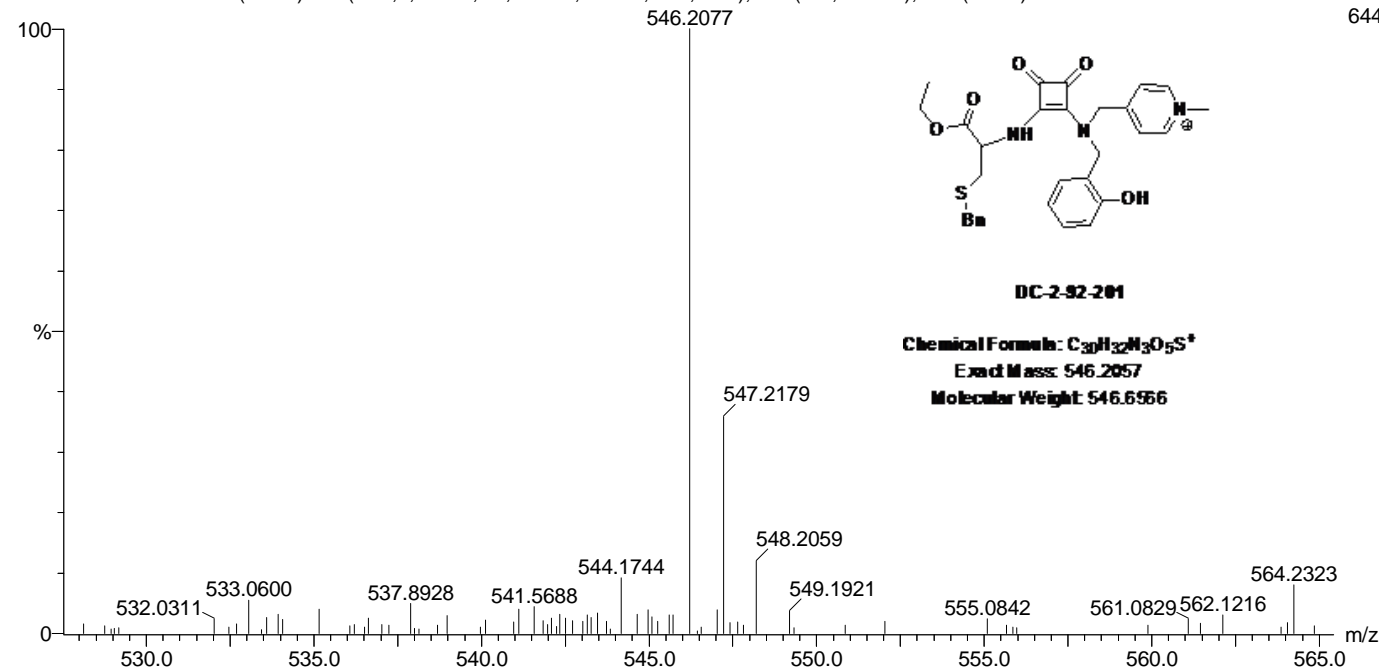

| Mass     | RA     | Calc. Mass | mDa | PPM | DBE  | i-FIT | Formula         |
|----------|--------|------------|-----|-----|------|-------|-----------------|
| 546.2077 | 100.00 | 546.2063   | 1.4 | 2.6 | 16.5 | 0.2   | C30 H32 N3 O5 S |

8.679  
 8.657  
 7.900  
 7.878  
 7.438  
 7.426  
 7.409  
 7.396  
 7.308  
 7.281  
 7.167  
 7.152  
 5.197  
 4.718  
 4.716  
 4.714  
 4.712  
 4.712  
 4.711  
 4.710  
 4.710  
 4.709  
 4.708  
 4.707  
 4.707  
 4.706  
 4.705  
 4.704  
 4.704  
 4.703  
 4.702  
 4.702  
 4.701  
 4.700  
 4.699  
 4.699  
 4.698  
 4.697  
 4.696  
 4.696  
 4.695  
 4.694  
 4.693  
 4.683  
 4.668  
 4.668  
 4.664  
 4.283  
 3.917  
 3.903  
 3.876  
 3.864  
 3.847  
 3.824  
 3.806  
 3.756  
 3.743  
 3.739  
 3.725

Current Data Parameters  
 NAME DC-2-69-100-5min  
 EXPNO 1  
 PROCNO 1

F2 - Acquisition Parameters  
 Date\_ 20100219  
 Time 10.08  
 INSTRUM spect  
 PROBHD 5 mm QNP 1H/1  
 PULPROG zg  
 TD 32768  
 SOLVENT D2O  
 NS 32  
 DS 0  
 SWH 3591.954 Hz  
 FIDRES 0.109618 Hz  
 AQ 4.5613556 sec  
 RG 256  
 DW 139.200 usec  
 DE 54.00 usec  
 TE 298.2 K  
 D1 1.00000000 sec  
 TD0 1

==== CHANNEL f1 =====  
 NUC1 1H  
 P1 9.75 usec  
 PL1 0.00 dB  
 SFO1 300.1315007 MHz

F2 - Processing parameters  
 SI 32768  
 SF 300.1300042 MHz  
 WDW no  
 SSB 0  
 LB 0.00 Hz  
 GB 0  
 PC 1.00

DC-2-69-100-5min

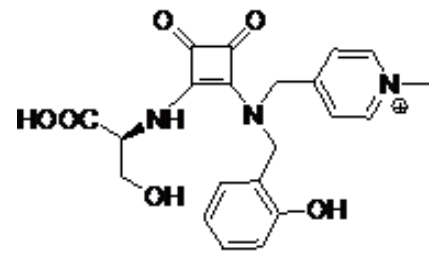

**DC-2-69-1**

**Chemical Formula: C<sub>21</sub>H<sub>22</sub>N<sub>3</sub>O<sub>6</sub><sup>+</sup>**  
**Exact Mass: 412.1503**  
**Molecular Weight: 412.4153**

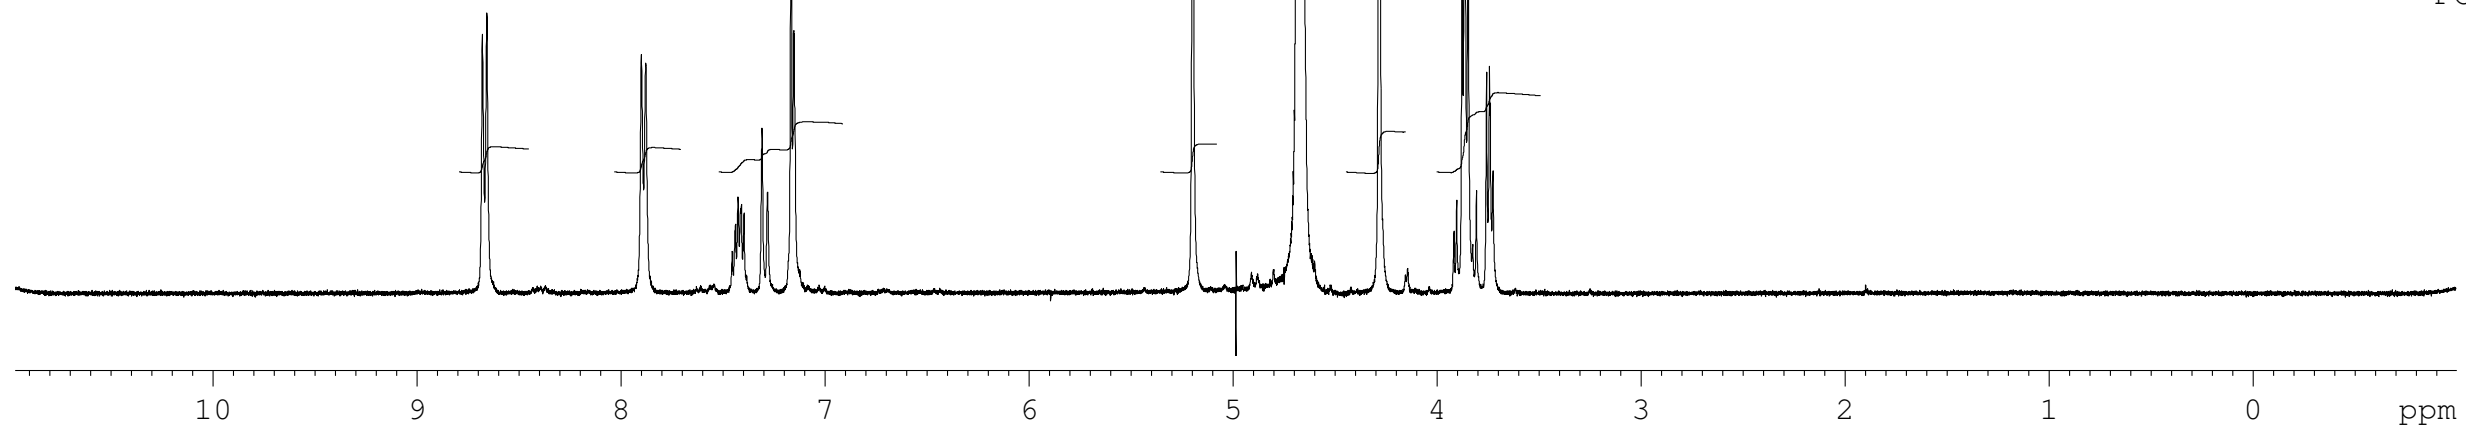

2.000  
 1.983  
 4.230  
 2.420  
 3.523  
 6.683

8.672  
8.650  
8.388  
8.365  
7.894  
7.872  
7.562  
7.539  
7.308  
7.162  
7.148  
7.144  
5.191  
4.910  
4.806  
4.704  
4.703  
4.702  
4.702  
4.701  
4.700  
4.699  
4.699  
4.698  
4.697  
4.696  
4.696  
4.695  
4.694  
4.693  
4.693  
4.692  
4.691  
4.690  
4.690  
4.689  
4.683  
4.682  
4.676  
4.675  
4.674  
4.673  
4.673  
4.672  
4.671  
4.670  
4.670  
4.669  
4.668  
4.667  
4.666  
4.665  
4.665  
4.664  
4.663  
4.662  
4.662  
4.657  
4.642  
4.640  
4.639  
4.277  
4.138  
3.886  
3.885  
3.884  
3.871  
3.869  
3.815  
3.800  
3.785

Current Data Parameters  
NAME DC-2-69-100-1d  
EXPNO 1  
PROCNO 1

F2 - Acquisition Parameters  
Date\_ 20100220  
Time 10.42  
INSTRUM spect  
PROBHD 5 mm QNP 1H/1  
PULPROG zg  
TD 32768  
SOLVENT D2O  
NS 32  
DS 0  
SWH 3591.954 Hz  
FIDRES 0.109618 Hz  
AQ 4.5613556 sec  
RG 574.7  
DW 139.200 usec  
DE 54.00 usec  
TE 298.2 K  
D1 1.00000000 sec  
TD0 1

==== CHANNEL f1 =====  
NUC1 1H  
P1 9.75 usec  
PL1 0.00 dB  
SFO1 300.1315007 MHz

F2 - Processing parameters  
SI 32768  
SF 300.1300042 MHz  
WDW no  
SSB 0  
LB 0.00 Hz  
GB 0  
PC 1.00

DC-2-69-100-1d



DC-2-69-1

Chemical Formula:  $C_{21}H_{22}N_3O_6^+$   
Exact Mass: 412.1503  
Molecular Weight: 412.4153

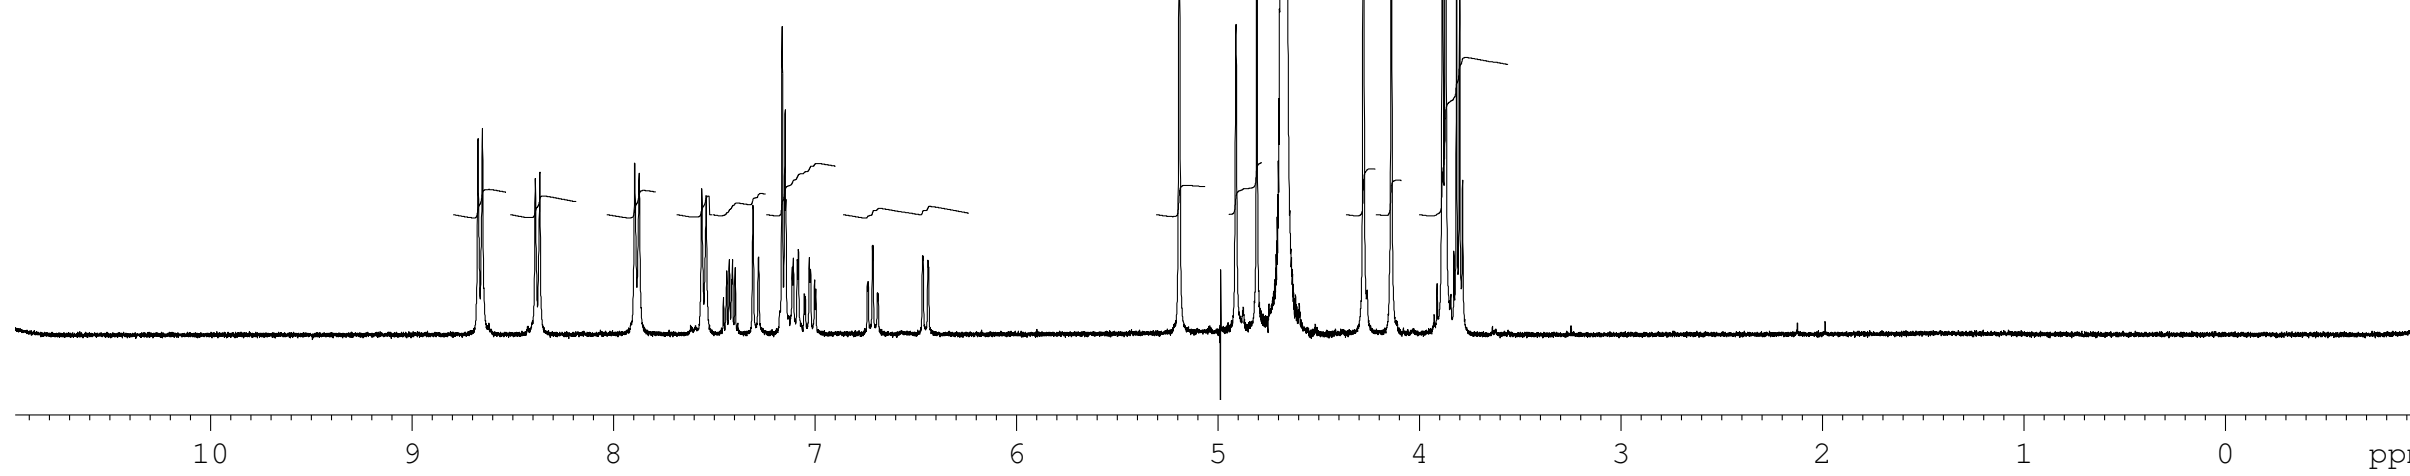

1.000  
0.572  
1.012  
0.826  
0.921  
2.172  
0.059  
1.248  
2.337  
2.035  
1.530  
6.744

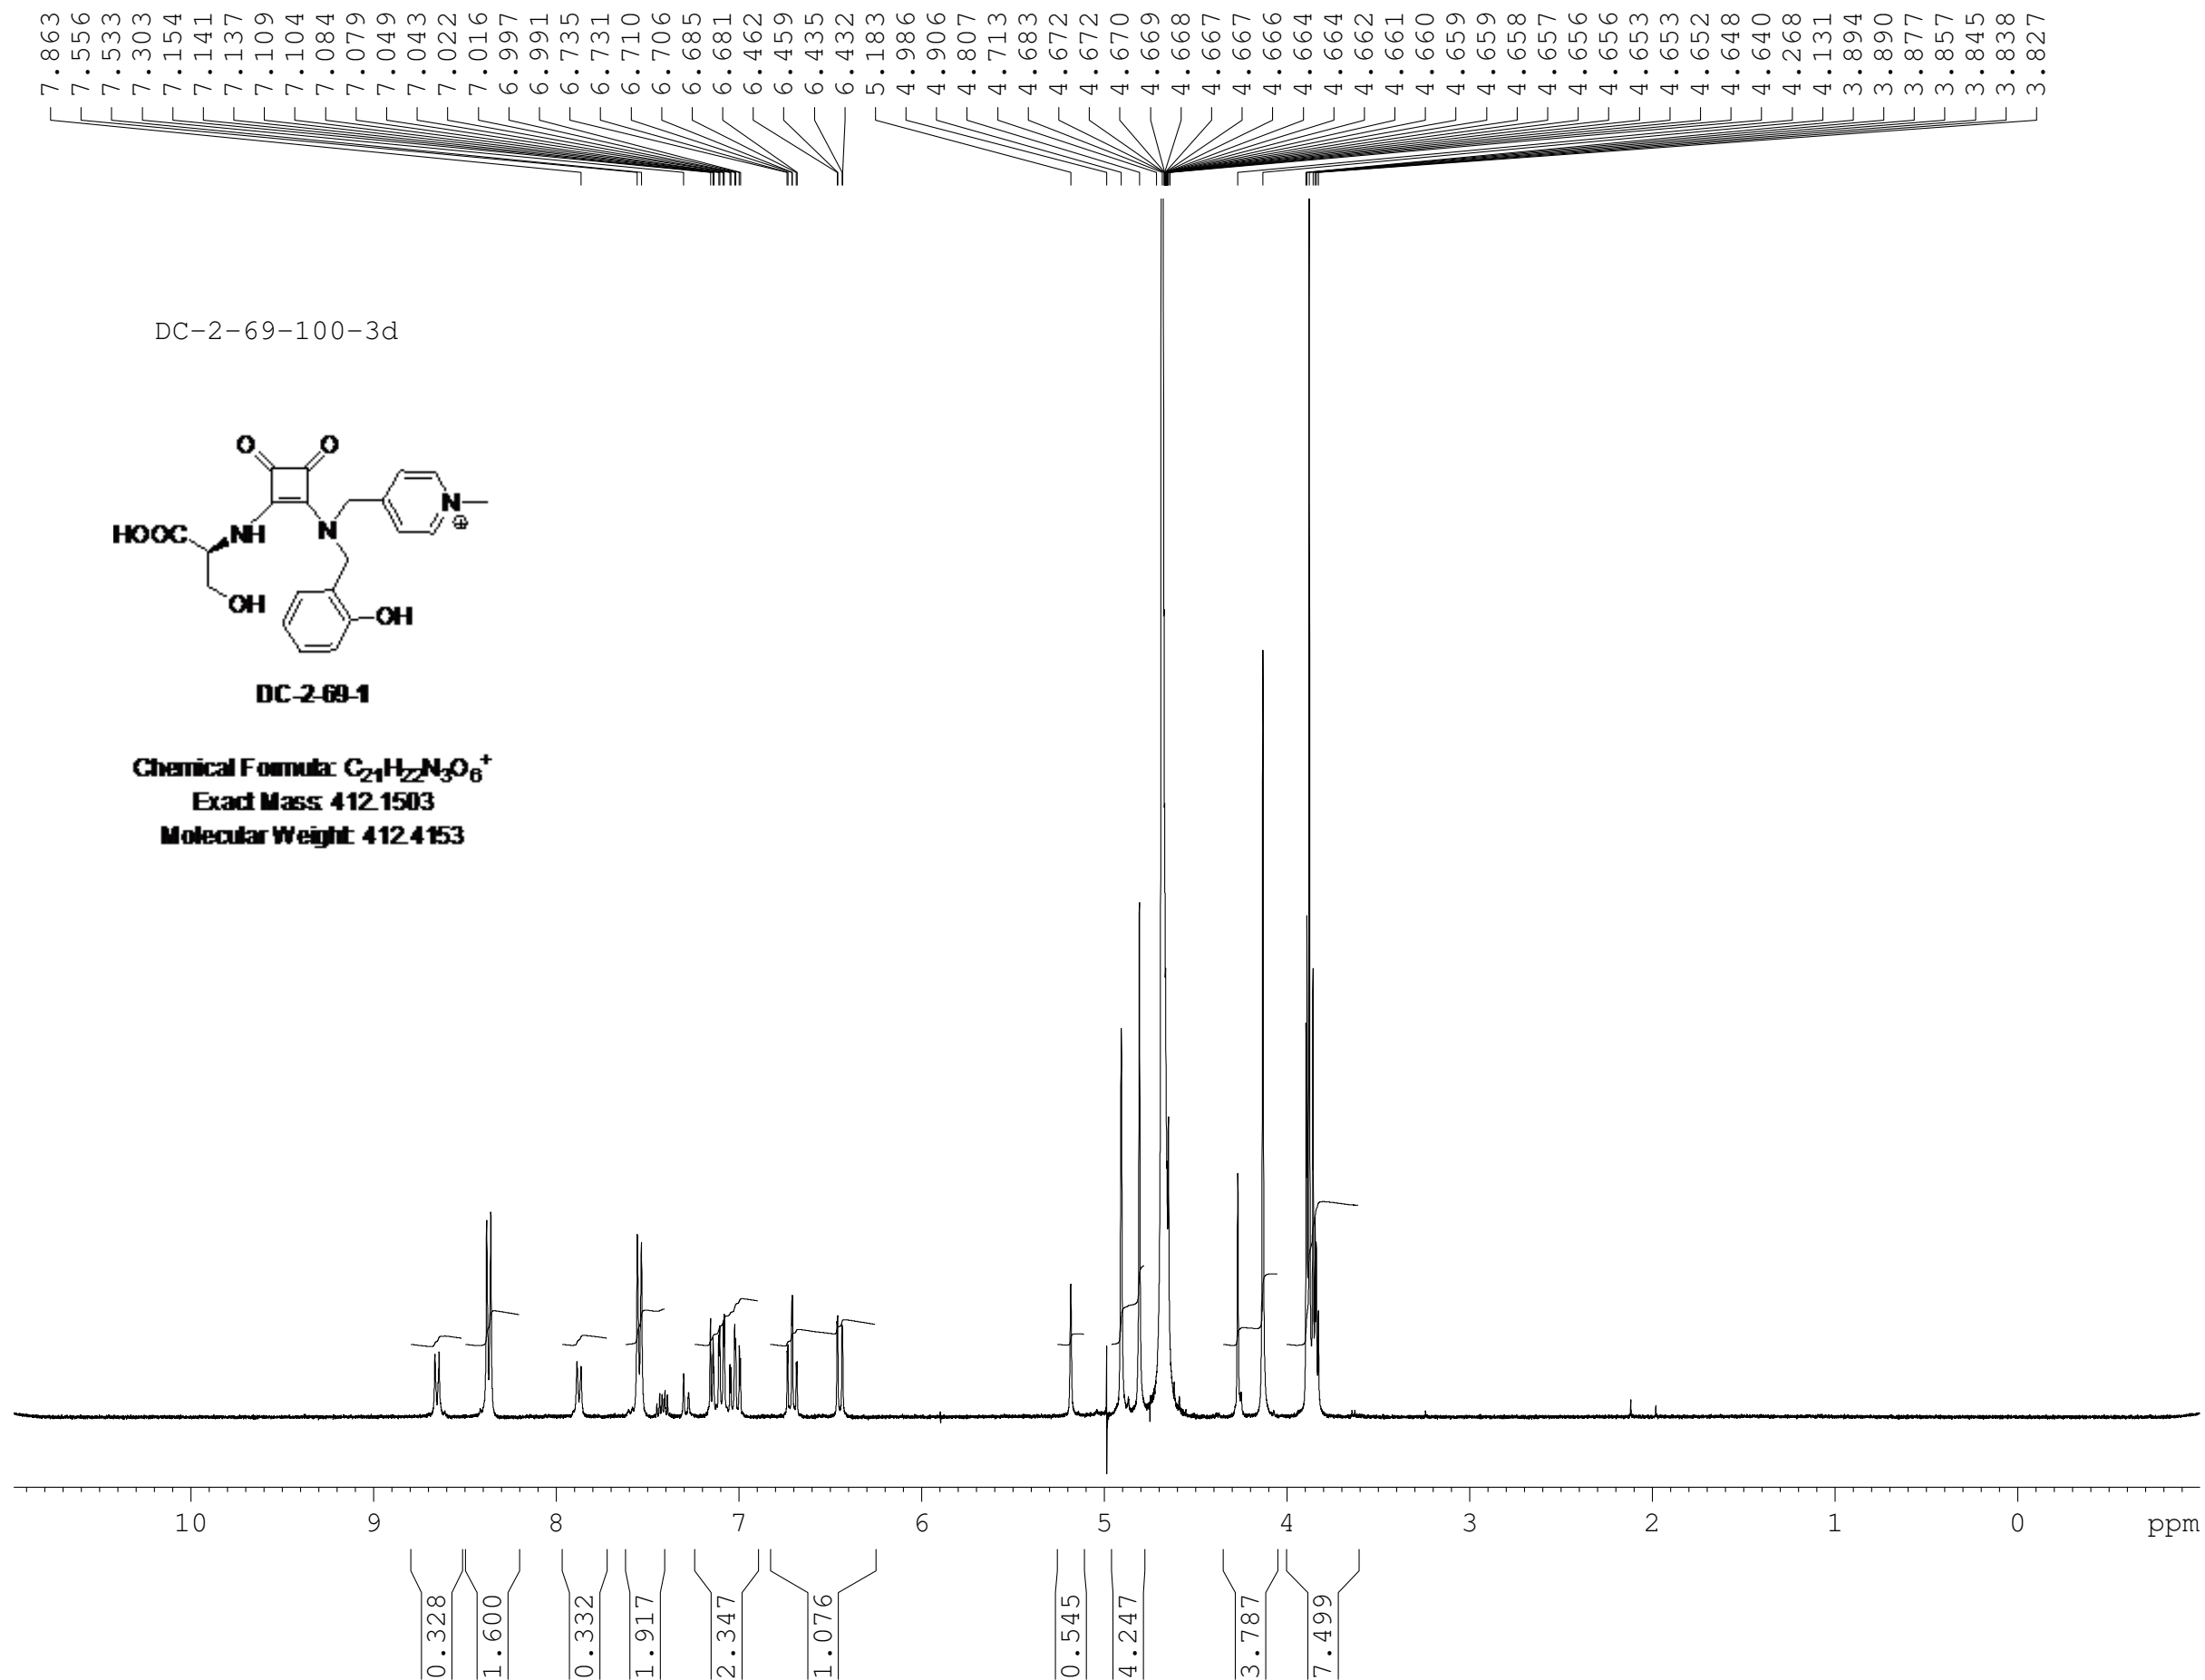

Current Data Parameters  
 NAME DC-2-69-100-3d  
 EXPNO 1  
 PROCNO 1

F2 - Acquisition Parameters  
 Date\_ 20100222  
 Time 9.14  
 INSTRUM spect  
 PROBHD 5 mm QNP 1H/1  
 PULPROG zg  
 TD 32768  
 SOLVENT D2O  
 NS 32  
 DS 0  
 SWH 3591.954 Hz  
 FIDRES 0.109618 Hz  
 AQ 4.5613556 sec  
 RG 362  
 DW 139.200 usec  
 DE 54.00 usec  
 TE 298.2 K  
 D1 1.00000000 sec  
 TD0 1

==== CHANNEL f1 =====  
 NUC1 1H  
 P1 9.75 usec  
 PL1 0.00 dB  
 SFO1 300.1315007 MHz

F2 - Processing parameters  
 SI 32768  
 SF 300.1300042 MHz  
 WDW no  
 SSB 0  
 LB 0.00 Hz  
 GB 0  
 PC 1.00

8.386  
 8.363  
 7.562  
 7.540  
 7.118  
 7.112  
 7.093  
 7.087  
 7.057  
 7.051  
 7.031  
 7.026  
 7.005  
 6.999  
 6.743  
 6.739  
 6.718  
 6.714  
 6.693  
 6.689  
 6.471  
 6.468  
 6.444  
 6.441  
 4.914  
 4.817  
 4.720  
 4.715  
 4.715  
 4.714  
 4.712  
 4.712  
 4.711  
 4.710  
 4.710  
 4.709  
 4.708  
 4.707  
 4.707  
 4.706  
 4.705  
 4.704  
 4.704  
 4.703  
 4.702  
 4.701  
 4.701  
 4.700  
 4.699  
 4.698  
 4.697  
 4.696  
 4.696  
 4.683  
 4.653  
 4.273  
 4.137  
 3.911  
 3.900  
 3.892  
 3.886  
 3.878  
 3.867  
 3.859

Current Data Parameters  
 NAME DC-2-69-100-6d  
 EXPNO 1  
 PROCNO 1

F2 - Acquisition Parameters  
 Date\_ 20100225  
 Time 10.34  
 INSTRUM spect  
 PROBHD 5 mm QNP 1H/1  
 PULPROG zg  
 TD 32768  
 SOLVENT D2O  
 NS 32  
 DS 0  
 SWH 3591.954 Hz  
 FIDRES 0.109618 Hz  
 AQ 4.5613556 sec  
 RG 574.7  
 DW 139.200 usec  
 DE 54.00 usec  
 TE 298.2 K  
 D1 1.0000000 sec  
 TD0 1

==== CHANNEL f1 =====  
 NUC1 1H  
 P1 9.75 usec  
 PL1 0.00 dB  
 SFO1 300.1315007 MHz

F2 - Processing parameters  
 SI 32768  
 SF 300.1300042 MHz  
 WDW no  
 SSB 0  
 LB 0.00 Hz  
 GB 0  
 PC 1.00

DC-2-69-100-6d

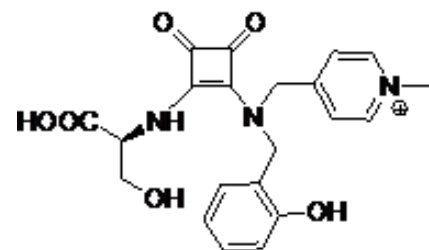

DC-2-69-1

Chemical Formula:  $C_{21}H_{22}N_3O_6^+$   
 Exact Mass: 412.1503  
 Molecular Weight: 412.4153

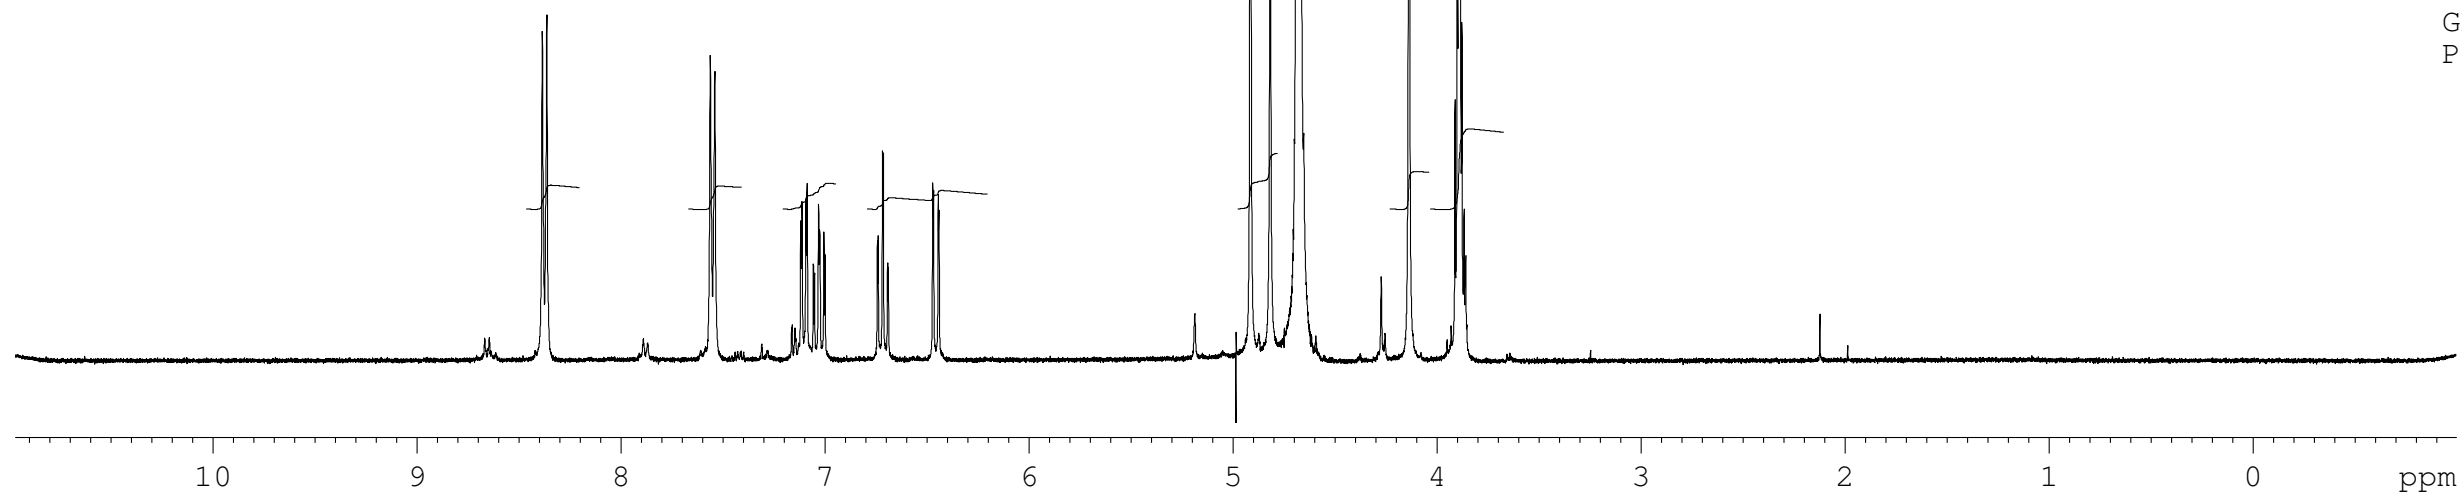

2.000  
 2.050  
 2.356  
 1.375  
 5.246  
 3.437  
 7.213



# Elemental Composition Report

Tolerance = 5.0 PPM / DBE: min = -1.5, max = 80.0  
 Selected filters: None

Monoisotopic Mass, Even Electron Ions

23 formula(e) evaluated with 1 results within limits (all results (up to 1000) for each mass)

Elements Used:

C: 0-21 H: 0-22 N: 0-3 O: 0-6

File name: dc-2-69-100

Instrument: LCT KC366

Method: ESI-TOF

dc-2-69-100 48 (1.203) AM (Cen,8, 90.00, Ar,4000.0,1222.14,0.70,LS 6); Sm (SG, 2x4.00); Cm (48:74)

Notebook Ref: 24824

Test name: Accurate Mass

Base Peak Mass: 412.14990234

IU Database#: 24824

06-May-2010 11:47:20

1: TOF MS ES+  
 1.41e4

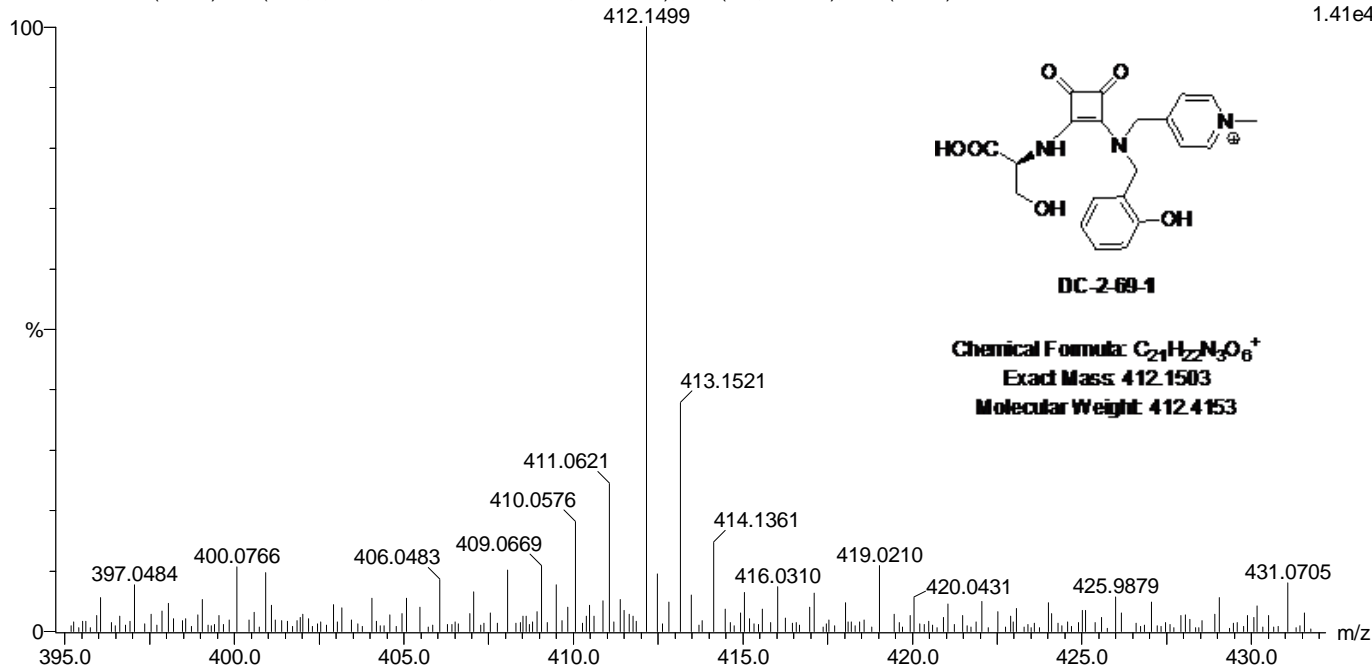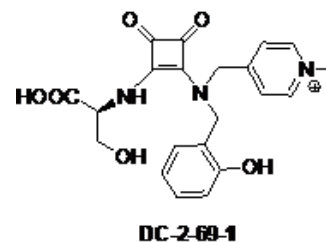

**Chemical Formula: C<sub>21</sub>H<sub>22</sub>N<sub>3</sub>O<sub>6</sub><sup>+</sup>**  
**Exact Mass: 412.1503**  
**Molecular Weight: 412.4153**

Minimum: 80.00 -1.5  
 Maximum: 100.00 5.0 5.0 80.0

| Mass     | RA     | Calc. Mass | mDa  | PPM  | DBE  | i-FIT | Formula       |
|----------|--------|------------|------|------|------|-------|---------------|
| 412.1499 | 100.00 | 412.1509   | -1.0 | -2.4 | 12.5 | 761.1 | C21 H22 N3 O6 |

DC-2-69-200-5min

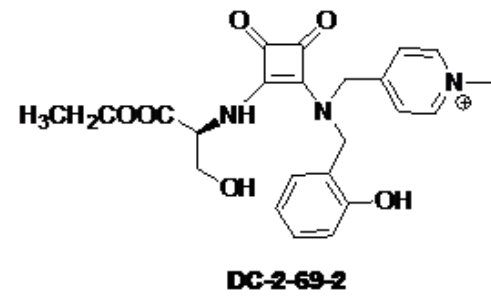

Chemical Formula:  $C_{23}H_{26}N_3O_6^+$   
 Exact Mass: 440.1816  
 Molecular Weight: 440.4685

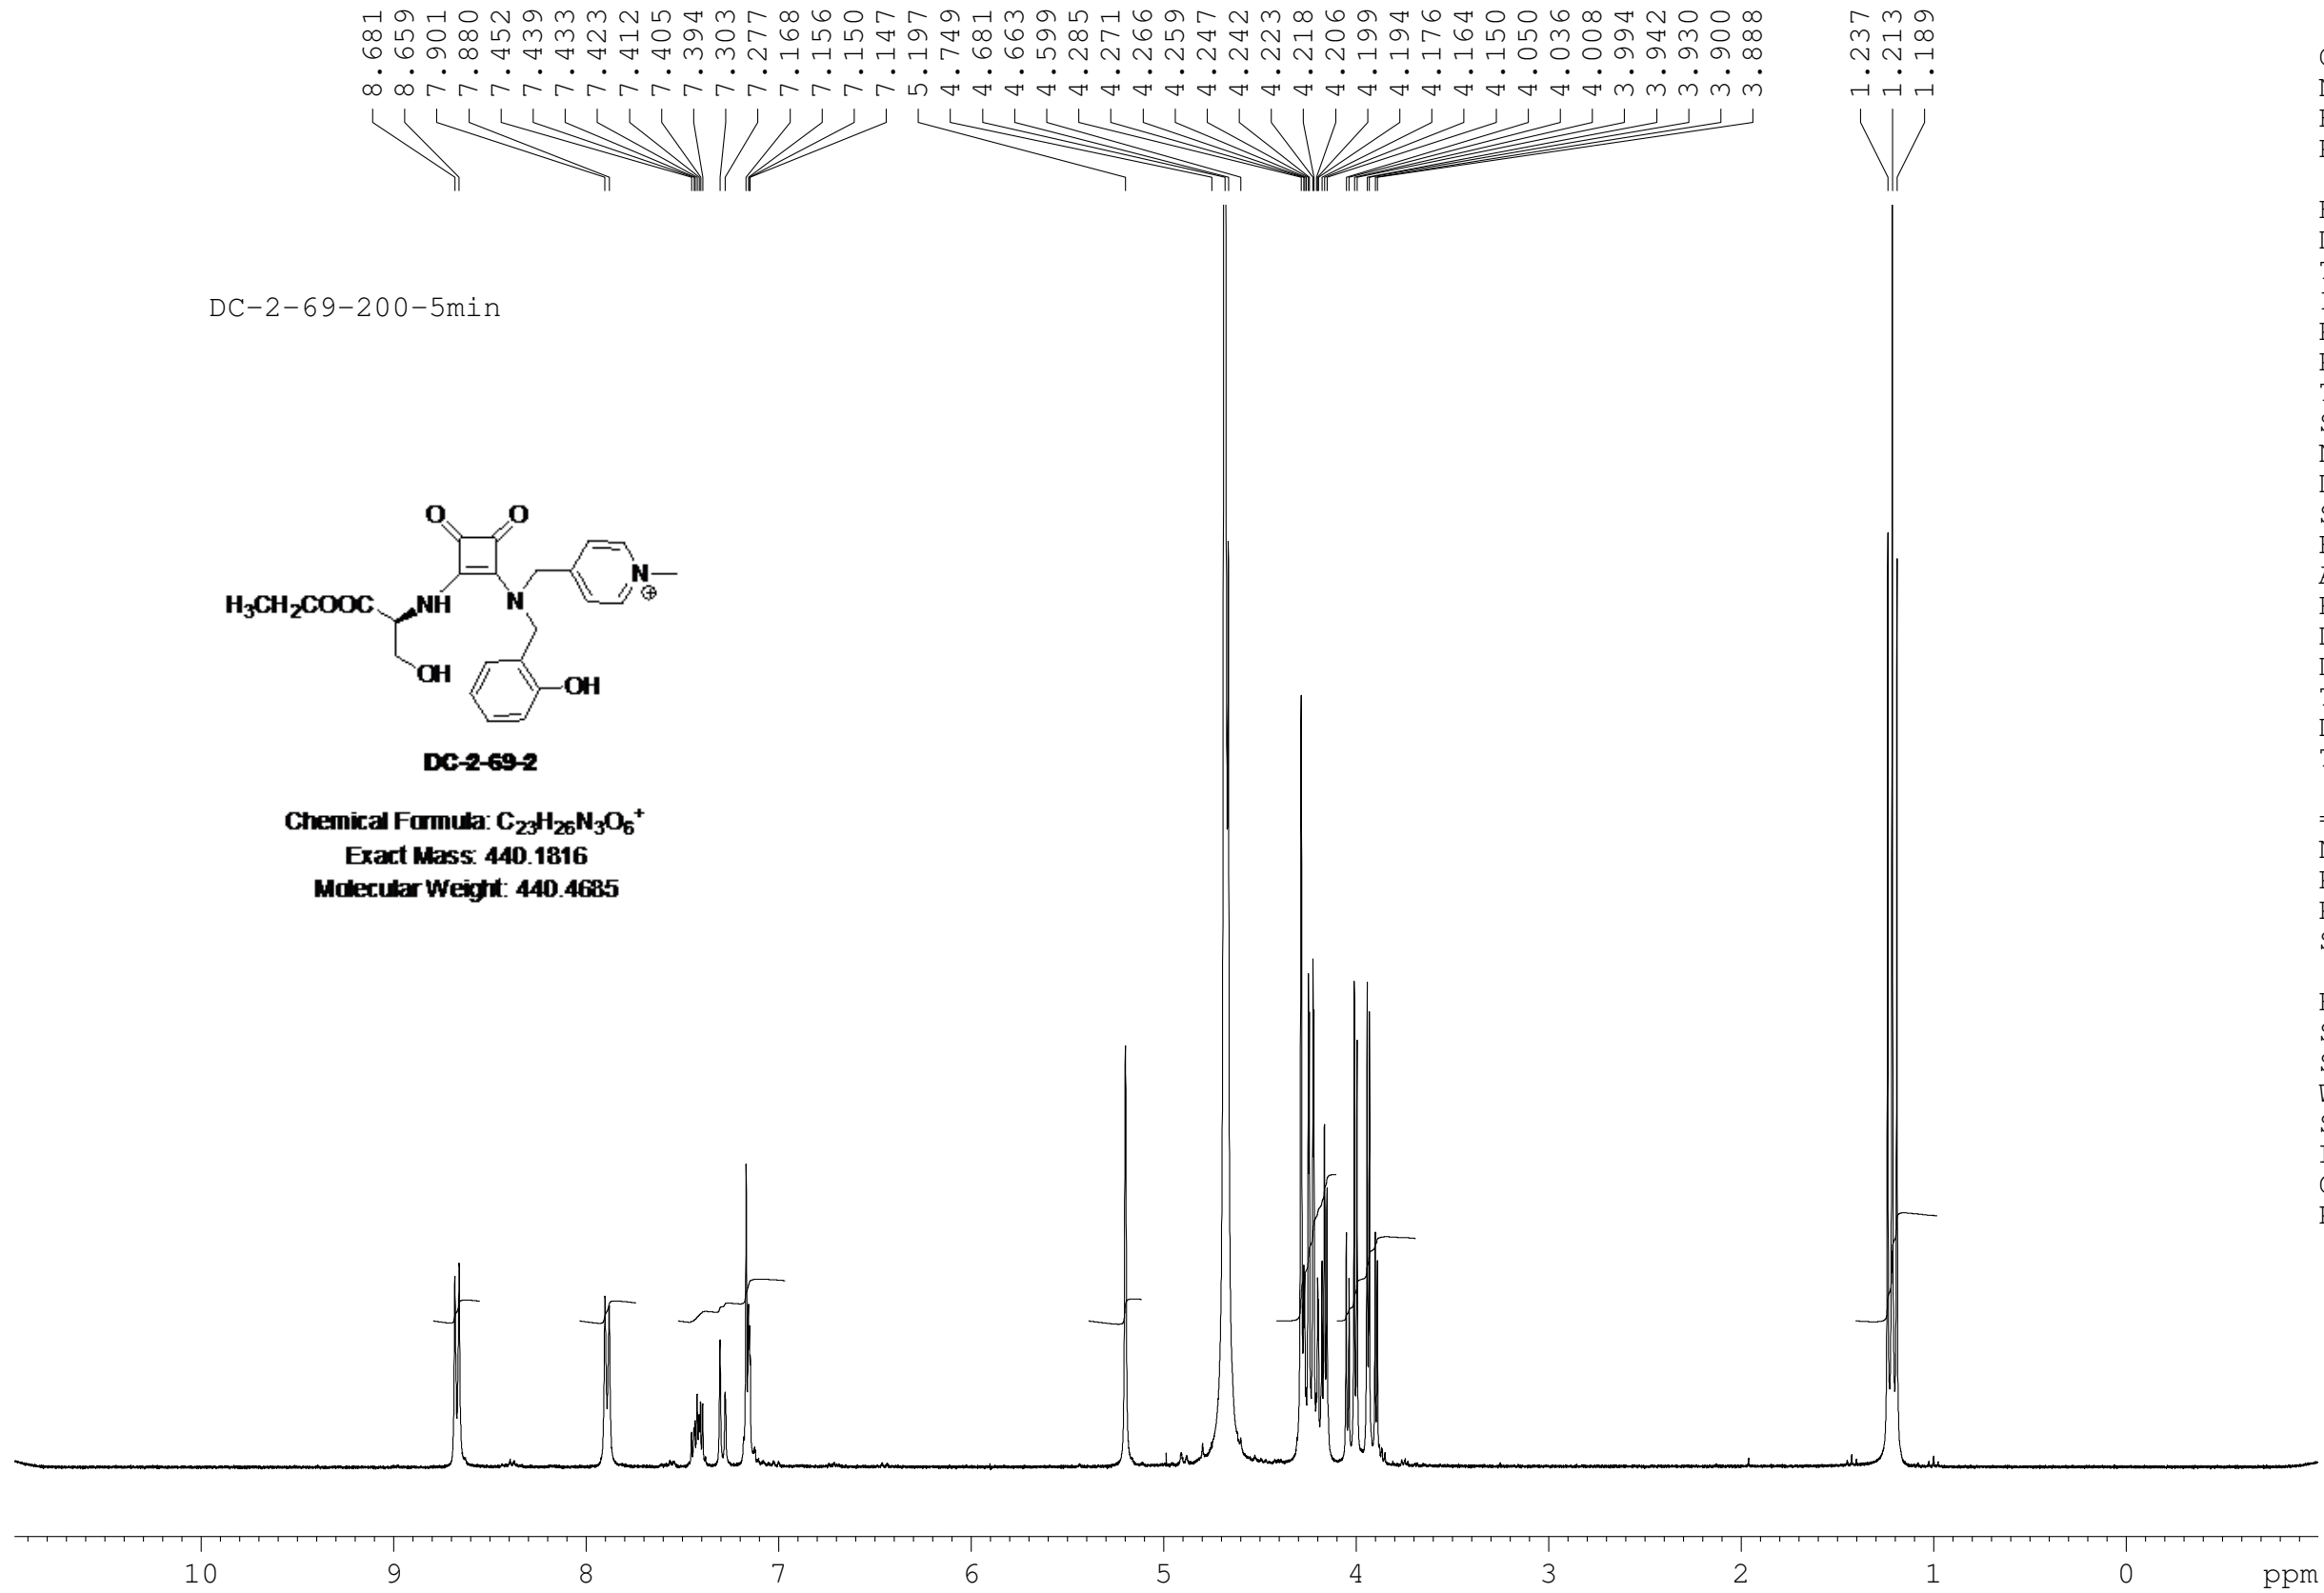

Current Data Parameters  
 NAME DC-2-69-200-5min  
 EXPNO 1  
 PROCNO 1

F2 - Acquisition Parameters  
 Date\_ 20100219  
 Time 10.15  
 INSTRUM spect  
 PROBHD 5 mm QNP 1H/1  
 PULPROG zg  
 TD 32768  
 SOLVENT D2O  
 NS 32  
 DS 0  
 SWH 3591.954 Hz  
 FIDRES 0.109618 Hz  
 AQ 4.5613556 sec  
 RG 256  
 DW 139.200 usec  
 DE 54.00 usec  
 TE 298.2 K  
 D1 1.00000000 sec  
 TD0 1

==== CHANNEL f1 =====  
 NUC1 1H  
 P1 9.75 usec  
 PL1 0.00 dB  
 SFO1 300.1315007 MHz

F2 - Processing parameters  
 SI 32768  
 SF 300.1300042 MHz  
 WDW no  
 SSB 0  
 LB 0.00 Hz  
 GB 0  
 PC 1.00

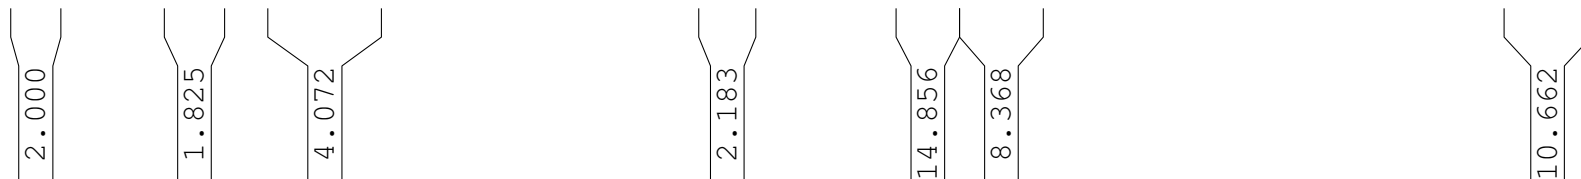

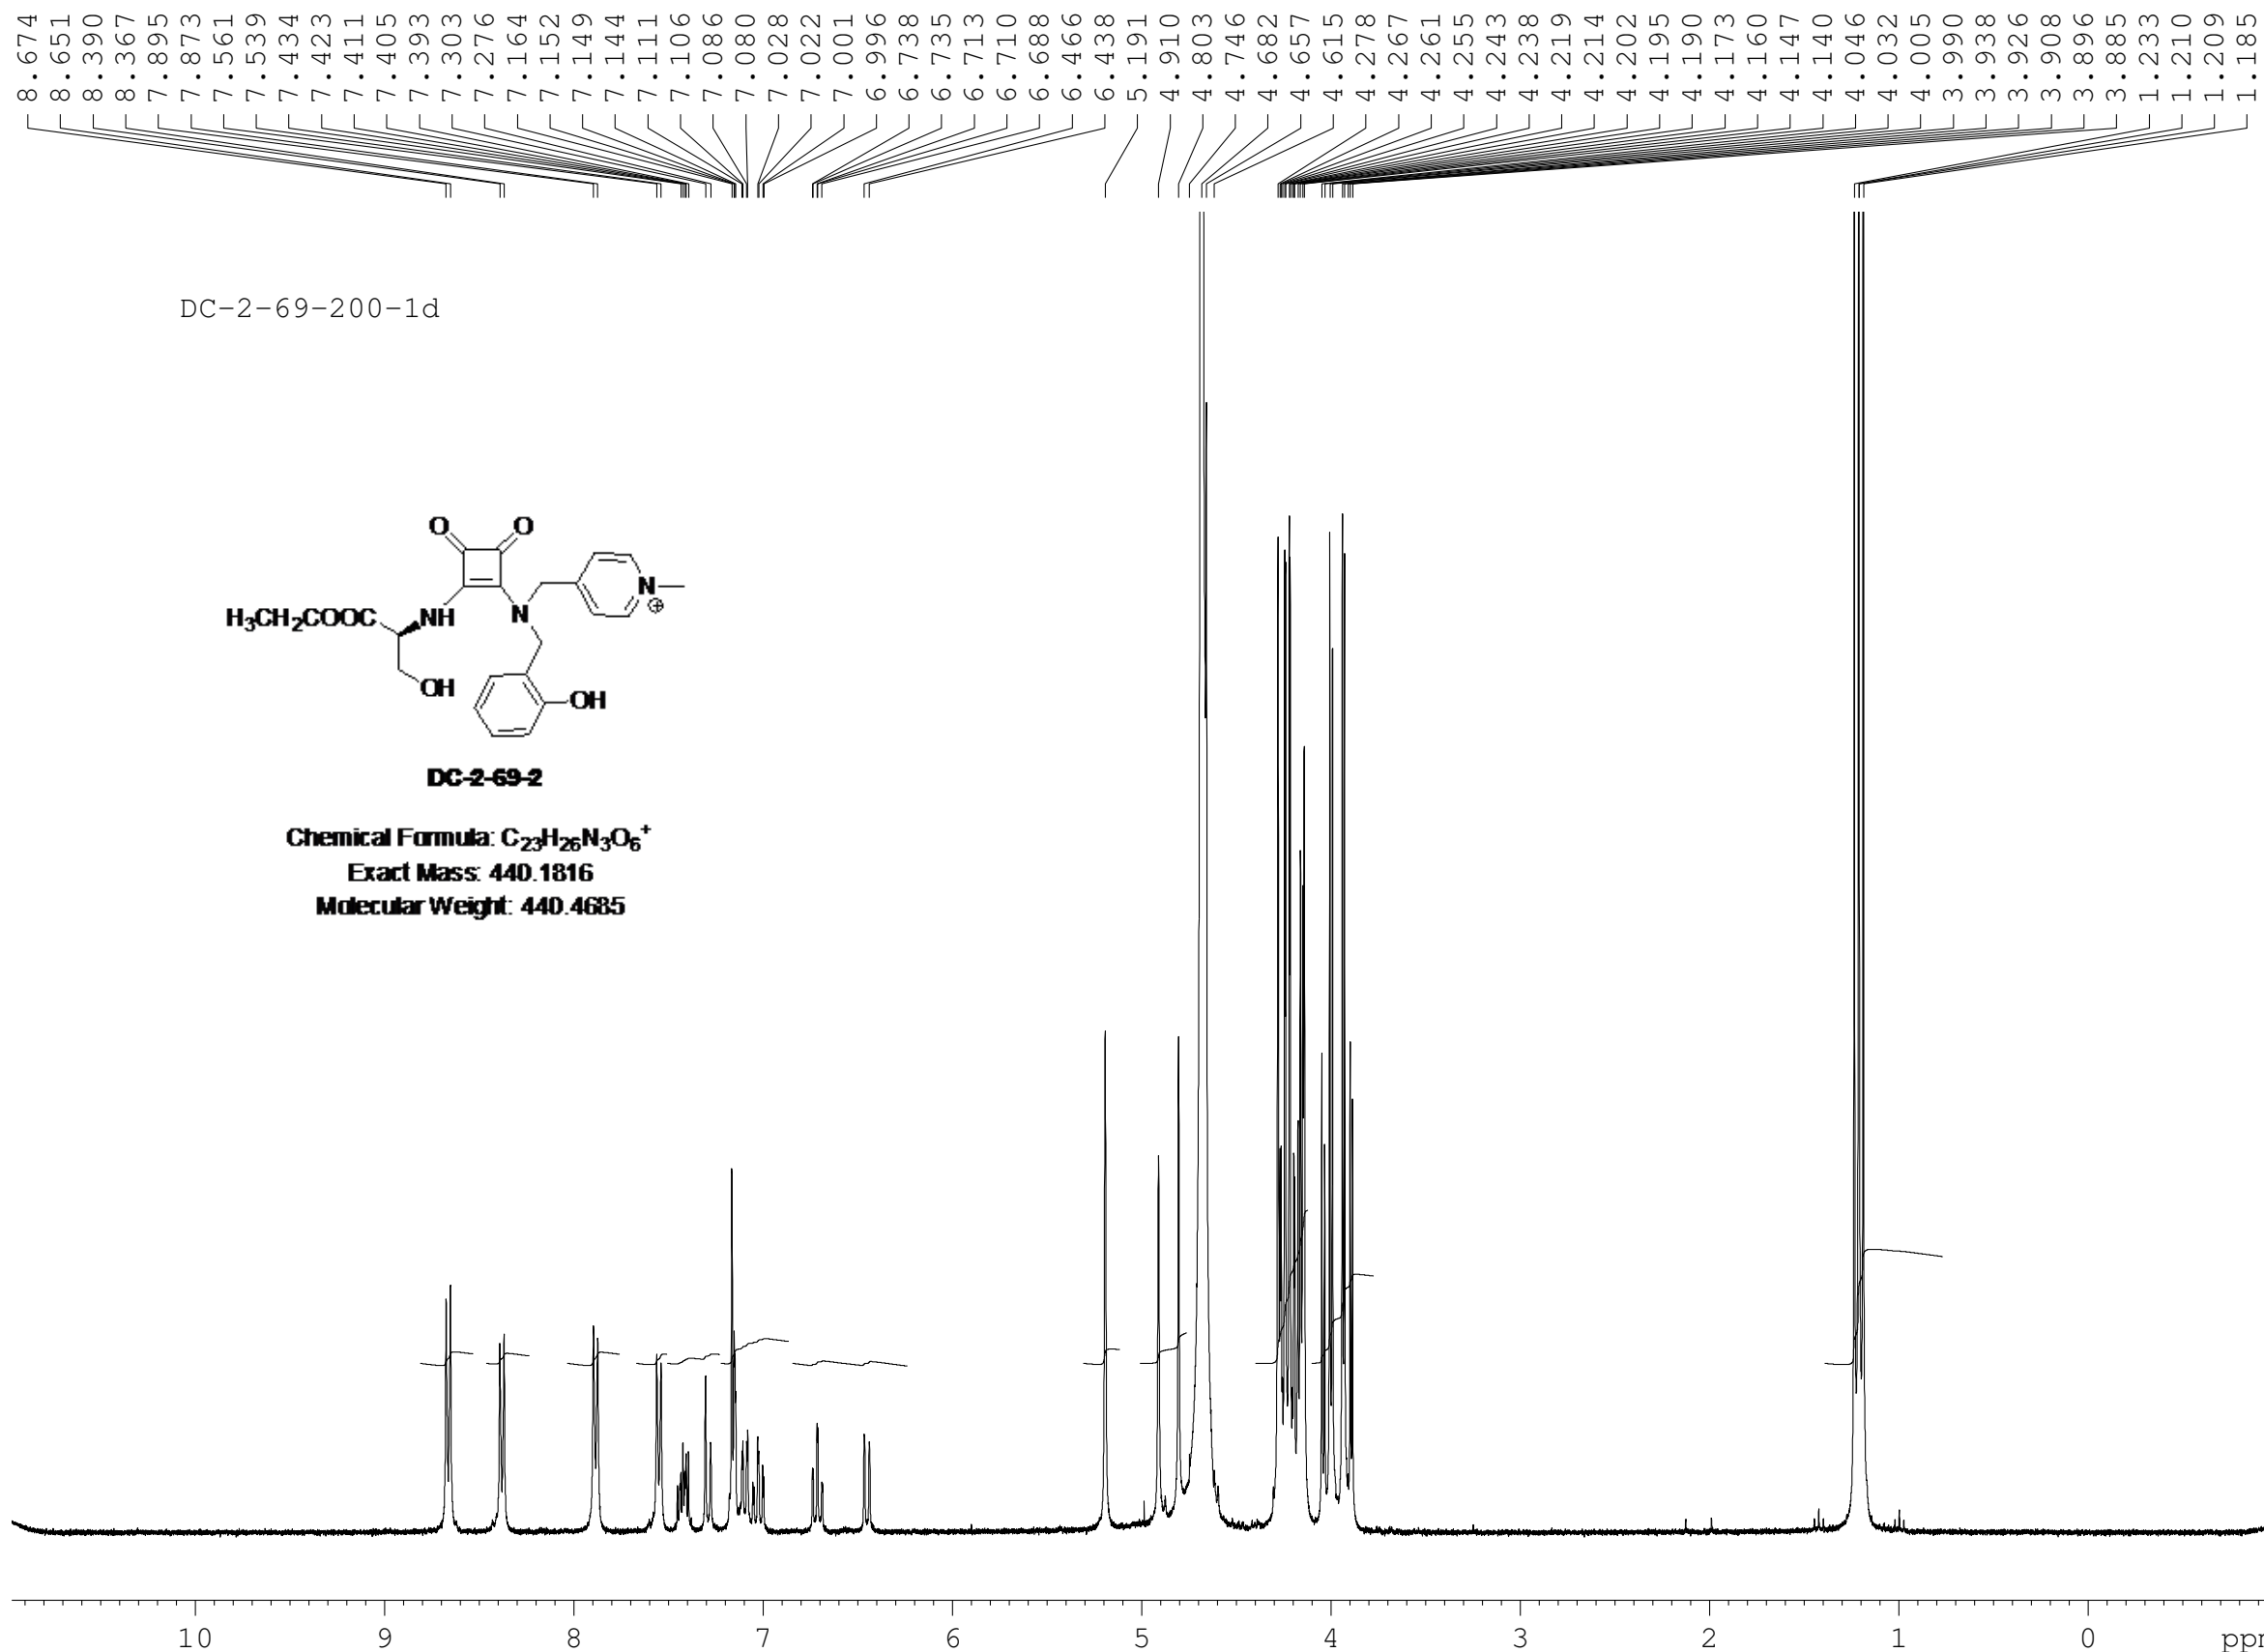

Current Data Parameters  
 NAME DC-2-69-200-1d  
 EXPNO 1  
 PROCNO 1

F2 - Acquisition Parameters  
 Date\_ 20100220  
 Time 10.50  
 INSTRUM spect  
 PROBHD 5 mm QNP 1H/1  
 PULPROG zg  
 TD 32768  
 SOLVENT D2O  
 NS 32  
 DS 0  
 SWH 3591.954 Hz  
 FIDRES 0.109618 Hz  
 AQ 4.5613556 sec  
 RG 362  
 DW 139.200 usec  
 DE 54.00 usec  
 TE 298.2 K  
 D1 1.00000000 sec  
 TD0 1

==== CHANNEL f1 =====  
 NUC1 1H  
 P1 9.75 usec  
 PL1 0.00 dB  
 SFO1 300.1315007 MHz

F2 - Processing parameters  
 SI 32768  
 SF 300.1300042 MHz  
 WDW no  
 SSB 0  
 LB 0.00 Hz  
 GB 0  
 PC 1.00

8.664  
8.642  
8.382  
8.360  
7.887  
7.865  
7.555  
7.533  
7.299  
7.157  
7.142  
7.108  
7.103  
7.083  
7.078  
7.049  
7.043  
7.024  
7.018  
6.997  
6.992  
6.733  
6.708  
6.684  
6.461  
6.434  
5.183  
4.907  
4.805  
4.684  
4.683  
4.648  
4.270  
4.259  
4.254  
4.248  
4.235  
4.230  
4.211  
4.207  
4.194  
4.187  
4.183  
4.165  
4.153  
4.139  
4.132  
4.039  
4.025  
3.997  
3.983  
3.958  
3.930  
3.919  
3.889  
3.877  
1.225  
1.201  
1.178

DC-2-69-200-3d

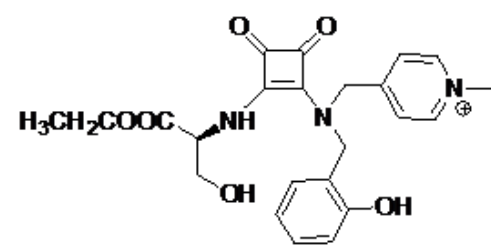

**DC-2-69-2**

**Chemical Formula: C<sub>23</sub>H<sub>26</sub>N<sub>3</sub>O<sub>6</sub><sup>+</sup>**  
**Exact Mass: 440.1816**  
**Molecular Weight: 440.4685**

Current Data Parameters  
 NAME DC-2-69-200-3d  
 EXPNO 1  
 PROCNO 1

F2 - Acquisition Parameters  
 Date\_ 20100222  
 Time 9.21  
 INSTRUM spect  
 PROBHD 5 mm QNP 1H/1  
 PULPROG zg  
 TD 32768  
 SOLVENT D2O  
 NS 32  
 DS 0  
 SWH 3591.954 Hz  
 FIDRES 0.109618 Hz  
 AQ 4.5613556 sec  
 RG 322.5  
 DW 139.200 usec  
 DE 54.00 usec  
 TE 298.2 K  
 D1 1.00000000 sec  
 TD0 1

==== CHANNEL f1 =====  
 NUC1 1H  
 P1 9.75 usec  
 PL1 0.00 dB  
 SFO1 300.1315007 MHz

F2 - Processing parameters  
 SI 32768  
 SF 300.1300042 MHz  
 WDW no  
 SSB 0  
 LB 0.00 Hz  
 GB 0  
 PC 1.00

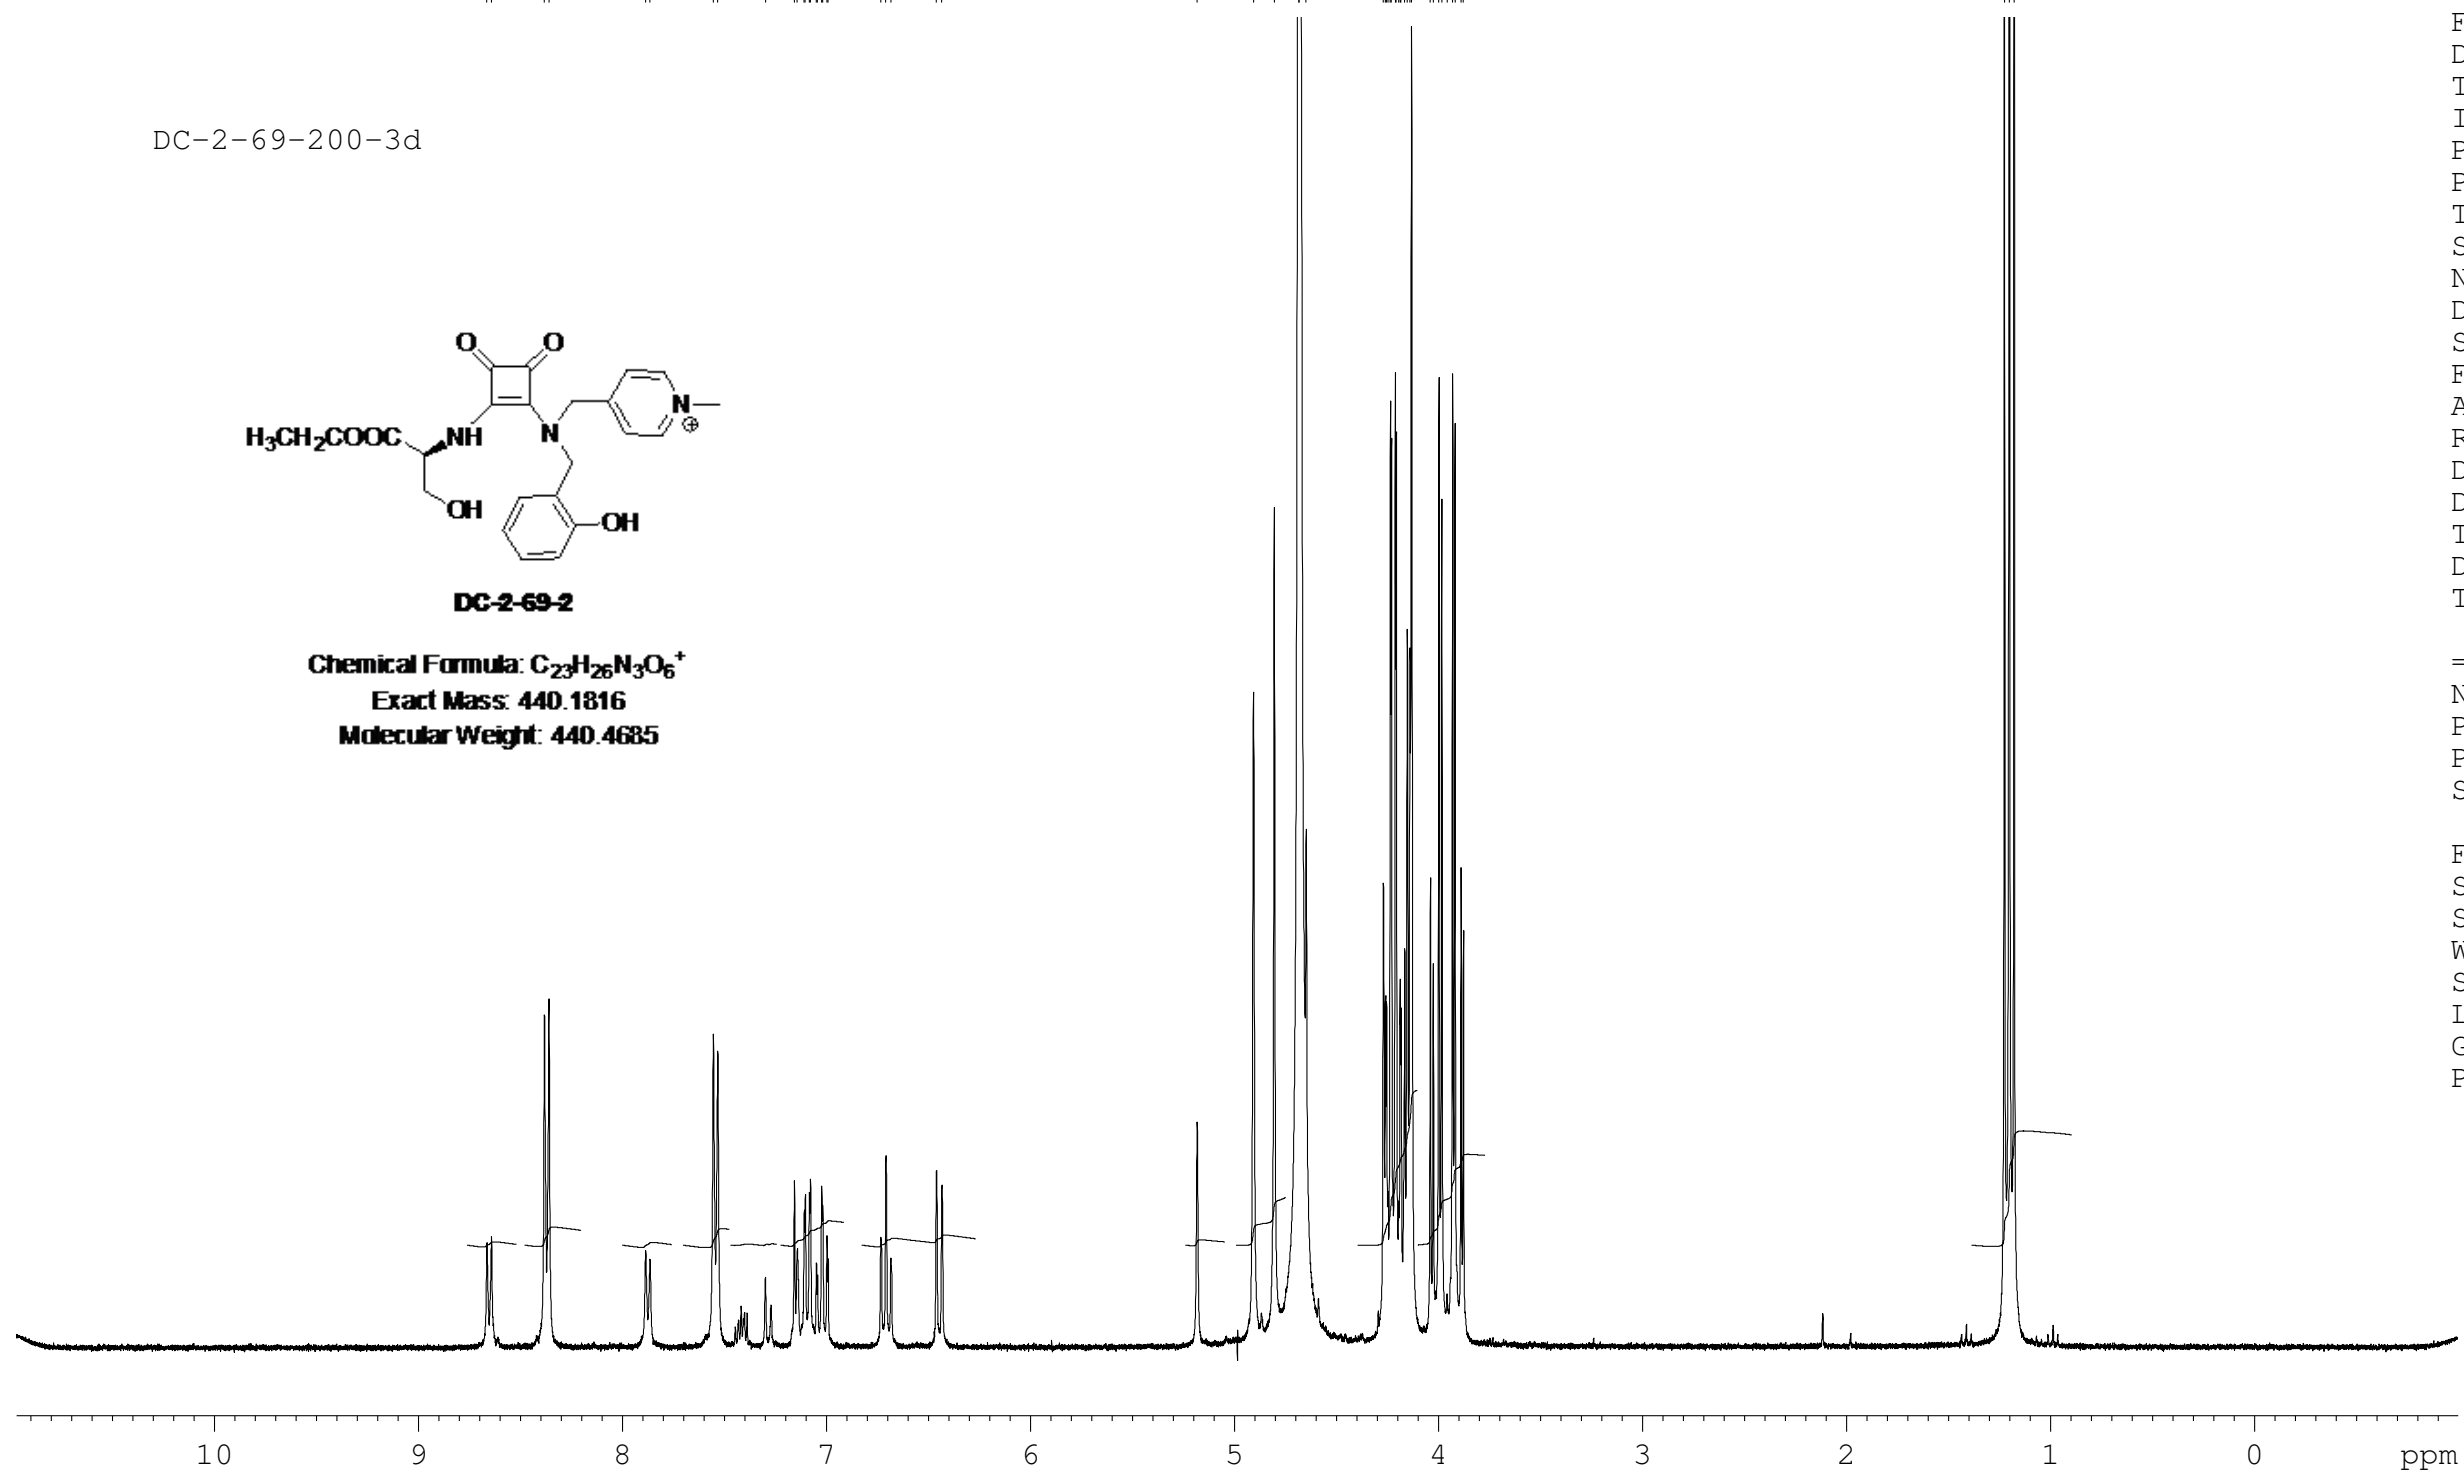

0.076  
1.600  
0.049  
1.714  
0.097  
2.457  
0.683  
0.352  
5.189  
16.760  
9.720  
11.944

8.387  
 8.365  
 7.561  
 7.538  
 7.116  
 7.111  
 7.091  
 7.086  
 7.057  
 7.051  
 7.032  
 7.026  
 7.005  
 7.000  
 6.741  
 6.738  
 6.716  
 6.713  
 6.691  
 6.688  
 6.471  
 6.467  
 6.444  
 6.440  
 5.186  
 4.914  
 4.815  
 4.753  
 4.683  
 4.276  
 4.264  
 4.259  
 4.252  
 4.240  
 4.236  
 4.216  
 4.212  
 4.200  
 4.192  
 4.188  
 4.170  
 4.158  
 4.144  
 4.137  
 4.044  
 4.030  
 4.003  
 3.988  
 3.936  
 3.924  
 3.894  
 3.883  
 2.122  
 1.231  
 1.207  
 1.183

DC-2-69-200-6d



**DC-2-69-2**

**Chemical Formula: C<sub>23</sub>H<sub>26</sub>N<sub>3</sub>O<sub>6</sub><sup>+</sup>**

**Exact Mass: 440.1816**

**Molecular Weight: 440.4685**

Current Data Parameters  
 NAME DC-2-69-200-6d  
 EXPNO 1  
 PROCNO 1

F2 - Acquisition Parameters  
 Date\_ 20100225  
 Time 10.42  
 INSTRUM spect  
 PROBHD 5 mm QNP 1H/1  
 PULPROG zg  
 TD 32768  
 SOLVENT D2O  
 NS 32  
 DS 0  
 SWH 3591.954 Hz  
 FIDRES 0.109618 Hz  
 AQ 4.5613556 sec  
 RG 406.4  
 DW 139.200 usec  
 DE 54.00 usec  
 TE 298.2 K  
 D1 1.00000000 sec  
 TD0 1

==== CHANNEL f1 =====  
 NUC1 1H  
 P1 9.75 usec  
 PL1 0.00 dB  
 SFO1 300.1315007 MHz

F2 - Processing parameters  
 SI 32768  
 SF 300.1300042 MHz  
 WDW no  
 SSB 0  
 LB 0.00 Hz  
 GB 0  
 PC 1.00

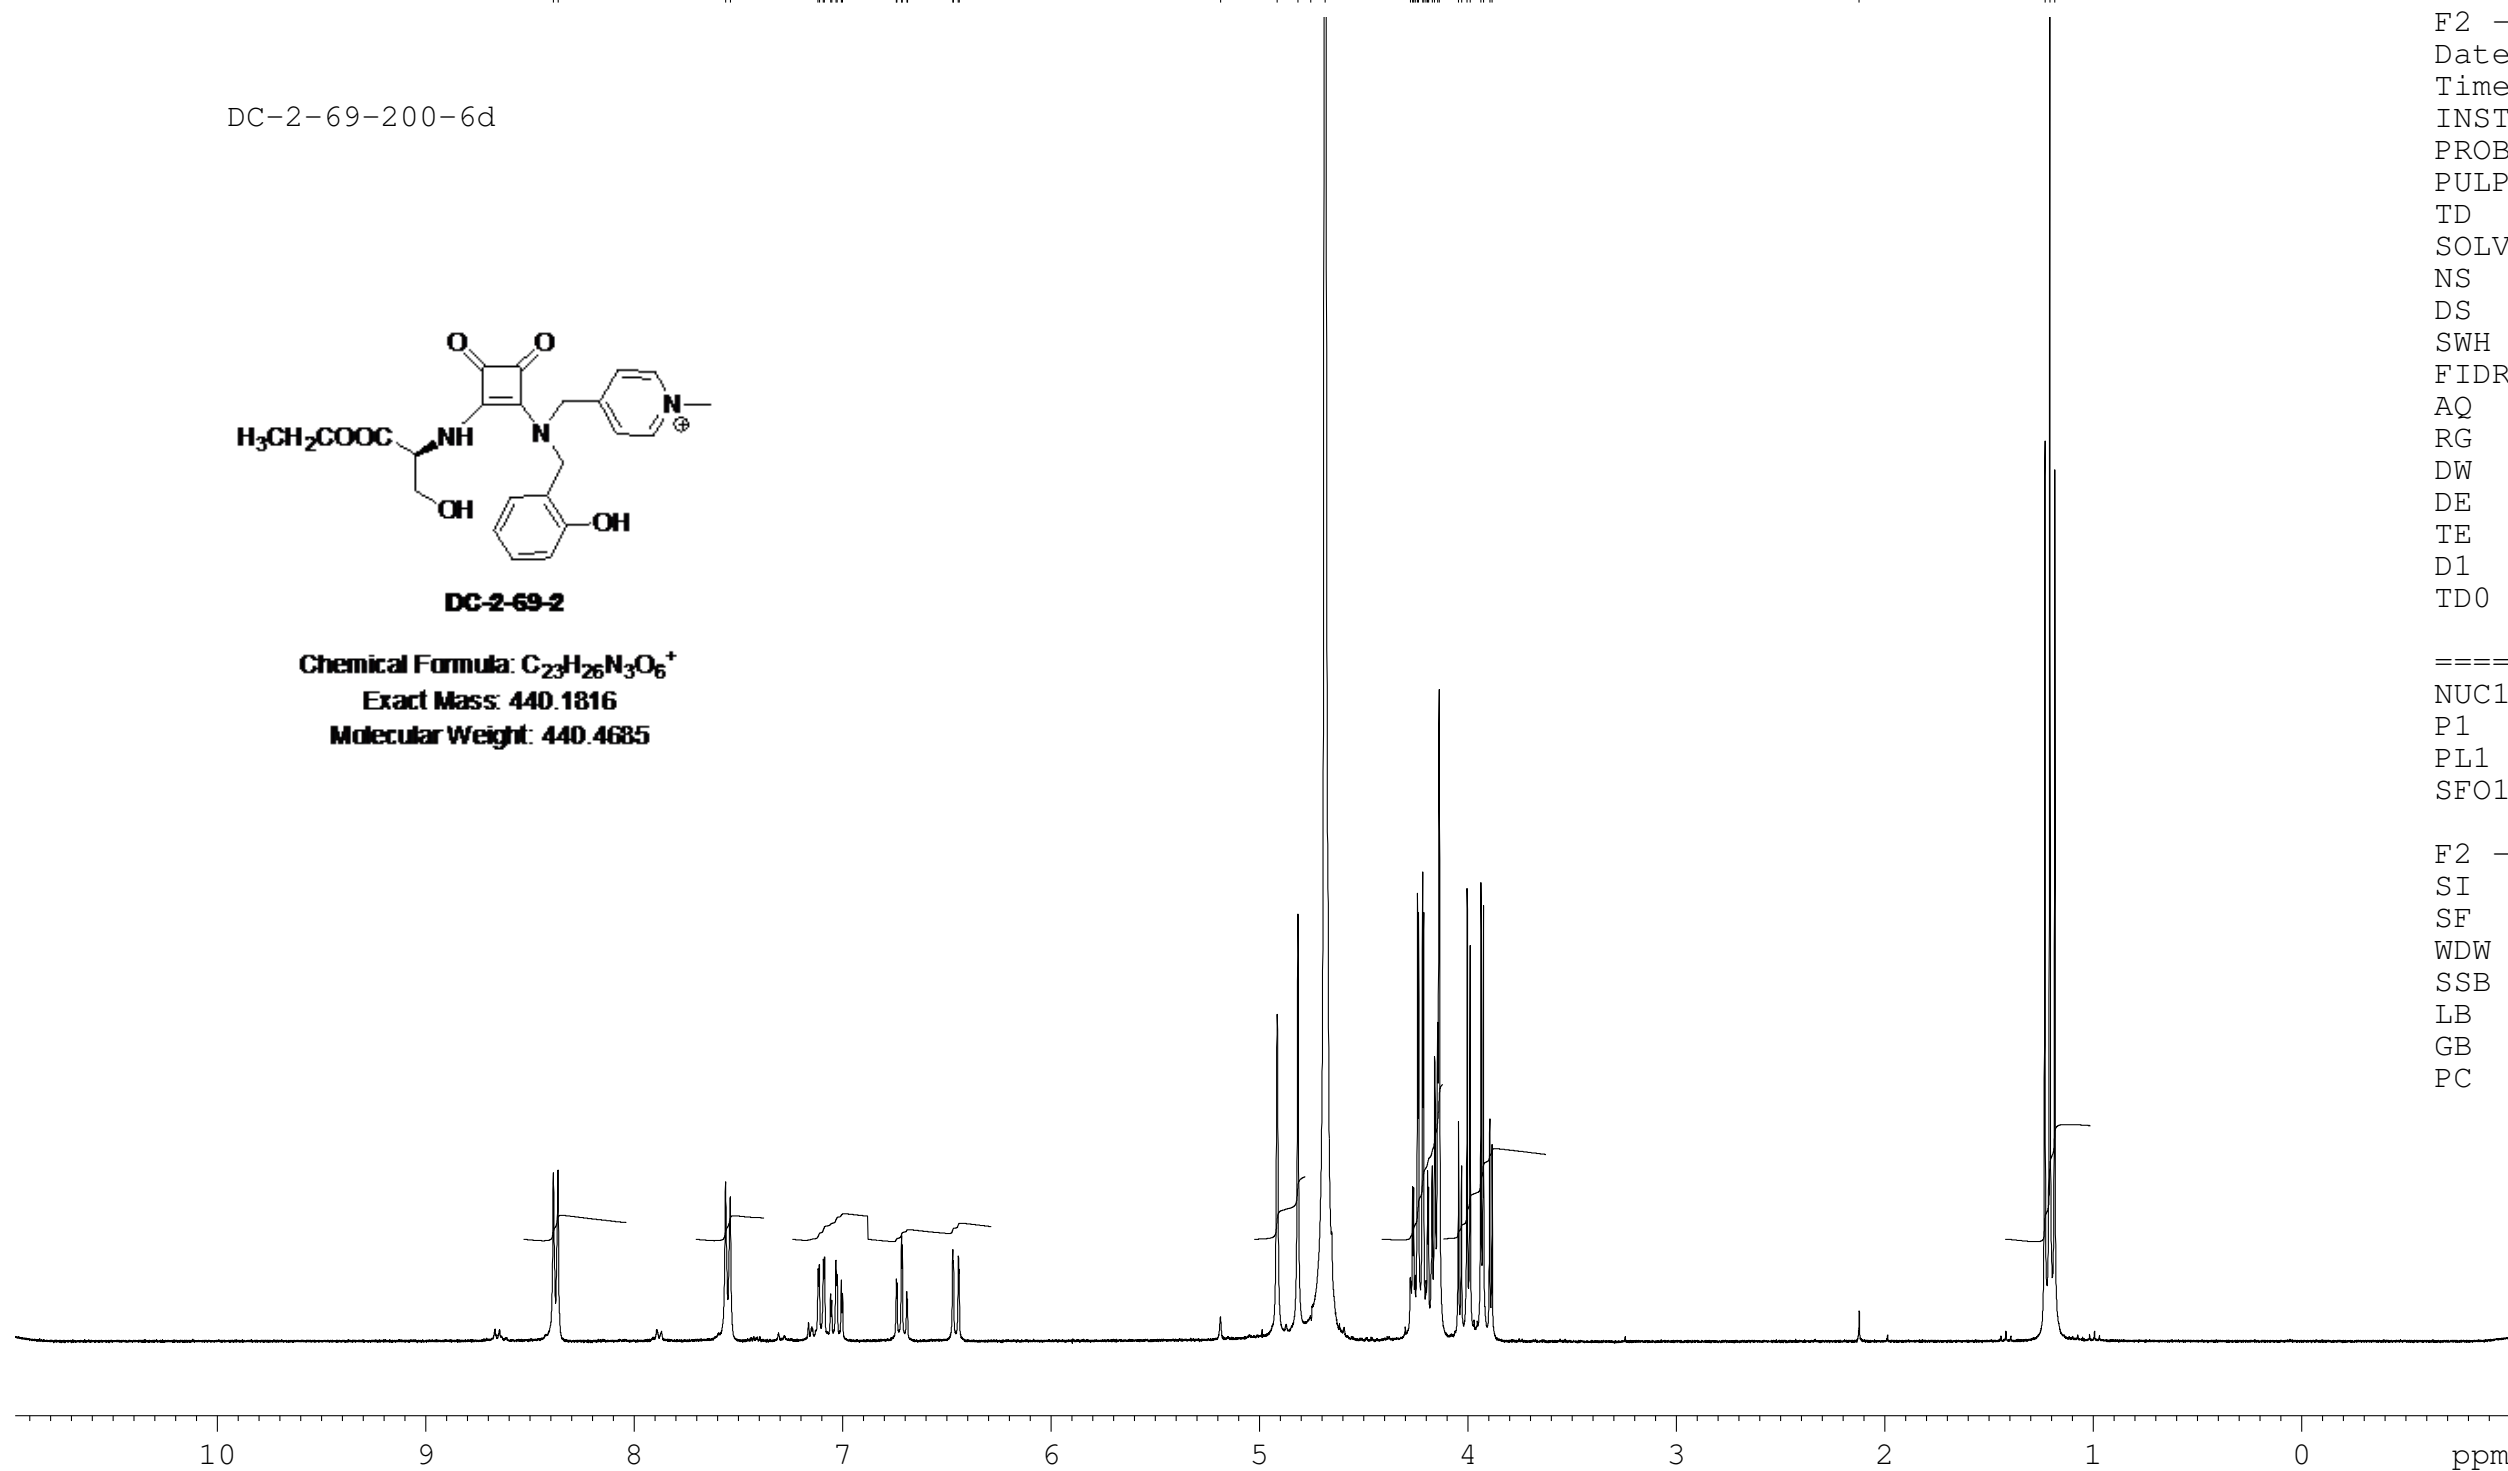

2.000  
 2.539  
 2.646  
 1.515  
 7.524  
 18.566  
 10.167  
 13.635

# Elemental Composition Report

Tolerance = 5.0 PPM / DBE: min = -1.5, max = 80.0  
 Selected filters: None

Monoisotopic Mass, Even Electron Ions

23 formula(e) evaluated with 1 results within limits (all results (up to 1000) for each mass)

Elements Used:

C: 0-23 H: 0-26 N: 0-3 O: 0-6

File name: dc-2-69-200

Instrument: LCT KC366

Method: ESI-TOF

dc-2-69-200 44 (1.102) AM (Cen,8, 90.00, Ar,4000.0,1222.14,0.70,LS 6); Sm (SG, 2x4.00); Cm (44:49)

Notebook Ref: 24825

Test name: Accurate Mass

Base Peak Mass: 440.1839048

IU Database#: 24825

06-May-2010 11:51:31

1: TOF MS ES+  
 5.48e3

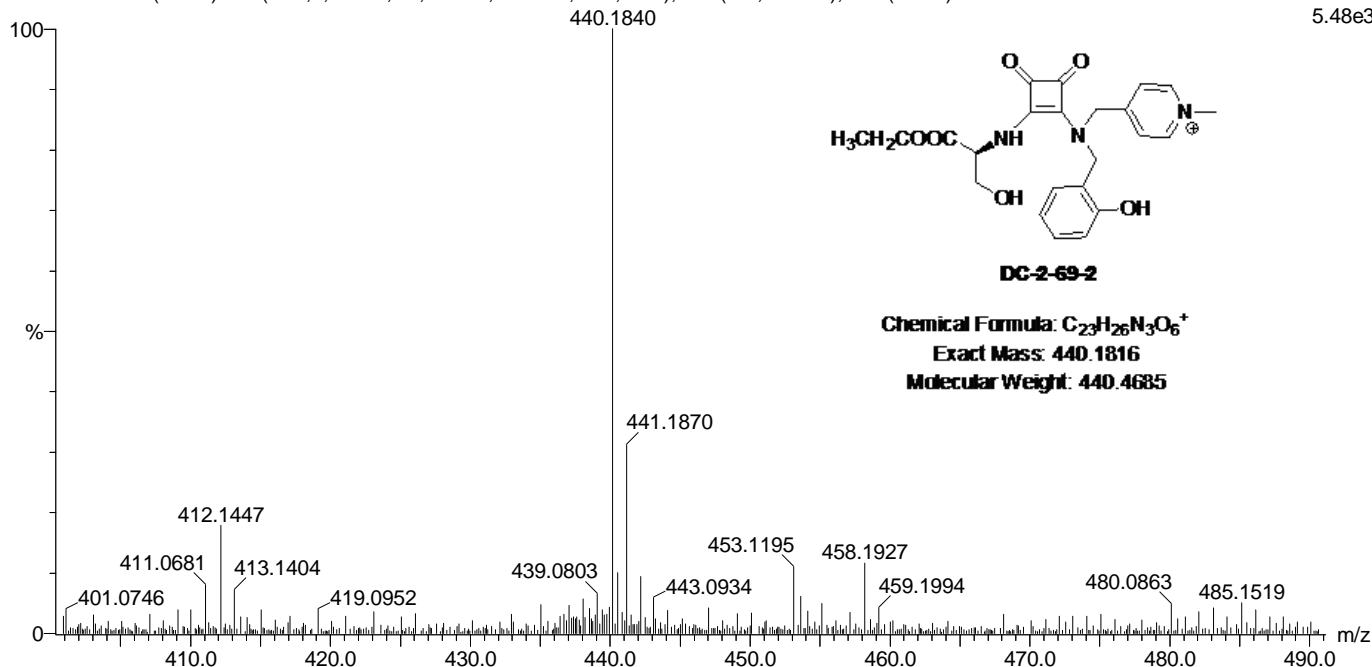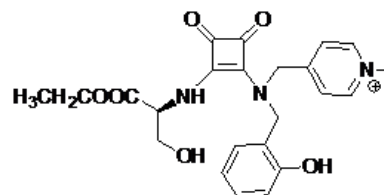

**DC-2-69-2**

**Chemical Formula: C<sub>23</sub>H<sub>26</sub>N<sub>3</sub>O<sub>6</sub><sup>+</sup>**

**Exact Mass: 440.1816**

**Molecular Weight: 440.4685**

| Mass     | RA     | Calc. Mass | mDa | PPM | DBE  | i-FIT | Formula                                                       |
|----------|--------|------------|-----|-----|------|-------|---------------------------------------------------------------|
| 440.1840 | 100.00 | 440.1822   | 1.8 | 4.1 | 12.5 | 66.5  | C <sub>23</sub> H <sub>26</sub> N <sub>3</sub> O <sub>6</sub> |

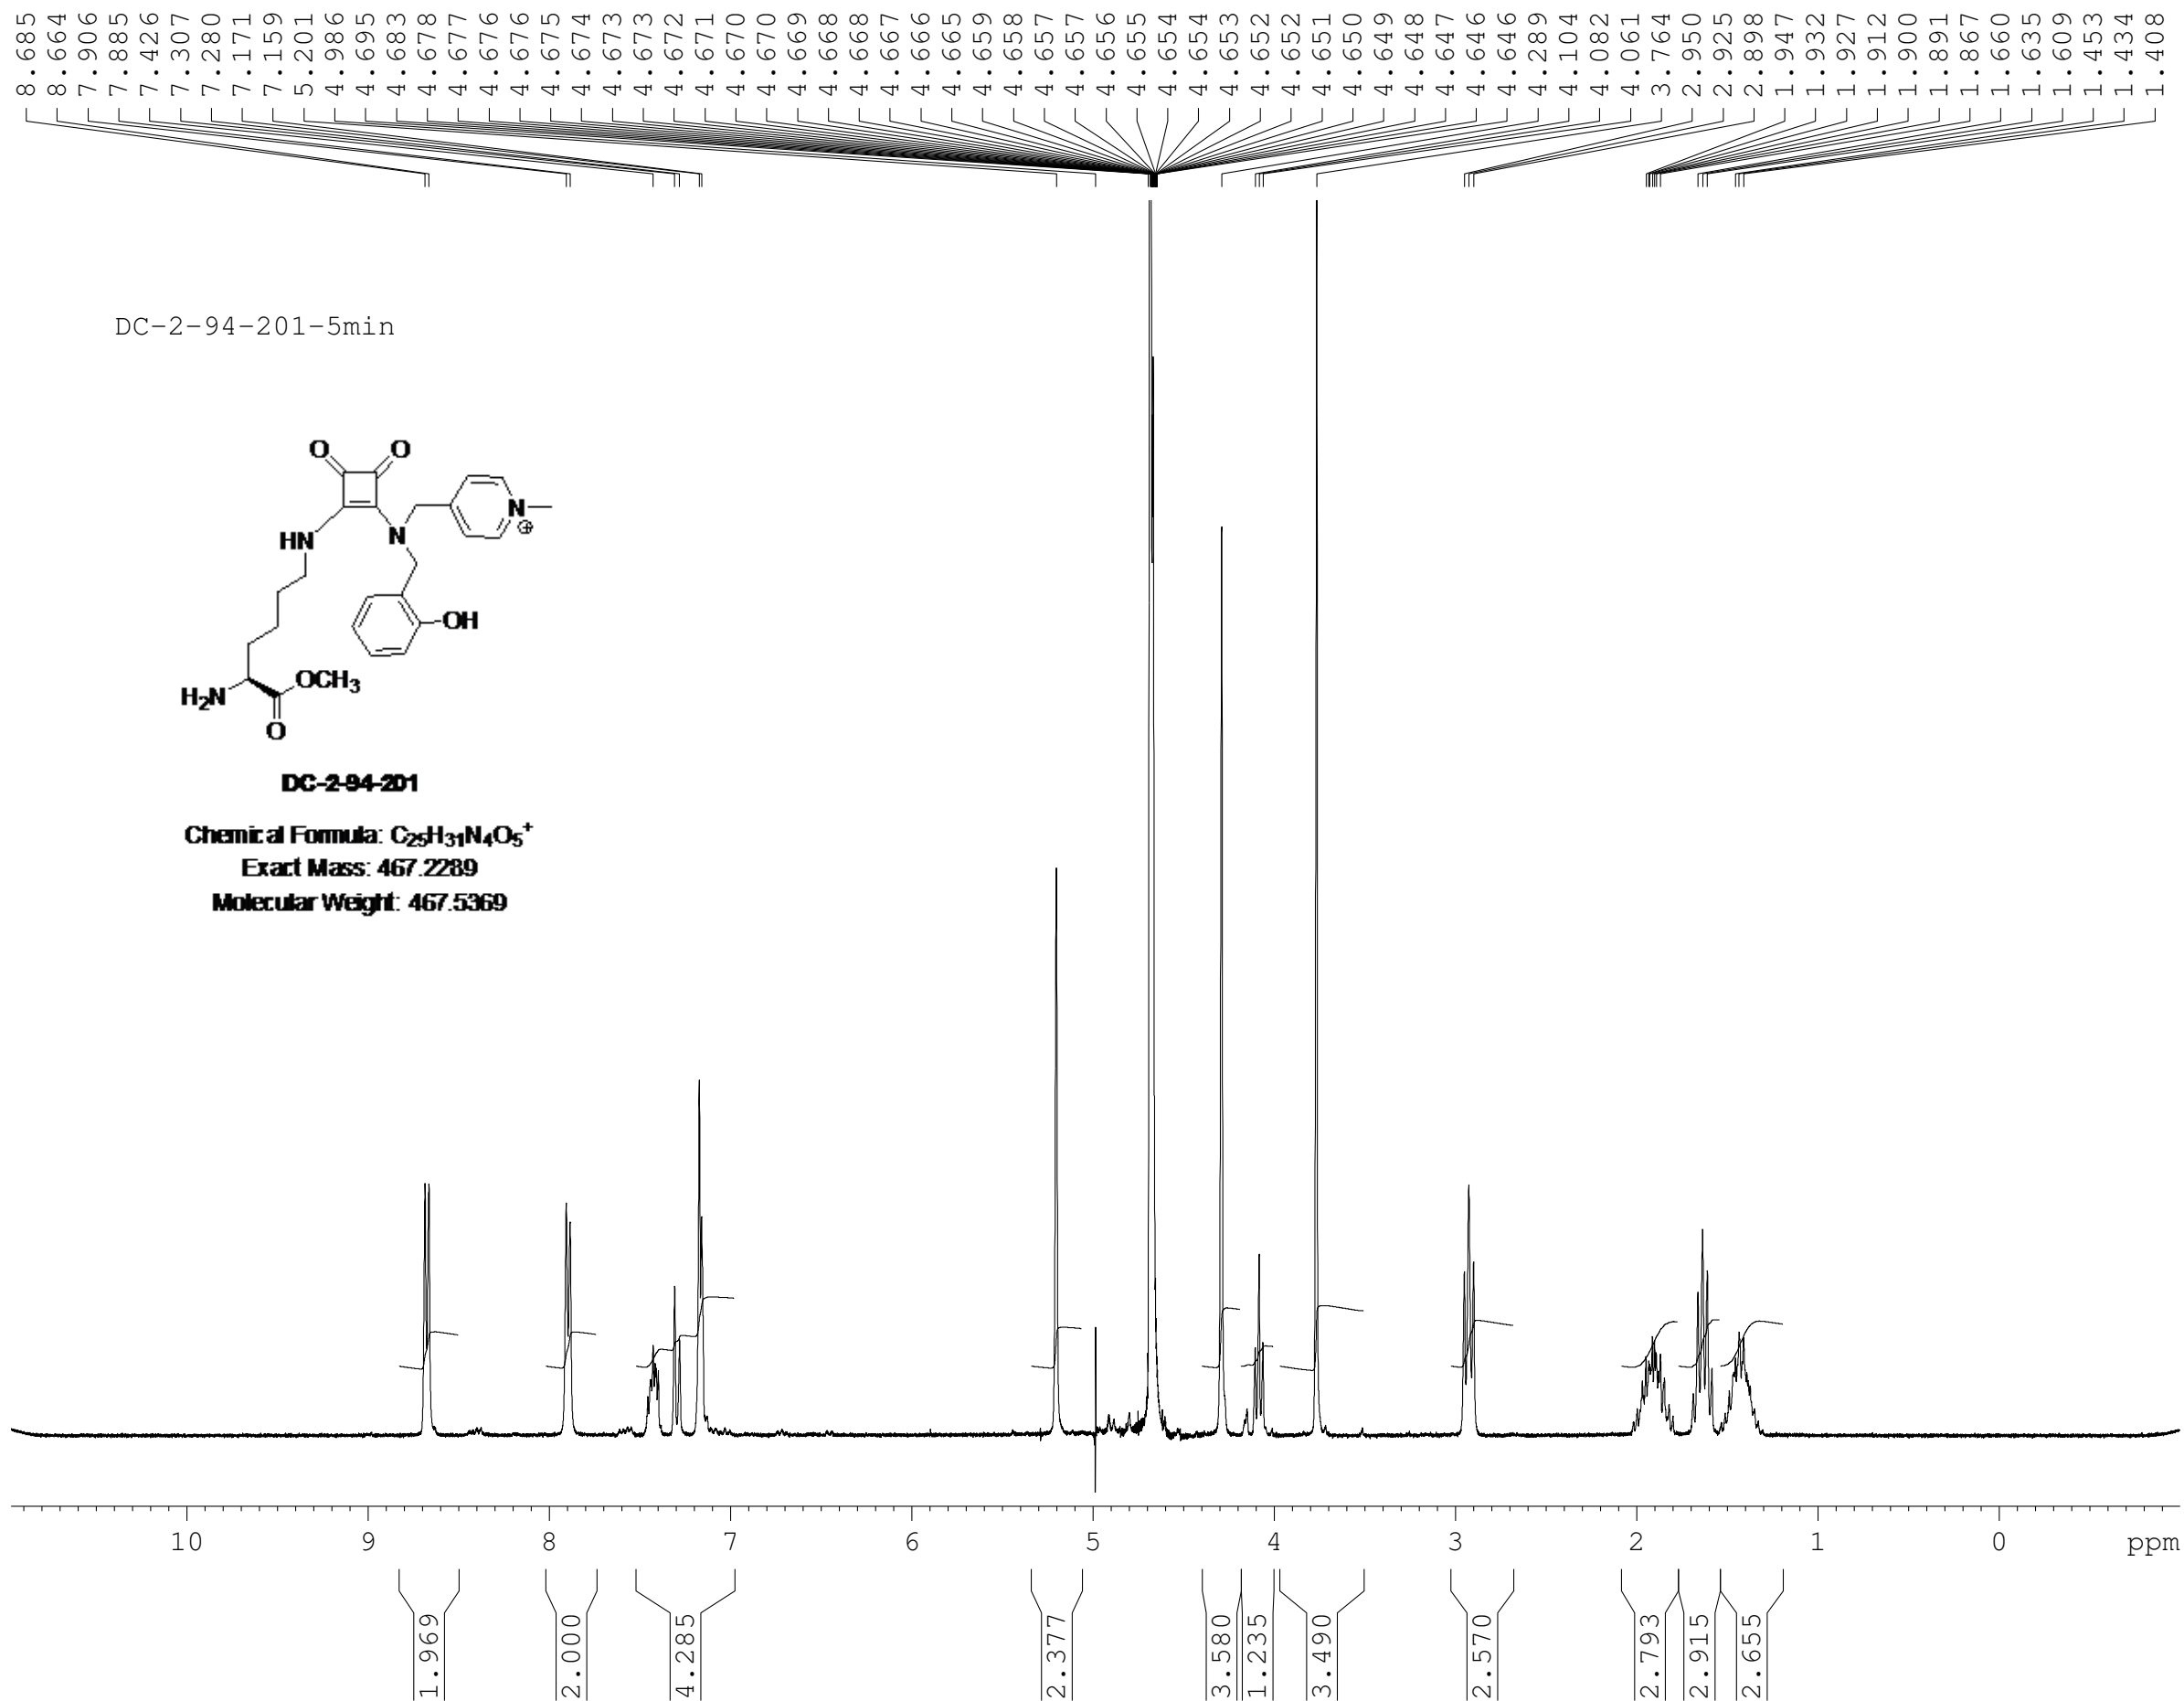

Current Data Parameters  
 NAME DC-2-94-201-5min  
 EXPNO 1  
 PROCNO 1

F2 - Acquisition Parameters  
 Date\_ 20100226  
 Time 16.13  
 INSTRUM spect  
 PROBHD 5 mm QNP 1H/1  
 PULPROG zg  
 TD 32768  
 SOLVENT D2O  
 NS 32  
 DS 0  
 SWH 3591.954 Hz  
 FIDRES 0.109618 Hz  
 AQ 4.5613556 sec  
 RG 256  
 DW 139.200 usec  
 DE 54.00 usec  
 TE 299.2 K  
 D1 1.00000000 sec  
 TD0 1

==== CHANNEL f1 =====  
 NUC1 1H  
 P1 9.75 usec  
 PL1 0.00 dB  
 SFO1 300.1315007 MHz

F2 - Processing parameters  
 SI 32768  
 SF 300.1300042 MHz  
 WDW no  
 SSB 0  
 LB 0.00 Hz  
 GB 0  
 PC 1.00

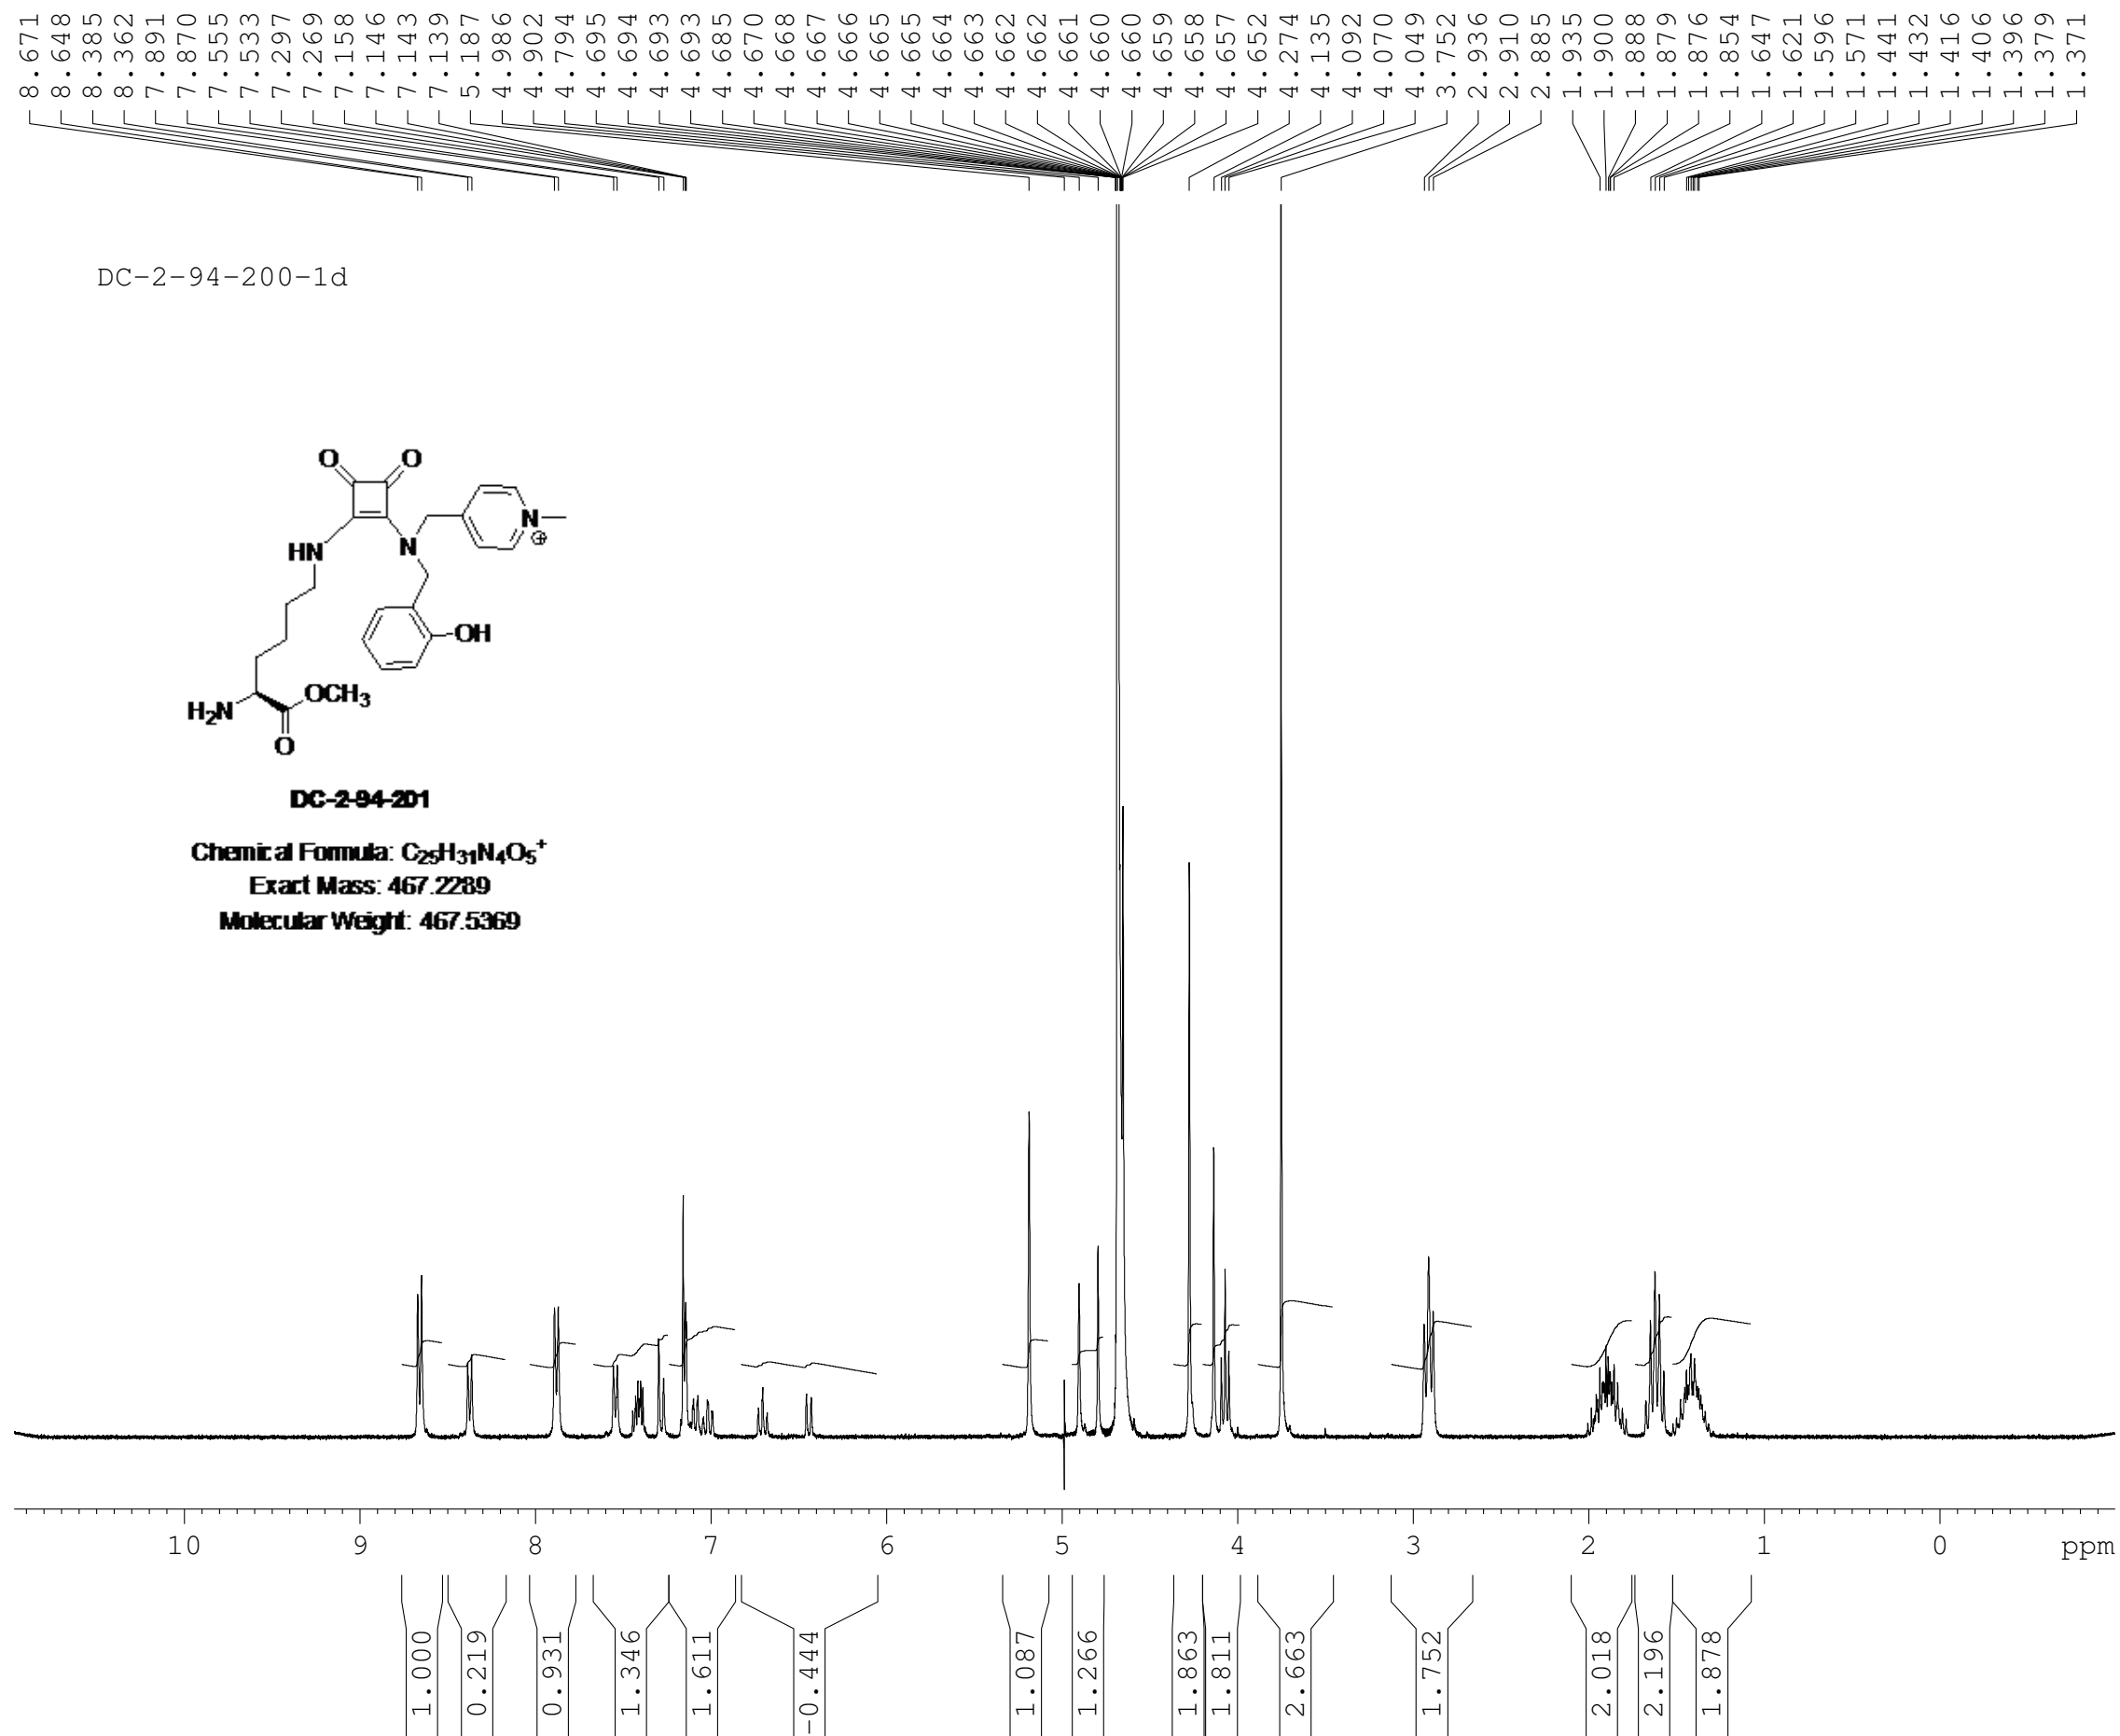

Current Data Parameters  
 NAME DC-2-94-201-1d  
 EXPNO 1  
 PROCNO 1

F2 - Acquisition Parameters  
 Date\_ 20100227  
 Time 11.41  
 INSTRUM spect  
 PROBHD 5 mm QNP 1H/1  
 PULPROG zg  
 TD 32768  
 SOLVENT D2O  
 NS 16  
 DS 0  
 SWH 3591.954 Hz  
 FIDRES 0.109618 Hz  
 AQ 4.5613556 sec  
 RG 512  
 DW 139.200 usec  
 DE 54.00 usec  
 TE 298.2 K  
 D1 1.00000000 sec  
 TD0 1

==== CHANNEL f1 =====  
 NUC1 1H  
 P1 9.75 usec  
 PL1 0.00 dB  
 SFO1 300.1315007 MHz

F2 - Processing parameters  
 SI 32768  
 SF 300.1300042 MHz  
 WDW no  
 SSB 0  
 LB 0.00 Hz  
 GB 0  
 PC 1.00



8.391  
 8.368  
 7.563  
 7.541  
 7.086  
 6.719  
 6.715  
 6.469  
 5.190  
 4.986  
 4.915  
 4.813  
 4.692  
 4.691  
 4.690  
 4.689  
 4.689  
 4.685  
 4.683  
 4.672  
 4.671  
 4.670  
 4.670  
 4.669  
 4.668  
 4.668  
 4.667  
 4.666  
 4.665  
 4.665  
 4.664  
 4.663  
 4.662  
 4.662  
 4.661  
 4.660  
 4.659  
 4.659  
 4.658  
 4.657  
 4.657  
 4.656  
 4.655  
 4.654  
 4.652  
 4.652  
 4.651  
 4.650  
 4.649  
 4.649  
 4.648  
 4.647  
 4.646  
 4.646  
 4.644  
 4.643  
 4.277  
 4.141  
 4.097  
 4.076  
 4.054  
 3.758  
 2.942  
 2.917  
 2.891  
 1.906  
 1.894  
 1.653  
 1.627  
 1.602  
 1.422

Current Data Parameters  
 NAME DC-2-94-201-3d  
 EXPNO 1  
 PROCNO 1

F2 - Acquisition Parameters  
 Date\_ 20100301  
 Time 18.32  
 INSTRUM spect  
 PROBHD 5 mm QNP 1H/1  
 PULPROG zg  
 TD 32768  
 SOLVENT D2O  
 NS 16  
 DS 0  
 SWH 3591.954 Hz  
 FIDRES 0.109618 Hz  
 AQ 4.5613556 sec  
 RG 456.1  
 DW 139.200 usec  
 DE 54.00 usec  
 TE 299.2 K  
 D1 1.0000000 sec  
 TD0 1

==== CHANNEL f1 =====  
 NUC1 1H  
 P1 9.75 usec  
 PL1 0.00 dB  
 SFO1 300.1315007 MHz

F2 - Processing parameters  
 SI 32768  
 SF 300.1300042 MHz  
 WDW no  
 SSB 0  
 LB 0.00 Hz  
 GB 0  
 PC 1.00

DC-2-94-201-3d

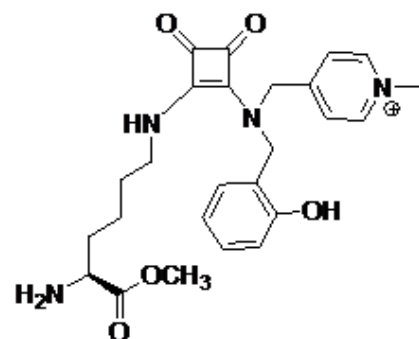

**DC-2-94-201**

**Chemical Formula: C<sub>25</sub>H<sub>31</sub>N<sub>4</sub>O<sub>5</sub><sup>+</sup>**

**Exact Mass: 467.2289**

**Molecular Weight: 467.5369**

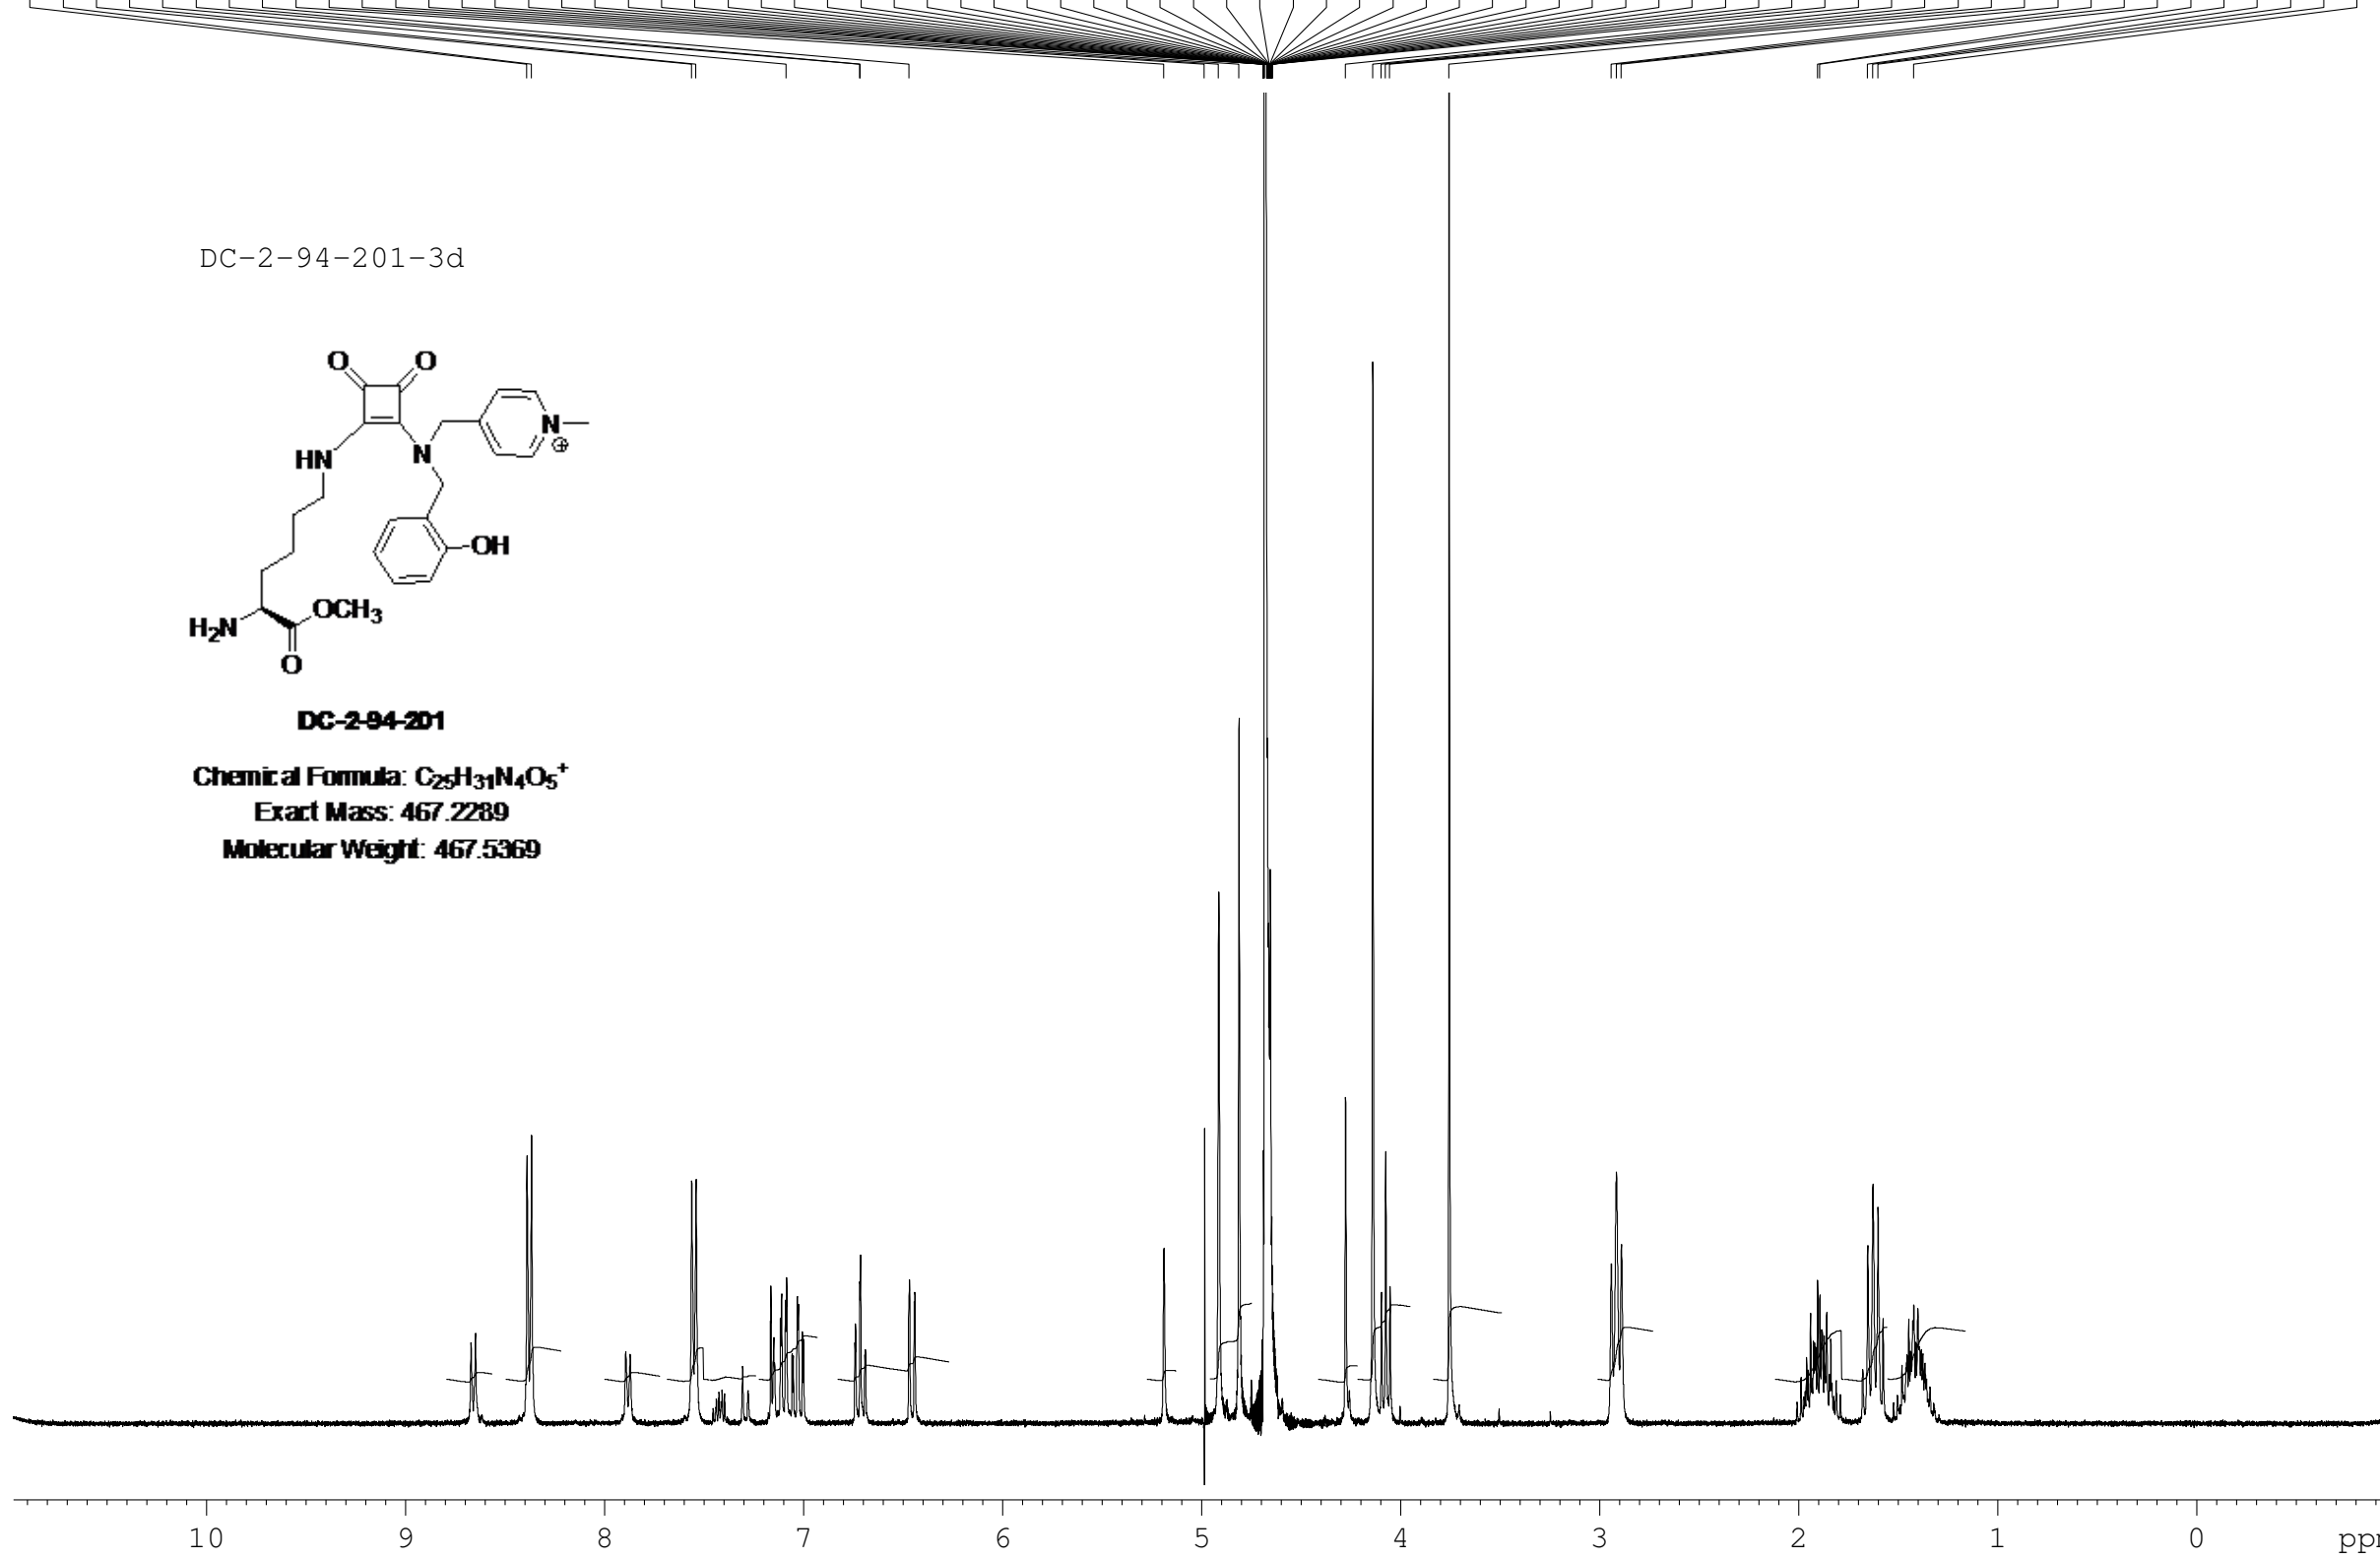

0.213  
 1.172  
 0.121  
 1.260  
 0.129  
 1.736  
 0.717  
 0.344  
 3.172  
 0.546  
 3.025  
 2.764  
 1.999  
 2.022  
 2.172  
 2.000

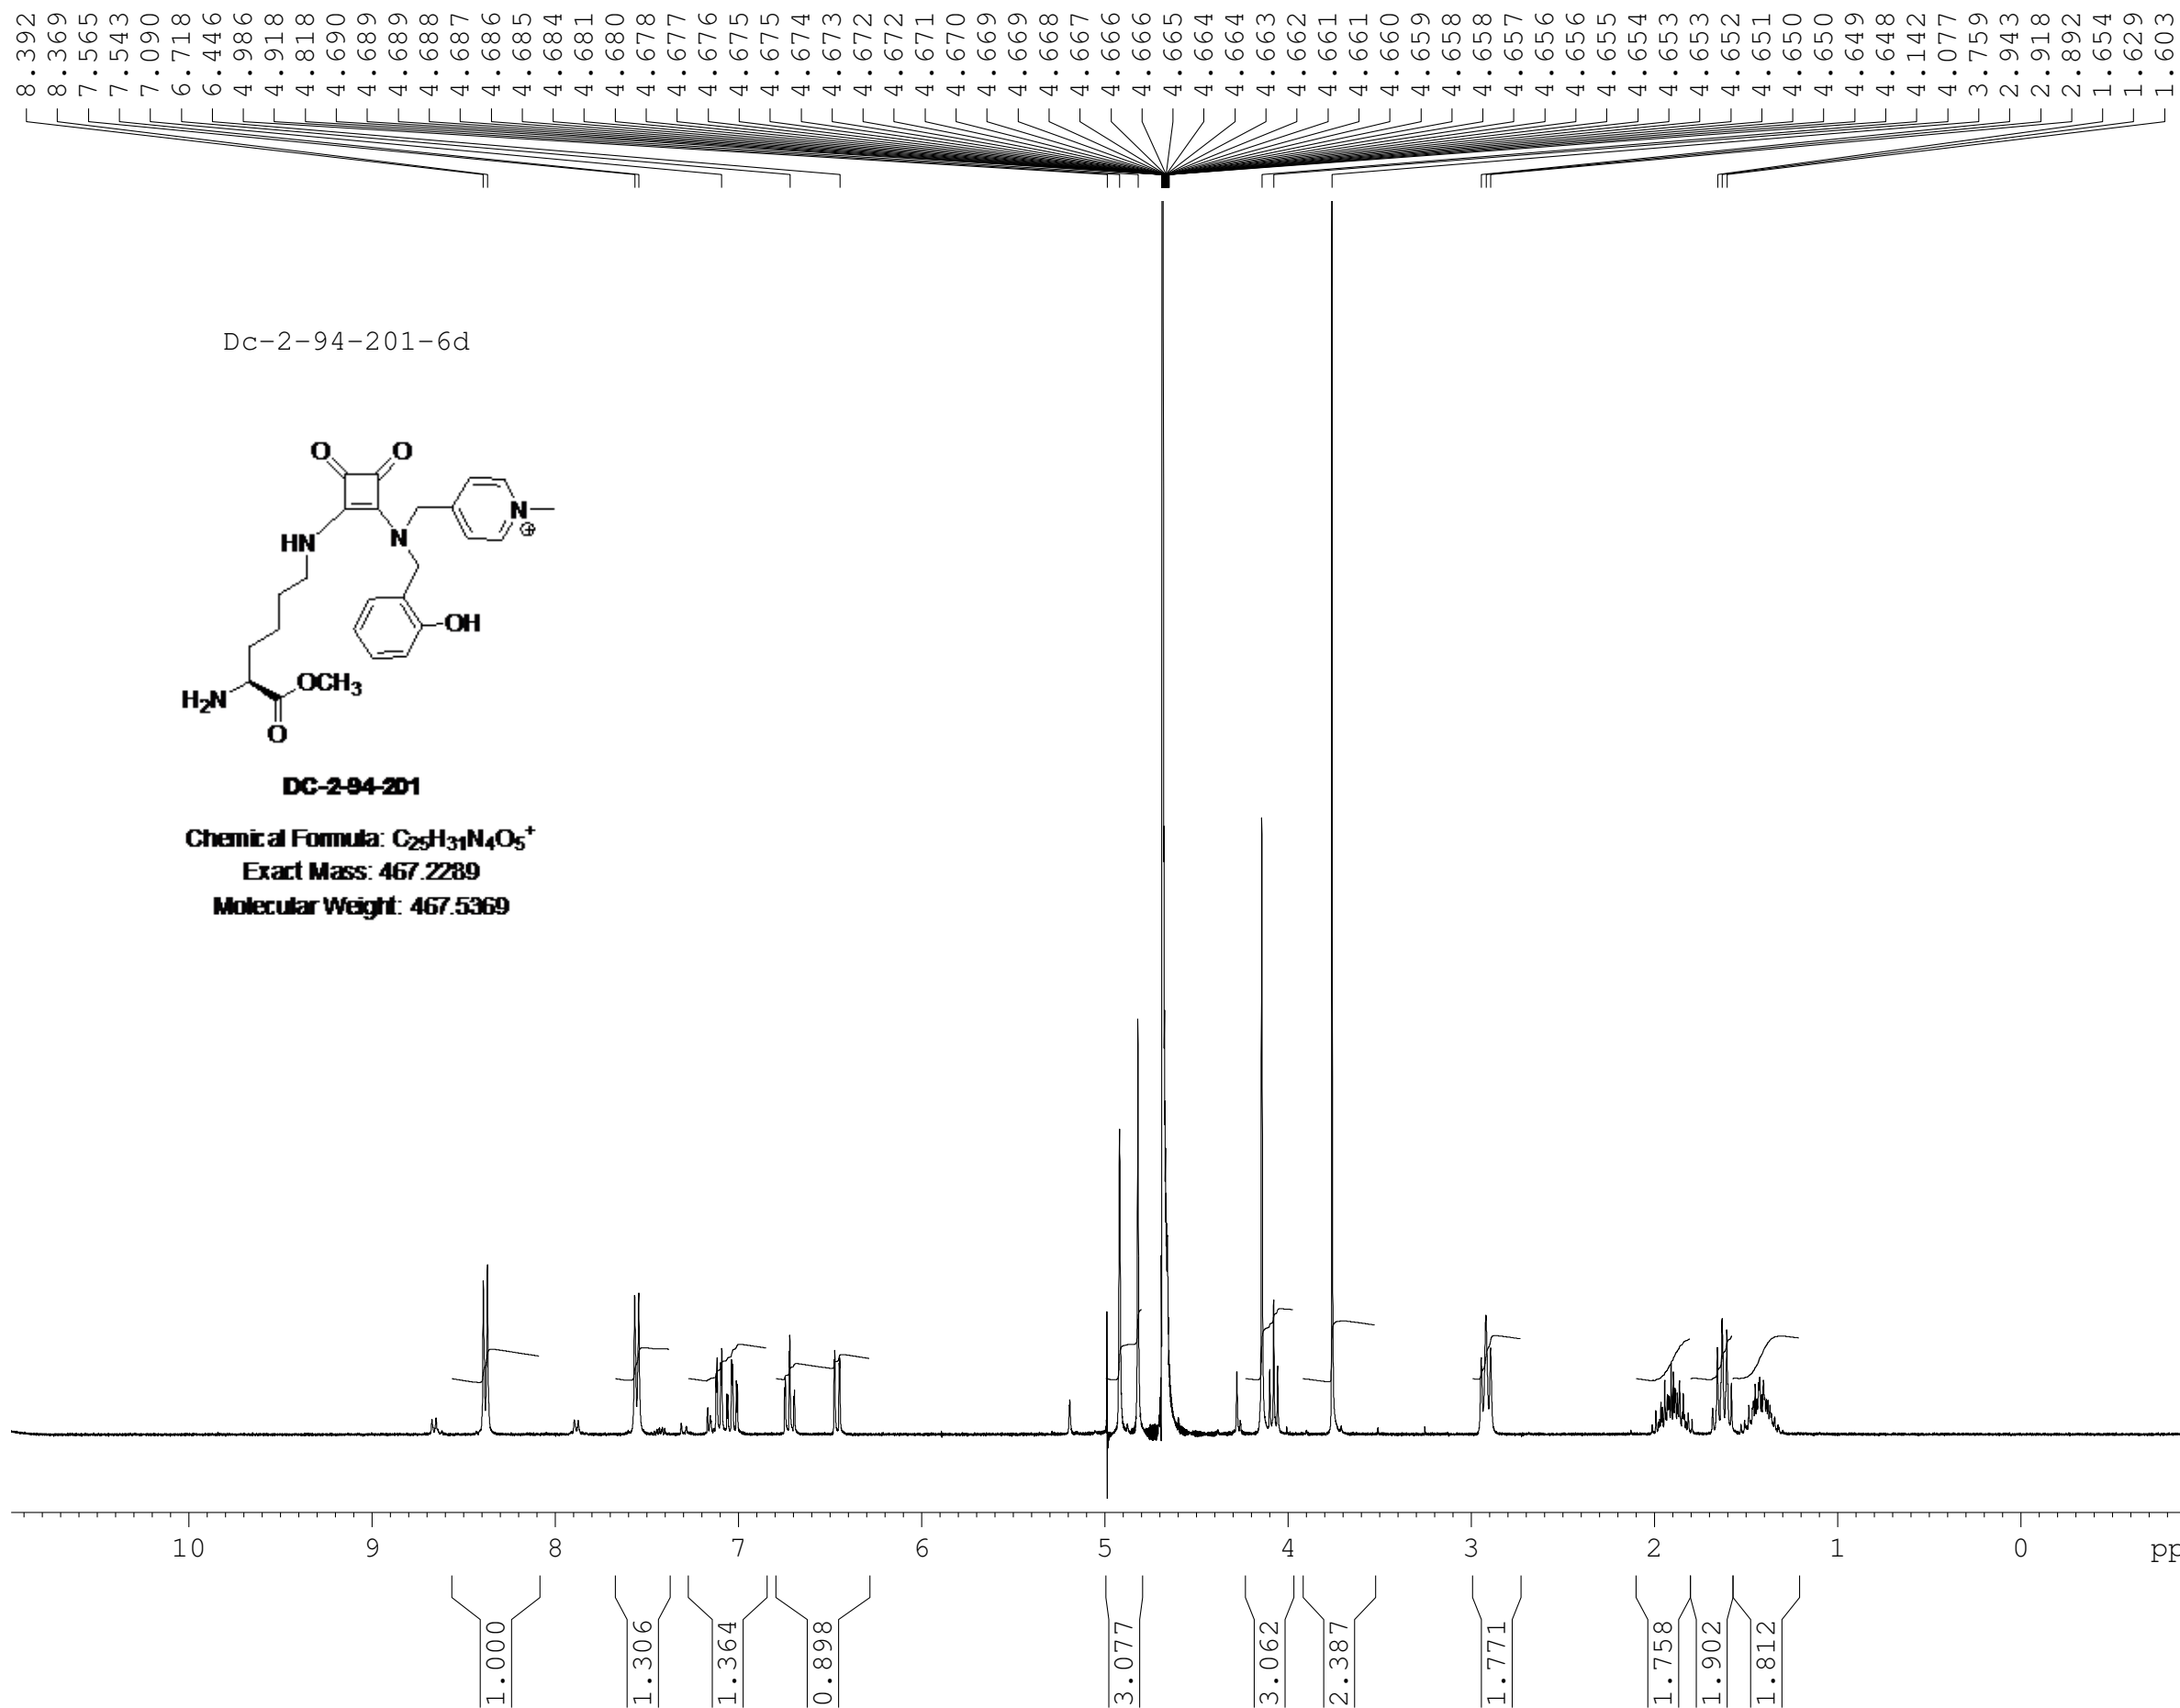

Current Data Parameters  
 NAME Dc-2-94-201-6d  
 EXPNO 1  
 PROCNO 1

F2 - Acquisition Parameters  
 Date\_ 20100303  
 Time 18.31  
 INSTRUM spect  
 PROBHD 5 mm QNP 1H/1  
 PULPROG zg  
 TD 32768  
 SOLVENT D2O  
 NS 16  
 DS 0  
 SWH 3591.954 Hz  
 FIDRES 0.109618 Hz  
 AQ 4.5613556 sec  
 RG 406.4  
 DW 139.200 usec  
 DE 54.00 usec  
 TE 299.2 K  
 D1 1.00000000 sec  
 TD0 1

==== CHANNEL f1 =====  
 NUC1 1H  
 P1 9.75 usec  
 PL1 0.00 dB  
 SFO1 300.1315007 MHz

F2 - Processing parameters  
 SI 32768  
 SF 300.1300042 MHz  
 WDW no  
 SSB 0  
 LB 0.00 Hz  
 GB 0  
 PC 1.00

# Elemental Composition Report

Tolerance = 5.0 PPM / DBE: min = -1.5, max = 80.0  
 Selected filters: None

Monoisotopic Mass, Even Electron Ions

25 formula(e) evaluated with 1 results within limits (all results (up to 1000) for each mass)

Elements Used:

C: 0-25 H: 0-31 N: 0-4 O: 0-5

File name: dc-2-94-201

Instrument: LCT KC366

Method: ESI-TOF

dc-2-94-201 30 (0.752) AM (Cen,8, 90.00, Ar,4000.0,1222.14,0.70,LS 6); Sm (SG, 2x4.00); Cm (29:36)

Notebook Ref: 24820

Test name: Accurate Mass

Base Peak Mass: 467.22994995

IU Database#: 24820

06-May-2010 11:30:37

1: TOF MS ES+  
 3.50e3

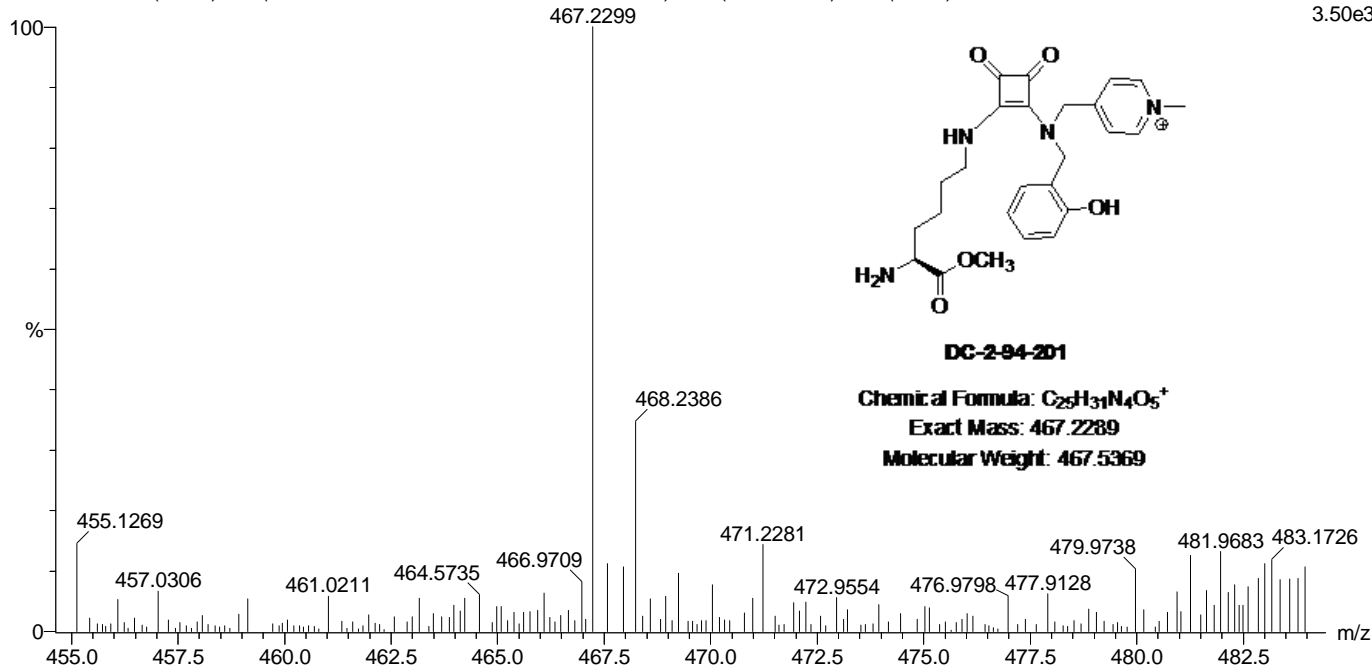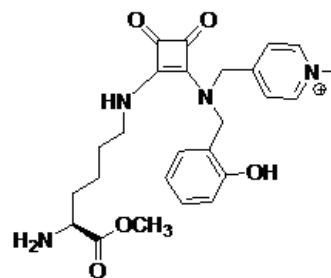

**DC-2-94-201**

**Chemical Formula: C<sub>25</sub>H<sub>31</sub>N<sub>4</sub>O<sub>5</sub><sup>+</sup>**

**Exact Mass: 467.2289**

**Molecular Weight: 467.5369**

Minimum: 80.00  
 Maximum: 100.00

| Mass     | RA     | Calc. Mass | mDa | PPM | DBE  | i-FIT | Formula                                                       |
|----------|--------|------------|-----|-----|------|-------|---------------------------------------------------------------|
| 467.2299 | 100.00 | 467.2294   | 0.5 | 1.1 | 12.5 | 38.6  | C <sub>25</sub> H <sub>31</sub> N <sub>4</sub> O <sub>5</sub> |

8.651  
 8.628  
 7.854  
 7.833  
 7.606  
 7.604  
 7.580  
 7.578  
 7.408  
 7.405  
 7.381  
 7.378  
 7.296  
 7.187  
 7.165  
 7.161  
 7.147  
 7.090  
 7.066  
 7.063  
 5.127  
 4.986  
 4.690  
 4.689  
 4.689  
 4.688  
 4.687  
 4.684  
 4.682  
 4.679  
 4.678  
 4.678  
 4.677  
 4.676  
 4.675  
 4.675  
 4.674  
 4.673  
 4.672  
 4.672  
 4.671  
 4.670  
 4.669  
 4.669  
 4.668  
 4.667  
 4.666  
 4.666  
 4.665  
 4.664  
 4.664  
 4.663  
 4.662  
 4.661  
 4.661  
 4.660  
 4.659  
 4.658  
 4.658  
 4.657  
 4.656  
 4.656  
 4.655  
 4.653  
 4.653  
 4.597  
 4.266  
 3.341  
 3.325  
 3.212  
 3.185

Current Data Parameters  
 NAME DC-2-91-101-5min  
 EXPNO 1  
 PROCNO 1

F2 - Acquisition Parameters  
 Date\_ 20100226  
 Time 9.14  
 INSTRUM spect  
 PROBHD 5 mm QNP 1H/1  
 PULPROG zg  
 TD 32768  
 SOLVENT D2O  
 NS 32  
 DS 0  
 SWH 3591.954 Hz  
 FIDRES 0.109618 Hz  
 AQ 4.5613556 sec  
 RG 406.4  
 DW 139.200 usec  
 DE 54.00 usec  
 TE 298.2 K  
 D1 1.00000000 sec  
 TD0 1

==== CHANNEL f1 =====  
 NUC1 1H  
 P1 9.75 usec  
 PL1 0.00 dB  
 SFO1 300.1315007 MHz

F2 - Processing parameters  
 SI 32768  
 SF 300.1300042 MHz  
 WDW no  
 SSB 0  
 LB 0.00 Hz  
 GB 0  
 PC 1.00

DC-2-91-101-5min

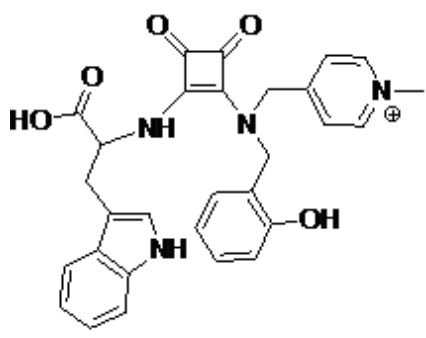

**DC-2-91-1**

**Chemical Formula: C<sub>29</sub>H<sub>27</sub>N<sub>4</sub>O<sub>5</sub><sup>+</sup>**  
**Exact Mass: 511.1976**  
**Molecular Weight: 511.5479**

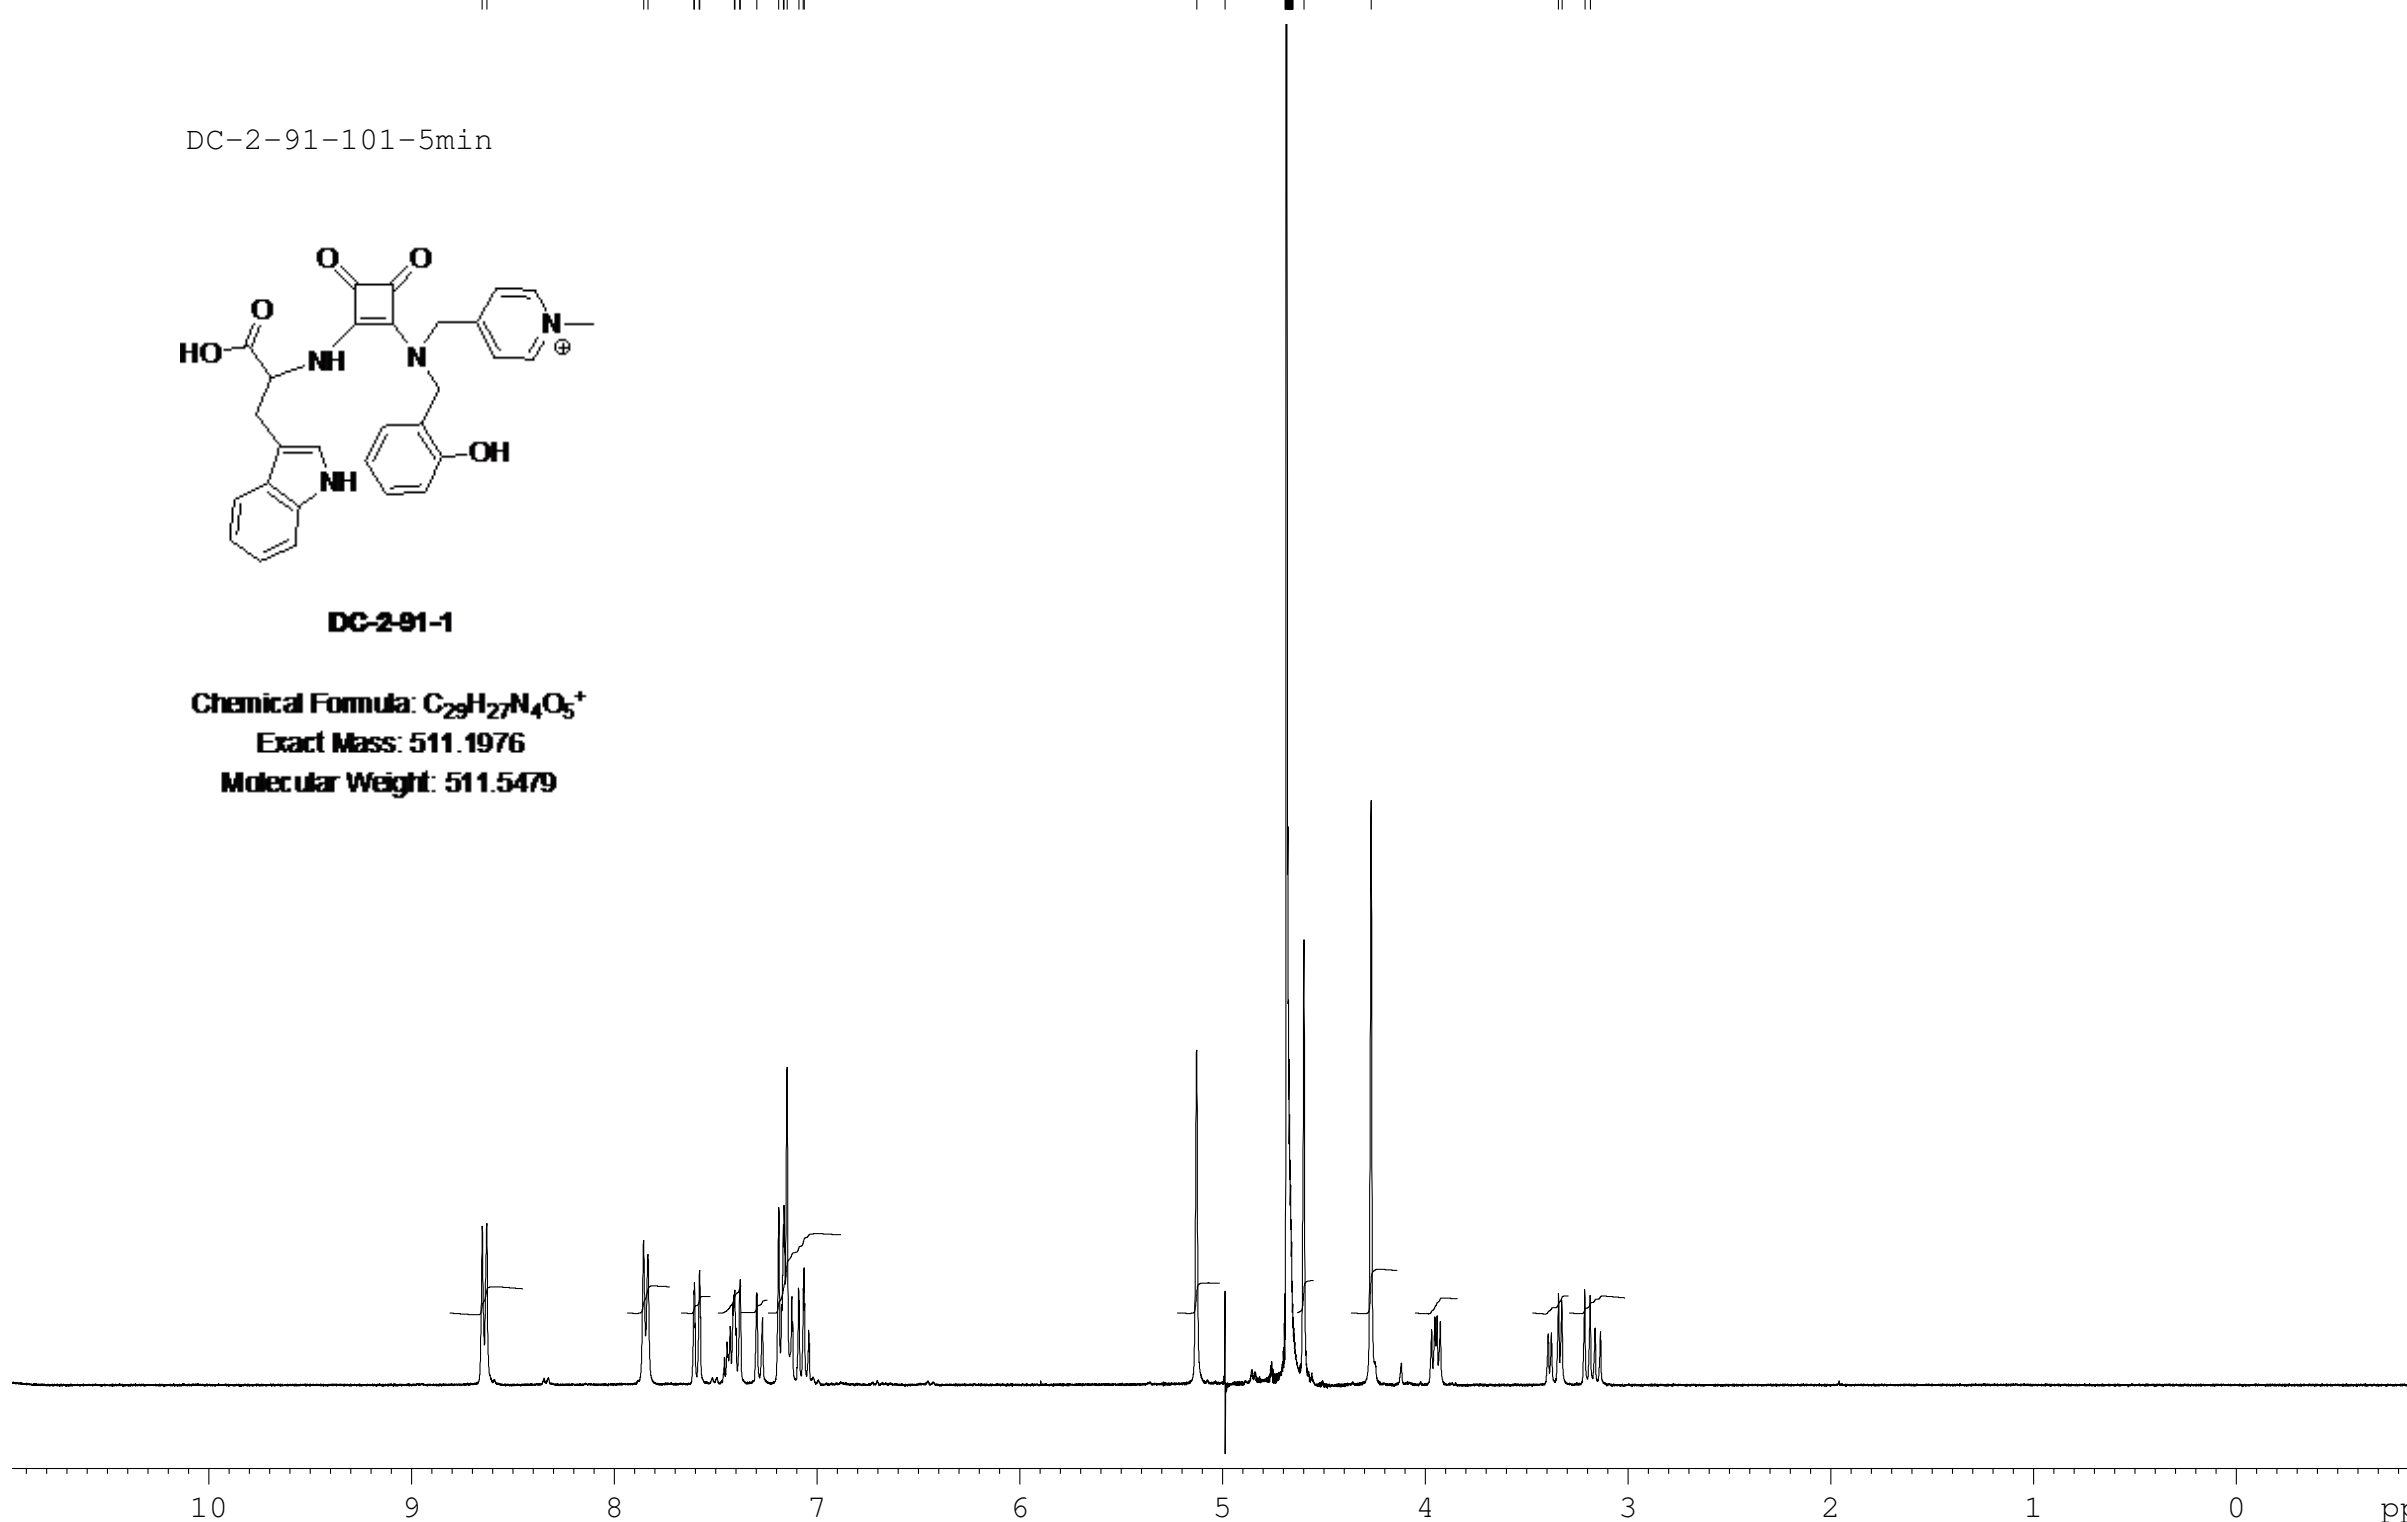

1.715  
 1.860  
 1.172  
 1.959  
 0.891  
 5.552  
 2.123  
 2.318  
 3.014  
 1.000  
 1.197  
 1.067

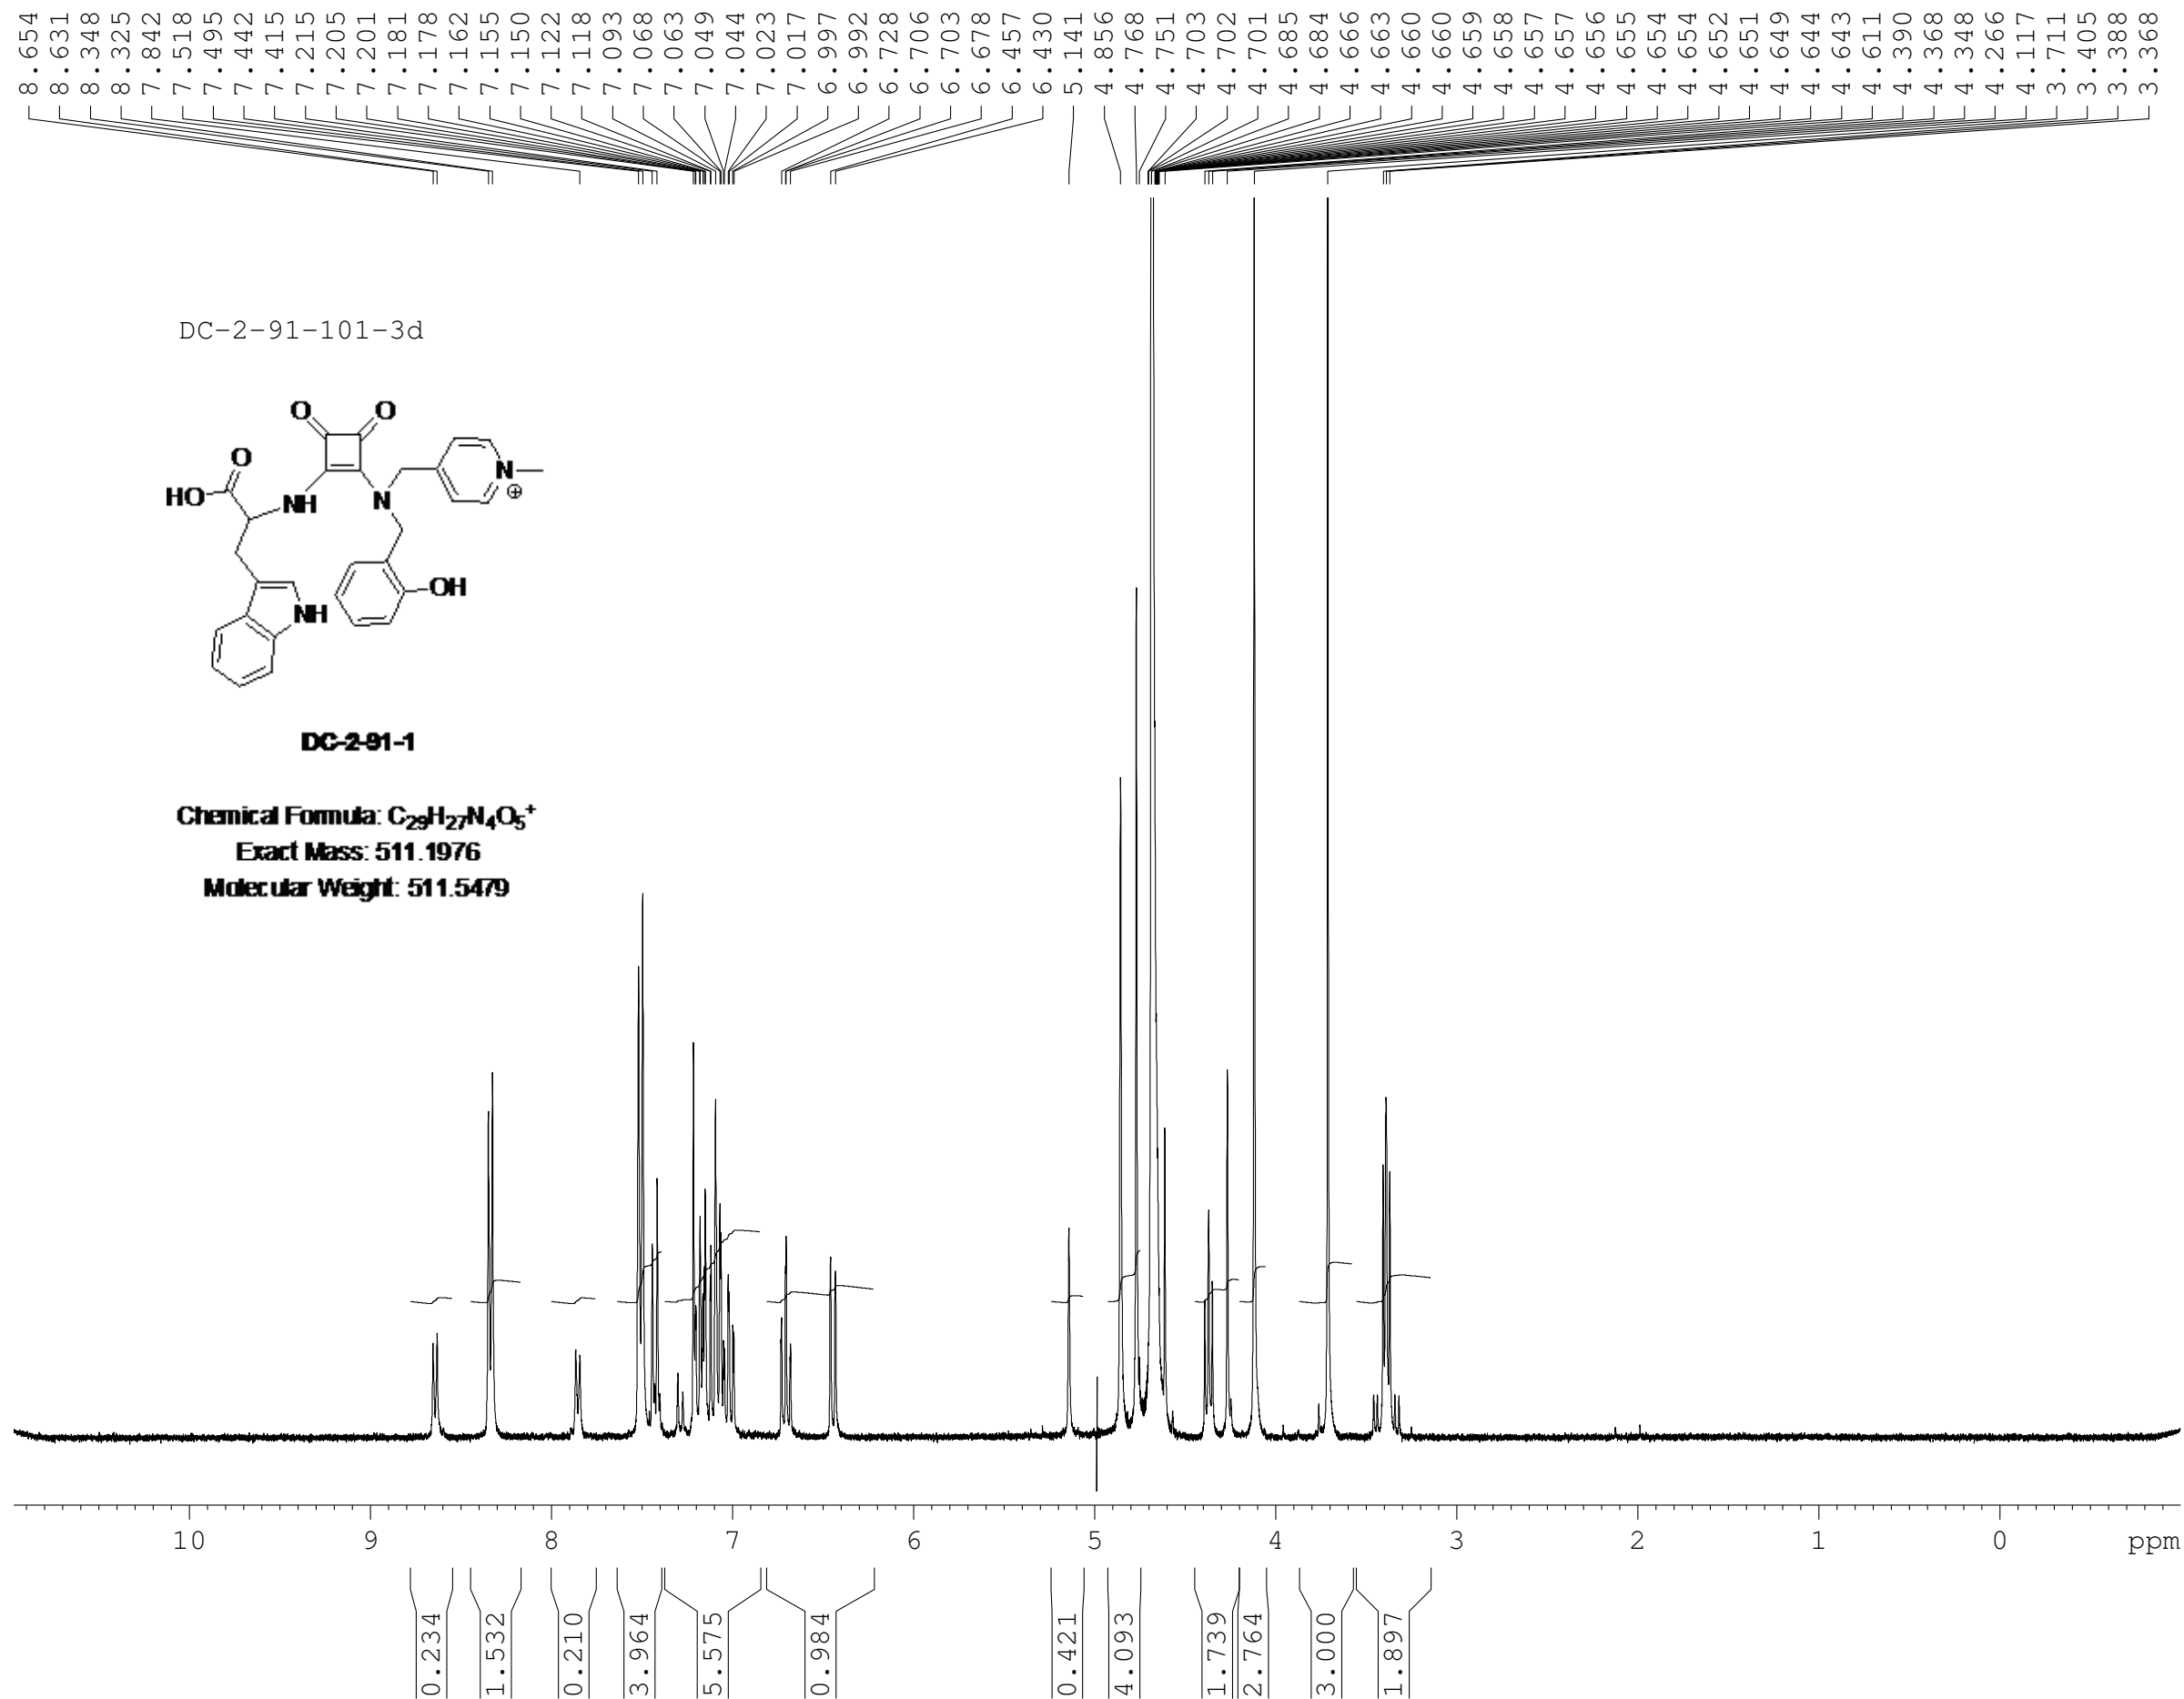

Current Data Parameters  
 NAME DC-2-91-101-3d  
 EXPNO 1  
 PROCNO 1

F2 - Acquisition Parameters  
 Date\_ 20100301  
 Time 18.18  
 INSTRUM spect  
 PROBHD 5 mm QNP 1H/1  
 PULPROG zg  
 TD 32768  
 SOLVENT D2O  
 NS 16  
 DS 0  
 SWH 3591.954 Hz  
 FIDRES 0.109618 Hz  
 AQ 4.5613556 sec  
 RG 512  
 DW 139.200 usec  
 DE 54.00 usec  
 TE 299.2 K  
 D1 1.00000000 sec  
 TD0 1

==== CHANNEL f1 =====  
 NUC1 1H  
 P1 9.75 usec  
 PL1 0.00 dB  
 SFO1 300.1315007 MHz

F2 - Processing parameters  
 SI 32768  
 SF 300.1300042 MHz  
 WDW no  
 SSB 0  
 LB 0.00 Hz  
 GB 0  
 PC 1.00

8.338  
 8.316  
 7.614  
 7.611  
 7.589  
 7.587  
 7.585  
 7.511  
 7.489  
 7.439  
 7.437  
 7.416  
 7.412  
 7.410  
 7.221  
 7.203  
 7.199  
 7.179  
 7.175  
 7.152  
 7.151  
 7.148  
 7.116  
 7.115  
 7.112  
 7.093  
 7.089  
 7.086  
 7.069  
 7.064  
 7.063  
 7.051  
 7.045  
 7.025  
 7.019  
 6.999  
 6.994  
 6.735  
 6.731  
 6.710  
 6.706  
 6.681  
 6.463  
 6.460  
 6.436  
 6.433  
 4.852  
 4.771  
 4.694  
 4.692  
 4.692  
 4.691  
 4.690  
 4.685  
 4.683  
 4.597  
 4.262  
 4.175  
 4.158  
 4.150  
 4.133  
 4.113  
 3.446  
 3.429  
 3.395  
 3.378  
 3.322  
 3.297  
 3.271  
 3.245

Current Data Parameters  
 NAME Dc-2-91-101-6d  
 EXPNO 1  
 PROCNO 1

F2 - Acquisition Parameters  
 Date\_ 20100303  
 Time 18.18  
 INSTRUM spect  
 PROBHD 5 mm QNP 1H/1  
 PULPROG zg  
 TD 32768  
 SOLVENT D2O  
 NS 16  
 DS 0  
 SWH 3591.954 Hz  
 FIDRES 0.109618 Hz  
 AQ 4.5613556 sec  
 RG 574.7  
 DW 139.200 usec  
 DE 54.00 usec  
 TE 299.2 K  
 D1 1.0000000 sec  
 TD0 1

==== CHANNEL f1 =====  
 NUC1 1H  
 P1 9.75 usec  
 PL1 0.00 dB  
 SFO1 300.1315007 MHz

F2 - Processing parameters  
 SI 32768  
 SF 300.1300042 MHz  
 WDW no  
 SSB 0  
 LB 0.00 Hz  
 GB 0  
 PC 1.00

Dc-2-91-101-6d

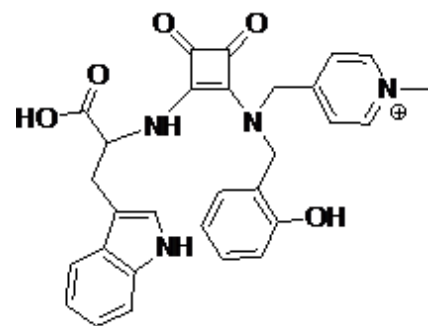

**DC-2-91-1**

**Chemical Formula: C<sub>29</sub>H<sub>27</sub>N<sub>4</sub>O<sub>5</sub><sup>+</sup>**  
**Exact Mass: 511.1976**  
**Molecular Weight: 511.5479**

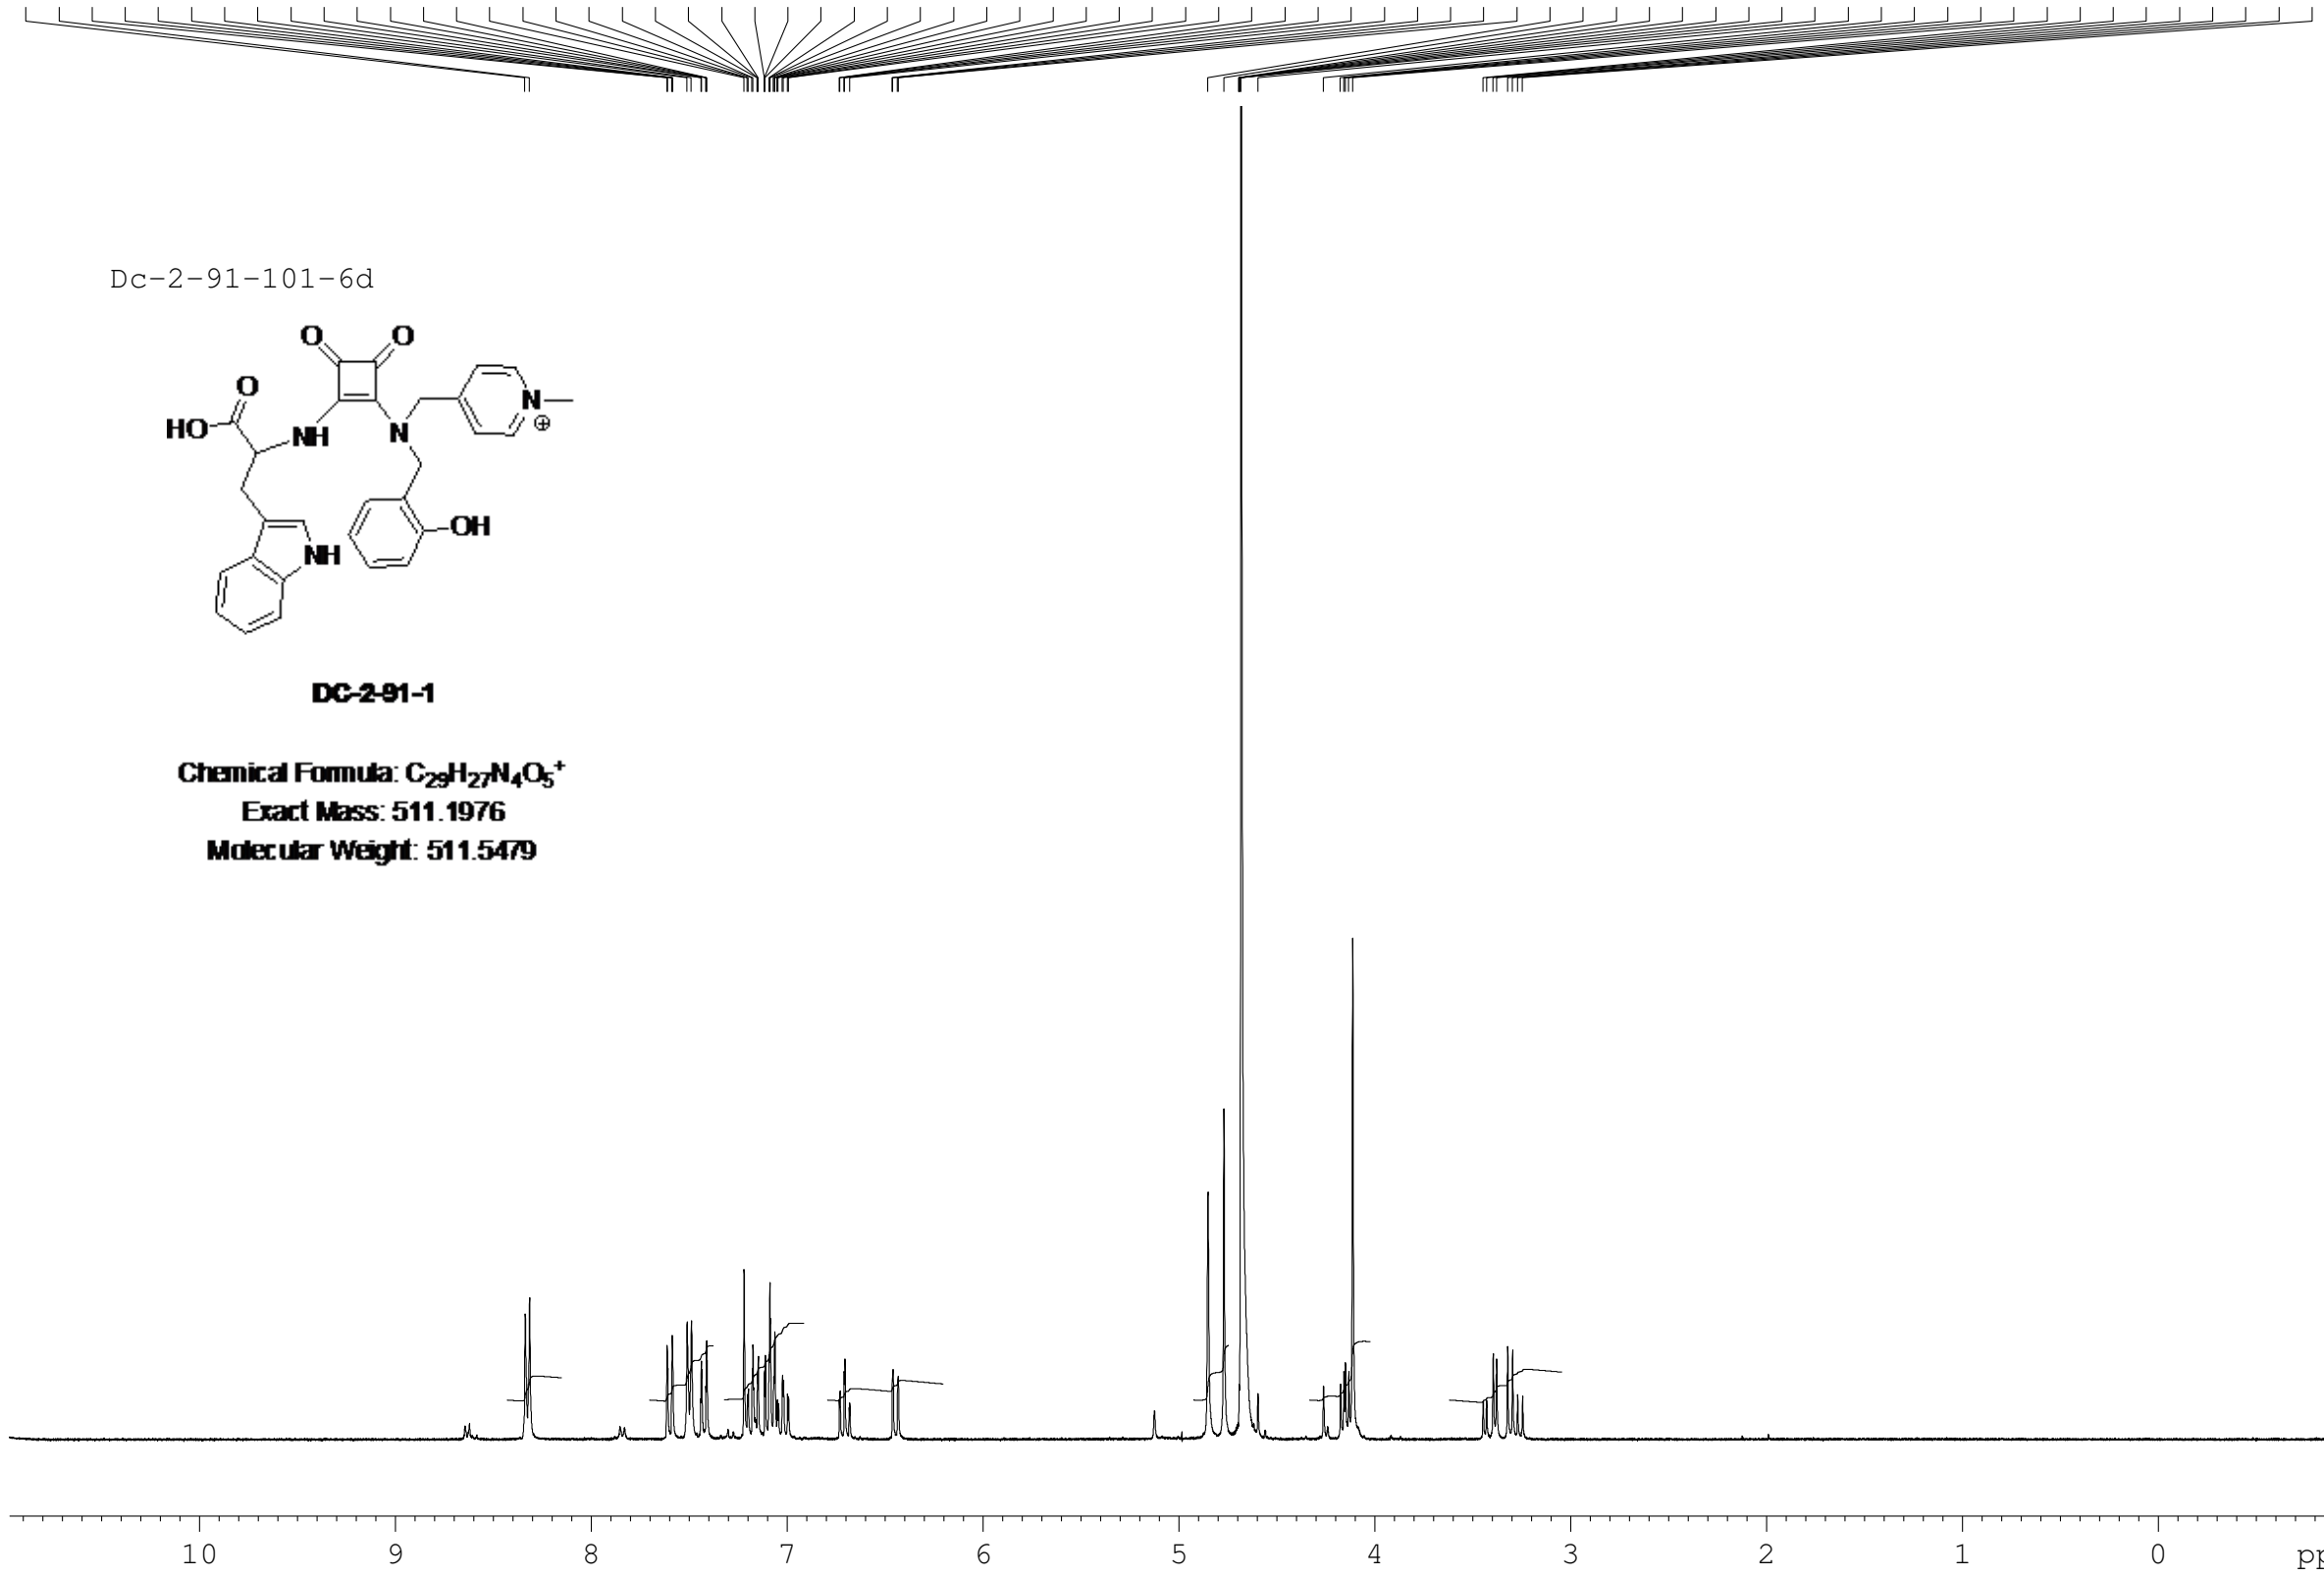

1.594  
 3.899  
 5.504  
 1.149  
 3.929  
 4.194  
 2.000

## Elemental Composition Report

### Multiple Mass Analysis: 2 mass(es) processed

Tolerance = 10.0 PPM / DBE: min = -1.5, max = 80.0

Selected filters: None

Monoisotopic Mass, Even Electron Ions

82 formula(e) evaluated with 1 results within limits (all results (up to 1000) for each mass)

Elements Used:

C: 0-29 H: 0-27 N: 0-4 O: 0-5 Na: 0-1

File name: dc-2-91-101

Instrument: LCT KC366

Method: ESI-TOF

dc-2-91-101 31 (0.786) AM (Cen,6, 90.00, Ar,4000.0,922.36,0.70,LS 4); Sm (SG, 2x4.00); Cm (27:50)

Notebook Ref: 24689

Test name: Accurate Mass

Base Peak Mass: 511.19808960

IU Database#: 24689

28-Apr-2010 11:56:47

1: TOF MS ES+  
4.65e3

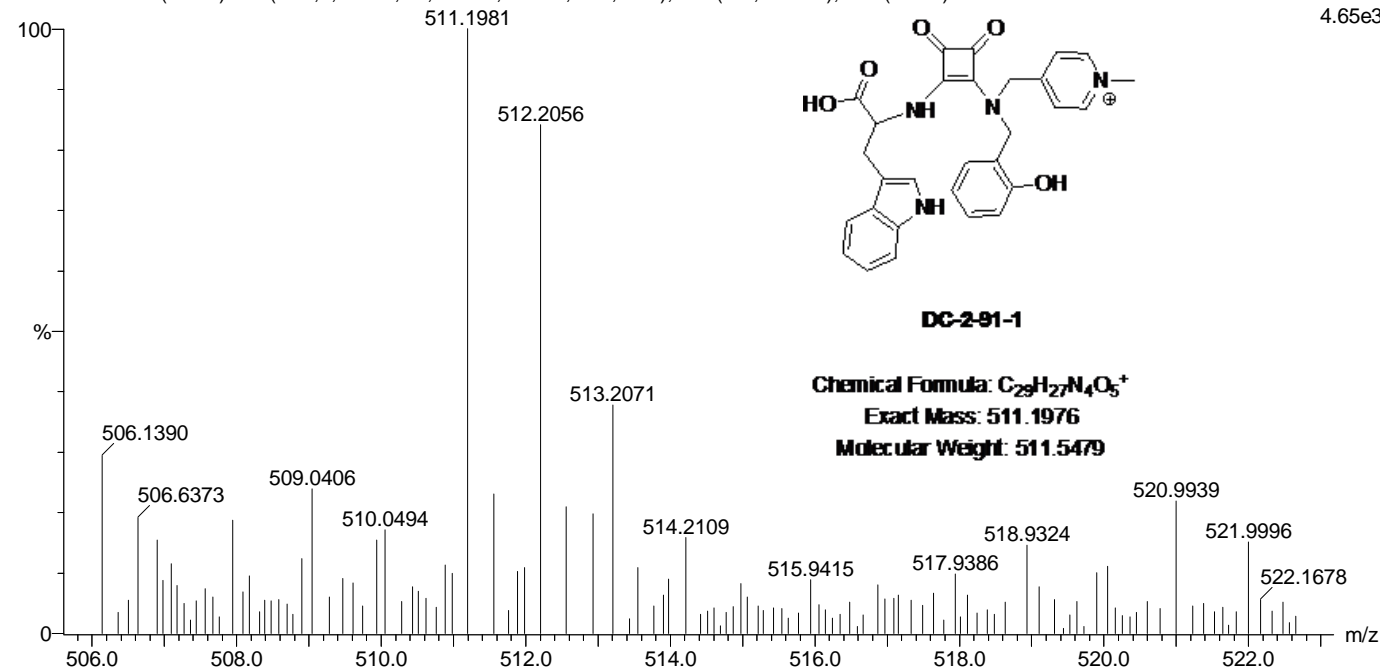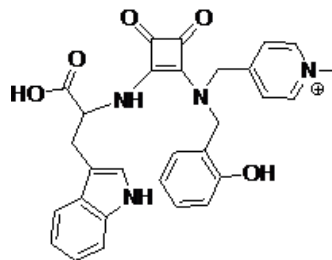

**DC-2-91-1**

**Chemical Formula: C<sub>29</sub>H<sub>27</sub>N<sub>4</sub>O<sub>5</sub><sup>+</sup>**

**Exact Mass: 511.1976**

**Molecular Weight: 511.5479**

Minimum: 80.00 -1.5  
 Maximum: 100.00 5.0 10.0 80.0

| Mass     | RA     | Calc. Mass | mDa | PPM | DBE  | i-FIT  | Formula       |
|----------|--------|------------|-----|-----|------|--------|---------------|
| 511.1981 | 100.00 | 511.1981   | 0.0 | 0.0 | 18.5 | 1145.0 | C29 H27 N4 O5 |
| 512.2056 | 84.11  | ---        |     |     |      |        |               |

8.664  
 8.641  
 7.873  
 7.851  
 7.506  
 7.483  
 7.480  
 7.427  
 7.412  
 7.403  
 7.400  
 7.397  
 7.298  
 7.208  
 7.165  
 7.151  
 7.143  
 7.111  
 7.107  
 7.084  
 5.150  
 4.696  
 4.695  
 4.694  
 4.694  
 4.693  
 4.685  
 4.682  
 4.677  
 4.676  
 4.675  
 4.675  
 4.674  
 4.673  
 4.672  
 4.672  
 4.671  
 4.670  
 4.669  
 4.669  
 4.668  
 4.667  
 4.667  
 4.666  
 4.665  
 4.664  
 4.664  
 4.663  
 4.662  
 4.661  
 4.661  
 4.660  
 4.659  
 4.658  
 4.658  
 4.657  
 4.656  
 4.656  
 4.655  
 4.654  
 4.654  
 4.620  
 4.368  
 4.365  
 4.345  
 4.274  
 3.713  
 3.397  
 3.382  
 3.379  
 3.361

DC-2-91-201-5min

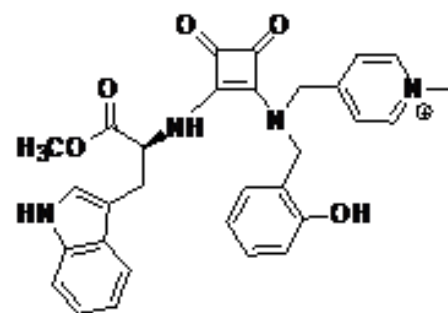

DC-2-91-201

Chemical Formula:  $C_{23}H_{23}N_4O_5^+$   
 Exact Mass: 525.2132  
 Molecular Weight: 525.5745

Current Data Parameters  
 NAME DC-2-91-201-5min  
 EXPNO 1  
 PROCNO 1

F2 - Acquisition Parameters  
 Date\_ 20100226  
 Time 9.21  
 INSTRUM spect  
 PROBHD 5 mm QNP 1H/1  
 PULPROG zg  
 TD 32768  
 SOLVENT D2O  
 NS 32  
 DS 0  
 SWH 3591.954 Hz  
 FIDRES 0.109618 Hz  
 AQ 4.5613556 sec  
 RG 574.7  
 DW 139.200 usec  
 DE 54.00 usec  
 TE 298.2 K  
 D1 1.00000000 sec  
 TD0 1

==== CHANNEL f1 =====  
 NUC1 1H  
 P1 9.75 usec  
 PL1 0.00 dB  
 SFO1 300.1315007 MHz

F2 - Processing parameters  
 SI 32768  
 SF 300.1300042 MHz  
 WDW no  
 SSB 0  
 LB 0.00 Hz  
 GB 0  
 PC 1.00

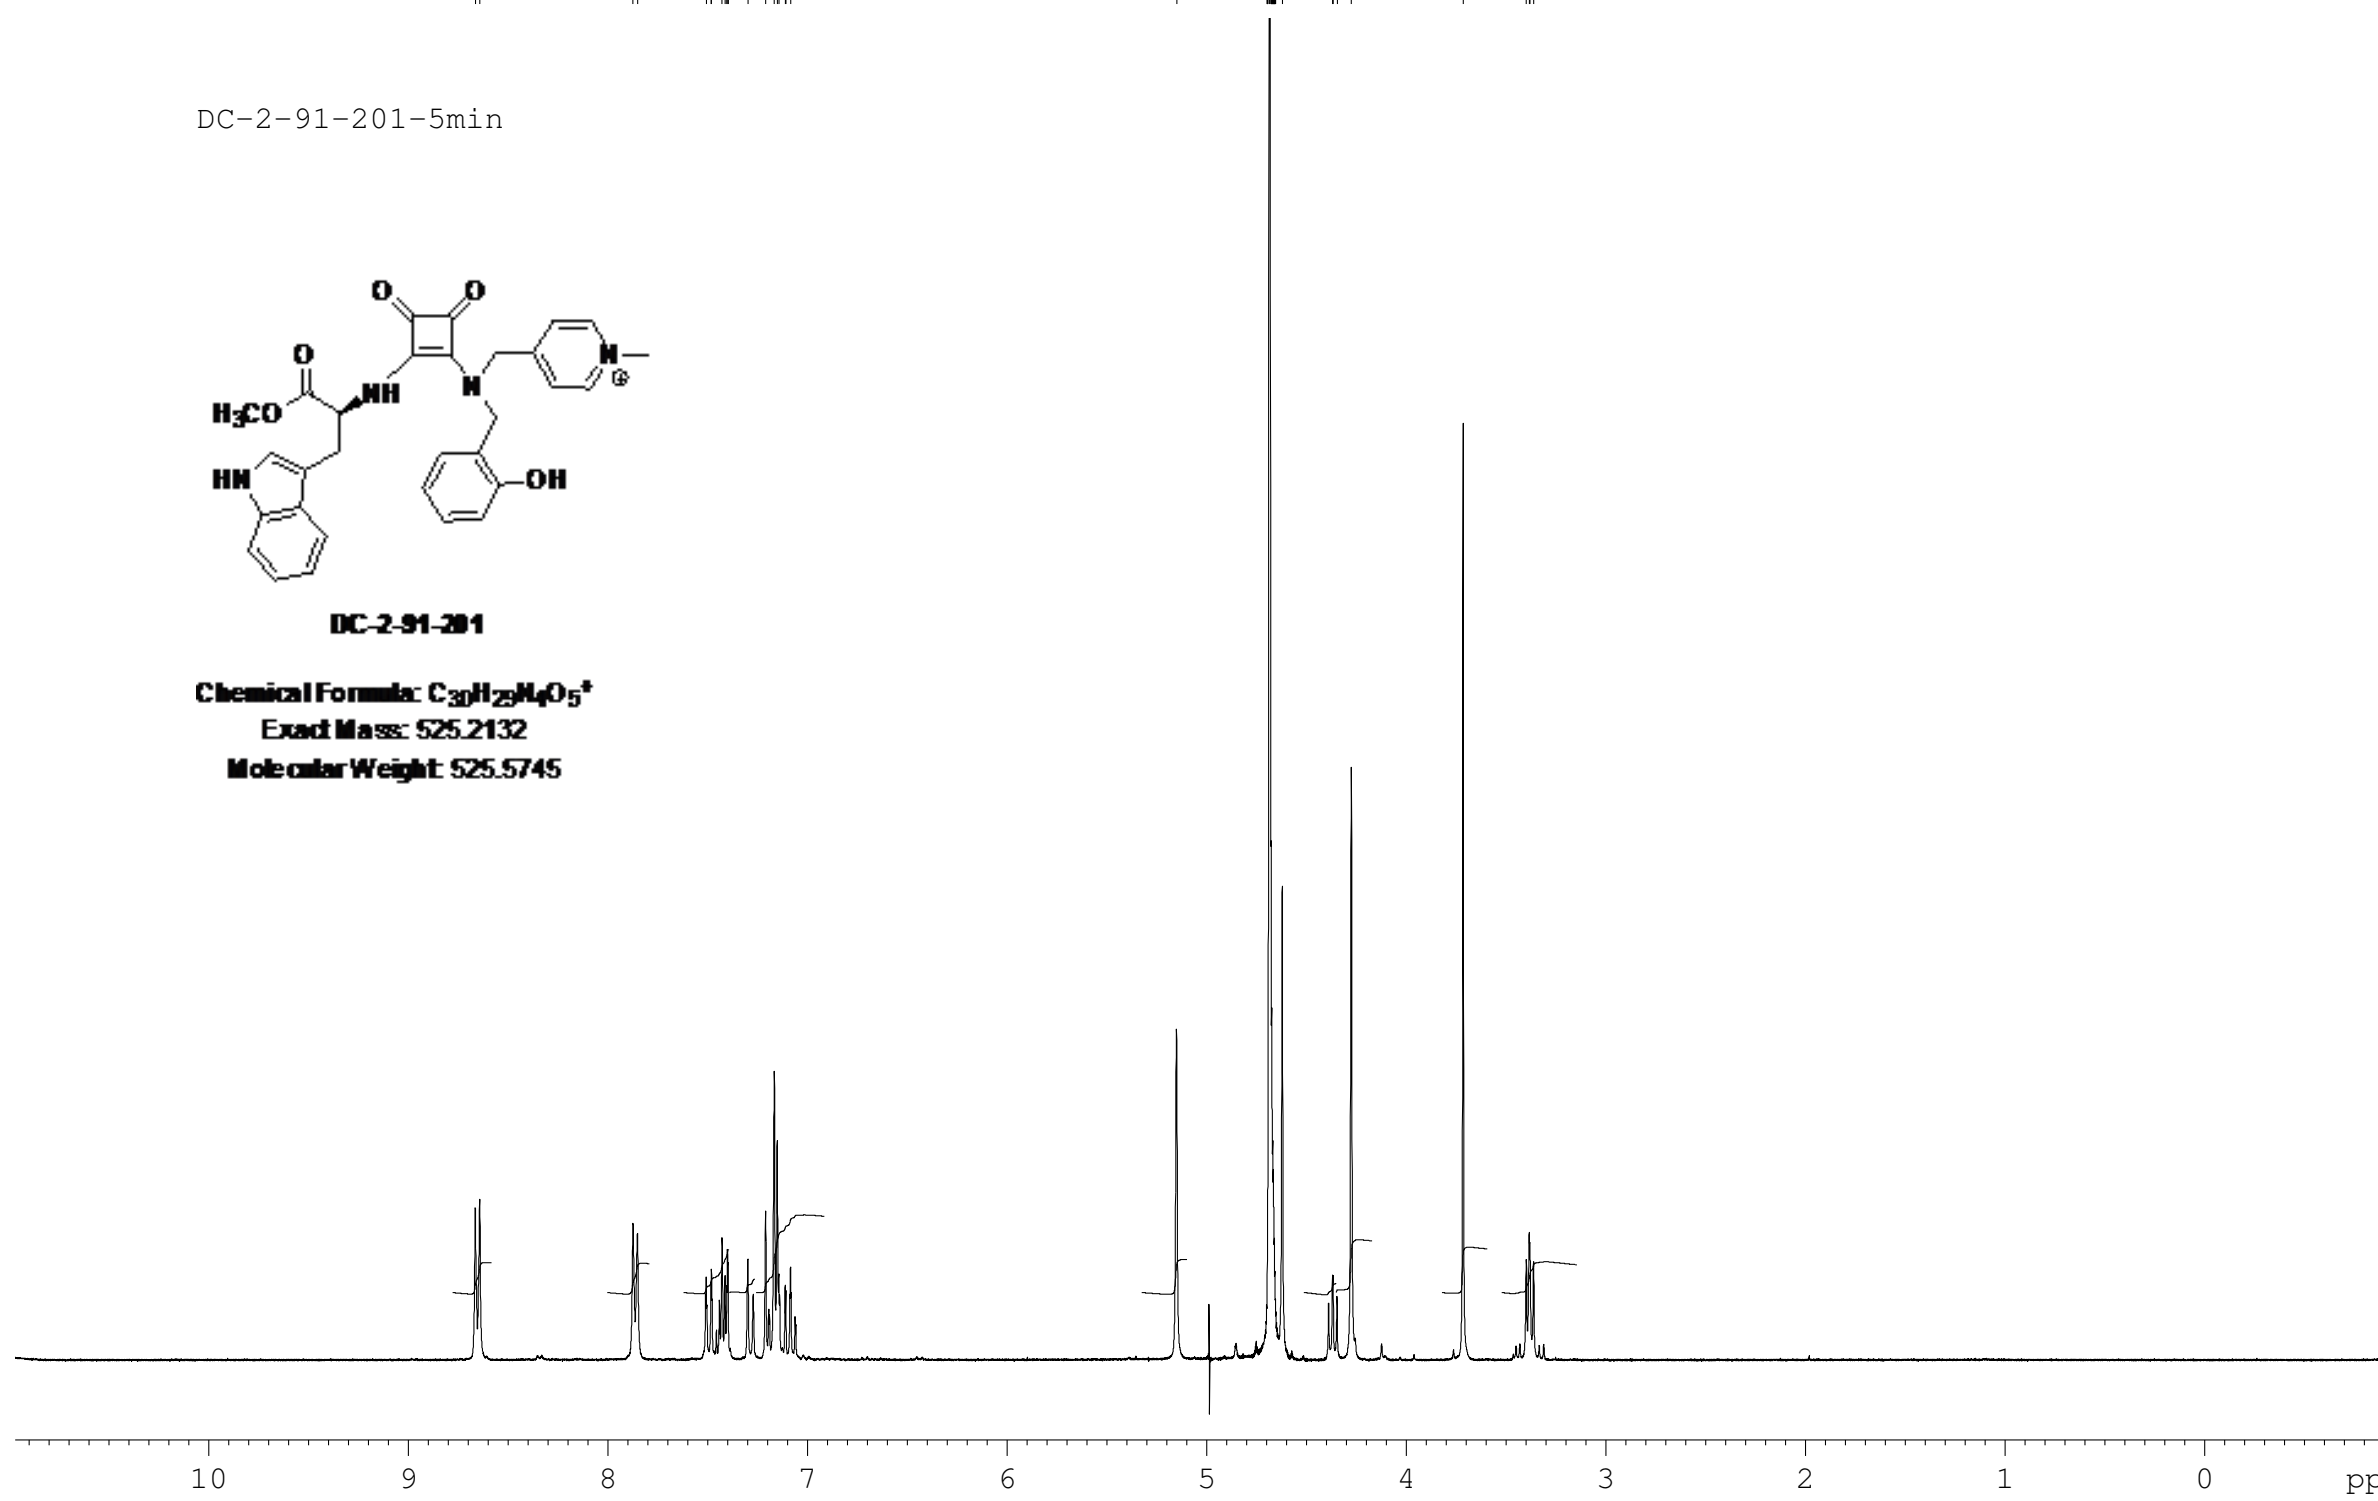

2.042  
 1.980  
 2.961  
 0.915  
 5.241  
 2.254  
 0.653  
 3.550  
 3.000  
 1.906



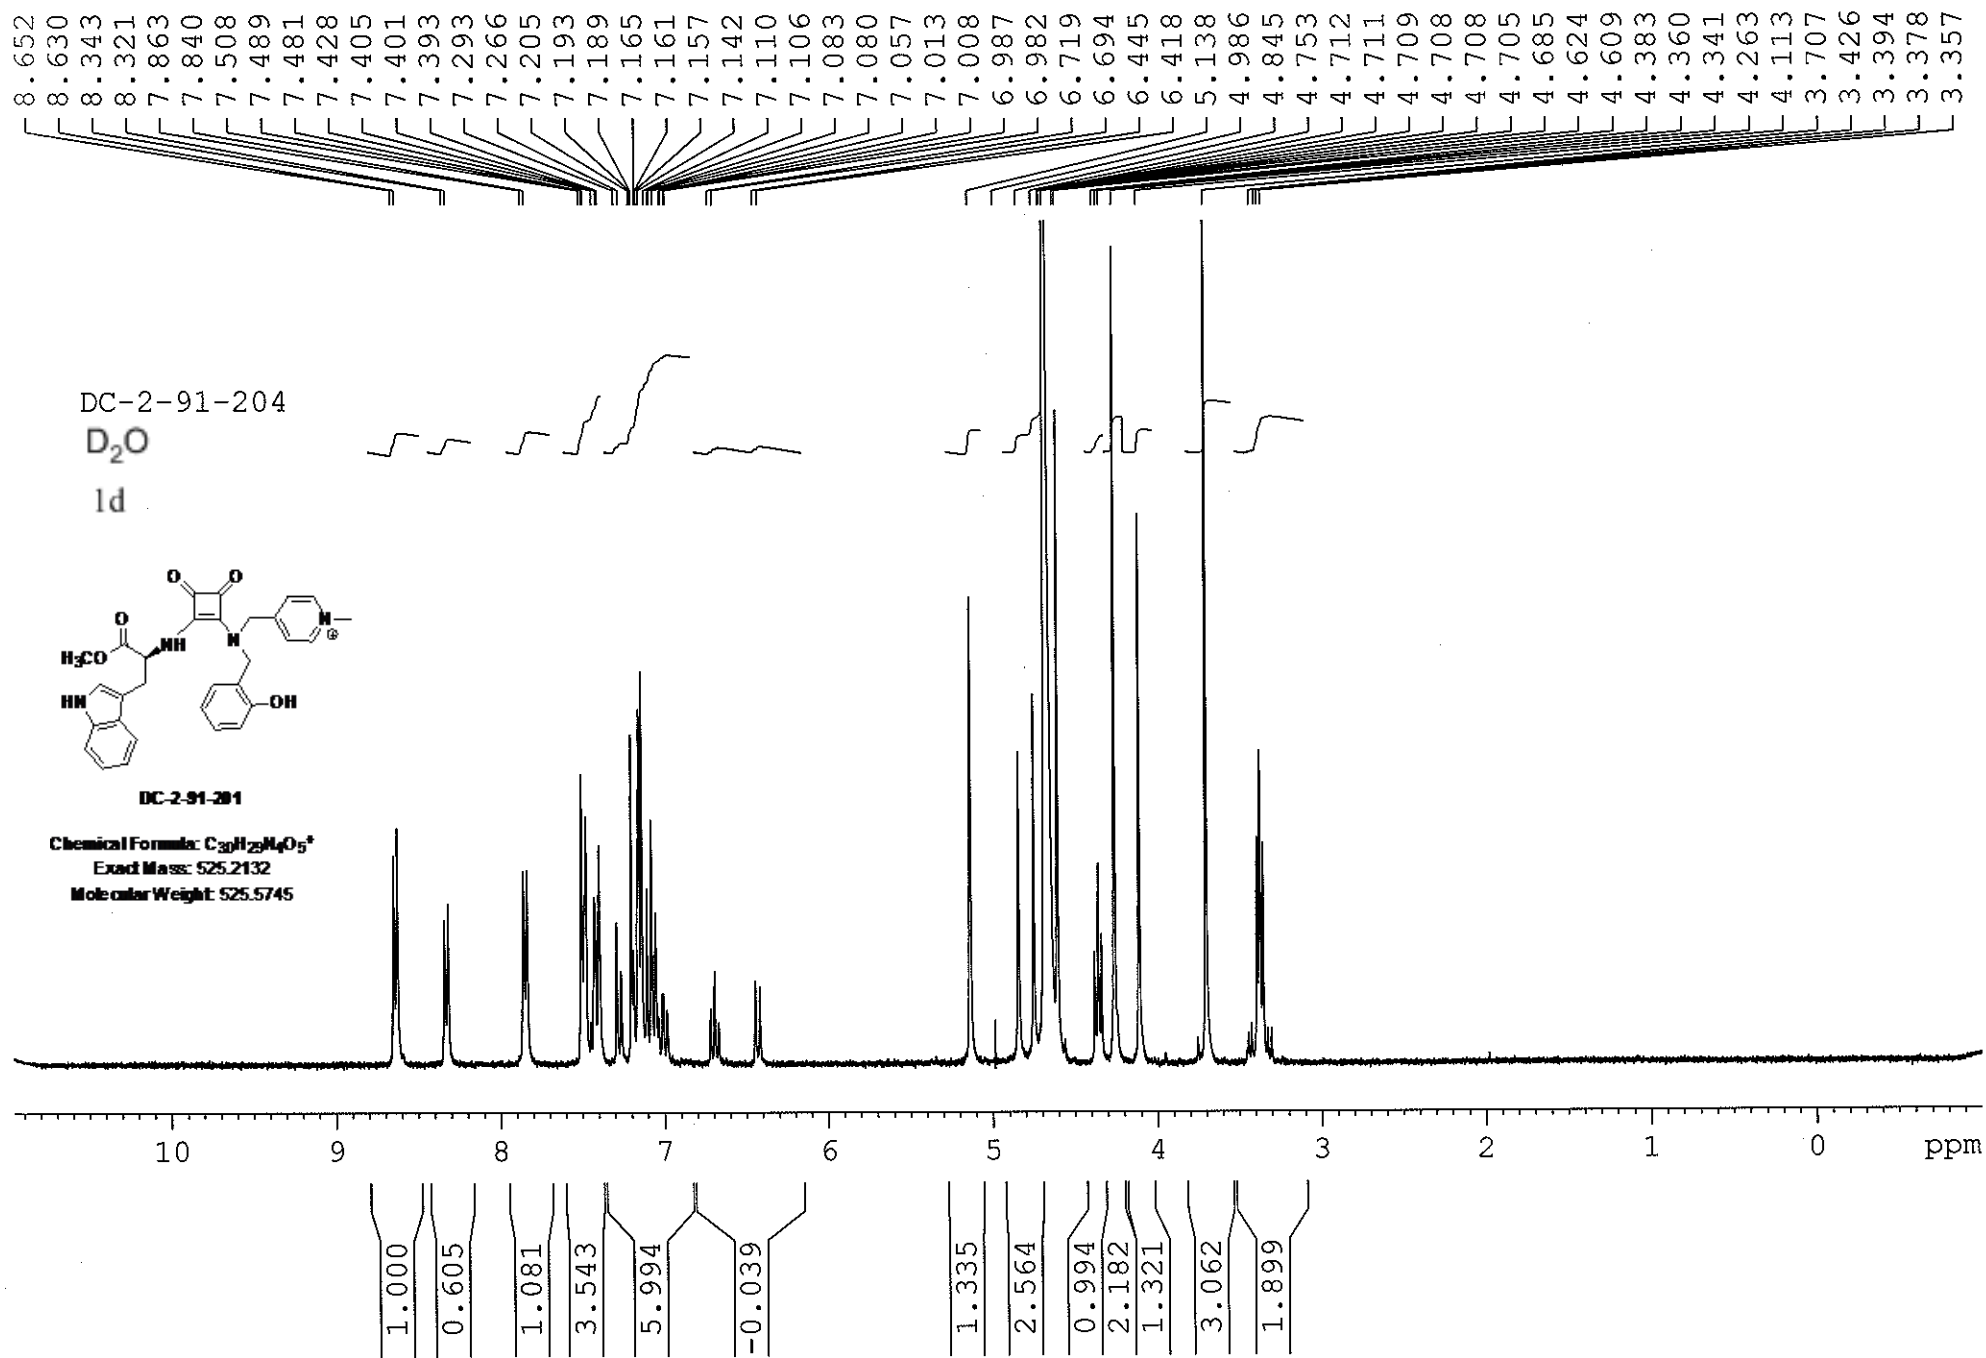

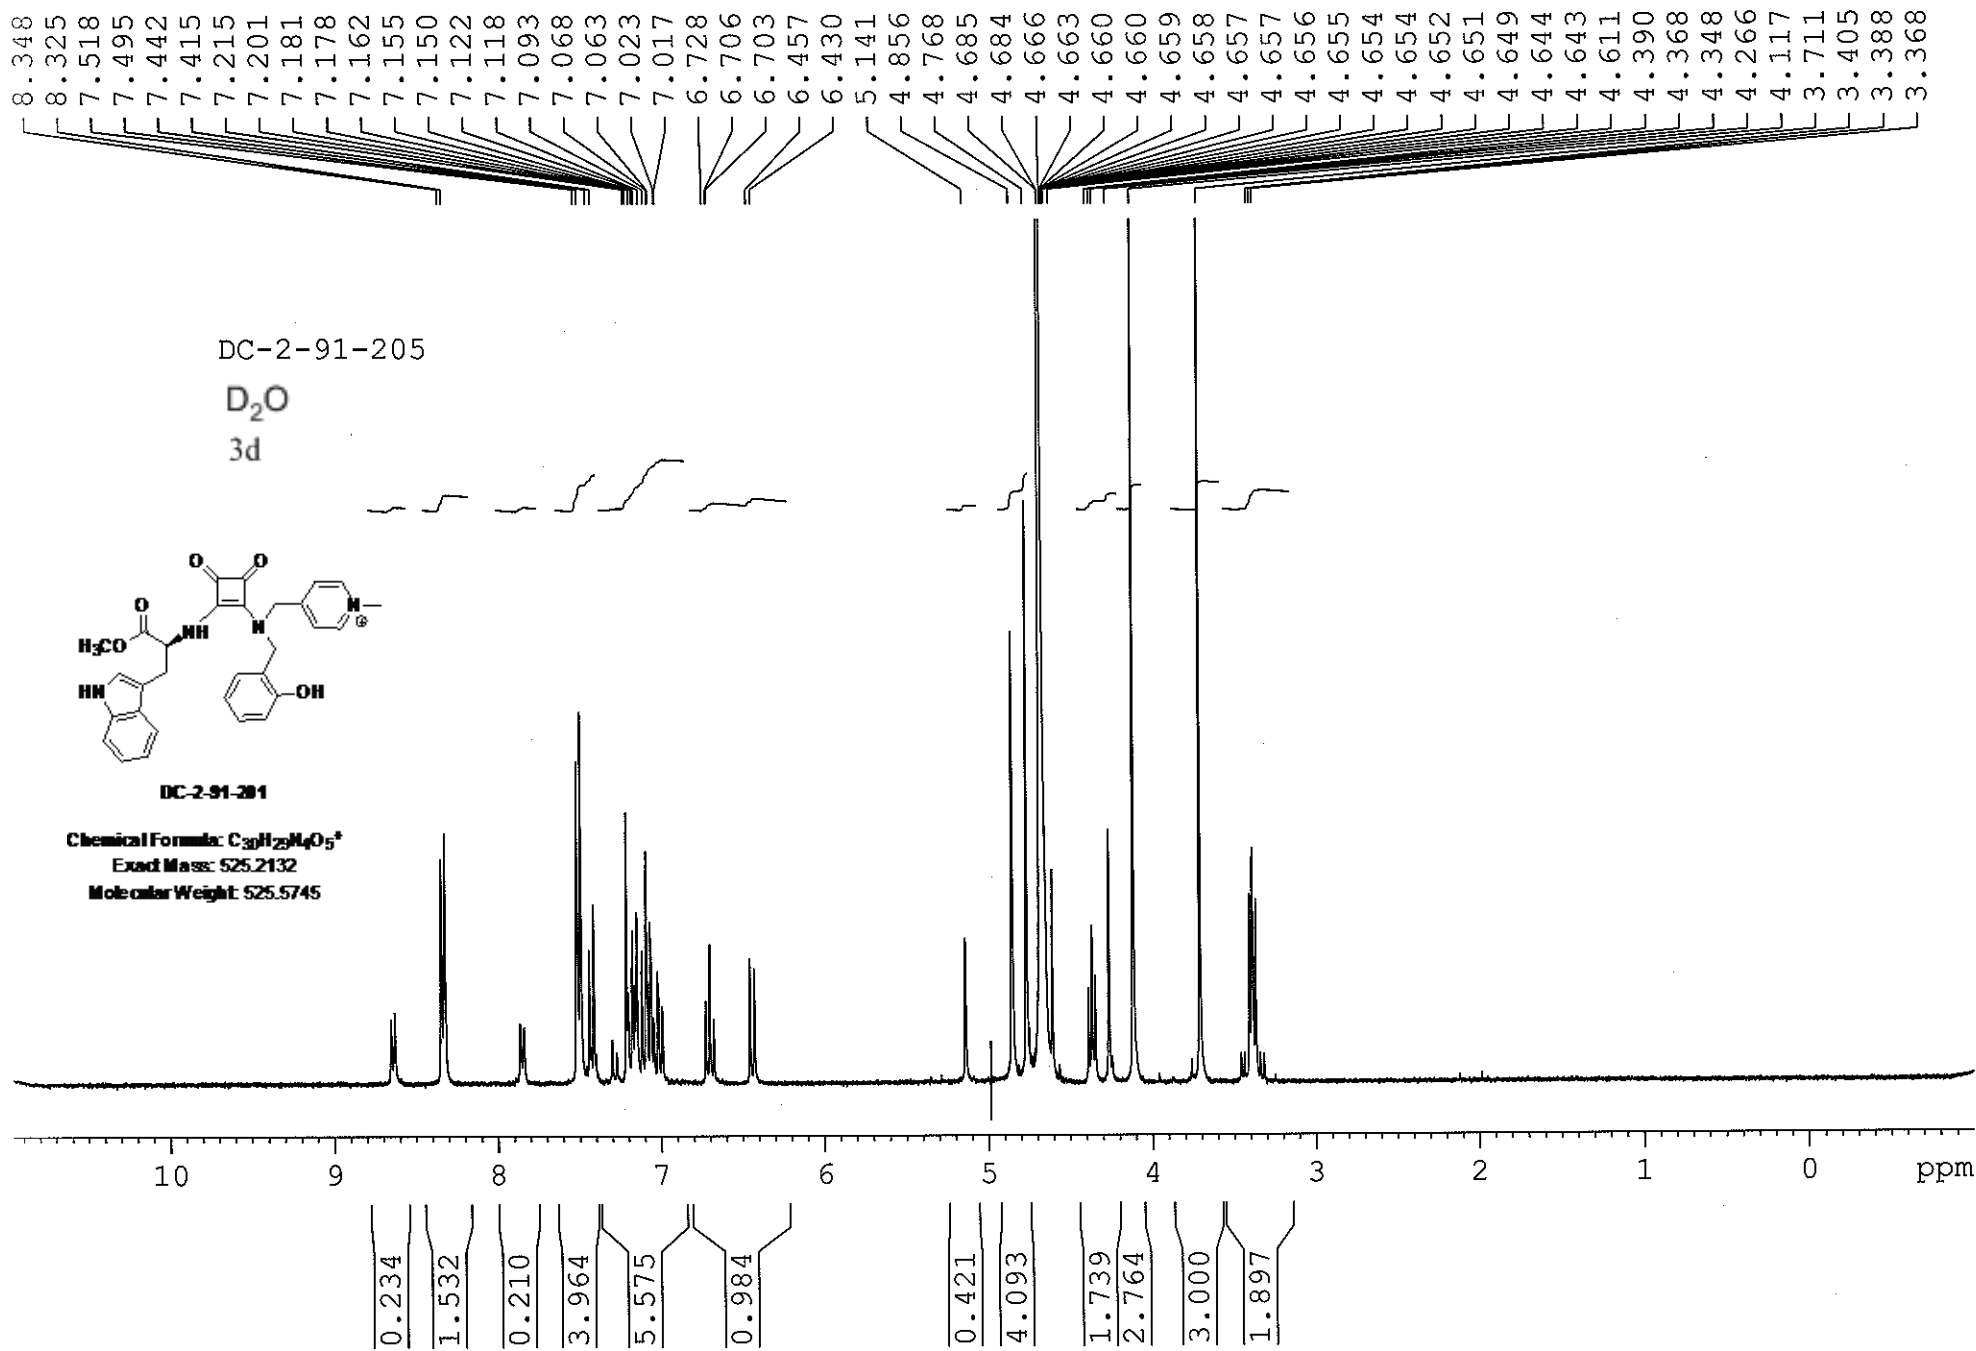

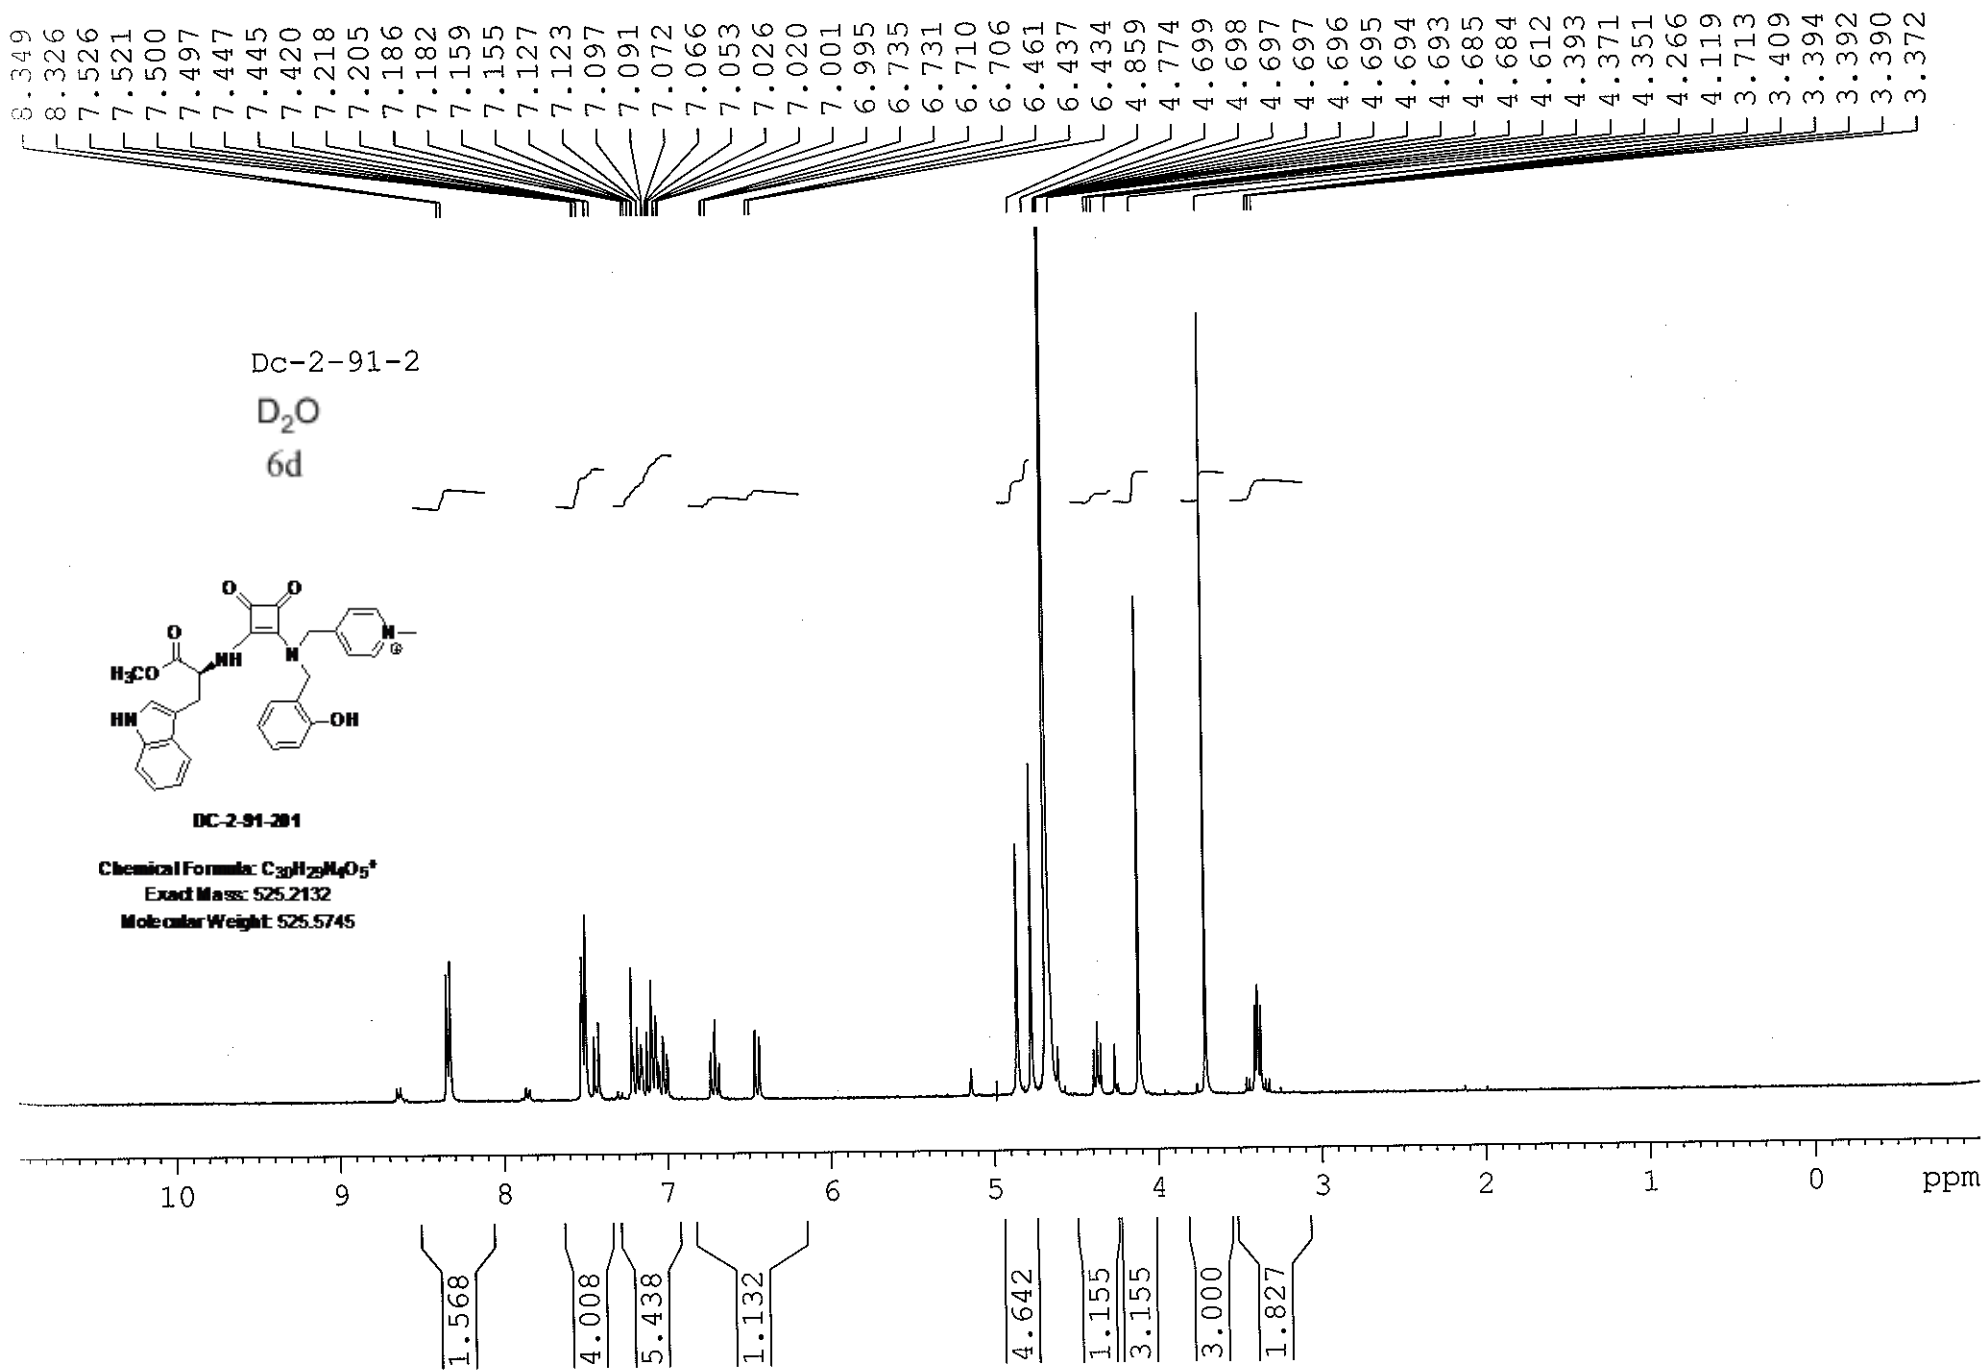

## Elemental Composition Report

Tolerance = 20.0 PPM / DBE: min = -1.5, max = 80.0

Selected filters: None

Monoisotopic Mass, Even Electron Ions

22 formula(e) evaluated with 1 results within limits (all results (up to 1000) for each mass)

Elements Used:

C: 0-30 H: 0-29 N: 0-4 O: 0-5

File name: dc-2-91-201

Instrument: LCT KC366

Method: ESI-TOF

dc-2-91-201 34 (0.853) AM (Cen,8, 90.00, Ar,4000.0,1222.14,0.70,LS 6); Sm (SG, 2x4.00); Cm (27:42)

Notebook Ref: 24822

Test name: Accurate Mass

Base Peak Mass: 525.21215820

IU Database#: 24822

06-May-2010 11:38:59

1: TOF MS ES+  
9.67e3

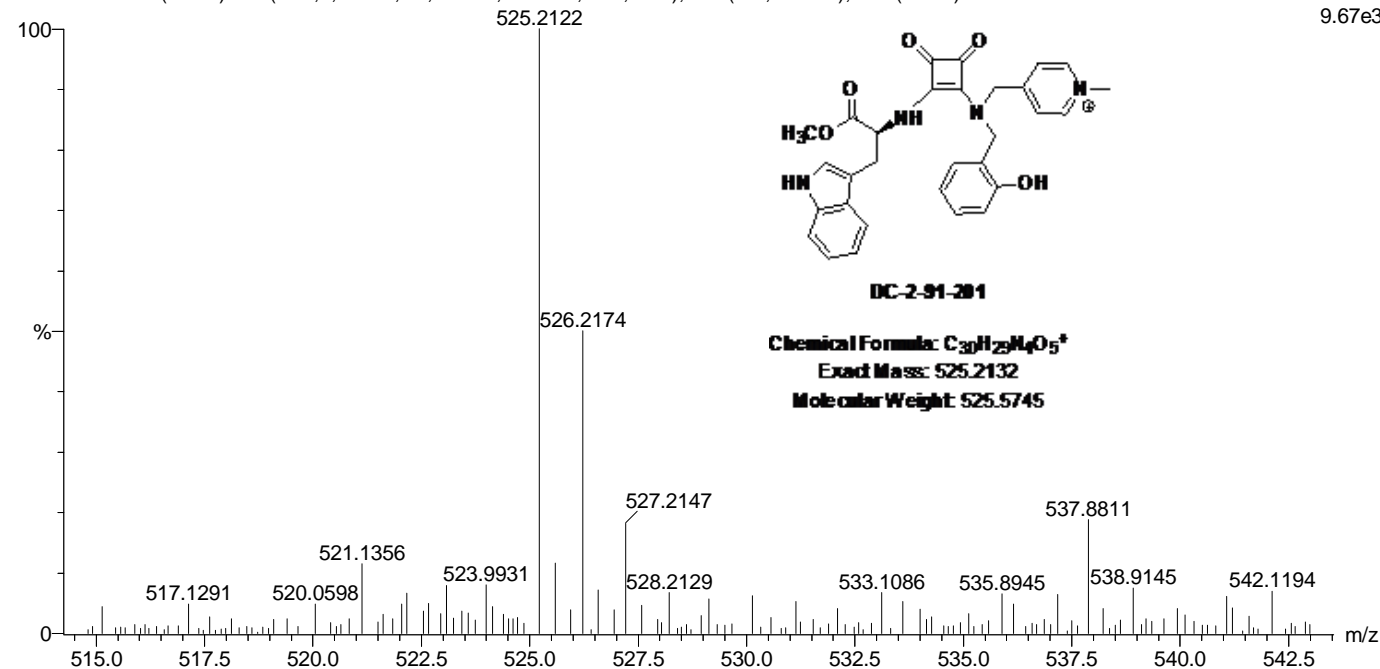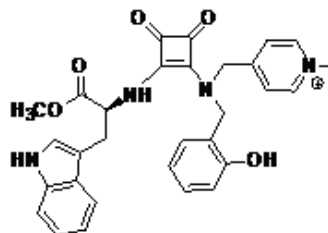

DC-2-91-201

Chemical Formula:  $C_{30}H_{29}N_4O_5^+$

Exact Mass: 525.2132

Molecular Weight: 525.5745

Minimum: 80.00  
 Maximum: 100.00

-1.5  
 80.0

| Mass     | RA     | Calc. Mass | mDa  | PPM  | DBE  | i-FIT | Formula       |
|----------|--------|------------|------|------|------|-------|---------------|
| 525.2122 | 100.00 | 525.2138   | -1.6 | -3.0 | 18.5 | 447.6 | C30 H29 N4 O5 |

File name: dc-3-118-101  
Instrument: LCT KC366  
Method: ESI-TOF

Notebook Ref: 25174  
Test name: Accurate Mass  
Base Peak Mass: 453.22174072

IU Database#: 25174  
01-Jun-2010 15:51:53

dc-3-118-101 146 (3.254) AM (Cen,8, 80.00, Ar,6000.0,0.00,0.70); Sm (SG, 2x4.00); Cm (140:159)

1: TOF MS ES+  
7.46e4

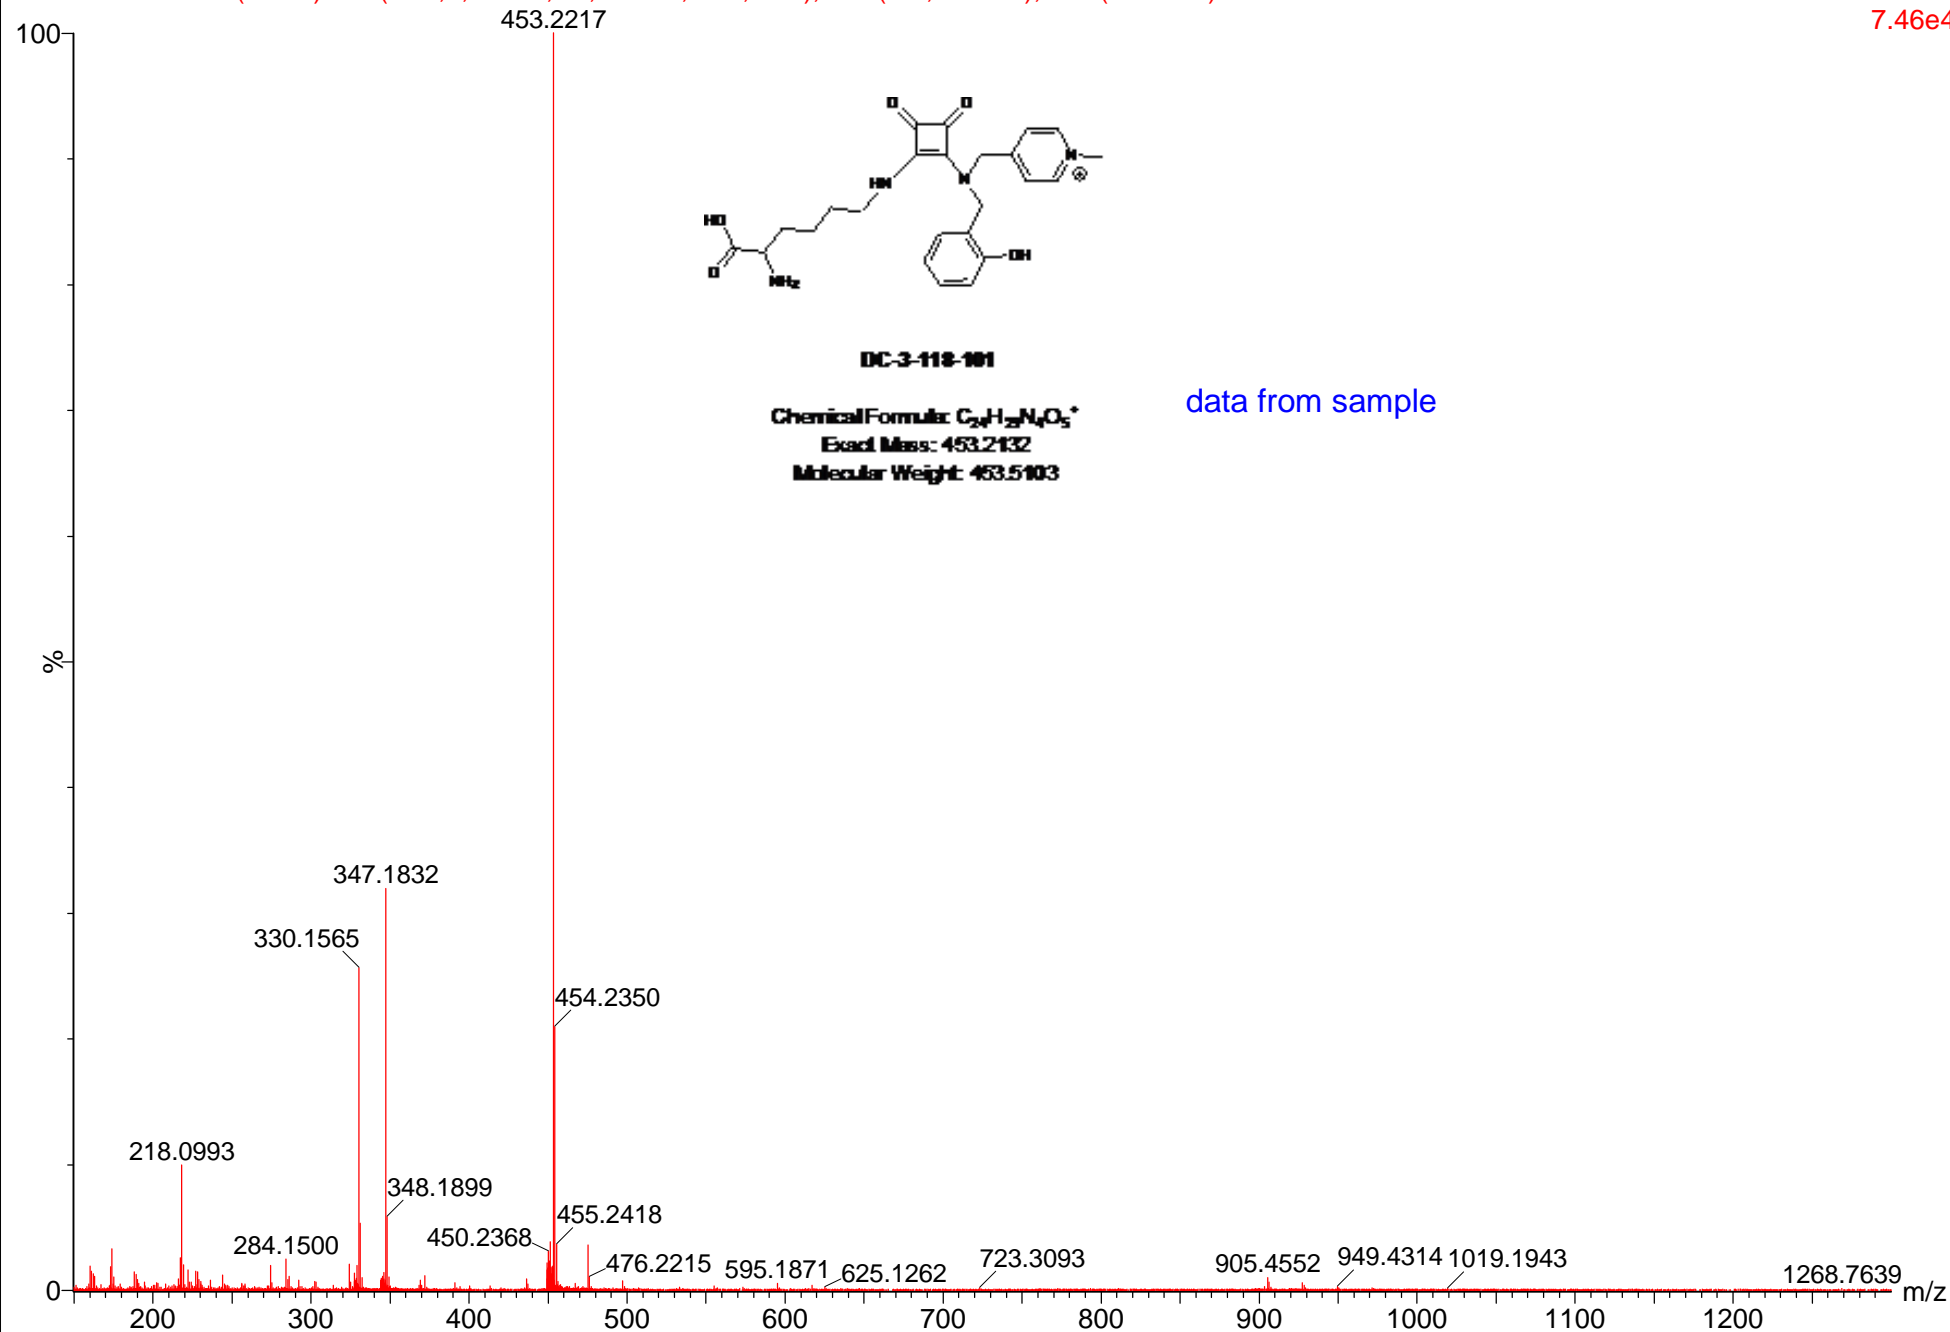

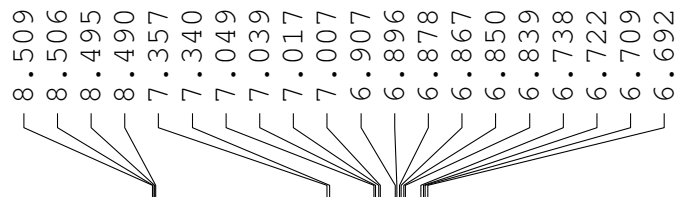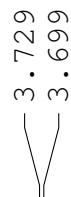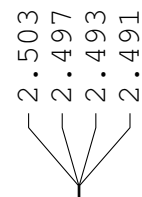

dc-3-127-101

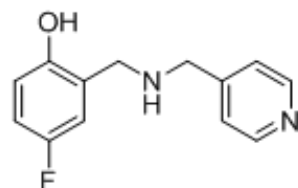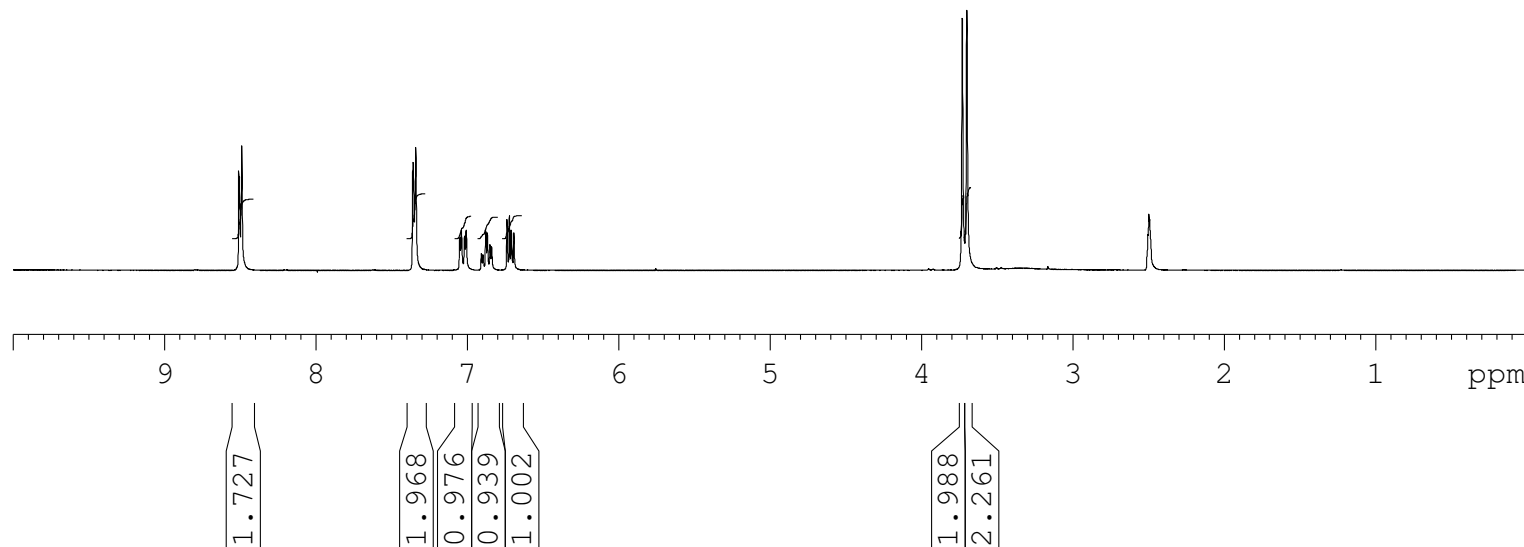

Current Data Parameters

NAME dc-3-127-101  
 EXPNO 1  
 PROCNO 1

F2 - Acquisition Parameters

Date\_ 20100604  
 Time 10.38  
 INSTRUM spect  
 PROBHD 5 mm QNP 1H/1  
 PULPROG zg  
 TD 32768  
 SOLVENT DMSO  
 NS 16  
 DS 0  
 SWH 4789.272 Hz  
 FIDRES 0.146157 Hz  
 AQ 3.4210291 sec  
 RG 406.4  
 DW 104.400 usec  
 DE 54.00 usec  
 TE 296.2 K  
 D1 1.00000000 sec  
 TD0 1

==== CHANNEL f1 =====

NUC1 1H  
 P1 9.75 usec  
 PL1 0.00 dB  
 SFO1 300.1324000 MHz

F2 - Processing parameters

SI 32768  
 SF 300.1300024 MHz  
 WDW no  
 SSB 0  
 LB 0.00 Hz  
 GB 0  
 PC 1.00

8.595  
 8.579  
 7.457  
 7.441  
 7.428  
 7.409  
 7.389  
 7.352  
 7.342  
 7.326  
 7.313  
 7.302  
 7.293  
 7.287  
 7.272  
 7.262

4.886  
 4.662

3.330

2.497  
 2.491

1.225

dc-3-134-101

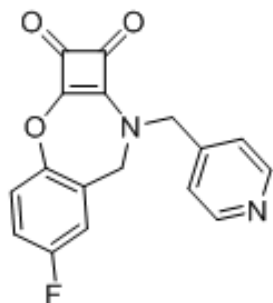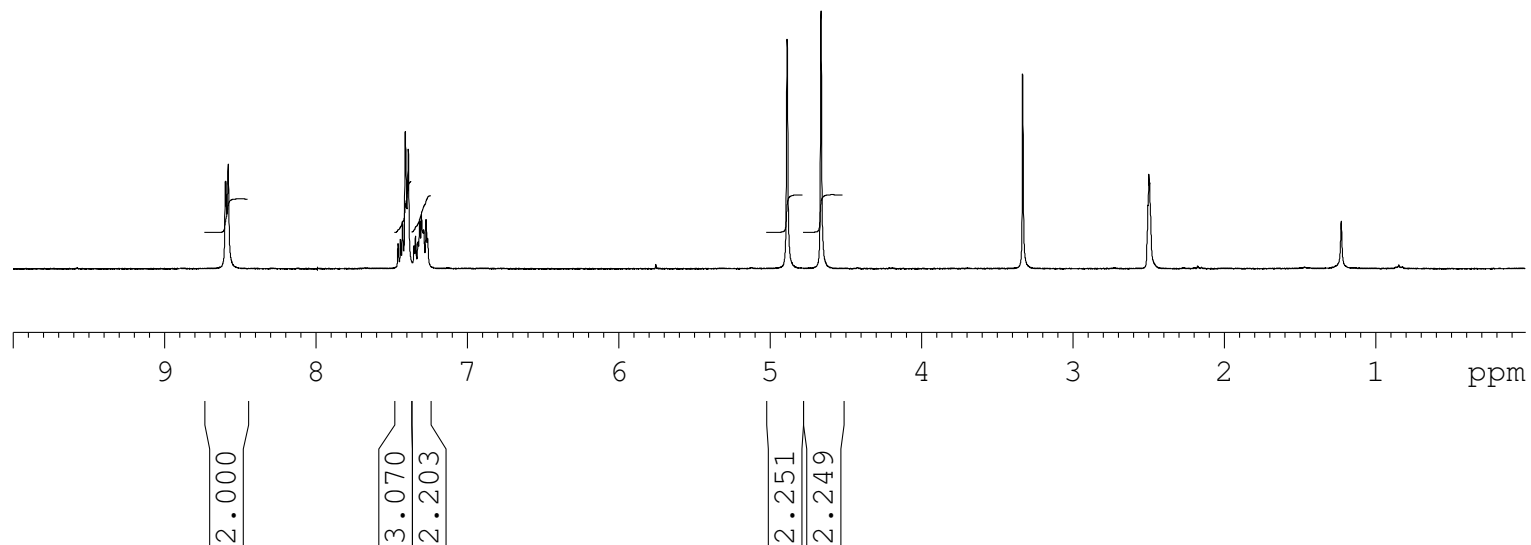

Current Data Parameters

NAME dc-3-134-101  
 EXPNO 1  
 PROCNO 1

F2 - Acquisition Parameters

Date\_ 20100604  
 Time 10.33  
 INSTRUM spect  
 PROBHD 5 mm QNP 1H/1  
 PULPROG zg  
 TD 32768  
 SOLVENT DMSO  
 NS 16  
 DS 0  
 SWH 4789.272 Hz  
 FIDRES 0.146157 Hz  
 AQ 3.4210291 sec  
 RG 645.1  
 DW 104.400 usec  
 DE 54.00 usec  
 TE 296.2 K  
 D1 1.00000000 sec  
 TD0 1

===== CHANNEL f1 =====

NUC1 1H  
 P1 9.75 usec  
 PL1 0.00 dB  
 SFO1 300.1324000 MHz

F2 - Processing parameters

SI 32768  
 SF 300.1300024 MHz  
 WDW no  
 SSB 0  
 LB 0.00 Hz  
 GB 0  
 PC 1.00

## Elemental Composition Report

### Multiple Mass Analysis: 2 mass(es) processed

Tolerance = 10.0 PPM / DBE: min = -1.5, max = 80.0

Selected filters: None

Monoisotopic Mass, Odd and Even Electron Ions

29 formula(e) evaluated with 1 results within limits (all results (up to 1000) for each mass)

Elements Used:

C: 0-17 H: 0-12 N: 0-2 O: 0-3 F: 0-1 Na: 0-1

File name: dc-3-134-101

Notebook Ref: 25561

IU Database#: 25561

Instrument: LCT KC366

Test name: Accurate Mass

15-Jun-2010 16:24:54

Method: ESI-TOF

Base Peak Mass: 311.08215332

dc-3-134-101 70 (1.753) AM (Cen,8, 90.00, Ar,5000.0,1222.14,0.70,LS 7); Sm (SG, 2x4.00); Cm (70:82)

1: TOF MS ES+  
9.04e3

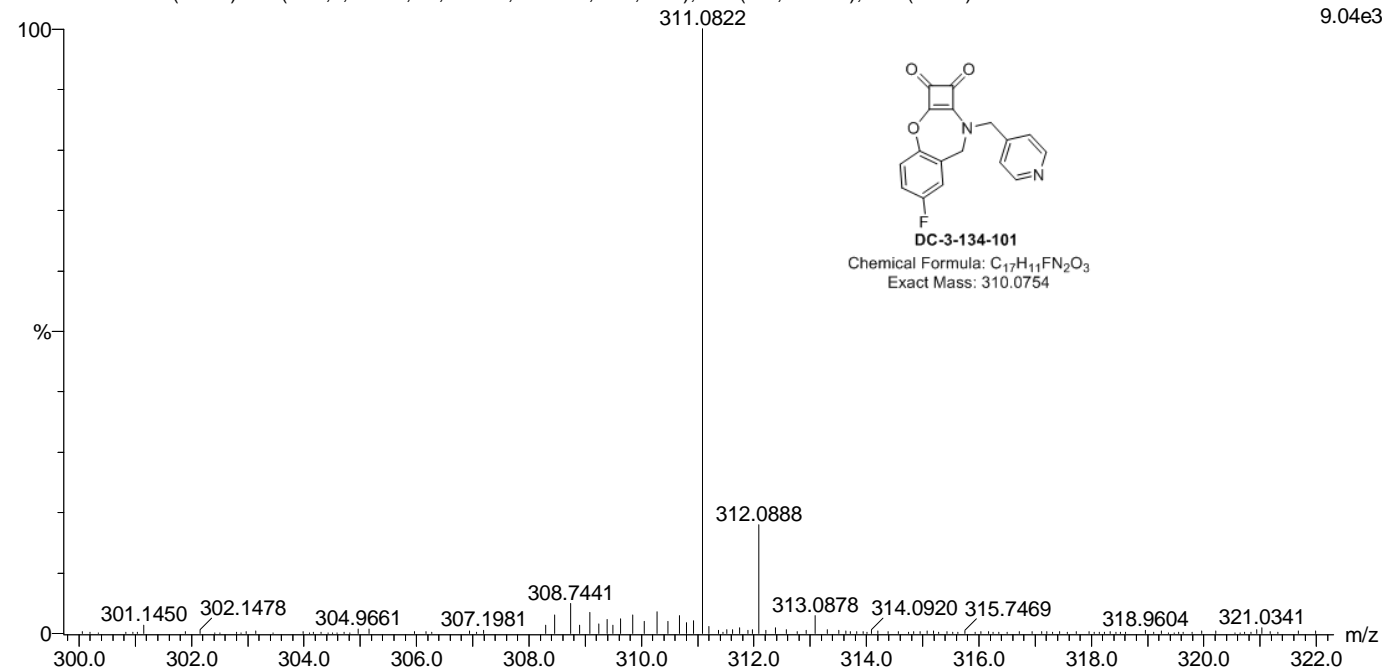

Minimum: 70.00  
 Maximum: 100.00

-1.5  
 80.0

| Mass     | RA     | Calc. Mass | mDa  | PPM  | DBE  | i-FIT | Formula         |
|----------|--------|------------|------|------|------|-------|-----------------|
| 311.0822 | 100.00 | 311.0832   | -1.0 | -3.2 | 12.5 | 12.2  | C17 H12 N2 O3 F |



Current Data Parameters  
 NAME dc-3-137-101  
 EXPNO 1  
 PROCNO 1

F2 - Acquisition Parameters  
 Date\_ 20100604  
 Time 10.28  
 INSTRUM spect  
 PROBHD 5 mm QNP 1H/1  
 PULPROG zg  
 TD 32768  
 SOLVENT DMSO  
 NS 16  
 DS 0  
 SWH 4789.272 Hz  
 FIDRES 0.146157 Hz  
 AQ 3.4210291 sec  
 RG 724.1  
 DW 104.400 usec  
 DE 54.00 usec  
 TE 296.2 K  
 D1 1.00000000 sec  
 TD0 1

===== CHANNEL f1 =====  
 NUC1 1H  
 P1 9.75 usec  
 PL1 0.00 dB  
 SFO1 300.1324000 MHz

F2 - Processing parameters  
 SI 32768  
 SF 300.1300024 MHz  
 WDW no  
 SSB 0  
 LB 0.00 Hz  
 GB 0  
 PC 1.00

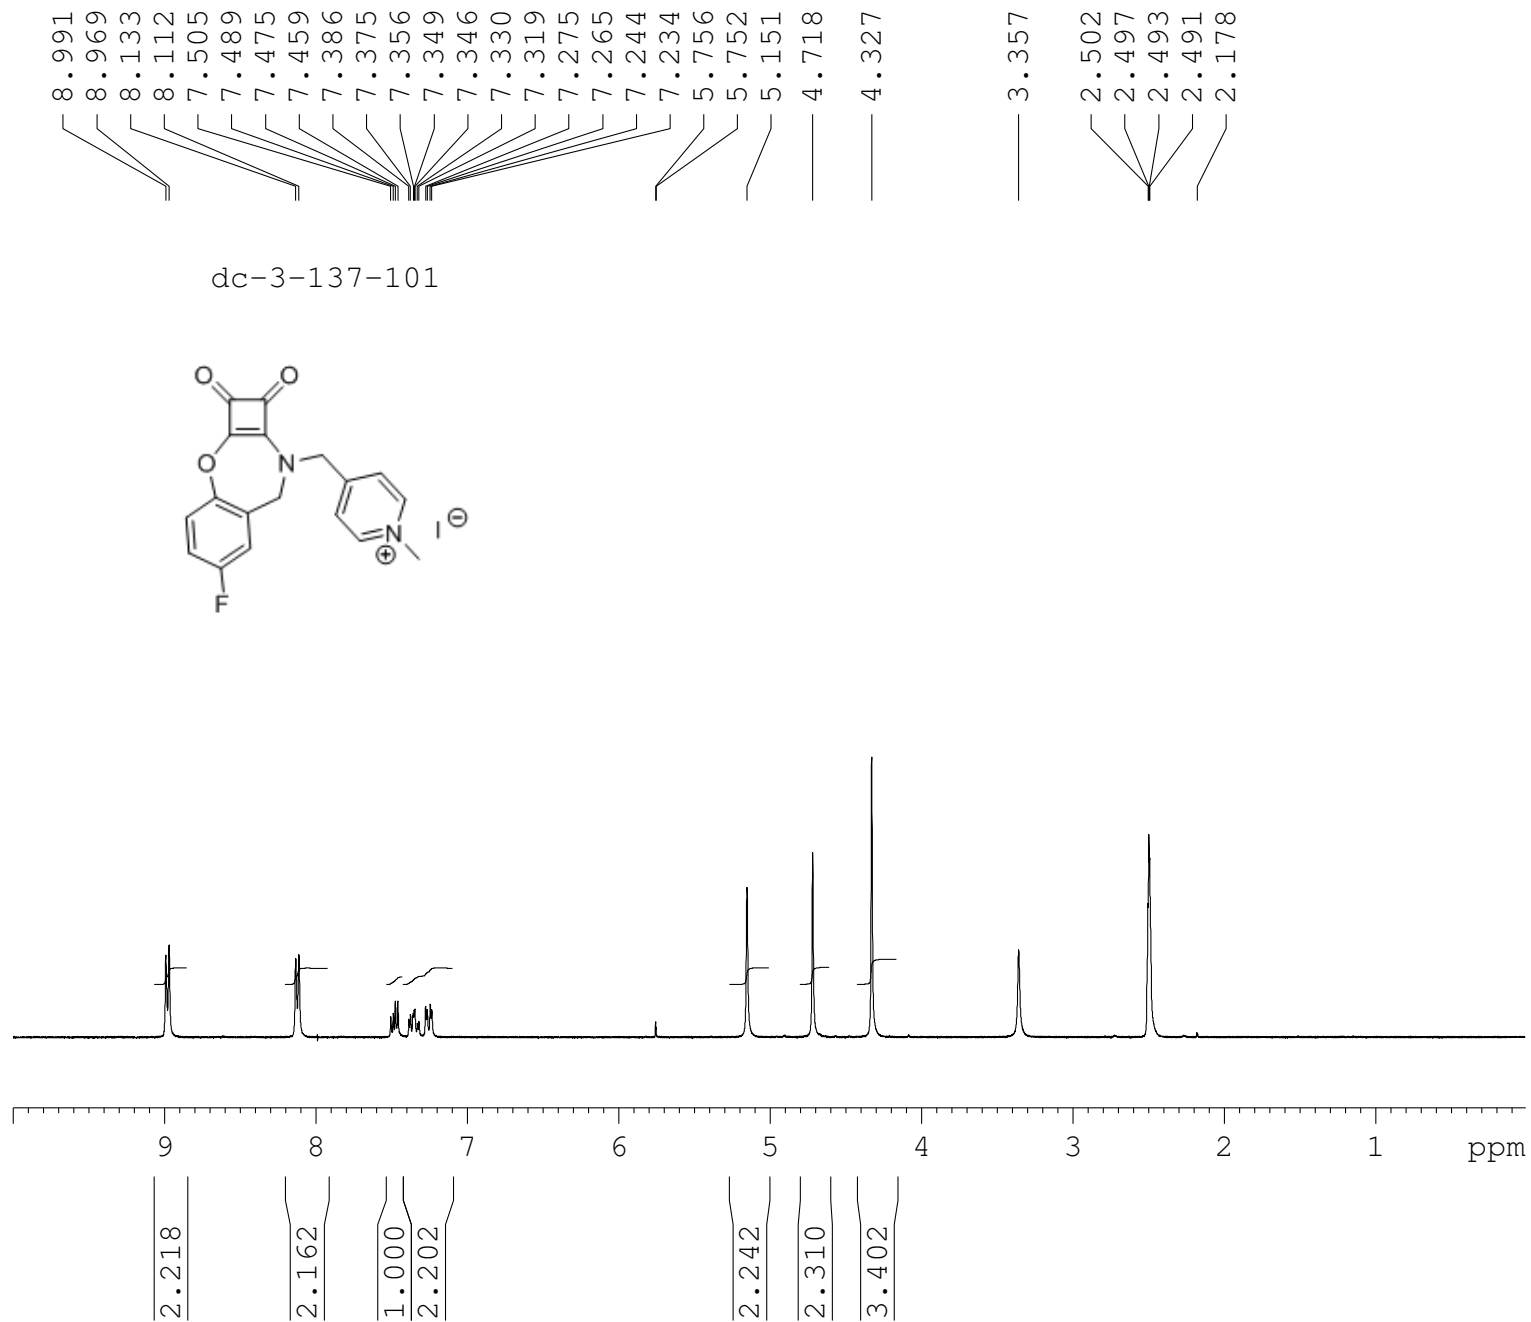

188.327  
 181.085  
 175.319  
 173.723  
 159.471  
 156.255  
 155.048  
 150.815  
 150.782  
 145.680  
 126.020  
 125.622  
 125.515  
 122.593  
 122.478  
 118.584  
 118.258  
 117.467  
 117.160

DC-3-137-carbon-2

53.021  
 52.711  
 47.720  
 40.487  
 40.208  
 39.929  
 39.651  
 39.374  
 39.096  
 38.818

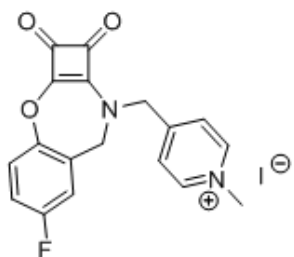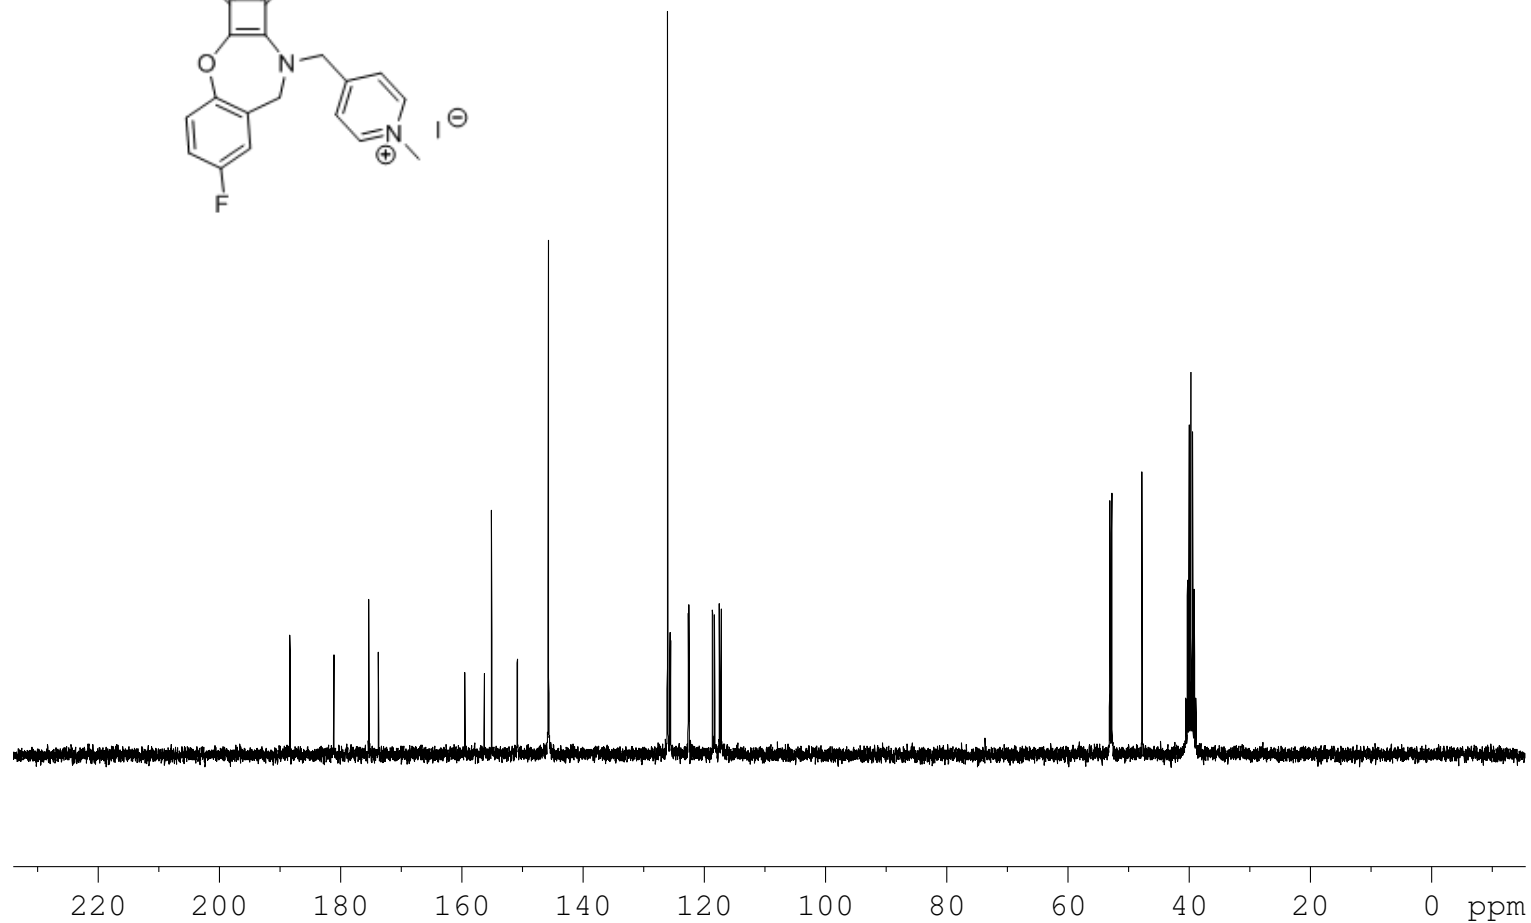

Current Data Parameters  
 NAME DC-3-137-carbon-  
 EXPNO 1  
 PROCNO 1

F2 - Acquisition Parameters  
 Date\_ 20100730  
 Time 15.48  
 INSTRUM spect  
 PROBHD 5 mm QNP 1H/1  
 PULPROG zgdc  
 TD 65536  
 SOLVENT DMSO  
 NS 250  
 DS 0  
 SWH 18832.393 Hz  
 FIDRES 0.287360 Hz  
 AQ 1.7400308 sec  
 RG 3251  
 DW 26.550 usec  
 DE 6.00 usec  
 TE 295.2 K  
 D1 1.00000000 sec  
 d11 0.03000000 sec  
 TD0 1

==== CHANNEL f1 ====  
 NUC1 13C  
 P1 11.80 usec  
 PL1 0.00 dB  
 SFO1 75.4760200 MHz

==== CHANNEL f2 ====  
 CPDPRG2 waltz16  
 NUC2 1H  
 PCPD2 95.00 usec  
 PL2 0.00 dB  
 PL12 18.00 dB  
 SFO2 300.1312005 MHz

# Elemental Composition Report

Tolerance = 50.0 PPM / DBE: min = -1.5, max = 80.0

Selected filters: None

Monoisotopic Mass, Even Electron Ions

29 formula(e) evaluated with 1 results within limits (all results (up to 1000) for each mass)

Elements Used:

C: 0-18 H: 0-14 N: 0-2 O: 0-3 F: 0-1 Na: 0-1

File name: dc-3-137-101

Instrument: LCT KC366

Method: ESI-TOF

dc-3-137-101-rerun5 42 (1.053) AM (Cen.8, 90.00, Ar,5000.0,922.36,0.70,LS 7); Sm (SG, 2x4.00); Cm (42)

Notebook Ref: 25562

Test name: Accurate Mass

Base Peak Mass: 325.09957886

IU Database#: 25562

15-Jun-2010 17:19:02

1: TOF MS ES+  
614

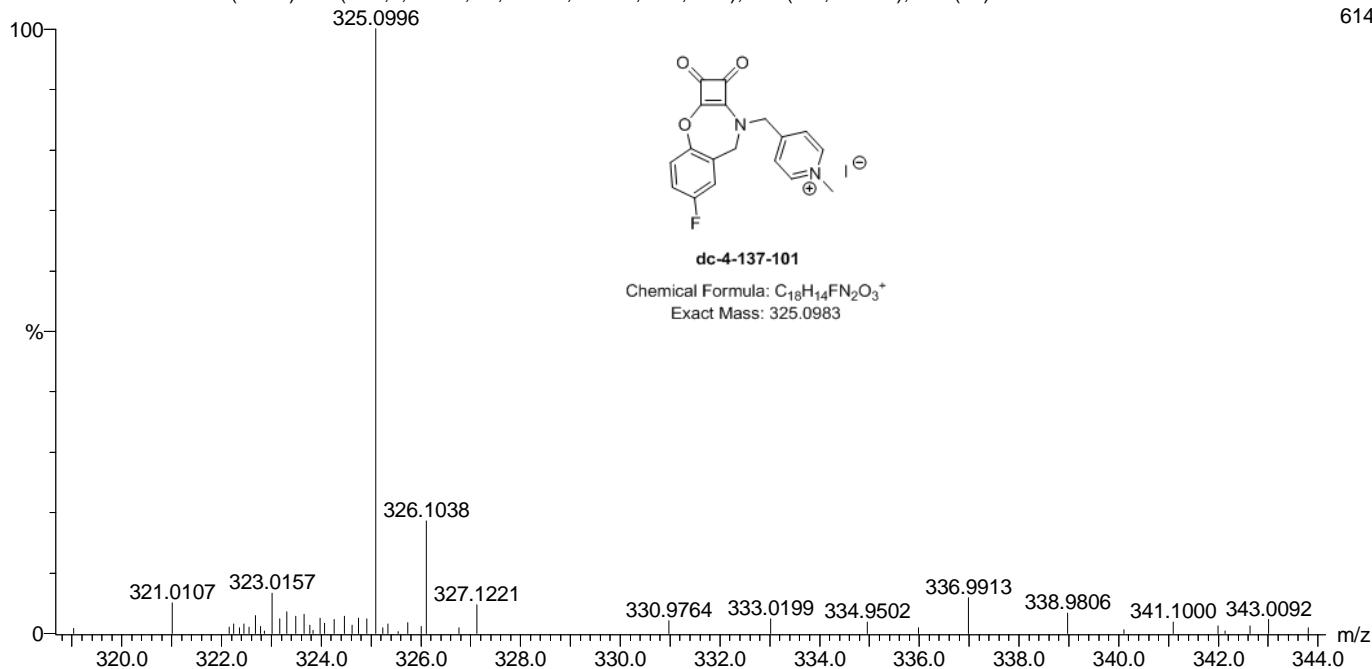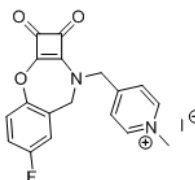

dc-4-137-101

Chemical Formula: C<sub>18</sub>H<sub>14</sub>FN<sub>2</sub>O<sub>3</sub><sup>+</sup>  
 Exact Mass: 325.0983

| Mass     | RA     | Calc. Mass | mDa | PPM | DBE  | i-FIT | Formula         |
|----------|--------|------------|-----|-----|------|-------|-----------------|
| 325.0996 | 100.00 | 325.0988   | 0.8 | 2.5 | 12.5 | 3.7   | C18 H14 N2 O3 F |

8.616  
 8.600  
 7.274  
 7.270  
 7.252  
 7.234  
 6.838  
 6.828  
 6.809  
 6.800  
 6.793  
 6.774  
 6.764  
 6.566  
 6.560  
 6.538  
 6.532  
 5.309  
 5.305

4.039  
 3.855

dc-4-23-101

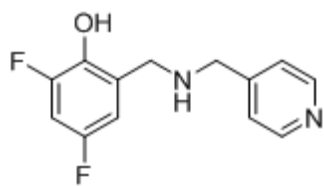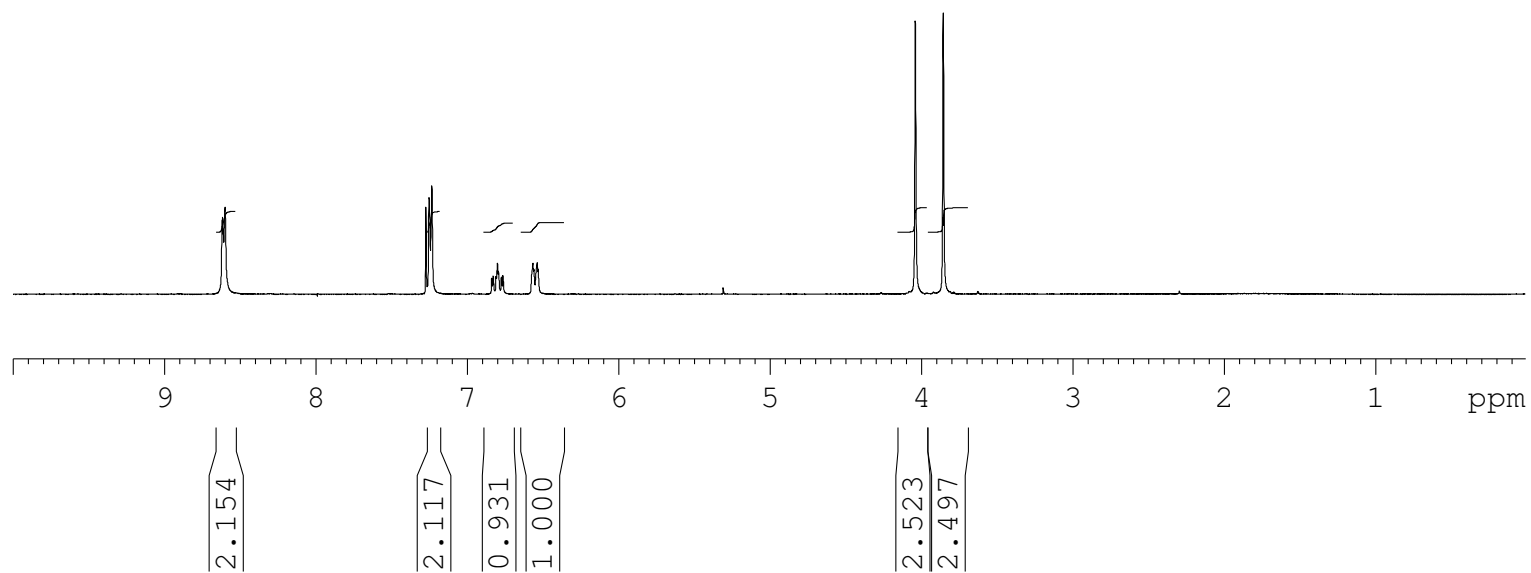

Current Data Parameters  
 NAME dc-4-23-101  
 EXPNO 1  
 PROCNO 1

F2 - Acquisition Parameters  
 Date\_ 20100628  
 Time 11.43  
 INSTRUM spect  
 PROBHD 5 mm QNP 1H/1  
 PULPROG zg  
 TD 32768  
 SOLVENT CDCl3  
 NS 8  
 DS 0  
 SWH 4789.272 Hz  
 FIDRES 0.146157 Hz  
 AQ 3.4210291 sec  
 RG 362  
 DW 104.400 usec  
 DE 54.00 usec  
 TE 296.2 K  
 D1 1.00000000 sec  
 TD0 1

==== CHANNEL f1 ====  
 NUC1 1H  
 P1 9.75 usec  
 PL1 0.00 dB  
 SFO1 300.1324000 MHz

F2 - Processing parameters  
 SI 32768  
 SF 300.1300024 MHz  
 WDW no  
 SSB 0  
 LB 0.00 Hz  
 GB 0  
 PC 1.00

8.705  
 8.686  
 7.273  
 7.254  
 7.234  
 7.076  
 7.066  
 7.050  
 7.044  
 7.034  
 7.018  
 7.008  
 6.641  
 6.633  
 6.624  
 6.614  
 6.605  
 6.597  
 5.312  
 4.943  
 4.399

1.593

dc-4-25-101

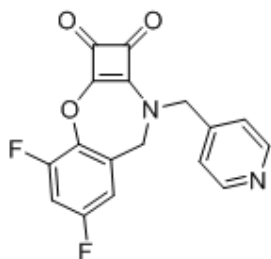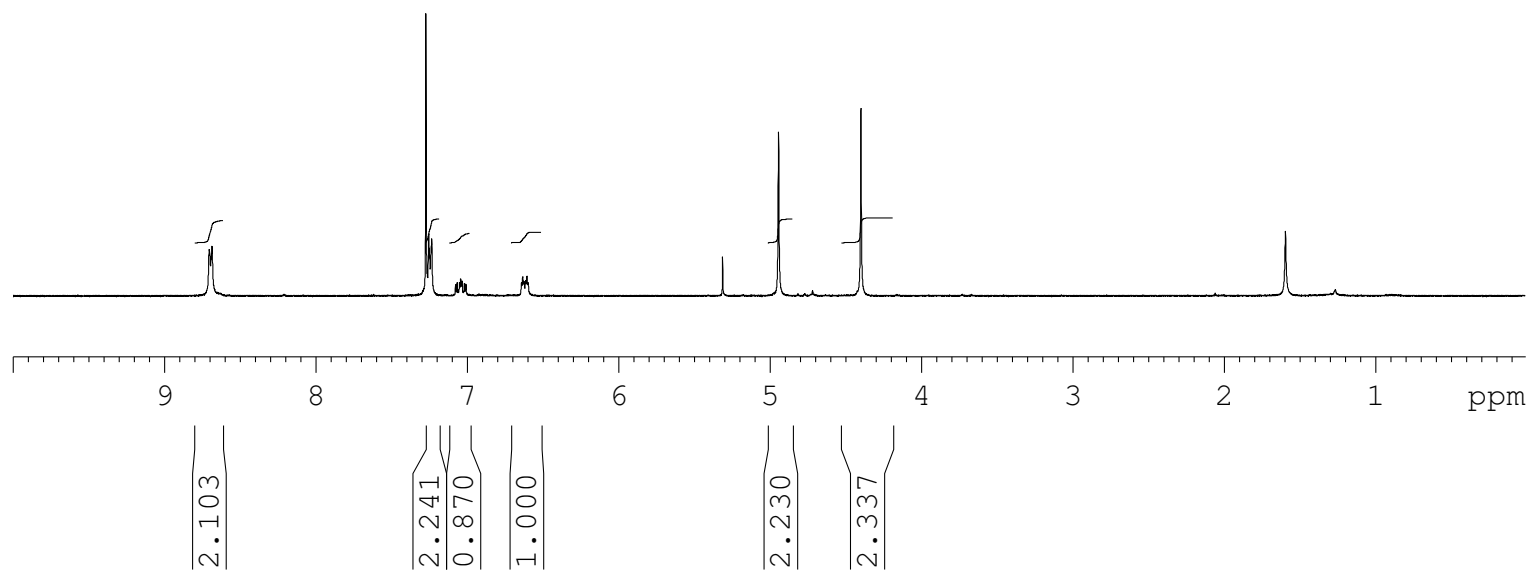

Current Data Parameters  
 NAME dc-4-25-101  
 EXPNO 1  
 PROCNO 1

F2 - Acquisition Parameters  
 Date\_ 20100629  
 Time 15.46  
 INSTRUM spect  
 PROBHD 5 mm QNP 1H/1  
 PULPROG zg  
 TD 32768  
 SOLVENT CDCl3  
 NS 16  
 DS 0  
 SWH 4789.272 Hz  
 FIDRES 0.146157 Hz  
 AQ 3.4210291 sec  
 RG 1149.4  
 DW 104.400 usec  
 DE 54.00 usec  
 TE 295.2 K  
 D1 1.00000000 sec  
 TD0 1

==== CHANNEL f1 ====  
 NUC1 1H  
 P1 9.75 usec  
 PL1 0.00 dB  
 SFO1 300.1324000 MHz

F2 - Processing parameters  
 SI 32768  
 SF 300.1300024 MHz  
 WDW no  
 SSB 0  
 LB 0.00 Hz  
 GB 0  
 PC 1.00

# Elemental Composition Report

Tolerance = 100.0 PPM / DBE: min = -1.5, max = 80.0

Selected filters: None

Monoisotopic Mass, Even Electron Ions

28 formula(e) evaluated with 1 results within limits (all results (up to 1000) for each mass)

Elements Used:

C: 0-17 H: 0-11 N: 0-2 O: 0-3 F: 0-2

File name: dc-4-25-101

Instrument: LCT KC366

Method: ESI-TOF

dc-4-25-101 115 (2.887) AM (Cen,8, 80.00, Ar,5000.0,1222.14,0.70,LS 7); Sm (SG, 2x4.00); Cm (115:117)

Notebook Ref: 25942

Test name: Accurate Mass

Base Peak Mass: 329.0736943

IU Database#: 25942

09-Jul-2010 14:37:47

1: TOF MS ES+  
453

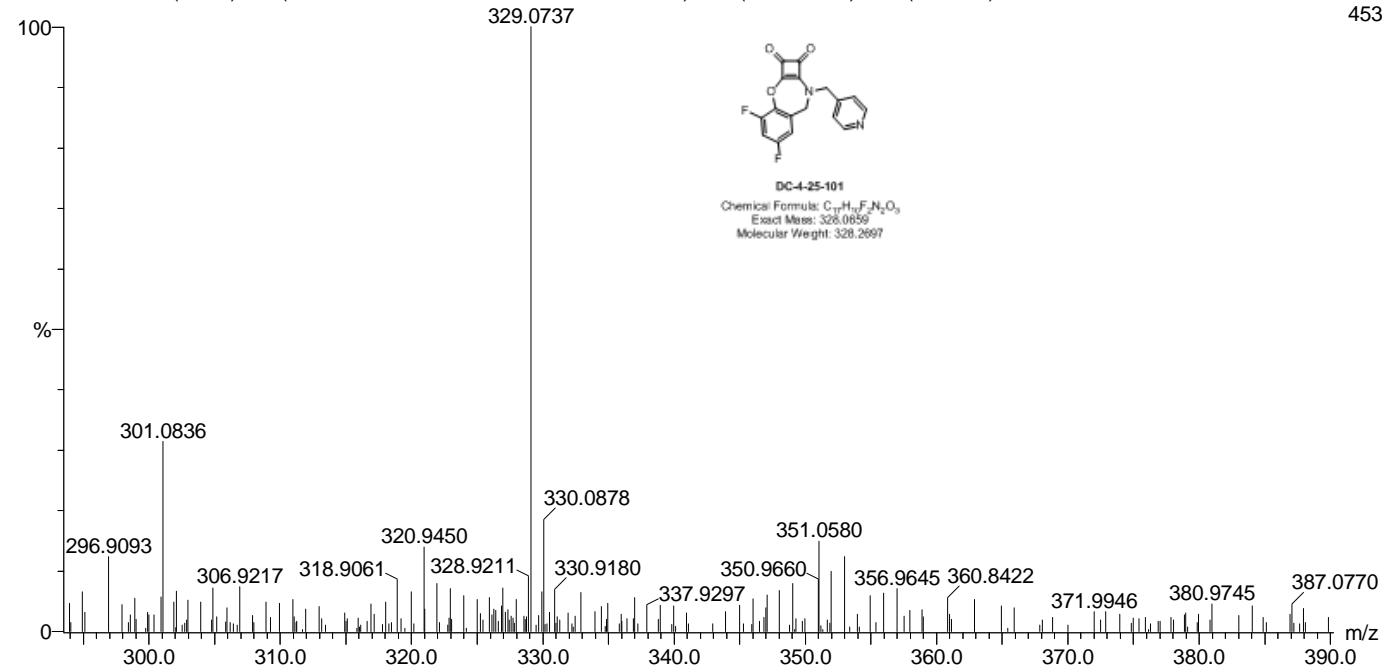

Minimum: 60.00 -1.5  
 Maximum: 100.00 5.0 100.0 80.0

| Mass     | RA     | Calc. Mass | mDa  | PPM  | DBE  | i-FIT | Formula             |
|----------|--------|------------|------|------|------|-------|---------------------|
| 329.0737 | 100.00 | 329.0738   | -0.1 | -0.3 | 12.5 | 0.7   | C17 H11 N2 O3<br>F2 |

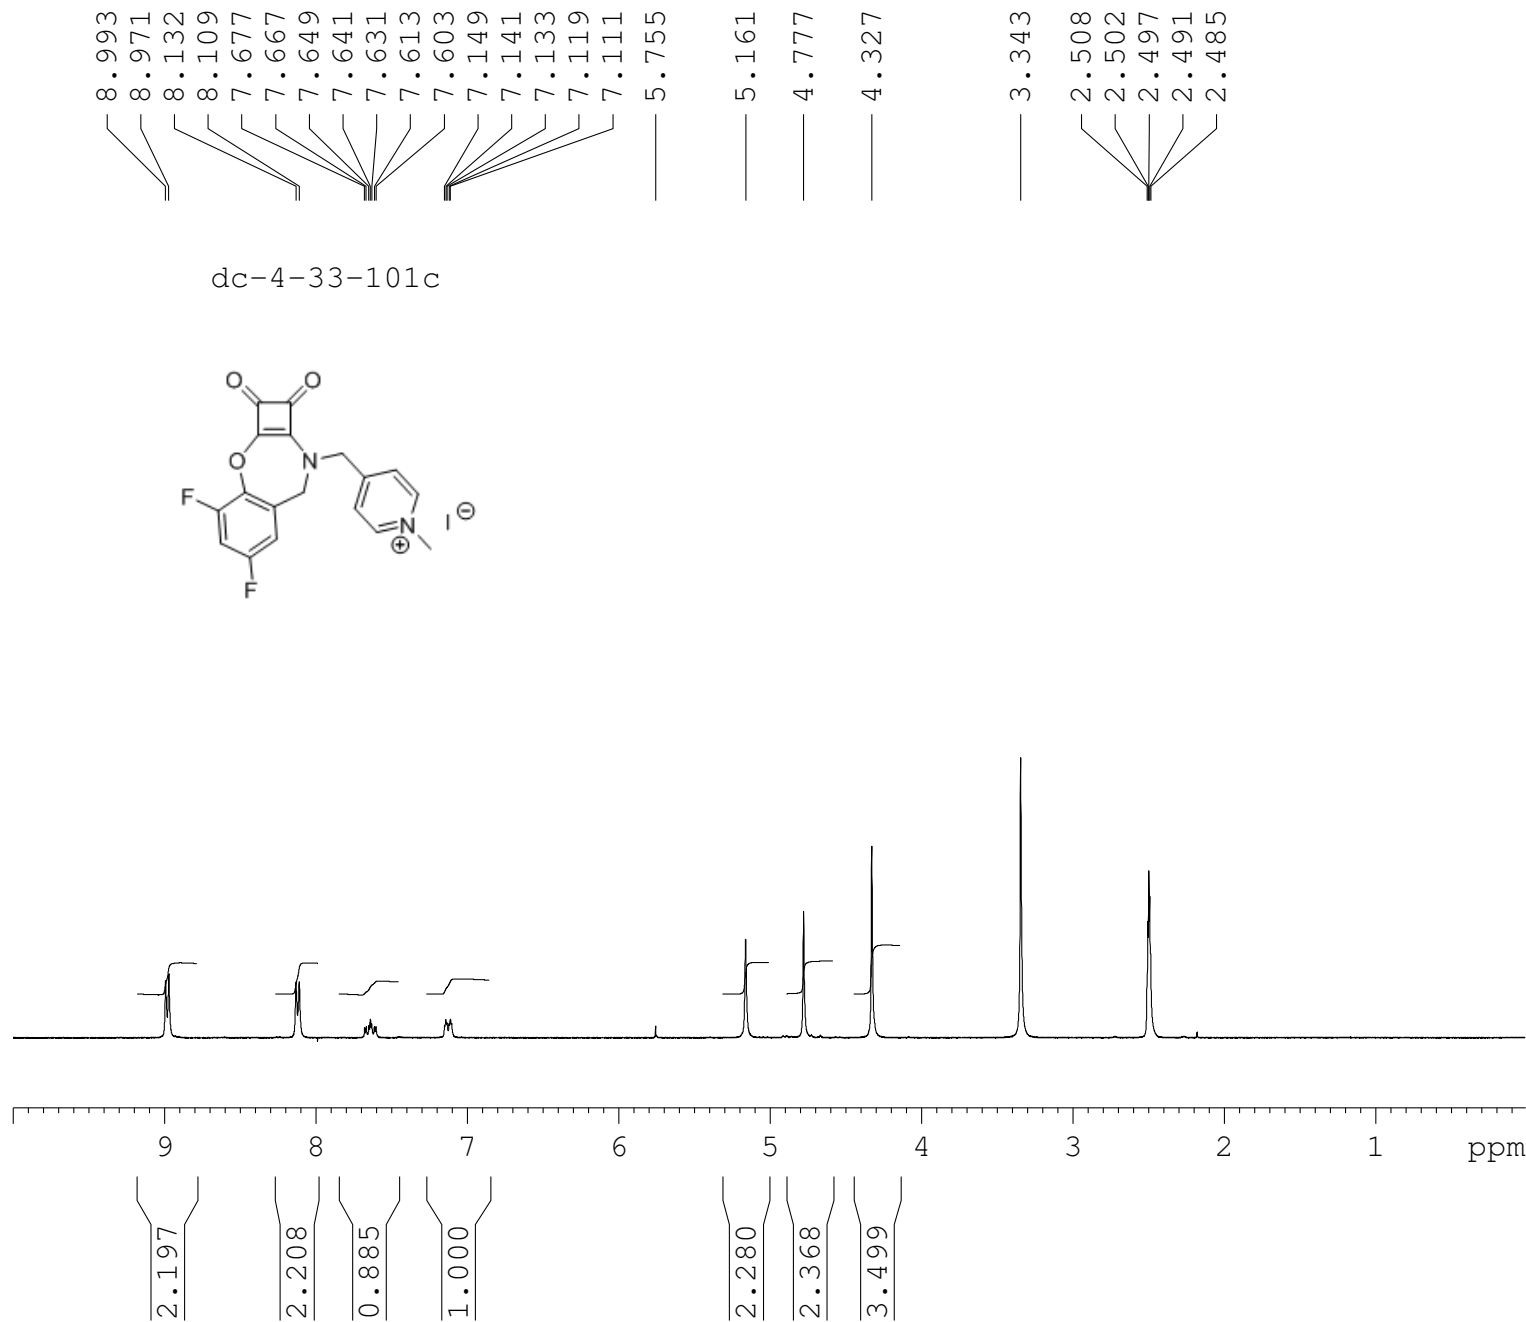

Current Data Parameters  
 NAME dc-4-33-101c  
 EXPNO 1  
 PROCNO 1

F2 - Acquisition Parameters  
 Date\_ 20100709  
 Time 10.49  
 INSTRUM spect  
 PROBHD 5 mm QNP 1H/1  
 PULPROG zg  
 TD 32768  
 SOLVENT D2O  
 NS 32  
 DS 0  
 SWH 4789.272 Hz  
 FIDRES 0.146157 Hz  
 AQ 3.4210291 sec  
 RG 1024  
 DW 104.400 usec  
 DE 54.00 usec  
 TE 296.2 K  
 D1 1.00000000 sec  
 TD0 1

==== CHANNEL f1 ====  
 NUC1 1H  
 P1 9.75 usec  
 PL1 0.00 dB  
 SFO1 300.1324000 MHz

F2 - Processing parameters  
 SI 32768  
 SF 300.1300024 MHz  
 WDW no  
 SSB 0  
 LB 0.00 Hz  
 GB 0  
 PC 1.00

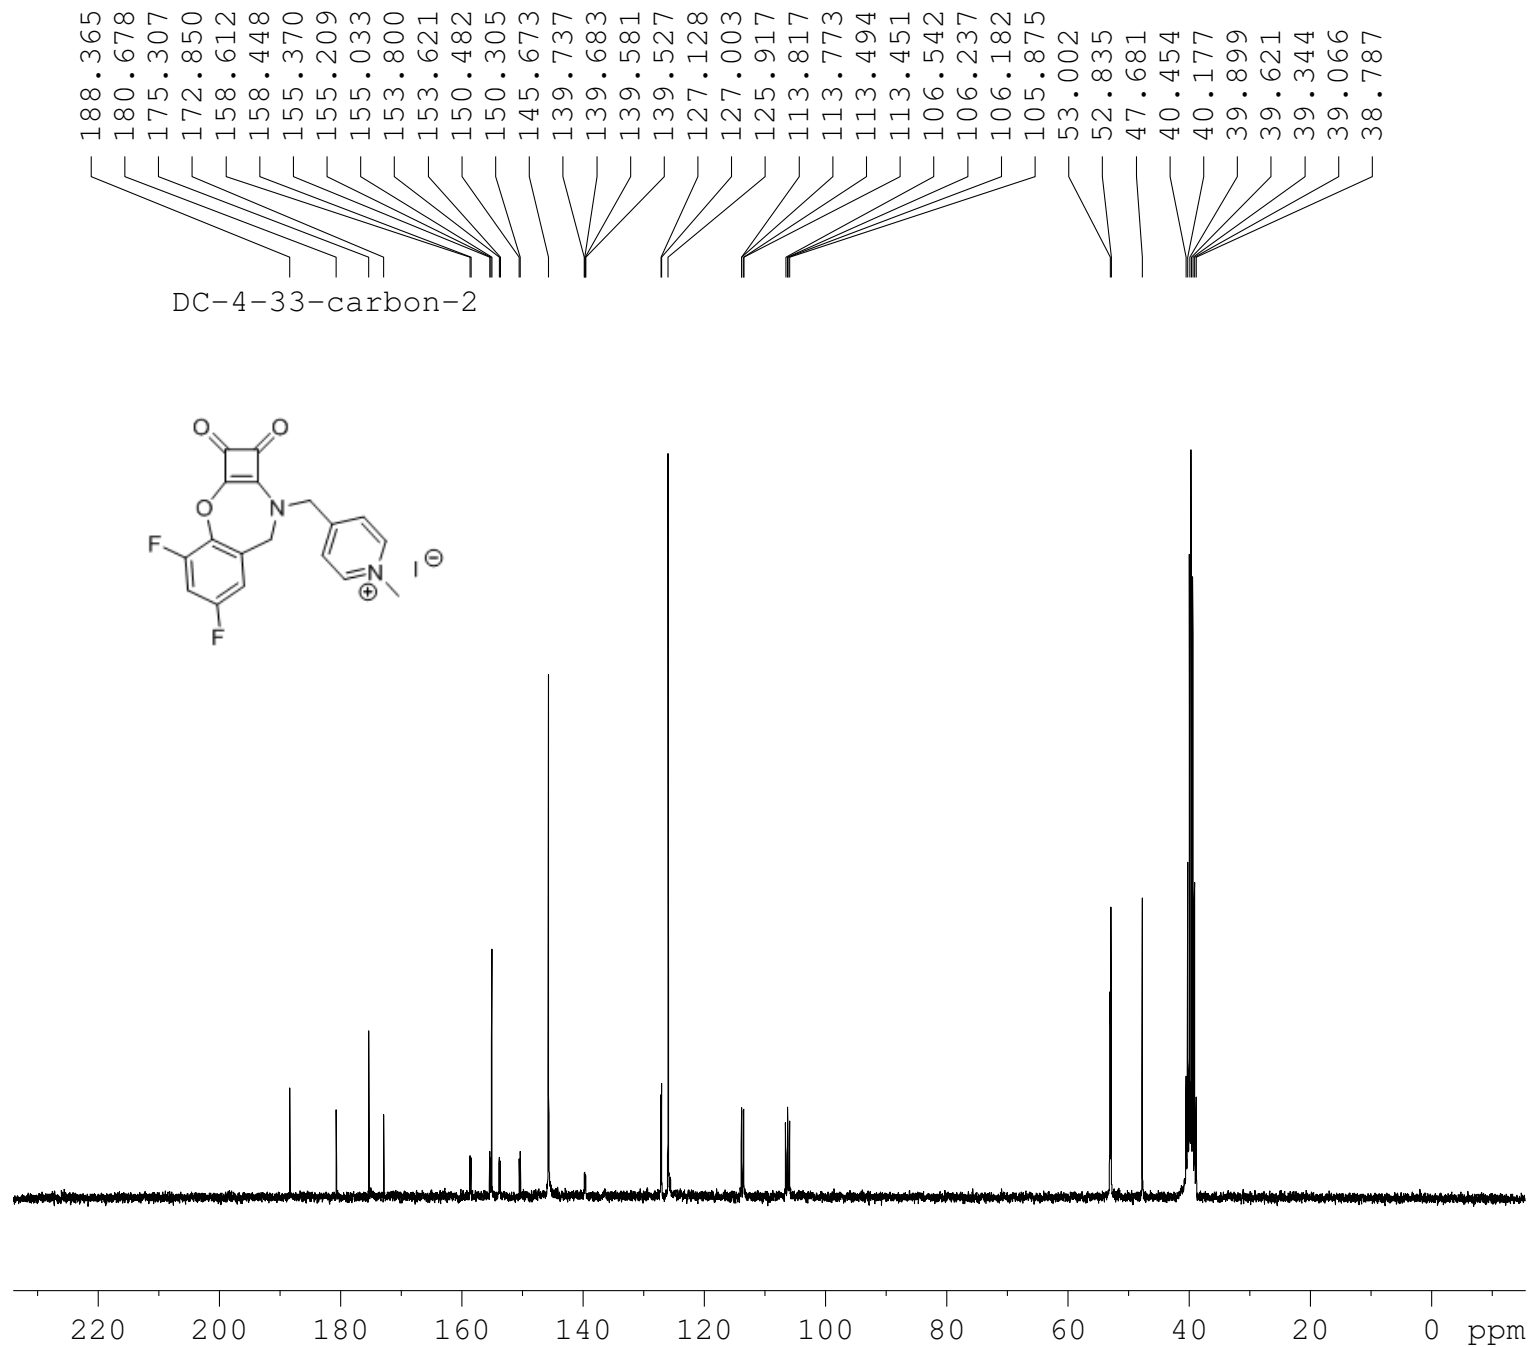

Current Data Parameters  
 NAME DC-4-33-carbon-2  
 EXPNO 1  
 PROCNO 1

F2 - Acquisition Parameters  
 Date\_ 20100731  
 Time 17.53  
 INSTRUM spect  
 PROBHD 5 mm QNP 1H/1  
 PULPROG zgdc  
 TD 65536  
 SOLVENT DMSO  
 NS 2400  
 DS 0  
 SWH 18832.393 Hz  
 FIDRES 0.287360 Hz  
 AQ 1.7400308 sec  
 RG 5792.6  
 DW 26.550 usec  
 DE 6.00 usec  
 TE 295.2 K  
 D1 1.00000000 sec  
 d11 0.03000000 sec  
 TD0 1

==== CHANNEL f1 ====  
 NUC1 13C  
 P1 11.80 usec  
 PL1 0.00 dB  
 SFO1 75.4760200 MHz

==== CHANNEL f2 ====  
 CPDPRG2 waltz16  
 NUC2 1H  
 PCPD2 95.00 usec  
 PL2 0.00 dB  
 PL12 18.00 dB  
 SFO2 300.1312005 MHz



# Elemental Composition Report

## Multiple Mass Analysis: 2 mass(es) processed

Tolerance = 5.0 PPM / DBE: min = -1.5, max = 80.0

Selected filters: None

Monoisotopic Mass, Odd and Even Electron Ions

28 formula(e) evaluated with 1 results within limits (all results (up to 1000) for each mass)

Elements Used:

C: 0-18 H: 0-13 N: 0-2 O: 0-3 F: 0-2

File name: dc-4-33-101

Instrument: LCT KC366

Method: ESI-TOF

dc-4-33-101b 30 (0.752) AM (Cen,8, 80.00, Ar,5000.0,1222.14,0.70,LS 6); Sm (SG, 2x6.00); Cm (29:30)

Notebook Ref: 26284

Test name: Accurate Mass

Base Peak Mass: 343.09027100

IU Database#: 26284

30-Jul-2010 12:34:30

1: TOF MS ES+  
1.52e3

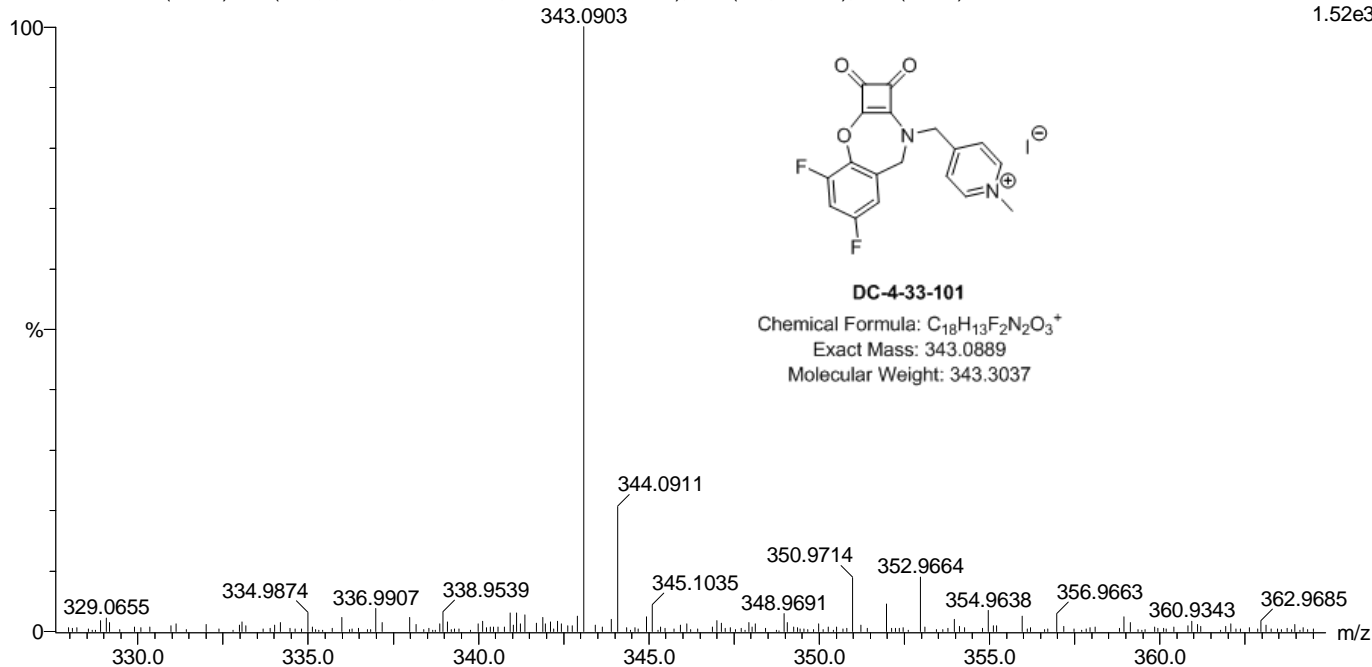

Minimum: 50.00  
 Maximum: 100.00

-1.5  
 80.0

| Mass     | RA     | Calc. Mass | mDa | PPM | DBE  | i-FIT | Formula             |
|----------|--------|------------|-----|-----|------|-------|---------------------|
| 343.0903 | 100.00 | 343.0894   | 0.9 | 2.6 | 12.5 | 4.6   | C18 H13 N2 O3<br>F2 |

7.266  
6.765  
6.758  
6.743  
6.736  
6.724  
6.645  
6.634  
6.626  
6.612  
6.604  
4.063  
4.048  
4.030  
3.824  
3.807  
3.791  
3.743  
3.737  
3.730  
3.726  
3.724  
3.718  
3.708  
3.689  
3.679  
3.670  
3.667  
3.660  
3.654  
3.645  
3.636  
3.586  
3.561  
3.552  
3.543  
3.531  
3.459  
3.373  
3.294

DC-2-46-101

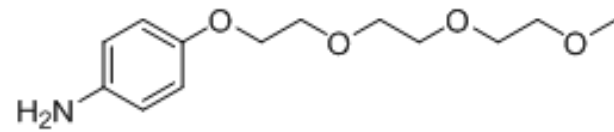

DC-2-46-101

Current Data Parameters  
NAME DC-2-46-101  
EXPNO 1  
PROCNO 1

F2 - Acquisition Parameters  
Date\_ 20100211  
Time 10.11  
INSTRUM spect  
PROBHD 5 mm QNP 1H/1  
PULPROG zg  
TD 32768  
SOLVENT CDC13  
NS 16  
DS 0  
SWH 3591.954 Hz  
FIDRES 0.109618 Hz  
AQ 4.5613556 sec  
RG 90.5  
DW 139.200 usec  
DE 54.00 usec  
TE 298.2 K  
D1 1.00000000 sec  
TD0 1

==== CHANNEL f1 =====  
NUC1 1H  
P1 9.75 usec  
PL1 0.00 dB  
SFO1 300.1315007 MHz

F2 - Processing parameters  
SI 32768  
SF 300.1300042 MHz  
WDW no  
SSB 0  
LB 0.00 Hz  
GB 0  
PC 1.00

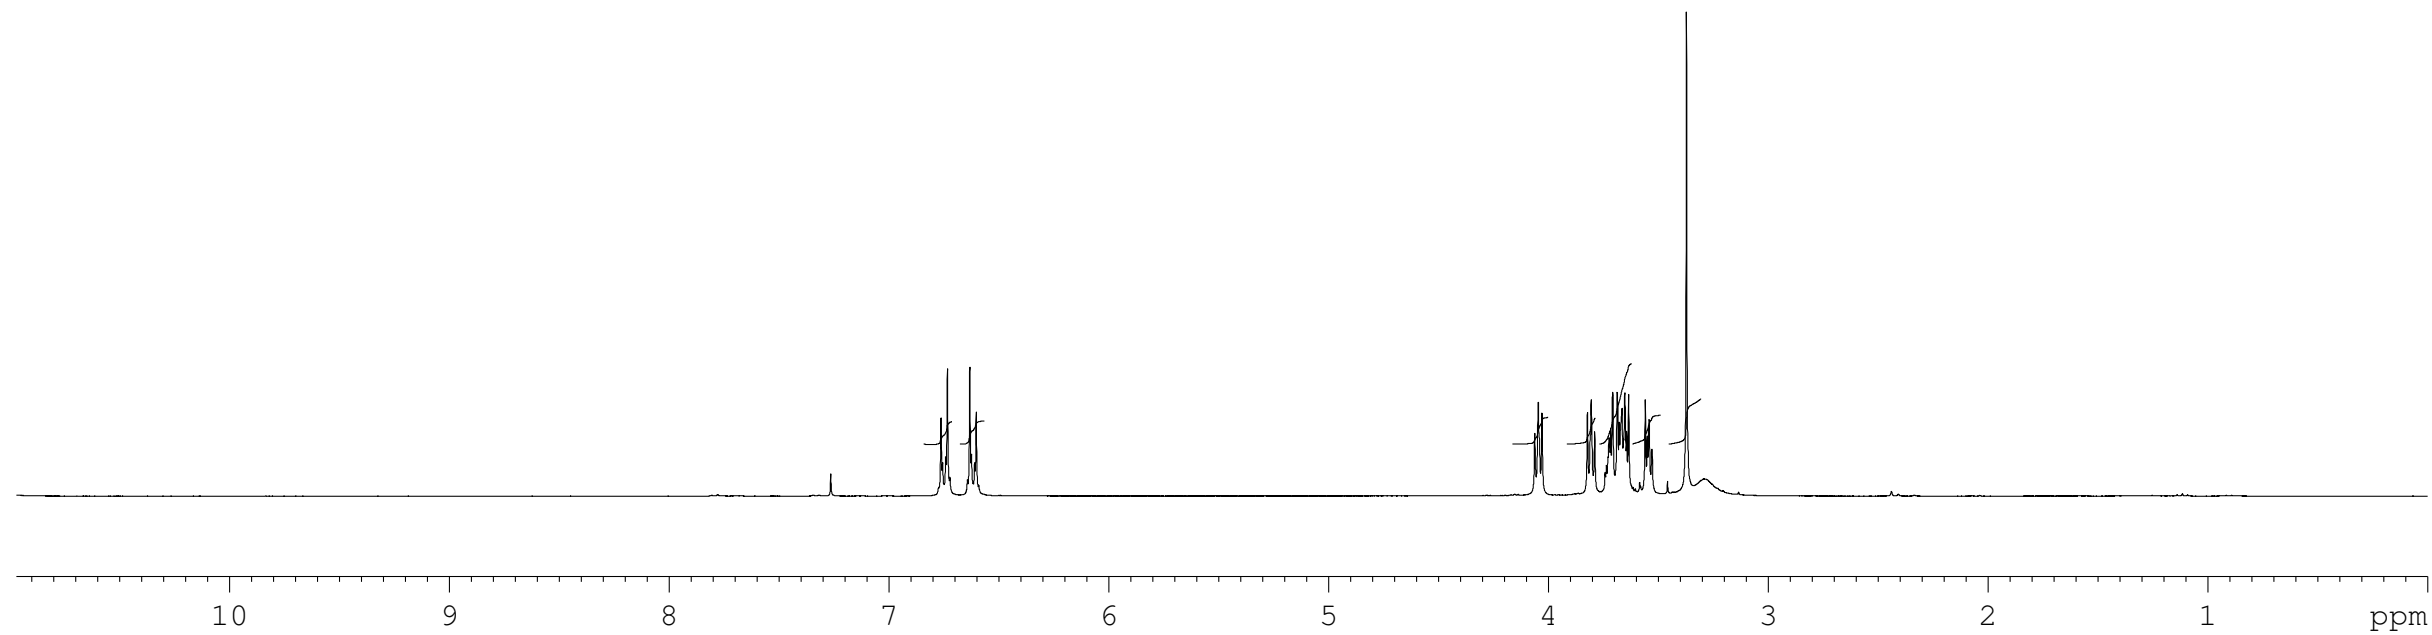

1.943  
2.000

2.306  
2.287  
6.957  
2.505  
3.925

# Elemental Composition Report

Tolerance = 15.0 PPM / DBE: min = -1.5, max = 80.0

Selected filters: None

Monoisotopic Mass, Even Electron Ions

25 formula(e) evaluated with 1 results within limits (all results (up to 1000) for each mass)

Elements Used:

C: 0-24 H: 0-26 N: 0-1 O: 0-7 Na: 0-1

File name: dc-2-59-101

Instrument: LCT KC366

Method: ESI-TOF

dc-2-59-101 23 (0.586) AM (Cen,6, 90.00, Ar,6000.0,1222.14,0.70,LS 4); Sm (SG, 2x6.00); Cm (23)

Notebook Ref:

Test name: Accurate Mass

Base Peak Mass: 440.16995239

IU Database#:

26-Feb-2010 12:12:41

1: TOF MS ES+  
4.13e3

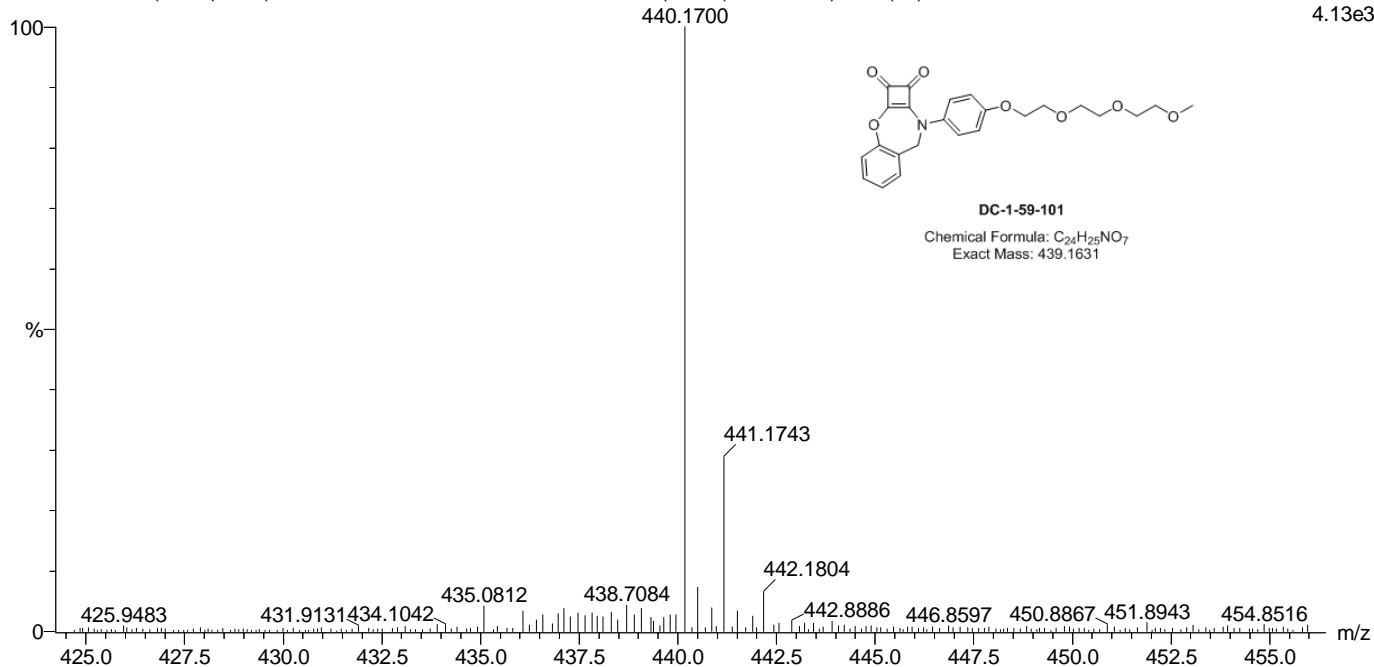

Minimum: 80.00  
 Maximum: 100.00

| Mass     | RA     | Calc. Mass | mDa  | PPM  | DBE  | i-FIT | Formula                                          |
|----------|--------|------------|------|------|------|-------|--------------------------------------------------|
| 440.1700 | 100.00 | 440.1709   | -0.9 | -2.0 | 12.5 | 5.8   | C <sub>24</sub> H <sub>26</sub> N O <sub>7</sub> |

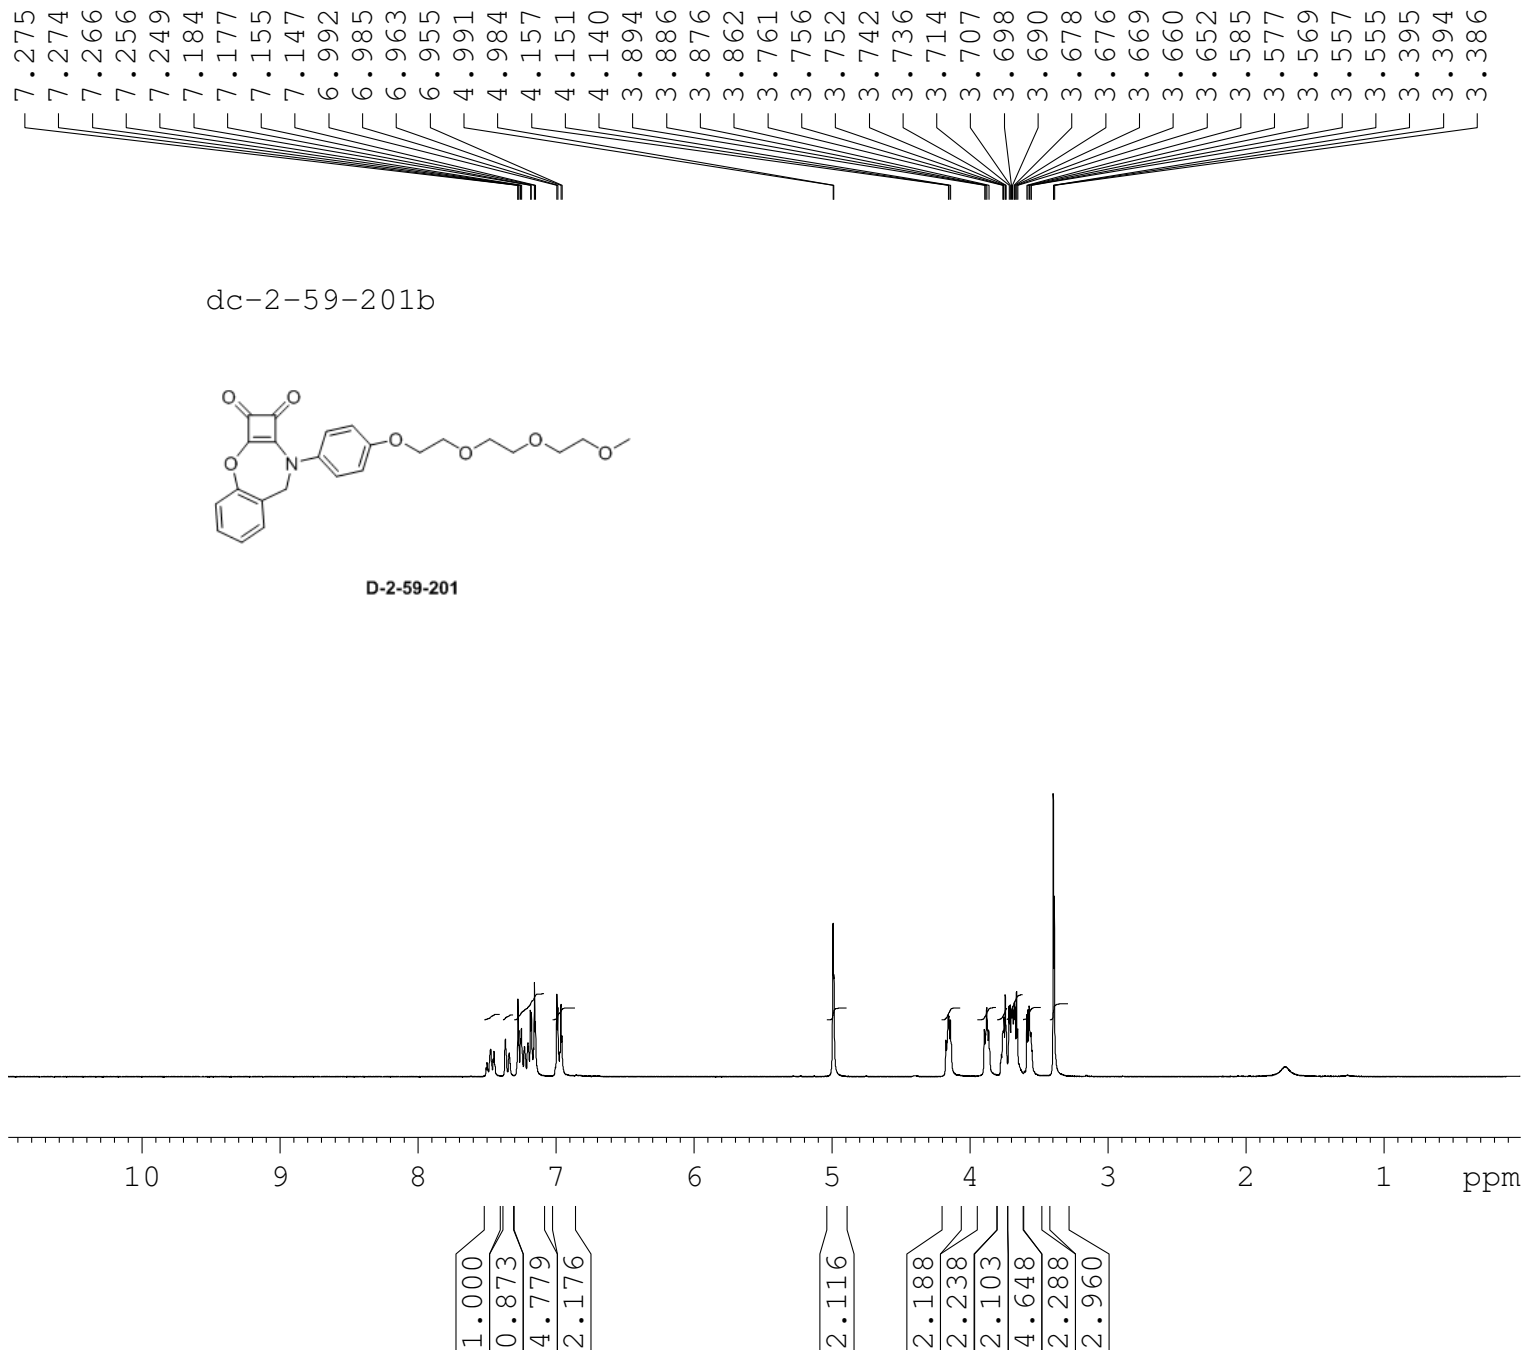

Current Data Parameters  
 NAME dc-2-59-201b  
 EXPNO 1  
 PROCNO 1

F2 - Acquisition Parameters  
 Date\_ 20100814  
 Time 10.50  
 INSTRUM spect  
 PROBHD 5 mm QNP 1H/1  
 PULPROG zg  
 TD 32768  
 SOLVENT CDC13  
 NS 8  
 DS 0  
 SWH 4789.272 Hz  
 FIDRES 0.146157 Hz  
 AQ 3.4210291 sec  
 RG 362  
 DW 104.400 usec  
 DE 54.00 usec  
 TE 294.2 K  
 D1 1.00000000 sec  
 TD0 1

==== CHANNEL f1 ====  
 NUC1 1H  
 P1 9.75 usec  
 PL1 0.00 dB  
 SFO1 300.1324000 MHz

F2 - Processing parameters  
 SI 32768  
 SF 300.1300024 MHz  
 WDW no  
 SSB 0  
 LB 0.00 Hz  
 GB 0  
 PC 1.00

DC-2-61-101b

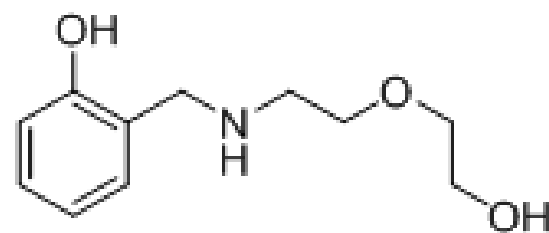

**DC-2-61-101b**

7.266  
7.187  
7.182  
7.160  
7.156  
7.135  
7.130  
6.993  
6.990  
6.970  
6.840  
6.836  
6.813  
6.809  
6.798  
6.794  
6.773  
6.769  
6.749  
6.745  
5.293  
4.002  
3.751  
3.745  
3.737  
3.732  
3.721  
3.692  
3.619  
3.603  
3.586  
3.576  
3.565  
3.561  
3.552  
3.547  
2.875  
2.858  
2.841

1.231

Current Data Parameters  
 NAME DC-2-61-101b  
 EXPNO 1  
 PROCNO 1

F2 - Acquisition Parameters  
 Date\_ 20100216  
 Time 14.13  
 INSTRUM spect  
 PROBHD 5 mm QNP 1H/1  
 PULPROG zg  
 TD 32768  
 SOLVENT DMSO  
 NS 16  
 DS 0  
 SWH 3591.954 Hz  
 FIDRES 0.109618 Hz  
 AQ 4.5613556 sec  
 RG 80.6  
 DW 139.200 usec  
 DE 54.00 usec  
 TE 299.2 K  
 D1 1.00000000 sec  
 TD0 1

==== CHANNEL f1 =====  
 NUC1 1H  
 P1 9.75 usec  
 PL1 0.00 dB  
 SFO1 300.1315007 MHz

F2 - Processing parameters  
 SI 32768  
 SF 300.1300042 MHz  
 WDW no  
 SSB 0  
 LB 0.00 Hz  
 GB 0  
 PC 1.00

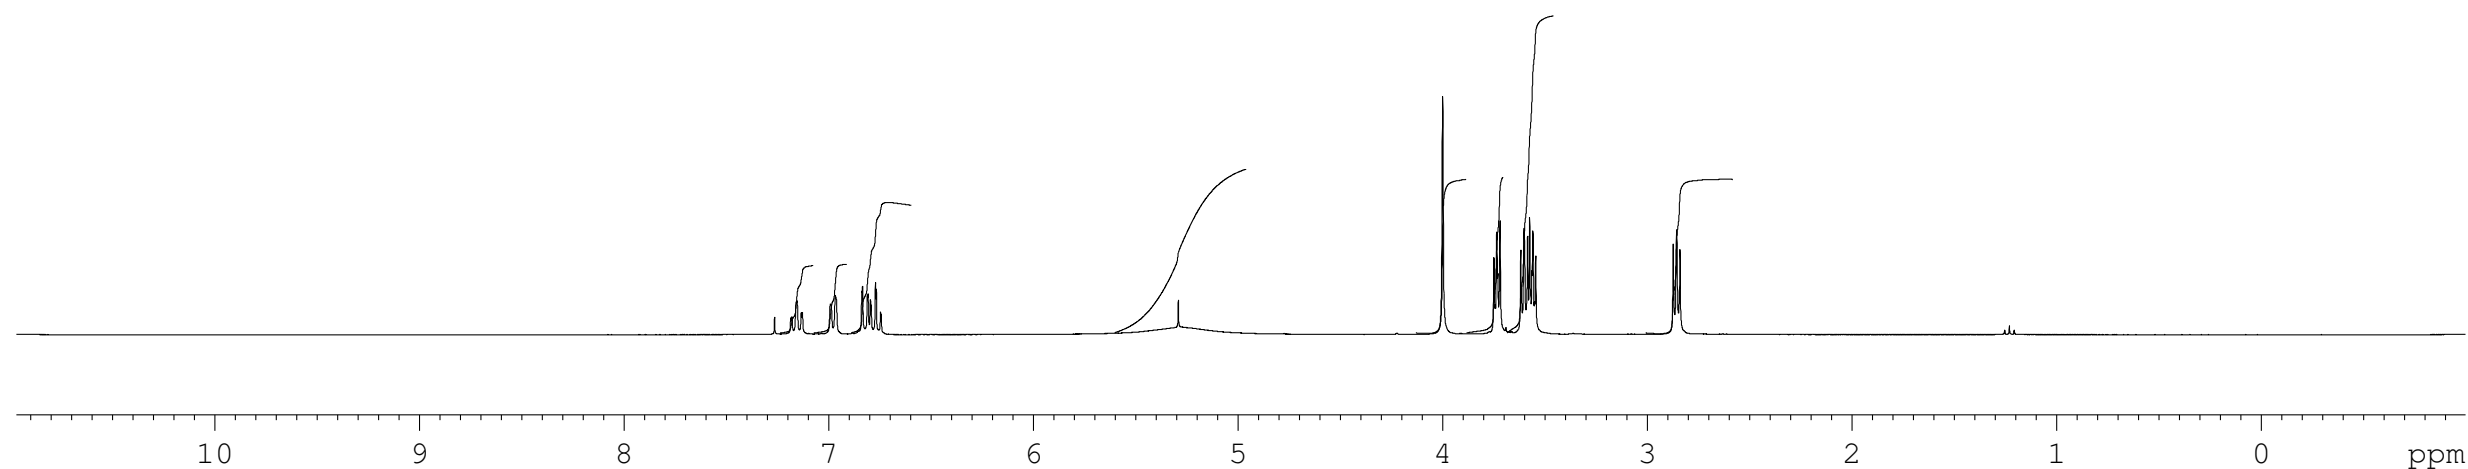

1.000  
1.020  
1.899  
2.435  
2.285  
2.322  
4.715  
2.283

dc-2-63-101-c1 #88-91 RT: 4.14-4.28 AV: 4 NL: 3.19E7  
T: + c CI Full ms [ 94.50-700.50]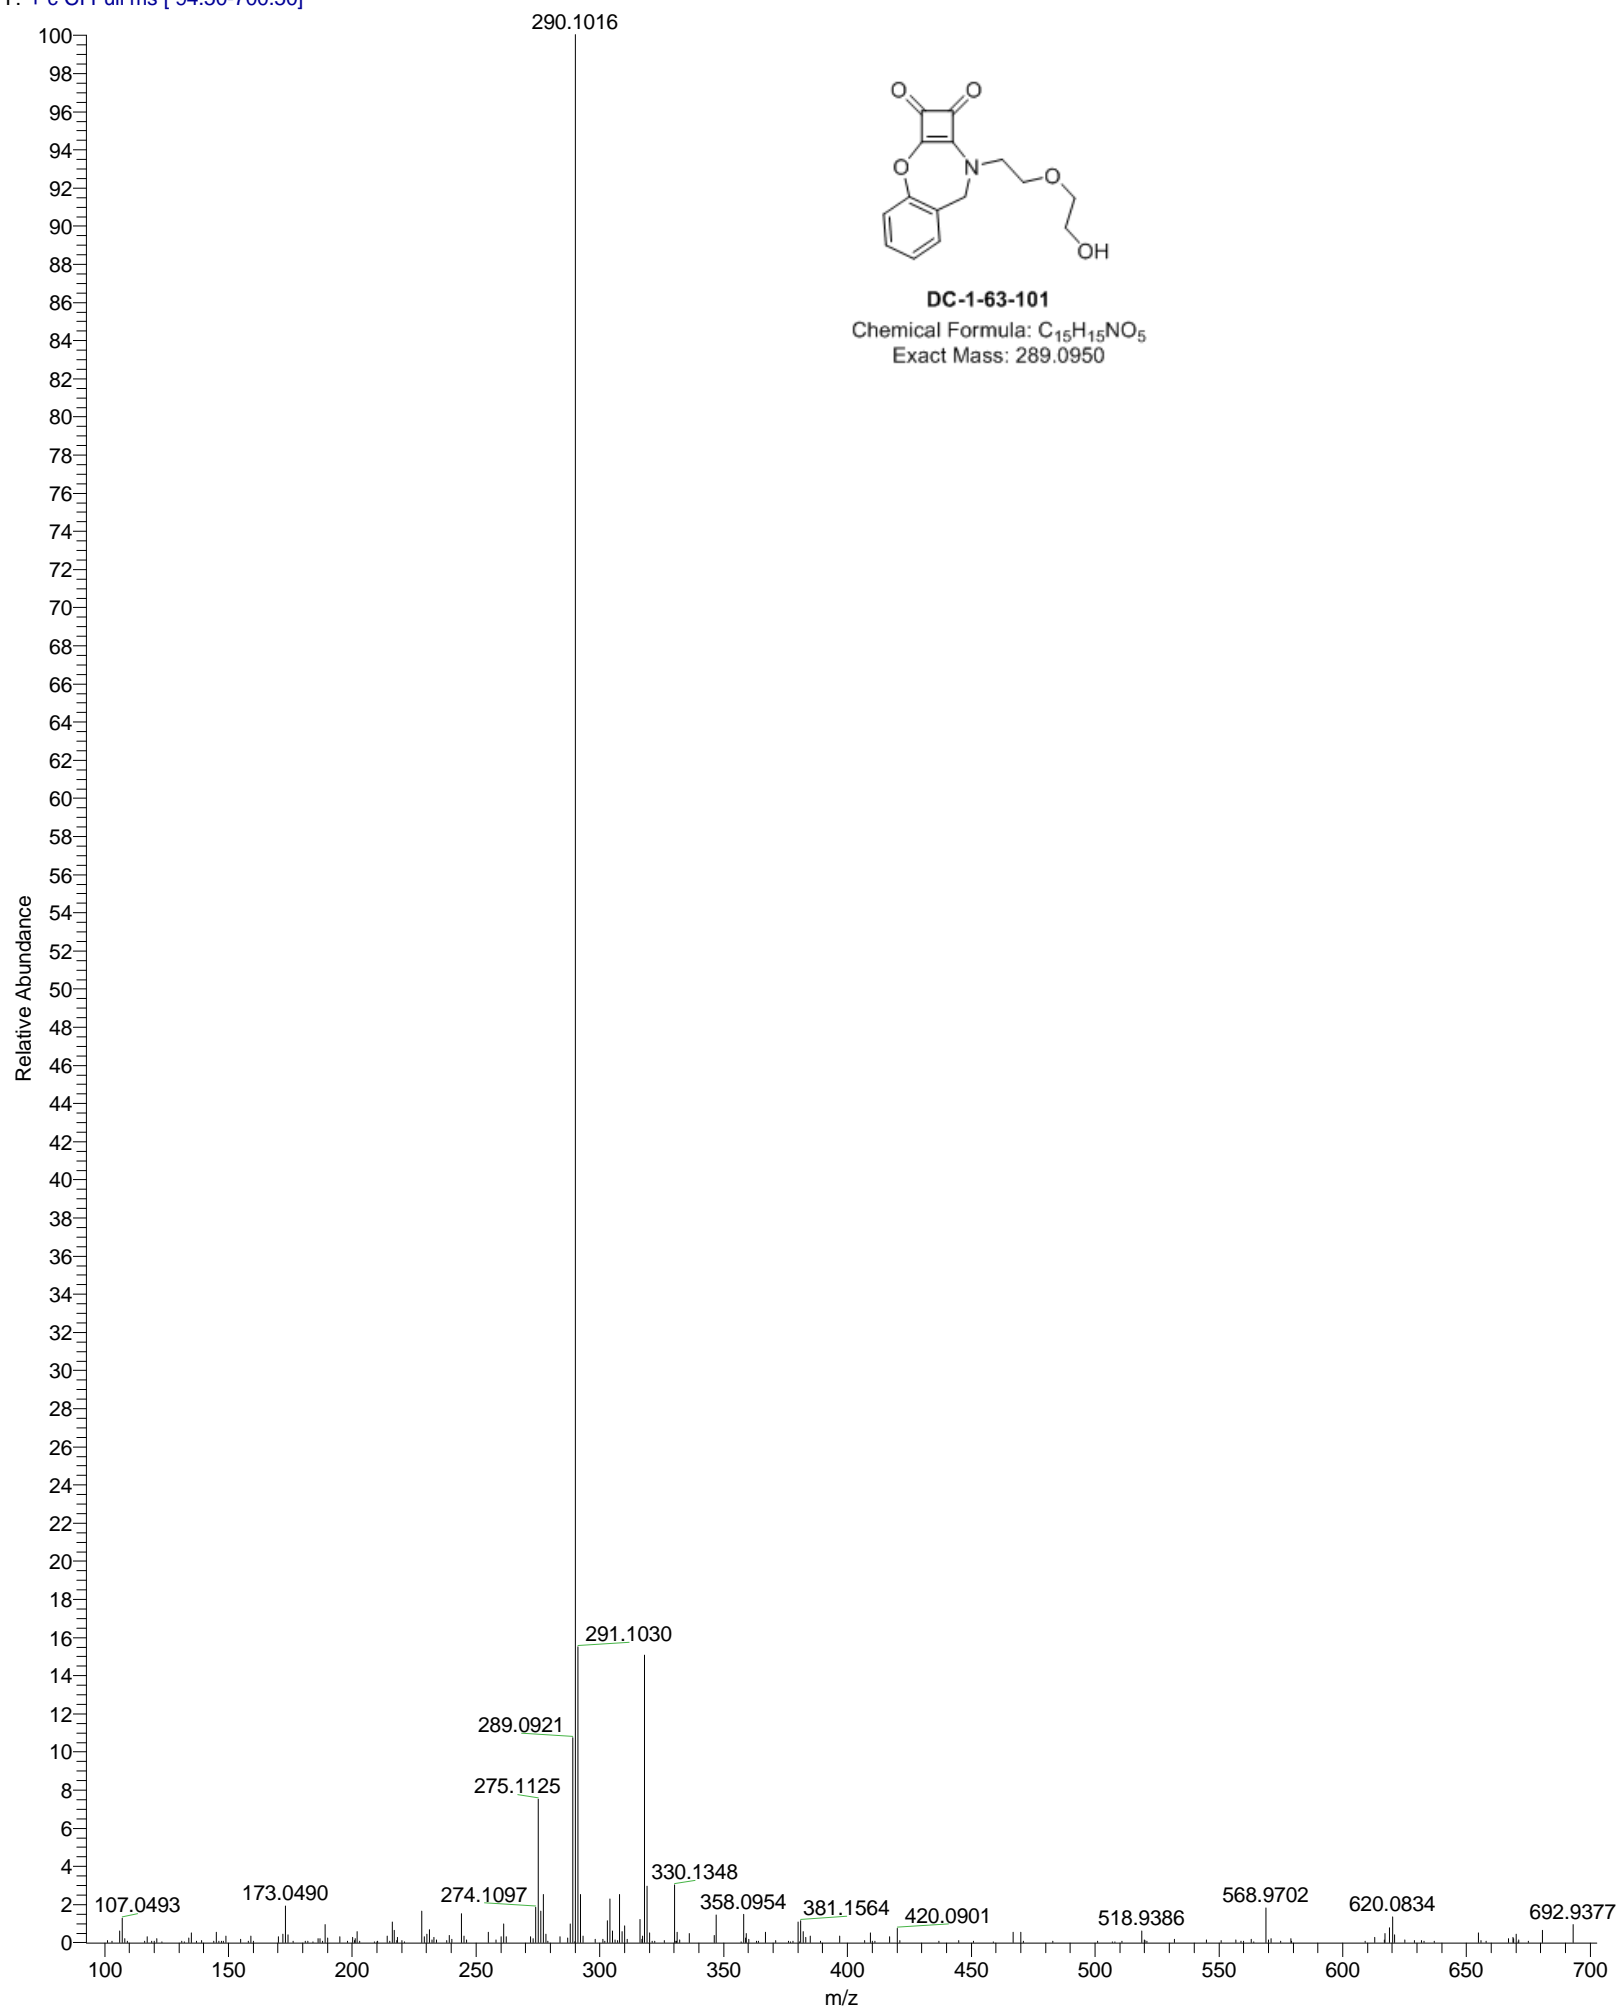

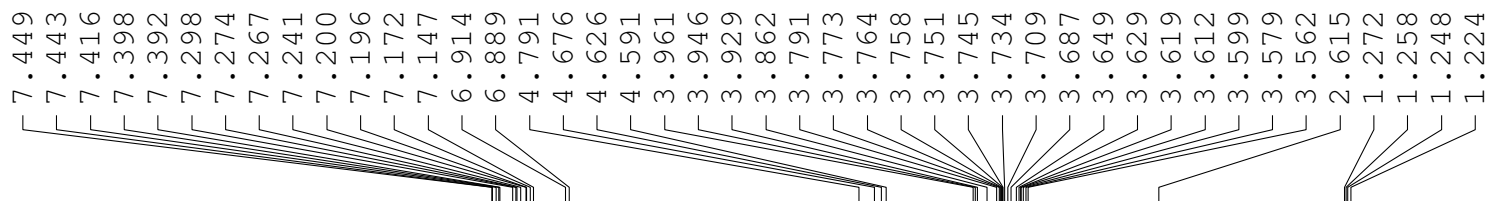

dc-2-63-101b

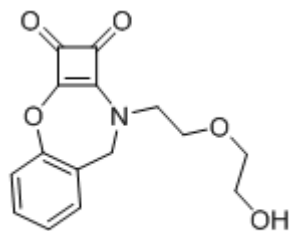

dc-2-63-101b

Current Data Parameters  
 NAME dc-2-63-101b  
 EXPNO 1  
 PROCNO 1

F2 - Acquisition Parameters  
 Date\_ 20100814  
 Time 10.55  
 INSTRUM spect  
 PROBHD 5 mm QNP 1H/1  
 PULPROG zg  
 TD 32768  
 SOLVENT CDCl3  
 NS 8  
 DS 0  
 SWH 4789.272 Hz  
 FIDRES 0.146157 Hz  
 AQ 3.4210291 sec  
 RG 362  
 DW 104.400 usec  
 DE 54.00 usec  
 TE 294.2 K  
 D1 1.00000000 sec  
 TD0 1

==== CHANNEL f1 ====  
 NUC1 1H  
 P1 9.75 usec  
 PL1 0.00 dB  
 SFO1 300.1324000 MHz

F2 - Processing parameters  
 SI 32768  
 SF 300.1300024 MHz  
 WDW no  
 SSB 0  
 LB 0.00 Hz  
 GB 0  
 PC 1.00

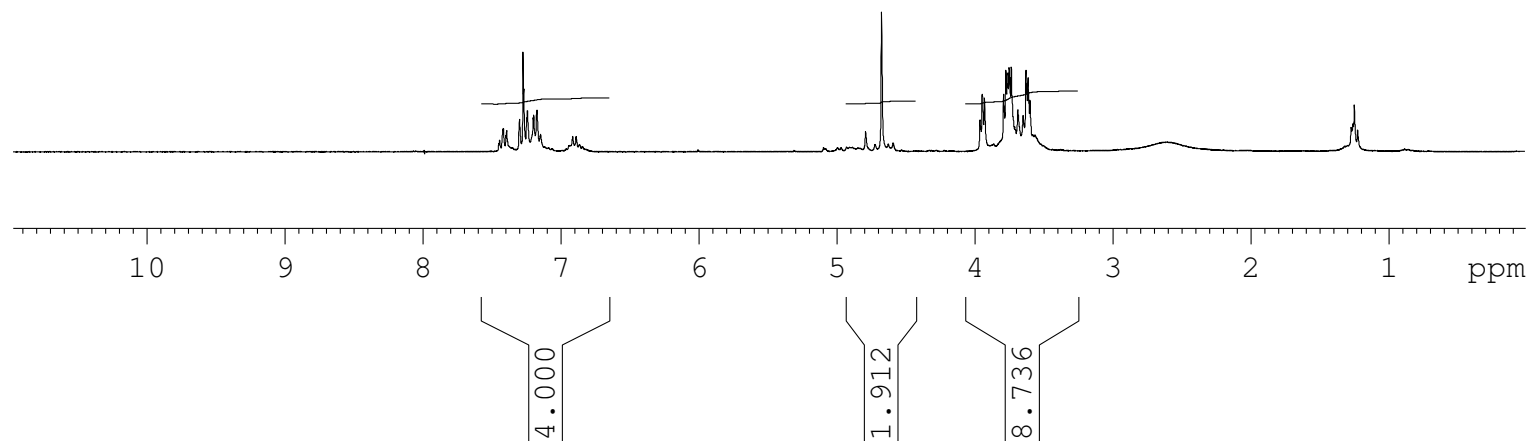

Supplement: c0cc03989f.pdf [file c0cc03989f.pdf]
